1 **Zebrafish larvae as a model system for systematic characterization of drugs and genes in**  
2 **dyslipidemia and atherosclerosis**

3 Manoj K Bandaru<sup>1,2</sup>, Anastasia Emmanouilidou<sup>1,2</sup>, Petter Ranefall<sup>3,4</sup>, Benedikt von der Heyde<sup>1,2</sup>,  
4 Eugenia Mazzaferro<sup>1,2</sup>, Tiffany Klingström<sup>1,2,5</sup>, Mauro Masiero<sup>1,2</sup>, Olga Dethlefsen<sup>6</sup>, Johan  
5 Ledin<sup>5,7</sup>, Anders Larsson<sup>8</sup>, Hannah L Brooke<sup>9</sup>, Carolina Wählby<sup>3,4</sup>, Erik Ingelsson<sup>10,11</sup> and Marcel  
6 den Hoed<sup>1,2,\*</sup>

7 1. The Beijer Laboratory and Department of Immunology, Genetics and Pathology, Uppsala  
8 University, Uppsala, Sweden

9 2. Science for Life Laboratory, Uppsala University, Uppsala, Sweden

10 3. Science for Life Laboratory - BioImage Informatics Facility, Uppsala, Sweden

11 4. Department of Information Technology, Division of Visual Information and Interaction,  
12 Uppsala University, Uppsala, Sweden

13 5. Science for Life Laboratory - Genome Engineering Zebrafish National Facility, Uppsala  
14 University, Uppsala, Sweden

15 6. Science for Life Laboratory - National Bioinformatics Infrastructure Sweden, Stockholm  
16 University, Stockholm, Sweden

17 7. Department of Organismal Biology, Evolutionary and Developmental Biology, Uppsala  
18 University, Uppsala, Sweden

19 8. Department of Medical Sciences, Biochemical structure and function, Uppsala University,  
20 Uppsala, Sweden

21 9. Department of Public Health and Caring Sciences, Uppsala University, Uppsala, Sweden

22 10. Department of Medicine, Division of Cardiovascular Medicine, Stanford University School  
23 of Medicine, Stanford, CA 94305, USA

1 11. Department of Medical Sciences, Molecular Epidemiology, Uppsala University, Uppsala,  
2 Sweden

3

4 **Short title:** zebrafish for translation in atherosclerosis

5 **Word count:** 4396

6 **\*Address for correspondence:**

7 Marcel den Hoed

8 The Beijer Laboratory, Department of Immunology, Genetics and Pathology and SciLifeLab

9 BMC, Husargatan 3

10 Box 815

11 75 108 Uppsala

12 Sweden

13 [marcel.den\\_hoed@igp.uu.se](mailto:marcel.den_hoed@igp.uu.se)

14 +46 70 425 0752

1 **Abstract**

2 **Background:** Hundreds of loci have been robustly associated with circulating lipids,  
3 atherosclerosis and coronary artery disease; but for most loci the causal genes and mechanisms  
4 remain uncharacterized.

5 **Methods:** We developed a semi-automated experimental pipeline for systematic, quantitative,  
6 large-scale characterization of mechanisms, drugs and genes associated with dyslipidemia and  
7 atherosclerosis in a zebrafish model system. We validated our pipeline using a dietary (n>2000),  
8 drug treatment (n>1000), and genetic intervention (n=384), and used it to characterize three  
9 candidate genes in a GWAS-identified pleiotropic locus on chr 19p13.11 (n>500).

10 **Results:** Our results show that five days of overfeeding and cholesterol supplementation had  
11 independent pro-atherogenic effects, which could be diminished by concomitant treatment with  
12 atorvastatin and ezetimibe. CRISPR-Cas9-induced mutations in orthologues of proof-of-concept  
13 genes resulted in higher LDL cholesterol levels (*apoea*), and more early stage atherosclerosis  
14 (*apobb.1*). Finally, our pipeline helped identify putative causal genes for circulating lipids and  
15 early-stage atherosclerosis (*LPAR2* and *GATAD2A*).

16 **Conclusions:** In summary, our pipeline facilitates systematic, *in vivo* characterization of drugs  
17 and candidate genes to increase our understanding of disease etiology, and can likely help  
18 identify novel targets for therapeutic intervention.

## 1 **Introduction**

2 Coronary artery disease (CAD) is the main cause of death worldwide, and results from the  
3 progression of atherosclerosis in the coronary arteries<sup>1</sup>. The response-to-injury theory suggests  
4 that chronic inflammation and dysfunction of the vascular endothelial cell layer are the initial  
5 causes of atherosclerosis<sup>2,3</sup>. Early-stage atherosclerosis manifests itself when circulating LDL  
6 cholesterol (LDLc) infiltrates endothelial cell junctions, accumulates in the vessel wall and  
7 becomes minimally oxidized<sup>2</sup>. Minimally oxidized LDL (oxLDL) subsequently induces pro-  
8 inflammatory changes in the endothelium, by activating platelets and neutrophils<sup>4</sup> and by  
9 recruiting monocytes from the circulation to the vascular intima<sup>5</sup>. These monocytes differentiate  
10 into macrophages, which internalize the oxLDL once it becomes highly oxidized. Apoptosis and  
11 necrosis of these so-called foam cells, together with local accumulation of extracellular lipids,  
12 calcium and other debris can lead to fatty streak formation, which in turn triggers the recruitment  
13 of smooth muscle cells to form a fibrous cap over the necrotic core<sup>6</sup>. Over time, intimal  
14 calcification, neovascularization of growing plaques and degradation of the fibrous cap by  
15 proteases can increase the influx of inflammatory cells into atherosclerotic plaques, thereby  
16 making them unstable. Rupturing of such unstable plaques can ultimately lead to thrombosis and  
17 myocardial infarction.

18 Many major risk factors of CAD have been known since the 1960s<sup>7</sup>, and cholesterol levels and  
19 smoking have since been targeted successfully in the population. The pharmaceutical industry  
20 developed antithrombotic agents (antiplatelet and anticoagulant drugs), which together with early  
21 revascularization resulted in improved and standardized cardiac care and reduced CAD morbidity  
22 and mortality<sup>8-10</sup>. However, the incidence of CAD has since remained relatively stable in higher  
23 income countries, and is now increasing rapidly in lower- and middle-income countries, as a  
24 result of increasingly unhealthy lifestyles<sup>11</sup>. This worrying trend has not been met by the

1 development of conceptually new medication for CAD prevention in the last few decades. Hence,  
2 along with efforts to implement lifestyle-related changes in the population, new drugs are  
3 urgently needed for the primary and secondary prevention of CAD. In addition, the molecular  
4 causes of early-stage atherosclerosis remain poorly understood.

5 Since 2006, increasingly large genome-wide association studies (GWAS) have identified  
6 hundreds of genetic loci that are robustly associated with circulating lipid levels and CAD  
7 susceptibility<sup>12–14</sup>. Some of these loci harbor genes with well-known roles in cholesterol  
8 metabolism – e.g. *APOE*<sup>15</sup>, *APOB*<sup>16</sup> and *LDLR*<sup>17</sup> – and some encode the targets of lipid-lowering  
9 drugs, i.e. *HMGCR* (statins)<sup>18</sup>, *NPC1L1* (ezetimibe)<sup>19</sup> and *PCSK9* (evolocumab)<sup>20,21</sup>. It thus  
10 seems plausible that identifying and characterizing causal genes in the remaining loci would  
11 further increase our understanding of cholesterol metabolism, atherosclerosis and CAD  
12 pathophysiology, and yield new targets for prevention and treatment of CAD<sup>21,22</sup>.

13 Murine model systems have traditionally been used to characterize genes that play a role in  
14 familial hypercholesterolemia and atherosclerosis<sup>23,24</sup>. However, such screens are too time  
15 consuming and costly to facilitate systematic screens across hundreds of candidate genes. In  
16 addition, mice differ in cholesterol ester and triglyceride transport between lipoprotein particles  
17 due to lack of *CETP*<sup>25</sup>, and only develop atherosclerosis in an *LDLR* or *APOE* knockout  
18 background. Alternative *in vivo* model systems that are suitable for high-throughput  
19 characterization of disease-related traits are thus desirable. In this context, zebrafish (*Danio*  
20 *rerio*) provide a promising opportunity.

21 Thanks to their high reproductive rate, rapid early development, optical transparency during  
22 early life and low maintenance costs, the zebrafish has become a popular model system for  
23 human disease<sup>26</sup>. Importantly, in the context of gene characterization, the zebrafish has a well-  
24 characterized genome with orthologues of at least 71.4% of human genes<sup>27</sup>. These genes can now

1 be efficiently targeted in high-throughput using Clustered, Regulatory Interspaced, Short  
2 Palindromic Repeats (CRISPR) and CRISPR-associated systems (Cas)<sup>28</sup>. A range of fluorescent  
3 dyes<sup>29–31</sup> and transgenes<sup>32–35</sup> have been developed that allow visualization of atherogenic  
4 processes at a cellular level in live zebrafish larvae. In recent years, several small-scale studies  
5 have reported that zebrafish larvae fed on a cholesterol-supplemented diet are characterized by  
6 sub-endothelial deposition of lipids in macrophages and other cell types<sup>36</sup>, disorganized vascular  
7 endothelial cells<sup>36</sup>, and vascular accumulation of oxidized low-density lipoprotein (oxLDL)<sup>32</sup>. In  
8 addition, adult zebrafish fed on a cholesterol supplemented diet showed higher plasma levels of  
9 cholesterol, triglycerides and lipoproteins, and formed vascular lesions<sup>37,38</sup>.

10 Proof-of-principle experiments for atherosclerosis in zebrafish described so far have typically  
11 been based on observations in fewer than 25 larvae per condition, at least in part because  
12 mounting larvae in low melting agarose for imaging is time-consuming. In addition, analyses of  
13 whole-body cholesterol and triglyceride levels are usually performed on samples of 20-100  
14 pooled larvae<sup>38,39</sup>. While suitable and efficient for dietary and drug treatment interventions,  
15 pooling larvae for phenotypic characterization is not optimal in CRISPR-based genetic  
16 interventions, where sequencing of individual larvae is desirable. Hence, confirmation of initial  
17 findings, an improved resolution of quantitative readouts, and a higher throughput are required if  
18 zebrafish larvae are to be used as a model system for large-scale characterization of candidate  
19 genes for dyslipidemia, atherosclerosis and CAD.

20 Advances in automated positioning of non-embedded zebrafish larvae<sup>40,41</sup>, custom-written  
21 image-quantification pipelines in publicly available tools, sensitive enzymatic assays and  
22 multiplexed mutagenesis using CRISPR-Cas9 enabled us to develop an experimental pipeline  
23 that allows for high-throughput genetic interventions. We here present validation results from a  
24 large-scale dietary intervention, a treatment intervention with lipid lowering drugs, and a

1 multiplexed, CRISPR-Cas9-based genetic intervention for proof-of-concept genes. The results of  
2 this three-tiered approach confirm that zebrafish larvae can be used to systematically examine the  
3 role of drugs and candidate genes in dyslipidemia, atherosclerosis and CAD. We subsequently  
4 characterized three candidate genes in a GWAS-identified pleiotropic locus on chr 19p13.11 that  
5 showed evidence of association with LDLc, triglyceride and total cholesterol levels<sup>42</sup> in humans.  
6 Our results confirm that our pipeline will increase our understanding of disease etiology at a  
7 molecular level, will help prioritize the most promising putative causal genes for further in-depth  
8 characterization, and will likely help identify novel targets that can be translated into efficient  
9 new medication for prevention and treatment of CAD.

## 1 **Results**

### 2 ***Overfeeding and cholesterol supplementation have independent pro-atherogenic effects***

3 To quantify and distinguish between the atherogenic potential of overfeeding and dietary  
4 cholesterol, >2000 larvae from three transgenic backgrounds (**Fig. 1, Supplementary Tables 1**  
5 **and 2**) were fed on one of six diets starting from the age of 5 days post-fertilization (dpf) until 9  
6 dpf (**Methods**).

7 Five days of overfeeding on average resulted in longer larvae, with a larger body surface area  
8 and volume normalized for length (**Fig. 2a-i, Supplementary Fig. 1, Supplementary Table 3**).

9 Overfeeding induced a triglyceride-driven increase in total cholesterol levels, without materially  
10 affecting LDLc, HDLc or glucose levels (**Fig. 2a-iii, Supplementary Fig. 2, Supplementary**  
11 **Table 4**). Overfeeding resulted in more lipid deposition (**Fig. 2a-ii, Supplementary Fig. 3,**  
12 **Supplementary Table 5**). We further ensured that the observed lipid deposition was indeed  
13 located inside the vascular endothelium using larvae with fluorescently labelled endothelial cells  
14 (*Tg:flk-EGFP*) (**Fig. 1d, Supplementary Table 1**). Of the 361 *Tg:flk-EGFP* positive larvae that  
15 showed at least some vascular lipid deposition, 355 (98.3%) had all lipid deposits co-localize  
16 with circulating lipids and/or vascular endothelial cells, implying that almost all deposits were at  
17 least partly located inside the endothelial cell layer. The remaining deposits appear to be false  
18 positives, illustrating the high sensitivity (72%) and specificity (93%) of our image quantification  
19 pipeline for detection of vascular lipid deposition. Overfeeding also resulted in more vascular  
20 accumulation of oxLDL; more co-localization of oxLDL with macrophages; and more vascular  
21 co-localization of lipids with neutrophils. We also observed some evidence for a positive effect of  
22 overfeeding on vascular infiltration by neutrophils and on endothelial thickness (**Fig. 2a-ii,**  
23 **Supplementary Fig. 3, Supplementary Table 5**).



1 Five days of dietary cholesterol supplementation resulted in shorter larvae, without affecting  
2 body surface area or volume normalized for length (**Fig. 2b-i, Supplementary Fig. 1,**  
3 **Supplementary Table 3**), and without influencing food intake (**Supplementary Fig. 4**).  
4 Cholesterol supplementation induced an LDLc-driven increase in total cholesterol levels, while  
5 lowering HDLc (trend) and triglyceride levels (**Fig. 2b-iii, Supplementary Fig. 2,**  
6 **Supplementary Table 4**). Cholesterol supplementation did not influence vascular accumulation  
7 of lipids and oxLDL, but tended to result in more co-localization of lipids with neutrophils, and  
8 in less co-localization of oxLDL with macrophages (**Fig. 2b-ii, Supplementary Fig. 3,**  
9 **Supplementary Table 5**).

10 As described in earlier studies<sup>36,37,39</sup>, we supplemented regular dry food with extra cholesterol  
11 using diethyl ether, which may itself affect endogenous cholesterol levels<sup>43</sup>. Our results show that  
12 diethyl ether per se indeed resulted in: 1) higher triglyceride (trend) and total cholesterol levels  
13 (**Supplementary Table 4**); 2) less vascular co-localization of lipids with neutrophils; 3) a lower  
14 endothelial thickness (**Supplementary Table 5**); and 5) a lower food intake (**Supplementary**  
15 **Fig. 4**). Hence, absence of a control group fed on diethyl ether-treated food without cholesterol  
16 supplementation would have resulted in biased estimates for the effect of cholesterol  
17 supplementation.

18 Neither overfeeding, nor cholesterol supplementation or diethyl ether supplementation was  
19 associated with suboptimal image quality or image quantification. Hence, exclusion of larvae  
20 based on these criteria likely did not influence the results of the dietary intervention  
21 (**Supplementary Table 6**).

22

## 1 ***Combined treatment with atorvastatin and ezetimibe has an atheroprotective effect***

2 To examine whether the commonly prescribed LDLc lowering drugs atorvastatin and ezetimibe  
3 exert similar effect in zebrafish, we overfed >1,000 larvae on a cholesterol supplemented diet  
4 with or without concomitant atorvastatin and ezetimibe treatment, from 5 dpf until 9 dpf.  
5 Compared with untreated larvae, five days of combined treatment with atorvastatin and ezetimibe  
6 resulted in leaner larvae (**Fig. 2c-i, Supplementary Fig. 1, Supplementary Table 7**), without  
7 affecting food intake (**Supplementary Fig. 4**). On average, atorvastatin and ezetimibe treatment  
8 also resulted in lower whole-body LDLc, triglyceride and total cholesterol levels, and in higher  
9 glucose levels (**Fig. 2c-iii, Supplementary Fig. 2, Supplementary Table 8**). In larvae with data  
10 on LDLc (n=564), atorvastatin and ezetimibe's effect on glucose levels was independent of  
11 triglyceride (beta: 0.13 SD; 95% CI: 0.04 to 0.22 SD), but not LDLc levels (0.05, -0.05 to 0.15  
12 SD).

13 Treatment with atorvastatin and ezetimibe resulted in less vascular lipid deposition and less  
14 co-localization of lipids with macrophages and with neutrophils. On the other hand, treated larvae  
15 on average had more vascular co-localization of oxLDL with macrophages (**Fig. 2c-ii,**  
16 **Supplementary Fig. 3, Supplementary Table 9**).

17 Larvae treated with atorvastatin and ezetimibe were more likely to move during imaging (due  
18 to their leaner bodies) and had lower odds of many false positive oxLDL deposits. Exclusion of  
19 larvae with such suboptimal imaging or quantification data is unlikely to have influenced the  
20 results (**Supplementary Table 10**).

## 21 ***Mutations in zebrafish orthologues of APOE and APOB exert pro-atherogenic effects***

22 To further validate the zebrafish as a model system, orthologues of genes with an established role  
23 in dyslipidemia and atherosclerosis - *APOE*, *APOB* and *LDLR* - were targeted together using a

1 multiplexed CRISPR-Cas9 approach. These three genes together have seven orthologues in  
2 zebrafish (*apo<sub>ea</sub>*, *apo<sub>eb</sub>*, *apo<sub>ba</sub>*, *apobb.1*, *apobb.2*, *ldlra* and *ldlr<sub>b</sub>*) (**Supplementary Tables 11**  
3 **and 12**). Across the seven CRISPR-Cas9-targeted orthologues, we observed a median of 15  
4 unique amplicons per targeted site in the 384 sequenced F<sub>1</sub> larvae (**Supplementary Table 13**).  
5 Compared with the reference genome, the 384 sequenced F<sub>1</sub> larvae together contained 55  
6 frameshift variants, nine variants that introduced a premature stop codon, 34 missense variants,  
7 13 in frame deletions, two in frame insertions, four synonymous variants, and 18 upstream  
8 variants within  $\pm 30$  bp of the targeted sites (**Supplementary Table 14**). The mutant allele  
9 frequency was typically high across the seven targeted sites (i.e. median 0.883, **Supplementary**  
10 **Table 15**).

11 Most larvae carried two functionally knocked alleles in *apo<sub>ba</sub>* and *apobb.2* – i.e. frame shift  
12 mutations and/or variants introducing a premature stop codon in both alleles – as well as bi-  
13 allelic mutations immediately upstream of *ldlr<sub>b</sub>* that were predicted to modify *ldlr<sub>b</sub>* gene  
14 expression (**Supplementary Tables 14 and 15**). Since there were no wildtype larvae for *apo<sub>ba</sub>*,  
15 *apobb.2* and *ldlr<sub>b</sub>*, we could not examine the role of these three orthologues. For the four  
16 remaining orthologues (*apo<sub>ea</sub>*, *apo<sub>eb</sub>*, *apobb.1* and *ldlra*), a genetic burden score comprising the  
17 sum of the number of mutated alleles across the four genes, weighted by their predicted effect on  
18 protein function was normally distributed. The score was associated with higher HDLc levels,  
19 more vascular lipid deposition, and more vascular co-localization of lipids with neutrophils  
20 (**Supplementary Fig. 5, Supplementary Tables 16-18**).

21 When examining the influence of mutations in each gene separately, we observed that larvae  
22 carrying two functionally knocked alleles in *apo<sub>ea</sub>* had higher whole-body LDLc and lower  
23 triglyceride (trend) levels, without an effect on body size or early-stage atherosclerosis (**Fig. 2d-**  
24 **ii, Supplementary Tables 20 and 21**). Larvae with two functionally knocked *apo<sub>eb</sub>* alleles

1 showed at most a trend for more vascular accumulation of lipids and co-localization of  
2 macrophages with neutrophils, without affecting whole-body lipoprotein or glucose levels  
3 (**Supplementary Fig. 6b, Supplementary Tables 20 and 21**). On average, larvae with two  
4 functionally knocked *apobb.1* alleles were shorter than larvae with two unmodified alleles (**Fig.**  
5 **2e-i, Supplementary Table 19**), and had higher triglyceride (trend) and lower total cholesterol  
6 and glucose levels (**Fig. 2e-iii, Supplementary Table 20**). They were also characterized by more  
7 vascular accumulation of lipids, and by more vascular co-localization of lipids with macrophages  
8 and with neutrophils, independently of whole-body lipoprotein or glucose levels (**Fig. 2e-ii,**  
9 **Supplementary Table 21**). While less than half of the larvae carrying no mutated *apobb.1* alleles  
10 showed any vascular co-localization of lipids with macrophages (44%) and neutrophils (15%),  
11 more than two out of three larvae carrying two functionally knocked *apobb.1* alleles showed such  
12 vascular co-localization. Finally, larvae with two functionally knocked *ldlra* alleles were similar  
13 on all accounts to larvae free from CRISPR-induced mutations in the gene, except for having less  
14 vascular co-localization of macrophages with neutrophils (**Supplementary Fig. 6d,**  
15 **Supplementary Tables 19-21**).

16 Across the four zebrafish orthologues (*apoae*, *apoeb*, *apobb.1* and *ldlra*), results were similar  
17 when data were analyzed using an additive model in which the number of mutated alleles was  
18 weighted by their predicted effect on protein function (**Supplementary Tables 22-24**). In the  
19 presence of a genetic effect, the effect size of two vs. zero functionally knocked alleles was  
20 typically approximately twice the additive per allele effect (**Figs. 2d-e, Supplementary Fig. 6**),  
21 consistent with an underlying additive model. Additional analyses showed that suboptimal image  
22 quality or image quantification in a small subset of larvae is unlikely to have influenced the  
23 results (**Supplementary Table 25**).

1        Since *APOE*, *APOB* and *LDLR* interact to process triglyceride-rich LDLc in humans, we next  
2        examined two-way gene x gene interactions for *apoea*, *apobb.1* and *ldlra*; i.e. the genes that  
3        showed the most promising results individually. Focusing on interactions that were observed  
4        under an additive model and that were confirmed when comparing larvae with two vs. zero  
5        functionally knocked alleles only shows cautious evidence of a positive interaction between  
6        mutations in *apoea* and *ldlra* for vascular accumulation of lipids and co-localization of lipids  
7        with macrophages (**Supplementary Tables 26-28**).

### 8        ***Vascular atherogenic traits are associated with whole-body triglyceride levels***

9        Data from the dietary, drug treatment and genetic interventions combined showed that LDLc,  
10        HDLc and triglyceride levels together explained 47% of the variance in directly assessed total  
11        cholesterol levels (n=1,867). Interestingly, the Friedewald equation (i.e. LDLc + HDLc +  
12        triglycerides/5)<sup>44</sup> did not perform much worse, explaining 43% of the variance in total cholesterol  
13        levels (**Supplementary Fig. 7**). We next explored the mutually adjusted association of vascular  
14        atherogenic traits with whole-body LDLc, HDLc, triglyceride and glucose levels in data from the  
15        dietary, drug treatment and proof of concept genetic intervention studies combined. Vascular  
16        accumulation of lipids, co-localization of lipids with macrophages and neutrophils, and co-  
17        localization of oxLDL with macrophages were all positively associated with whole-body  
18        triglyceride levels, independently of LDLc, HDLc and glucose levels. Furthermore, vascular  
19        accumulation of oxLDL and co-localization of lipids with neutrophils showed some evidence of a  
20        positive association with whole-body HDLc levels, in line with the absence of effects on primary  
21        clinical endpoint events observed in large clinical trials that therapeutically elevated HDLc levels  
22        and reduced triglyceride and/or LDLc levels<sup>45-48</sup>. Interestingly, vascular co-localization of lipids  
23        with neutrophils showed independent positive associations with LDLc, HDLc and triglyceride

1 levels. Finally, we observed negative associations of whole-body glucose levels with vascular  
2 accumulation of lipids, co-localization of lipids with macrophages, and co-localization of  
3 macrophages with oxLDL, suggesting that hyperglycemia per se is perhaps not responsible for  
4 the elevated risk of CAD in diabetes patients, at least not by increasing early stage atherosclerosis  
5 **(Supplementary Fig. 8, Supplementary Table 29).**

### 6 ***Identifying putative causal genes for circulating lipids and early-stage atherosclerosis***

7 Based on the positive association of vascular atherogenic traits with triglyceride levels in our  
8 combined analysis, in combination with the known causal effect of high triglyceride levels on  
9 CAD incidence<sup>49</sup>, we used DEPICT<sup>50</sup> to prioritize candidate genes in 23 triglyceride-associated  
10 loci<sup>42</sup>. In one of these loci represented by the intronic rs10401969 in *SUGPI* on chr 19p13.11,  
11 DEPICT prioritized *LPAR2*, *GMIP*, *GATAD2A* and *TM6SF2*. The four prioritized genes together  
12 have six orthologues in zebrafish **(Supplementary Table 30)**, which we targeted simultaneously  
13 **(Supplementary Table 31).**

14 Across the six CRISPR-Cas9-targeted orthologues (*lpar2a*, *lpar2b*, *gmip*, *gatad2ab*, *tm6sf2*  
15 and *zgc:85843*), we observed a median of 2.5 unique amplicons per targeted site  
16 **(Supplementary Table 32)**. Compared with the reference genome, the 547 sequenced F<sub>1</sub> larvae  
17 together contained four frameshift variants, three missense variants, and four in-frame deletions  
18 that were located within  $\pm 30$  bp of the CRISPR targeted sites **(Supplementary Table 33)**. In  
19 spite of having pre-tested the CRISPR gRNAs for efficiency, all F<sub>1</sub> larvae carried two  
20 unmodified alleles for the zebrafish orthologues of *TM6SF2* (*tm6sf2* and *zgc:85843*) and *GMIP*  
21 (*gmip*), and mutant allele frequencies were low for *gatad2ab* (0.029), *lpar2a* (0.010), and *lpar2b*  
22 (0.005) **(Supplementary Table 34)**.

1 In spite of the low statistical power to find associations, we observed evidence for lower  
2 LDLc, triglyceride and total cholesterol levels in the 11 larvae with a mutated *lpar2a* allele when  
3 compared with larvae with two unmodified alleles. Counterintuitively, these larvae also showed  
4 some evidence for having more vascular co-localization of lipids with macrophages and with  
5 neutrophils. (**Fig. 3a, Supplementary Tables 35-37**). In addition to the effects observed for  
6 *lpar2a*, the six larvae with a mutated *lpar2b* allele were longer and tended to have lower  
7 HDLc levels compared with larvae free from CRISPR-induced *lpar2b* mutations (**Fig. 3b,**  
8 **Supplementary Tables 35-37**). Finally, the 32 larvae with a mutated *gatad2ab* allele were larger  
9 and tended to have lower HDL levels and higher triglyceride levels when compared with larvae  
10 with two unmodified alleles (**Fig. 3c, Supplementary Table 36**). Exclusion of larvae with  
11 suboptimal image quality or image quantification is unlikely to have influenced the results  
12 (**Supplementary Table 38**).

## 1 **Discussion**

2 We developed and validated a largely image-based experimental pipeline in zebrafish larvae that  
3 is suitable to systematically characterize candidate genes and drugs for dyslipidemia and early-  
4 stage atherosclerosis and inflammation. Our dietary intervention showed that five days of  
5 overfeeding and cholesterol supplementation are sufficient to induce early-stage atherosclerosis  
6 and vascular inflammation in zebrafish larvae, without the need to use an *APOE* or *LDLR* and  
7 *CETP* knockout background as is customary in mouse models. Our drug treatment intervention  
8 showed that the pro-atherogenic effects of overfeeding and cholesterol supplementation can be  
9 diminished by concomitant treatment with atorvastatin and ezetimibe. A proof-of-concept genetic  
10 screen showed that CRISPR-Cas9-induced mutations in zebrafish orthologues of *APOE* and  
11 *APOB* trigger a pro-dyslipidemia, pro-atherogenic and pro-inflammatory phenotype that is in line  
12 with the known role of these genes. Finally, we illustrate the merit of our pipeline by attributing a  
13 role in cholesterol metabolism and atherosclerosis to *LPAR2* and *GATAD2A*; two genes in a  
14 pleiotropic locus on chr 19p13.11.

15 The evidence for high dietary cholesterol levels being a risk factor for CAD in the general  
16 population is conflicting<sup>51-53</sup>. In an adequately powered dietary intervention, we showed that  
17 overfeeding and cholesterol supplementation have independent pro-inflammatory and pro-  
18 atherogenic effects in zebrafish larvae. Both induced higher whole-body total cholesterol levels,  
19 albeit via different mechanisms. While overfeeding resulted in higher triglyceride levels,  
20 cholesterol supplementation induced higher LDLc levels. Both overfeeding and cholesterol  
21 supplementation resulted in more vascular co-localization of lipids with neutrophils, with a  
22 comparable effect size. However, cholesterol supplementation did so without affecting vascular  
23 accumulation of lipids per se, suggesting that primary accumulation of lipids in the vessel wall is  
24 likely mostly driven by triglyceride levels. In line with this, data from the dietary, drug treatment



1 and genetic interventions combined showed a positive association for triglyceride levels – but not  
2 LDLc – with vascular lipid deposition. Furthermore, mutations in *apobb.1* that resulted in higher  
3 whole-body triglyceride levels also induced more vascular accumulation of lipids – albeit  
4 independently of triglyceride levels – while mutations in *apoeba* that resulted in higher whole-  
5 body LDLc levels had no effect on vascular lipid deposition.

6 Treating larvae with atorvastatin and ezetimibe resulted in lower whole-body LDLc and total  
7 cholesterol levels; and in less vascular co-localization of lipids with macrophages; yet –  
8 paradoxically – in more vascular co-localization of oxLDL with macrophages. A directionally  
9 consistent (i.e. opposite) effect was observed for the effect of dietary cholesterol supplementation  
10 on vascular co-localization of oxLDL with macrophages. Moreover, cholesterol supplementation  
11 or drug treatment did not affect accumulation of oxLDL or macrophages per se. Taken together,  
12 these observations suggest that ezetimibe’s exogenous cholesterol lowering effect may be  
13 responsible for improved recruitment of macrophages to oxLDL; engulfing of oxLDL by  
14 macrophages; survival of macrophages that successfully engulfed oxLDL; and/or clearing of  
15 neutral lipid deposits by macrophages. The opposite rationale applies to elevated exogenous  
16 cholesterol levels following dietary cholesterol supplementation.

17 In line with results from clinical trials<sup>54,55</sup> and genetic association studies<sup>56,57</sup> in humans,  
18 zebrafish larvae treated with atorvastatin and ezetimibe were characterized by higher glucose  
19 levels, on average. Additional analyses indicated that the drugs’ effect on glucose levels is likely  
20 mediated by LDLc. Hence, main effects and mediation analyses based on whole-body cholesterol  
21 and glucose levels in zebrafish larvae are sufficiently sensitive to provide valuable new insights.

22 The *apobb.1* orthologue accounts for ~95% of zebrafish apob protein. Like human apoB-48,  
23 *apobb.1* catabolizes triglyceride-rich chylomicrons in the intestine<sup>58</sup>, which explains the higher  
24 whole-body triglyceride levels with each additional mutated *apobb.1* allele and the more severe

1 pro-atherogenic and pro-inflammatory profiles in *apobb.1* mutant larvae. These findings together  
2 suggest that *apobb.1*<sup>-/-</sup> zebrafish are likely a promising model to examine candidate genes and  
3 drugs for a role in dyslipidemia and atherosclerosis. The observation that *apobb.1* mutant  
4 zebrafish larvae have lower glucose levels is directionally consistent with higher plasma Apo B  
5 levels being associated with a higher incidence of diabetes in humans<sup>59,60</sup>.

6 Mutations in *ldlra* were not associated with dyslipidemia, early-stage atherosclerosis or  
7 vascular inflammation in our study. This contrast with established results in humans and mouse  
8 models likely reflects the presence of a second – albeit downregulated - *LDLR* orthologue in  
9 zebrafish (*ldlrb*); the possibility of *cetp*-mediated reverse cholesterol transport to remove excess  
10 cholesterol from the body in zebrafish; or the early stage of development at which we performed  
11 our screen, i.e. at 10 days post-fertilization. Two studies previously did implicate *ldlra* in  
12 dyslipidemia and early-stage atherosclerosis in zebrafish larvae<sup>39,61</sup>. While differences in age,  
13 food intake, microbial environment, enzymatic assays, normalization for protein content<sup>62</sup>,  
14 genetic manipulation<sup>63</sup> and adjustment for co-variables across studies may have influenced the  
15 results, the difference in sample size between studies is most noteworthy. O’Hare et al. compared  
16 combined LDLc and VLDLc levels using repeated measures on samples of 100 pooled  
17 morpholino-injected and 100 pooled control-injected larvae<sup>39</sup>, while Liu et al. compared  
18 triglyceride and total cholesterol levels in four wildtype larvae and four larvae that were  
19 homozygous for mutations in *ldlra*<sup>61</sup>. In contrast, we compared cholesterol levels in 181 and 120  
20 individual larvae with two and zero functionally knocked alleles, respectively, and included data  
21 from 381 larvae in our additive analyses.

22 While mutations in *ldlra* and *apoec* alone did not trigger early-stage atherosclerosis ,  
23 mutations in these genes showed a positive interaction for vascular accumulation of lipids and co-

1 localization of lipids with macrophages. It appears that absence of both *ldlra* and *apoec* cannot be  
2 compensated in zebrafish larvae.

3 Like humans, zebrafish are genetically heterogeneous, and we observed a normal or negative  
4 binomial distribution for the examined outcomes, with substantial variance by transgenic  
5 background and batch in the dietary, drug treatment and genetic interventions. These findings  
6 stress the importance of including data from a large number of larvae to acquire meaningful  
7 results. We show it is now feasible to objectively quantify dyslipidemia, early-stage vascular  
8 atherosclerosis and inflammation, and body size using image-based as well as enzymatic  
9 approaches in large numbers of individual zebrafish larvae with relative ease, thus enabling  
10 adequately powered, systematic characterization of candidate genes and drugs in zebrafish model  
11 systems.

12 Our characterization of zebrafish orthologues of candidate genes in a pleiotropic locus on chr  
13 19p13.11 suggested a role for *LPAR2* in cholesterol metabolism and early-stage atherosclerosis,  
14 and for *GATAD2A* in cholesterol metabolism. *LPAR2* belongs to family I of the G-protein  
15 receptors and functions to mobilize calcium in response to lysophosphatidic acid (LPA), while  
16 *GATAD2A* encodes a transcriptional repressor. Unfortunately, all larvae in our screen were  
17 wildtype for the two CRISPR-targeted orthologues of *TM6SF2*. Knockdown and knockout of  
18 *Tm6sf2* in mice was previously shown to result in lower circulating triglyceride, LDLc, HDLc  
19 and total cholesterol levels; as well as in higher hepatic triglyceride and cholesteryl esters; more  
20 and larger neutral lipid droplets in the liver; a higher risk of hepatic steatosis; and less  
21 atherosclerosis<sup>64-66</sup>. Like *Tm6sf2* deficient mice, *lpar2a* mutant zebrafish larvae had lower  
22 triglyceride, LDLc and total cholesterol levels. However, in contrast with *Tm6sf2* mutant mice,  
23 *lpar2a* mutant zebrafish larvae had more early-stage atherosclerosis, possibly driven by higher

1 lysophosphatidic acid levels. Lysophosphatidic acid has been shown to increase NFκB, IL-8 and  
2 MCP-1 secretion from endothelial cells, which attract neutrophils and macrophages<sup>67,68</sup>; and  
3 induces barrier dysfunction and elevated monocyte adhesion to the minimally modified LDL  
4 within the intima of vasculature<sup>69</sup>. The range of bi-directional effects of genes in this pleiotropic  
5 locus on cardiovascular risk factors explains why the C allele of rs10401969 is only associated  
6 with a trend towards a lower risk of CAD in humans (OR=0.95, P=2.8E-3, n=268,744)<sup>12</sup>.

7 In conclusion, zebrafish larvae can be used as a time and cost-efficient model system for  
8 image- and CRISPR-Cas9-based genetic interventions, as illustrated by the identification of  
9 putative causal genes for cholesterol metabolism (*LPAR2* and *GATAD2A*) and for early-stage  
10 atherosclerosis and inflammation (*LPAR2*). Our approach represents an opportunity to reduce the  
11 hundreds of candidate genes in GWAS-identified loci to a more feasible number for: 1) further  
12 in-depth characterization using animal models; 2) more targeted whole-genome or whole-exome  
13 sequencing efforts; and 3) characterization using genotype-based recall efforts. In addition, our  
14 pipeline can be used to characterize mechanisms of action for existing drugs, and may prove  
15 useful for target-specific small molecule screens.

## 1 **Online Methods**

### 2 **1 *Transgenic backgrounds and atherogenic traits***

3 We used three combinations of fluorescent transgenes (backgrounds) with a lipid-staining dye<sup>30</sup>  
4 (see below) to visualize and quantify (see ‘*Image quantification*’) molecular processes that are  
5 known to play a role in early-stage atherosclerosis (**Table 1**). Firstly, zebrafish carrying  
6 transgenes to fluorescently label macrophages (*Tg:mpeg1-mCherry*<sup>33</sup>) and neutrophils (*Tg:mpo-*  
7 *EGFP*<sup>35</sup>) were crossed to yield a stable line in which we can visualize and quantify vascular  
8 accumulation and co-localization of lipids<sup>30</sup>, macrophages<sup>33</sup> and neutrophils<sup>35</sup> (**Fig. 1b**).  
9 Secondly, we in-crossed zebrafish that express a fluorescently labelled antibody (IK17) against  
10 oxLDL (*Tg:hsp70:IK17-EGFP*)<sup>32</sup> to allow visualization and quantification of vascular  
11 accumulation of lipids<sup>30</sup> and oxLDL<sup>32</sup>, and we crossed *Tg:hsp70:IK17-EGFP*<sup>32</sup> carriers with  
12 *Tg:mpeg1-mCherry* carriers to yield a stable line in which we can visualize and quantify vascular  
13 accumulation and co-localization of lipids<sup>30</sup>, oxLDL<sup>32</sup> and macrophages<sup>33</sup> (**Fig. 1b-c**). Thirdly,  
14 carriers of the *flk:EGFP* transgene (*Tg:flk-EGFP*<sup>34</sup>) allowed us to quantify vascular accumulation  
15 of lipids, confirm or refute whether vascular lipid deposits are located inside the endothelial cell  
16 layer, and quantify the endothelial thickness (**Fig. 1d**). In all backgrounds, circulating lipids and  
17 vascular lipid deposits were visualized using a dye that preferentially partitions in lipid droplets  
18 and that has a blue-shifted, highly enhanced emission in lipophilic environments  
19 (monodansylpentane cadaverase [MDH], Abgent, Nordic Biosite, Täby, Sweden)<sup>30</sup>.

20 After imaging, we used enzymatic assays to assess whole-body LDLc, HDLc, triglyceride,  
21 total cholesterol and glucose levels. DNA was isolated from the remaining tissue for paired-end  
22 sequencing of CRISPR-Cas9 targeted sites in the genetic interventions (see ‘*genetic*  
23 *intervention*’).

## 1    2        ***Husbandry***

2    All experiments described below were performed in zebrafish larvae. Adult transgenic fish and  
3    CRISPR founders were raised and kept solely for breeding purposes. Adult fish were fed twice  
4    daily on rotifers and dry food (Sparos, Olhão, Portugal), and were maintained in circulating and  
5    filtered water (Aquaneering Inc., San Diego, CA), in accordance with Swedish regulations. To  
6    generate the required offspring, transgenic adult fish were in-crossed, and fertilized eggs were  
7    raised in an incubator at 28.5°C until 5 days post-fertilization (dpf). At 3dpf, embryos were  
8    optically screened for fluorescence in 96-well plates (EVOS FL Auto, Thermo Fisher Scientific,  
9    MA, USA), and embryos carrying the fluorescent transgene(s) were retained and placed back in  
10   the incubator. From 5 to 10dpf, zebrafish larvae were kept in 1L tanks filled with 300mL of water  
11   at a density of 30 larvae/tank. Larvae were fed twice daily until 9dpf. At 7dpf, waste products and  
12   debris were removed from the water, followed by replenishing of the water level to 300ml.  
13   *Tg:hsp70:IK17-EGFP* larvae were subject to a 37°C heat shock for 1 hour at 9dpf, to induce  
14   expression of the transgene for screening (see ‘Experimental procedure, imaging’).

## 15   3        ***Dietary intervention***

16   To identify the atherogenic potential of overfeeding and dietary cholesterol supplementation,  
17   larvae from all backgrounds were fed on one of six diets from 5 to 9dpf before being screened at  
18   10dpf. Diets consisted of a normal (~5mg/feeding/tank) or larger amount (~15mg/feeding/tank)  
19   of: 1) standard dry food (Golden Pearls, 50-100 µm particles, Alcester, UK); 2) standard dry food  
20   supplemented with 4% (wt/wt) extra cholesterol (≥99%, Sigma-Aldrich, Stockholm, Sweden)  
21   using a 1:1 volume ratio of diethyl ether to food (>99%, Fisher Scientific, Stockholm, Sweden)<sup>36</sup>;  
22   or 3) standard dry food treated with the same amount of diethyl ether without extra cholesterol.  
23   The latter condition was added to distinguish between effects of dietary cholesterol

1 supplementation and/or treatment of the food with diethyl ether per se. To ensure the standard  
2 and cholesterol-supplemented diets were provided in energy balance, we assessed the energy  
3 density of both diets using blinded bomb calorimetry measurements on four samples per diet  
4 (C200 calorimeter, IKA-Werke GmbH & Co. Kg., Staufen, Germany). Since the energy density  
5 was on average slightly higher for the cholesterol-supplemented diet than for the regular dry food  
6 (i.e. 22.40 vs. 21.70 kJ/g), we fed larvae on slightly more regular dry food with and without  
7 treatment with diethyl ether (5.2mg and 15.5mg/feeding/tank for normal and overfeeding) than  
8 cholesterol-supplemented diet (5mg and 15mg/feeding/tank).

9 At 10dpf, larvae were subject to optical screening of atherogenic traits (see '*Imaging*'),  
10 followed by assessment of whole-body lipid and glucose levels (see '*Lipid, glucose and protein*  
11 *quantification*'). To reach a sample size of ~100 larvae per background per dietary condition, we  
12 repeated the experimental procedure 5-9 times per background (total 27 times). To avoid batch  
13 effects, all dietary conditions were included on each occasion, and we adjusted for batch in the  
14 statistical analysis. To avoid bias by the time of imaging, the six dietary conditions were imaged  
15 in a randomized manner across imaging days, and time of imaging was recorded for each larva  
16 and adjusted for in the statistical analysis.

#### 17 **4 Treatment with atorvastatin and ezetimibe**

18 Combined treatment with atorvastatin and ezetimibe is a widely-used strategy to lower LDLc – as  
19 well as other key atherogenic parameters – in patients with hypercholesterolemia<sup>70-72</sup>. Results  
20 from small-scale studies in samples of 20 to 100 pooled larvae suggest that treating larvae fed on  
21 a cholesterol-supplemented diet with statins and/or ezetimibe may prevent the elevated whole-  
22 body LDLc and/or total cholesterol levels that are otherwise observed<sup>38,39</sup>. In addition, evidence  
23 suggests that treatment with atorvastatin and ezetimibe may reduce vascular lipid deposition<sup>39,73</sup>.

1 To examine the anti-atherogenic potential of combined treatment with atorvastatin and  
2 ezetimibe, we overfed larvae of three backgrounds on a cholesterol-supplemented diet – as  
3 described earlier – in the presence or absence of 6µg atorvastatin and 80µg ezetimibe per 1g of  
4 dry food<sup>73</sup> from 5 to 9dpf. At 10dpf, larvae were optically screened for atherogenic traits (see  
5 ‘*Imaging*’) and used for enzymatic assessment of whole-body lipid and glucose levels (see ‘*Lipid,*  
6 *glucose and protein quantification*’). To reach a sample size of 100 to 200 larvae per background  
7 per condition (treated vs. untreated), we repeated the experimental procedure 3 to 4 times across  
8 the three backgrounds (total 10 times). To avoid batch effects, treated and untreated larvae were  
9 included on each occasion. To avoid bias by the time of imaging, both conditions were alternated  
10 during imaging and time of imaging was recorded for each larva.

11

## 12 **5 Food intake**

13 To examine if supplementation of food with extra cholesterol and/or atorvastatin and ezetimibe  
14 affect food intake, we examined food intake in 204 additional larvae that were overfed on: 1)  
15 standard dry food; 2) standard dry food supplemented with 4% extra cholesterol using diethyl  
16 ether; 3) standard dry food treated with diethyl ether without cholesterol supplementation; or 4)  
17 standard dry food supplemented with 4% extra cholesterol using diethyl ether and further  
18 enrichment with atorvastatin and ezetimibe. Larvae were overfed on one of the four diets from 5  
19 to 7dpf as described earlier. Before the morning feeding of 8dpf, larvae were transferred to fresh  
20 water before feeding them on diet that had (additionally) been supplemented with a fluorescent  
21 tracer. The fluorescently labelled diet was prepared as described previously<sup>74</sup>. Briefly, 75µl of  
22 yellow-green 2.0 µm polystyrene microspheres (FluoSpheres carboxylate-modified microspheres,  
23 Invitrogen, Carlsbad, CA, USA), supplied as a 2% solution, were mixed with 50 mg of food and  
24 25µl of deionized water for each of the four diets. The mixture was left to dry overnight in the



1 dark and crashed into fine powder the next day. We subsequently acquired Z-stacks of the  
2 gastrointestinal tract (30 images, 1.5µm apart) between 20 mins and 5 hours after the morning  
3 feeding (**Supplementary Fig. 4**). Two rounds of imaging were performed to reach the final  
4 sample size. With the exception of atorvastatin and ezetimibe (2<sup>nd</sup> round only), all conditions  
5 were included in both rounds to avoid batch effects. To avoid bias by the time of imaging,  
6 conditions were alternated during imaging – consistently imaging two consecutive larvae per  
7 condition – and time of imaging was recorded for each larva to allow for statistical adjustment.

## 8 **6 Genetic interventions**

9 A rich body of literature supports the role of *APOE*, *APOB*, and *LDLR* in familial  
10 hypercholesterolemia and CAD<sup>15-17</sup>. To examine if zebrafish can be used for high-throughput  
11 screening of candidate genes for dyslipidemia, atherosclerosis and CAD, we performed a  
12 multiplexed, CRISPR-Cas9-based genetic intervention for these genes using the protocol  
13 described by Varshney et al.<sup>28</sup>.

14 The zebrafish can have multiple orthologues of any human gene, thanks to a duplication of the  
15 genome early in the evolution of teleost fish. Hence, we firstly identified two zebrafish  
16 orthologues for *APOE*, three for *APOB* and two for *LDLR* using Ensembl, a synteny search in  
17 Genomicus<sup>75</sup>, and a literature search<sup>58</sup> (**Supplementary Table 10**). We then designed CRISPR  
18 guide RNAs (gRNAs) to target these zebrafish orthologues – aiming for an early exon – using  
19 chopchop<sup>76</sup> and CRISPRscan<sup>77</sup>, and tested their efficiency by micro-injecting gRNAs and Cas9  
20 into the cell at the single-cell stage in multiplex. Eight larvae per multiplex were sacrificed at  
21 3dpf and used for fragment length PCR analysis, to establish the efficiency of the gRNAs. For  
22 each orthologue, we selected a gRNA that showed moderate to high mutagenic efficiency, i.e.  
23 additional peaks in the fragment length spectrum in at least four of the eight larvae, while also

1 retaining the wildtype peak (**Supplementary Table 11**). Pilot experiments in our lab indicated  
2 this approach can be anticipated to yield an adequate number of homozygous mutants for each  
3 orthologue in the F<sub>1</sub> generation.

4 Identifying a gRNA with moderate to high mutagenic efficiency on average required six  
5 attempts for the seven orthologues (range 2 to 10) (**Supplementary Table 11**). The seven  
6 selected gRNAs for orthologues of *APOE*, *APOB*, and *LDLR* – one per orthologue – were  
7 subsequently co-injected in the cell of fertilized eggs from *Tg(mpeg1-mCherry; mpo-EGFP)*  
8 parents at the single-cell stage. Founder mutants were optically screened for the presence of the  
9 *Tg:mpeg1-mCherry* and *Tg:mpo-EGFP* transgenes at 4dpf, and carriers were raised to maturity.  
10 Founder mutants were then in-crossed, and offspring (F<sub>1</sub>) were overfed on a cholesterol-  
11 supplemented diet from 5 to 9dpf, followed by optical screening for atherogenic traits at 10dpf  
12 (see ‘*Imaging*’) and enzymatic assessment of whole-body LDLc, HDLc, triglyceride, total  
13 cholesterol, and glucose levels (see ‘*Lipid, glucose and protein quantification*’). DNA was then  
14 extracted and larvae were paired-end sequenced for the CRISPR-targeted sites (see ‘*DNA*  
15 *extraction and paired-end sequencing*’). To reach a sample size of 384 larvae per multiplex and  
16 background, we repeated the experimental procedure eight times. This sample size allows  
17 automated downstream sample preparation for paired-end sequencing in multiplex (see ‘*DNA*  
18 *extraction, sample preparation and paired-end sequencing*’).

19 The procedure described for the proof-of-concept genetic intervention was repeated for four  
20 DEPICT<sup>50</sup>-identified candidate genes in triglyceride-associated loci<sup>42</sup>, i.e. *LPAR2*, *TM6SF2*,  
21 *GATAD2A* and *GMIP*. Together, these four genes have six orthologues in zebrafish  
22 (**Supplementary Table 29**), and identifying moderate or highly active gRNAs on average  
23 required two attempts (range 2 to 4) (**Supplementary Table 30**). Phenotypically characterizing

1 384 larvae for the multiplexed mutant line with six targeted candidate genes required repeating  
2 the experiment four times.

### 3 **7** *Experimental procedure*

#### 4 **7.1** *Imaging*

5 On the morning of 10dpf – before the usual morning feeding – all tanks were blinded for dietary  
6 or drug treatment condition (not applicable to the genetic interventions) to ensure unbiased  
7 imaging, annotation, and quality control of images (see ‘*Image quantification*’). Immediately  
8 before imaging each tank, 15 to 20 larvae were simultaneously soaked in 25 $\mu$ M MDH in PBS for  
9 30 mins, to enable visualization of circulating lipids and vascular lipid deposition. After soaking  
10 in MDH, the larvae were placed in a petri dish and anesthetized using tricaine (0.04 mg/ml).  
11 Larvae were subsequently aspirated one-by-one using a Vertebrate Automated Screening  
12 Technology (VAST) BioImager (Union Biometrica Inc, Geel, Belgium)<sup>40,41</sup>, which was mounted  
13 on the stage of a Leica DM6000B LED automated upright fluorescence microscope (MicroMedic  
14 AB, Stockholm, Sweden). The VAST BioImager automatically loads and positions larvae into a  
15 borosilicate capillary, where they are detected by the system’s camera. Whole-body images  
16 (n=12) were acquired during one full rotation, followed by automated rotation to the lateral  
17 orientation, as pre-specified using template images. The VAST BioImager subsequently  
18 positioned the larva so the caudal vein and dorsal aorta immediately caudal of the rectum were  
19 located within the field of view of the microscope (i.e. ~2.9 mm from the tip of the nose), and  
20 triggered the microscope to start imaging. The researcher then manually focused on the center of  
21 the vasculature in z using the MDH channel, followed by the automated acquisition of 17 optical  
22 sections above, and 17 below the focal point – one every 1.5 $\mu$ m – using a Leica dip-in objective  
23 with 20X magnification (Leica OBJ HCX APO L 20X/0.50 W). This procedure was

1 automatically repeated for each of the up-to-three channels per larva – i.e. to visualize the MDH  
2 dye as well as the *EGFP*- and *mCherry*-labelled transgenes – using the Leica 405, L5, and TXR  
3 filters, respectively. For each channel, the fluorescence signal was recorded using a Leica  
4 DFC365 FX CCD camera. Upon completion of optical sectioning in all channels, the larva was  
5 dispensed into a 96-well plate for further processing, and the next larva was loaded for imaging.  
6 This procedure takes up to 2 mins per larva.

### 7 **7.2.1 *Quantification of morphological features in zebrafish larvae***

8 Whole-body images of larvae acquired by the bright field camera of the VAST BioImager were  
9 used to quantify body length, dorsal and lateral body surface area, and body volume. To  
10 distinguish the larva from the capillary in which it was positioned, the capillary was assumed to  
11 be horizontal and the position of the capillary was obtained by projecting all pixel intensity  
12 values to the y-axis. That is, for each y-level, the sum of all pixels on that level in x was  
13 computed (**Fig. 1a**). The edges of the capillary appeared as minima of the projection, and the  
14 position of the inner walls were defined as the inner slopes of those minima with the steepest  
15 angle, i.e. the highest absolute derivative. Once the region inside the capillary was defined, larvae  
16 were segmented from the image background using grey-level thresholding based on optimized  
17 precision with regards to a given size interval<sup>78</sup>. This method efficiently tries all possible  
18 threshold levels and selects the threshold level that maximizes the per-threshold-precision (true  
19 positive / (true positive + false positive), where true positive is defined as the number of pixels in  
20 objects within the size interval and false positive is defined as the number of pixels in objects  
21 outside the size interval. This pre-processing was performed in ImageJ. Holes within the binary  
22 mask were filled automatically using CellProfiler<sup>79</sup>, and the largest connected component was  
23 extracted as the final segmentation. The dorsal and lateral surface area of the larva was computed

1 as the number of pixels in this final mask, and the body length was estimated as the largest  
2 distance between two points on the larva outline touching a bounding box in the dorsal  
3 orientation (**Fig. 1a**).

4 Fluorescence signals from MDH (lipids), *mCherry* (macrophages) and *EGFP* (neutrophils,  
5 oxLDL, endothelial cells) were quantified using custom-written scripts in ImageJ, CellProfiler  
6 and ilastik<sup>80</sup>. Firstly, the maximal projection of each fluorescent channel was computed across all  
7 optical sections in z using ImageJ, to yield a single image containing signal (and noise) from  
8 multiple focal depths. Next, CellProfiler was used to quantify the surface area for each  
9 fluorescence signal across the z-stack. Images were first cropped in y using the MDH signal to  
10 only include the region from the center of the dorsal aorta to immediately caudal of the caudal  
11 vein. The fluorescence signal was then separated from background and noise using an ilastik-  
12 based, lenient pixel classifier that takes fluorescence intensity into account. Further segmentation  
13 was performed using a CellProfilerAnalyst-based object classifier in which criteria based on area,  
14 shape, texture and intensity were summarized in ten rules (see ‘*code availability*’). Subsequent  
15 feature extraction in which the surface area and shape of each identified object were quantified  
16 provided the total number of objects and the surface area covered by those objects. In addition,  
17 we created a mask to quantify two-way co-localization of MDH-stained lipid deposits or oxLDL  
18 with macrophages and neutrophils. Similarly, the proportion of lipid deposits that was located  
19 inside the vascular endothelium was calculated by creating a mask for the lipid deposits on top of  
20 the segmented vascular endothelial cells. Lipid deposits that overlapped with the endothelial cell  
21 layer and/or circulating lipids were considered to reside inside the endothelium; a requirement for  
22 atherogenic lipid deposits.

23 Food intake was quantified in the acquired images by first computing maximal projection of  
24 the acquired z-stacks using ImageJ<sup>81</sup>, to yield a single image containing signal (and noise) from

1 multiple focal depths. Next, grey-level thresholding was applied in CellProfiler to quantify the  
2 total surface area of the fluorescence signal.

3 All procedures have been incorporated in pipelines that can be run in an automated manner on  
4 at least 2000 images simultaneously.

### 5 **7.2.2 Sensitivity and specificity for vascular lipid deposition**

6 Accurate identification and quantification of vascular lipid deposits in an automated manner is  
7 challenging, since the MDH dye stains both vascular lipid deposits and circulating lipids. To  
8 ensure adequate detection of vascular lipid deposits, we calculated the sensitivity and specificity  
9 of the image quantification pipeline. To this end, researchers MKB and MdH manually annotated  
10 vascular lipid deposits in 30 randomly selected images from the *Tg:mpeg1-mCherry; mpo-EGFP*  
11 background across the six dietary conditions (blinded) in 3D using the acquired z-stacks. These  
12 6x30 images had not been used to train the pixel and object classifiers. MKB and MdH  
13 subsequently discussed the results of the manual annotation process, and resolved discrepancies  
14 in judgment where needed. The results of the manual annotation process (gold standard) were  
15 then compared with the projections generated by the image quantification pipeline, in which the  
16 lipid deposits identified by both pixel and object classifier had been highlighted. Doing so  
17 allowed us to quantify the number of true positive (TP), false positive (FP) and false negative  
18 (FN) lipid deposits. The average sensitivity and specificity of the image quantification pipeline  
19 across the six dietary conditions were 72% and 93%, respectively (calculated using Stata's  
20 'diagti').

### 21 **7.3 Lipid, glucose and protein profiling**

22 After imaging was completed, the anesthetized larvae were euthanized by exposure to tricaine  
23 (MS-222, Sigma, Sweden) and ice. All excess liquid was removed from the well, and one 1.4mm

1 zirconium bead (Diagnostics, NJ, USA) and 75 $\mu$ l ice-cold PBS 1X were added to each well. The  
2 tissue was subsequently homogenized for 2 mins at 1000 rpm (1600 MiniG-Automated  
3 homogenizer, Gammadata Instruments, Uppsala, Sweden) and centrifuged at 3500 rpm for 5  
4 mins at 4°C (13,000 rpm when using tubes). After centrifugation, 12.5 $\mu$ l of supernatant was  
5 removed and added to a new 96-well plate for protein quantification, together with 12.5 $\mu$ l of ice-  
6 cold PBS per well. The remaining supernatant (~60 $\mu$ l/well) was transferred to Eppendorf tubes,  
7 together with 160 $\mu$ l of ice-cold PBS 1X (to a total volume of 220 $\mu$ l/well), and stored at -80°C for  
8 profiling of LDLc, HDLc, triglyceride, total cholesterol and glucose levels. Samples were  
9 subsequently stored at -80°C prior to analysis.

10 Protein content was assessed using the Pierce bicinchoninic acid (BCA) Protein Assay Kit  
11 (Thermo Fisher Scientific, Waltham, MA, USA) and a Varioscan LUX Microplate Reader  
12 (Thermo Fisher Scientific, Waltham, MA USA). LDLc, HDLc, triglyceride, total cholesterol and  
13 glucose levels were quantified using a fully automated Mindray TM BS-380 analyzer (Mindray  
14 Medical International, Shenzhen, China) using direct LDLc (1E31), HDLc (3K33), triglyceride  
15 (7D74), cholesterol (7D62), and glucose (3L82) reagents from Abott Laboratories (Abott Park,  
16 IL, USA). All analyses were blinded to dietary or treatment condition or genotype, respectively.

#### 17 ***7.4.1 DNA extraction, sample preparation and paired-end sequencing***

18 For larvae that were part of the genetic intervention, the pellet that remained after lipid, glucose  
19 and protein profiling was used to extract DNA. To this end, 50 $\mu$ l of lysis buffer containing  
20 proteinase K (diluted 1:100) was added to each well, followed by incubation at 55°C for 2h, and  
21 incubation at 95°C for 10 mins to heat-inactivate the proteinase K. Samples were then  
22 centrifuged at 3500 rpm for 2 mins and the supernatant was transferred to a new 96-well plate. A  
23 two-step PCR reaction subsequently incorporated Illumina Nextera XT v2 indices into the PCR

1 products (Illumina Inc, San Diego, CA) using a Hamilton Nimbus 96 liquid handling system  
2 (Hamilton Robotics AB, Kista, Sweden), followed by paired-end sequencing (2x250 bp) on a  
3 MiSeq (Illumina Inc, San Diego, CA) at the National Genomics Infrastructure (NGI) Sweden.  
4 This procedure allows us to combine samples from up to eight 384-well plates – i.e. 8x384 larvae  
5 with 8x8 different target sites – in a single sequencing lane while retaining >100X coverage, on  
6 average. The combination of sequence and indices allows post-sequencing linking of reads to  
7 individual larvae (see ‘post-sequencing data analysis’).

#### 8 **7.4.2 *Post-sequencing data analysis***

9 The MiSeq generated two de-multiplexed, paired-end .fastq files per larva (2x250 bp). A custom-  
10 written Perl script was used to split the reads into separate .fastq files for each CRISPR-Cas9  
11 targeted site, and remove the insert sequences from the .fastq files. The paired-end sequences  
12 were processed at the same time, extracting the sequence in between the two primers if both  
13 primers were present in the read, or the sequence downstream of the first primer if only the first  
14 primer was observed (to prevent excluding longer reads *a priori*). No mismatches in the primer(s)  
15 were allowed to ensure optimal data quality. We subsequently used the fast and accurate Illumina  
16 Paired-End read mergeR (PEAR)<sup>82</sup> to merge the trimmed paired-end reads; FastX version  
17 0.0.14<sup>83</sup> to remove reads containing bases with a quality score below 20 (-q 20, -p 100); and  
18 Spliced Transcripts Alignment to a Reference (STAR) version 2.4.1c<sup>84</sup> to map the reads to the  
19 reference genome (Danio\_rerio.GRCz11.dna.toplevel.fa as downloaded from Ensembl).  
20 SAMtools version 0.1.19<sup>85</sup> was used to convert files from SAM to BAM format and sort and  
21 index BAM files, as well as to generate a summary of the coverage of mapped reads on a  
22 reference sequence at a single bp resolution (using the ‘mpileup’ utility).



1 A custom-written variant calling algorithm in R (DIVaH - Danio rerio Identification of  
2 Variants by Haplotype) was used to identify the two most prominent reads per larva and target  
3 site that passed quality control. That is, reads with a length difference compared with the  
4 reference sequence of less than 170 bp, and with an alignment report string (Concise  
5 Idiosyncratic Gapped Alignment Report [CIGAR]) shorter than 50 characters (**Supplementary**  
6 **Tables 12 and 31**). Variants located within 30 bp of the CRISPR target site were subsequently  
7 functionally annotated using Ensembl's variant effect predictor (VEP) (**Supplementary Tables**  
8 **13 and 32**). At each larva, target site and allele, the variant with the highest predicted likelihood  
9 of functionally affecting protein function was retained. Allele-specific scores (no annotation=0;  
10 modifier=0.2; low=0.33; moderate=0.66; high=1) were then calculated, and summing across the  
11 two alleles yielded an orthologue-specific dosage score for each targeted site (i.e. orthologue) in  
12 each larva.

13 In the proof-of-concept genetic screen, a median of 18 unique CRISPR-Cas9 induced  
14 mutations with a predicted detrimental effect on protein function were observed across the seven  
15 targeted orthologues in offspring of founder mutants (interquartile range 16 to 24.5 mutations,  
16 **Supplementary Table 13**). Of the 138 unique mutations identified across the seven target sites,  
17 54 were frameshift deletions (40.0%), nine introduced a premature stop codon, and 34 were  
18 missense variants (24.6%). VEP predicted that of the 138 unique mutations, 18 were modifiers  
19 (13.0%), while four, 51 and 65 were assigned a low, moderate or high likelihood of affecting  
20 protein function (2.9%, 37.0% and 47.1%, respectively, **Supplementary Table 13**). The mutant  
21 allele frequency across the seven targeted zebrafish orthologues was typically high in the F<sub>1</sub>  
22 generation (median 0.88, interquartile range 0.52 to 0.98, **Supplementary Table 14**).

23 In the discovery screen for candidate genes in the triglyceride, LDLc, total cholesterol and  
24 type-2 diabetes-associated locus on chr 19p13.11, three, one and seven unique CRISPR-Cas9

1 induced mutations with a predicted detrimental effect on protein function were observed in  
2 *lpar2a*, *lpar2b* and *gatad2ab* in offspring of founder mutants (**Supplementary Table 32**). All  
3 larvae were wildtype for the zebrafish orthologues of *TM6SF2* and *GMIP*, in spite of having pre-  
4 tested the CRISPR gRNAs for efficiency. Of the 11 unique mutations identified across *lpar2a*,  
5 *lpar2b* and *gatad2ab*, four were frameshift deletions (36.4%), four were inframe deletions  
6 (36.4%), and three were missense variants (27.3%, **Supplementary Table 32**). In addition to all  
7 F<sub>1</sub> larvae being wildtype for three of the six targeted orthologues, the mutant allele frequency was  
8 very low across *lpar2a*, *lpar2b* and *gatad2ab*, with only 11, 6 and 18 of the 376 successfully  
9 sequenced larvae carrying one mutated allele. None of the larvae carried a mutated allele in more  
10 than one gene (**Supplementary Table 33**).

## 11 8 *Quality control*

12 After image quantification and before the statistical analysis, all quantified images were manually  
13 screened to ensure adequate quantification had occurred. Larvae for which the automated  
14 quantification pipeline had failed for a trait were annotated and excluded from the analysis for  
15 that trait, as well as for any traits that rely on adequate quantification of that trait. Annotations  
16 include: weak staining of the circulation by MDH (possibly reflecting low levels of circulating  
17 lipids), resulting in incorrect segmentation of the region of interest; inadequate segmentation of  
18 the region of interest for other reasons, like movement during imaging; more than 20% of true  
19 negative objects being detected as objects (i.e. many false positives); less than 20% of true  
20 objects being detected (i.e. many false negatives); and circulating neutrophils being present,  
21 resulting in the same neutrophil being quantified multiple times (**Supplementary Table 1**).  
22 Annotations that resulted in the exclusion of at least ten larvae were examined in more detail, to  
23 examine if the underlying reason for exclusion may have influenced the results (see below).

1 Based on the large proportion of affected larvae and the absence of influence on the results,  
2 larvae with many false positive or many false negative oxLDL deposits were included in the  
3 analysis.

4 In the dietary and drug treatment interventions, all continuous outcomes and exposures outside  
5 the mean  $\pm 5 \times$ SD (standard deviation) range were set to missing before the association analysis,  
6 to prevent outliers – be it biological or methodological – from driving the results. This step was  
7 omitted in the genetic interventions because larvae carrying two mutated alleles for causal genes  
8 were *a priori* anticipated to show extreme phenotypes. In addition, total cholesterol levels were  
9 set to missing if triglyceride levels were missing and vice versa. This resulted in the exclusion of  
10 images from a median of 2.5 larvae across all outcomes in the dietary intervention (inter quartile  
11 range 2.5 to 7), and one larva in the drug treatment intervention (interquartile range 0 to 2.75).  
12 Next, residuals were calculated to normalize: 1) vascular endothelial surface area for the surface  
13 area of circulating lipids, yielding a variable that reflects endothelial thickness; 2) LDLc, HDLc,  
14 triglyceride, total cholesterol and glucose levels for protein content of the sample; and 3) dorsal  
15 and lateral body surface area as well as body volume for body length. All analyses with these  
16 variables as outcomes or exposures were performed using normalized values. Finally, all  
17 continuous outcomes showing an approximately normal distribution were inverse-normally  
18 transformed to a mean of 0 and standard deviation (SD) of 1, to ensure all residuals in the  
19 association analyses were normally distributed. This transformation implies that all effect sizes  
20 ( $\beta$ ), standard errors (SE) and 95% confidence intervals (95% CI) for these outcomes can be  
21 interpreted as z-scores, allowing a comparison of effect sizes across outcomes, conditions and  
22 experiments. Image-based vascular atherogenic outcomes that showed a negative binomial  
23 distribution – with or without inflation of zeros –were not inverse-normally transformed.

## 1    **9**        *Statistical analysis*

2    In the main analysis, we examined the effect of: 1) overfeeding and cholesterol supplementation  
3    (in the dietary intervention); 2) treatment with atorvastatin and ezetimibe (in the drug treatment  
4    intervention); and 3) mutations in proof-of-concept and candidate genes (in the genetic  
5    interventions) on body size; early-stage vascular atherogenic traits; and whole-body LDLc,  
6    HDLc, triglyceride, total cholesterol and glucose levels. This was accomplished using  
7    hierarchical linear models (xtmixed in Stata) or negative binomial regression (nbreg).  
8    Hierarchical linear models on inverse-normally transformed outcomes provide effect sizes and  
9    standard errors for the fixed factors, while providing the standard deviation of the outcome across  
10   random factors, for which the intercept – i.e. the value of non-exposed larvae – is allowed to  
11   vary. Body size, whole-body lipid and glucose levels, and some image-based atherogenic traits  
12   were analyzed this way, i.e. typically vascular infiltration by macrophages or neutrophils.  
13   However, most image-based vascular atherogenic traits showed negative binomial distributions.  
14   For such traits, the effects of dietary, drug treatment and genetic factors were examined using  
15   negative binomial regression.

16        All models were adjusted for: a) the use of diethyl ether (in the dietary intervention); and b)  
17   time of day at which the image was acquired (in all experiments) as fixed factors (xtmixed) or as  
18   regular co-variables (nbreg). Models were additionally adjusted for transgenic background and  
19   batch as random factors or as regular co-variables. For image-based vascular atherogenic traits,  
20   associations were examined with and without adjusting for body length and dorsal body surface  
21   area, by adding them as fixed factors or co-variables to the models. To ensure unbiased estimates,  
22   we only included data from larvae with information on body length and dorsal body surface area  
23   in the adjusted and unadjusted analyses, to ensure that effect estimates were based on data from  
24   the same larvae. This step was omitted in the genetic interventions to maximize the sample size

1 of the analysis that was not adjusted for body size. For image-based atherogenic traits, we also  
2 examined if LDLc, HDLc, triglyceride, and/or glucose levels mediated the main effect of dietary,  
3 drug treatment and genetic factors, by adding them as additional fixed factors or co-variables to  
4 the size-adjusted model. The sample size was typically somewhat lower for the latter analyses  
5 due to missing data. Directed acyclic graphs (DAGs) indicated that based on the anticipated  
6 causal paths, this analysis plan should not have resulted in biased effect estimates. For image-  
7 based atherogenic traits, results from models that were additionally adjusted for body size were  
8 considered the main results, and are referred to throughout the results and figures.

9 A small subset of larvae with suboptimal image or image quantification quality were excluded  
10 from the analyses (**Supplementary Table 2**). To examine if exclusion of these larvae may have  
11 influenced the results, we examined if the odds of being affected was associated with the main  
12 exposures, i.e. diet, drug treatment or mutations. These analyses were performed using logistic  
13 regression models for annotations that affected at least ten larvae.

14 For all analyses, effect sizes, standard errors (robust standard errors for nbreg) and 95%  
15 confidence intervals are reported for the exposed compared with the unexposed group. Odds  
16 ratios (OR) and 95% confidence intervals are provided for analyses of image-based exclusions.  
17 All data management and statistical analyses were performed using Stata/MP 14.0 for Mac.

## 18 **10 Ethical approval**

19 All procedures were performed in line with Swedish regulations, and all experiments have been  
20 approved by Uppsala Djurförsöksetiska nämnd, Uppsala, Sweden (Permit numbers C142/13 and  
21 C14/16).

## 22 **11 Code availability**

1 All custom-written image analysis scripts; all post-sequencing QC and alignment scripts; the  
2 custom-written variant calling algorithm in R (i.e. DIVaH - Danio rerio Identification of Variants  
3 by Haplotype); and all Stata scripts used for statistical analysis are available from the  
4 corresponding author upon request.

5 **12** *Data availability*

6 The data that support the findings of the current study are available from the corresponding  
7 author upon reasonable request.

## 1 **Acknowledgments**

2 We are very grateful to Stephen A Renshaw from the University of Sheffield, Graham Lieschke  
3 from Monash University, Yury Miller from UCSD, and Dimitris Beis from the Biomedical  
4 Research Foundation Academy of Science for kindly providing us with carriers of the *Tg:mipo-*  
5 *EGFP*, *Tg:mpeg1-mCherry*, *Tg:hsp70:IK17-EGFP* and *Tg:flk-EGFP* transgenes, respectively.  
6 Input from Shawn Burgess and Gaurav Varshney on mutagenesis using CRISPR-Cas9 is also  
7 much appreciated. João Campos Costa's efforts when setting up the lab are gratefully  
8 acknowledged, and we would also like to thank Francis Smet from Union Biometrica Inc and  
9 Thommie Karlsson from Leica for their help with installing the imaging set-up. Pilou Janssens'  
10 work on bomb calorimetry of diets, and Lingjie Tao and Lisa Conrad's help with sample  
11 preparation and pre-screening of larvae are also much appreciated. The computations were  
12 performed on resources provided by SNIC through Uppsala Multidisciplinary Center for  
13 Advanced Computational Science (UPPMAX) under Project SNIC b2015283. The authors would  
14 like to acknowledge support from Science for Life Laboratory, the National Genomics  
15 Infrastructure (NGI) and UPPMAX for aiding in massive parallel sequencing and computational  
16 infrastructure. Support from the National Bioinformatics Infrastructure Sweden (NBIS) is also  
17 gratefully acknowledged, and constructive discussions with the Genome Engineering Zebrafish  
18 (GEZ) facility are appreciated. Data on coronary artery disease / myocardial infarction have been  
19 contributed by the CARDIoGRAMplusC4D and UK Biobank CardioMetabolic Consortium CHD  
20 working group who used the UK Biobank Resource (application number 9922). Data have been  
21 downloaded from [www.CARDIOGRAMPLUSC4D.ORG](http://www.CARDIOGRAMPLUSC4D.ORG).

22 MdH is a fellow of the Swedish Heart-Lung Foundation (20170872) and a Kjell and Märta  
23 Beijer Foundation researcher. This research was supported by project grants from the Swedish  
24 Heart-Lung Foundation (20140543, 20170678, 20180706), the Swedish Research Council (2015-

- 1 03657), the Knut och Alice Wallenberg Foundation (2013.0126), the European Research Council
- 2 (ERC-StG-335395) and NIH (R01DK106236, R01DK107786, U01DK105554).



1 **Author contributions**

2 MKB, EI and MdH conceived the study; EI and MdH ascertained funding and provided  
3 material support; MKB, AE, BvdH, EM, MMM, TK and MdH performed the experiments;  
4 MKB, PR, CW and MdH generated the image quantification pipelines and performed the  
5 image-based analysis; MKB, AE, BvdH, TK and MdH optimized the CRISPR-Cas9 multiplex  
6 pipeline; EM, OD and MDH generated the post NGS QC and variant calling pipeline; AL  
7 assessed whole-body lipid and glucose levels; HLB and MdH performed the statistical  
8 analysis; MKB and MdH wrote the manuscript; all authors provided critical feedback to the  
9 manuscript.

1 **Competing Financial Interests statement**

- 2 None of the authors have a competing financial interest to declare. Funding bodies did not  
3 influence the results of the study.

## 1 **References**

- 2 1. Lusis, A. J. Atherosclerosis. *Nature* **407**, 233 (2000).
- 3 2. Ross, R. Atherosclerosis--an inflammatory disease. *N. Engl. J. Med.* **340**, 115–26 (1999).
- 4 3. Ross, R. & Glomset, J. A. Atherosclerosis and the arterial smooth muscle cell:  
5 Proliferation of smooth muscle is a key event in the genesis of the lesions of  
6 atherosclerosis. *Science* **180**, 1332–9 (1973).
- 7 4. Badrnya, S., Butler, L. M., Söderberg-Naucler, C., Volf, I. & Assinger, A. Platelets  
8 directly enhance neutrophil transmigration in response to oxidised low-density lipoprotein.  
9 *Thromb. Haemost.* **108**, 719–729 (2012).
- 10 5. Watson, A. D. *et al.* Structural identification by mass spectrometry of oxidized  
11 phospholipids in minimally oxidized low density lipoprotein that induce  
12 monocyte/endothelial interactions and evidence for their presence in vivo. *J. Biol. Chem.*  
13 **272**, 13597–607 (1997).
- 14 6. Adiguzel, E., Ahmad, P. J., Franco, C. & Bendeck, M. P. Collagens in the progression and  
15 complications of atherosclerosis. *Vasc. Med.* **14**, 73–89 (2009).
- 16 7. Kannel, W. B. Some lessons in cardiovascular epidemiology from Framingham. *Am. J.*  
17 *Cardiol.* **37**, 269–282 (1976).
- 18 8. O’Gara, P. T. *et al.* 2013 ACCF/AHA Guideline for the Management of ST-Elevation  
19 Myocardial Infarction. *J. Am. Coll. Cardiol.* **61**, e78–e140 (2013).
- 20 9. Jneid, H. *et al.* 2012 ACCF/AHA Focused Update of the Guideline for the Management of  
21 Patients With Unstable Angina/Non–ST-Elevation Myocardial Infarction (Updating the  
22 2007 Guideline and Replacing the 2011 Focused Update). *J. Am. Coll. Cardiol.* **60**, 645–  
23 681 (2012).
- 24 10. Ibanez, B. *et al.* 2017 ESC Guidelines for the management of acute myocardial infarction

- 1 in patients presenting with ST-segment elevation. *Eur. Heart J.* **39**, 119–177 (2018).
- 2 11. GBD 2016 Causes of Death Collaborators, M. *et al.* Global, regional, and national age-sex  
3 specific mortality for 264 causes of death, 1980–2016: a systematic analysis for the Global  
4 Burden of Disease Study 2016. *Lancet (London, England)* **390**, 1151–1210 (2017).
- 5 12. Nelson, C. P. *et al.* Association analyses based on false discovery rate implicate new loci  
6 for coronary artery disease. *Nat. Genet.* **49**, 1385–1391 (2017).
- 7 13. Miller, C. L. *et al.* Integrative functional genomics identifies regulatory mechanisms at  
8 coronary artery disease loci. *Nat. Commun.* **7**, (2016).
- 9 14. Klarin, D. *et al.* Genetics of blood lipids among ~300,000 multi-ethnic participants of the  
10 Million Veteran Program. *Nat. Genet.* **50**, 1514–1523 (2018).
- 11 15. Beisiegel, U., Weber, W., Ihrke, G., Herz, J. & Stanley, K. K. The LDL–receptor–related  
12 protein, LRP, is an apolipoprotein E-binding protein. *Nature* **341**, 162–164 (1989).
- 13 16. Zimmermann, T. S. *et al.* RNAi-mediated gene silencing in non-human primates. *Nature*  
14 **441**, 111–114 (2006).
- 15 17. Brown, Michael S., Goldstein, J. L. The Nobel Prize in Physiology and Medicine. (1985).
- 16 18. Jarcho, J. A. & Keaney, J. F. Proof That Lower Is Better — LDL Cholesterol and  
17 IMPROVE-IT. *N. Engl. J. Med.* **372**, 2448–2450 (2015).
- 18 19. Garcia-Calvo, M. *et al.* The target of ezetimibe is Niemann-Pick C1-Like 1 (NPC1L1).  
19 *Proc. Natl. Acad. Sci.* **102**, 8132–8137 (2005).
- 20 20. Sabatine, M. S. *et al.* Efficacy and Safety of Evolocumab in Reducing Lipids and  
21 Cardiovascular Events. *N. Engl. J. Med.* **372**, 1500–1509 (2015).
- 22 21. Fitzgerald, K. *et al.* Effect of an RNA interference drug on the synthesis of proprotein  
23 convertase subtilisin/kexin type 9 (PCSK9) and the concentration of serum LDL  
24 cholesterol in healthy volunteers: a randomised, single-blind, placebo-controlled, phase 1

- 1 trial. *Lancet (London, England)* **383**, 60–68 (2014).
- 2 22. Dadu, R. T. & Ballantyne, C. M. Lipid lowering with PCSK9 inhibitors. *Nat. Rev. Cardiol.*  
3 **11**, 563–75 (2014).
- 4 23. Plump, A. S. *et al.* Severe hypercholesterolemia and atherosclerosis in apolipoprotein E-  
5 deficient mice created by homologous recombination in ES cells. *Cell* **71**, 343–53 (1992).
- 6 24. Powell-Braxton, L. *et al.* A mouse model of human familial hypercholesterolemia:  
7 markedly elevated low density lipoprotein cholesterol levels and severe atherosclerosis on  
8 a low-fat chow diet. *Nat. Med.* **4**, 934–8 (1998).
- 9 25. Hogarth, C. A., Roy, A. & Ebert, D. L. Genomic evidence for the absence of a functional  
10 cholesteryl ester transfer protein gene in mice and rats. *Comp. Biochem. Physiol. B.*  
11 *Biochem. Mol. Biol.* **135**, 219–29 (2003).
- 12 26. Lieschke, G. J. & Currie, P. D. Animal models of human disease: Zebrafish swim into  
13 view. *Nat. Rev. Genet.* **8**, 353–367 (2007).
- 14 27. Vilella, A. J. *et al.* EnsemblCompara GeneTrees: Complete, duplication-aware  
15 phylogenetic trees in vertebrates. *Genome Res.* **19**, 327–35 (2009).
- 16 28. Varshney, G. K. *et al.* A high-throughput functional genomics workflow based on  
17 CRISPR/Cas9-mediated targeted mutagenesis in zebrafish. *Nat. Protoc.* **11**, 2357–2375  
18 (2016).
- 19 29. Spandl, J., White, D. J., Peychl, J. & Thiele, C. Live cell multicolor imaging of lipid  
20 droplets with a new dye, LD540. *Traffic* **10**, 1579–84 (2009).
- 21 30. Yang, H.-J., Hsu, C.-L., Yang, J.-Y. & Yang, W. Y. Monodansylpentane as a blue-  
22 fluorescent lipid-droplet marker for multi-color live-cell imaging. *PLoS One* **7**, e32693  
23 (2012).
- 24 31. Flynn, E. J., Trent, C. M. & Rawls, J. F. Ontogeny and nutritional control of adipogenesis

- 1 in zebrafish (*Danio rerio*). *J. Lipid Res.* **50**, 1641–52 (2009).
- 2 32. Fang, L. *et al.* In vivo visualization and attenuation of oxidized lipid accumulation in  
3 hypercholesterolemic zebrafish. *J. Clin. Invest.* **121**, 4861–4869 (2011).
- 4 33. Ellett, F., Pase, L., Hayman, J. W., Andrianopoulos, A. & Lieschke, G. J. mpeg1 promoter  
5 transgenes direct macrophage-lineage expression in zebrafish. *Blood* **117**, e49-56 (2011).
- 6 34. Beis, D. *et al.* Genetic and cellular analyses of zebrafish atrioventricular cushion and valve  
7 development. *Development* **132**, 4193–204 (2005).
- 8 35. Renshaw, S. A. *et al.* A transgenic zebrafish model of neutrophilic inflammation. *Blood*  
9 **108**, 3976–3978 (2006).
- 10 36. Stoletov, K. *et al.* Vascular Lipid Accumulation, Lipoprotein Oxidation, and Macrophage  
11 Lipid Uptake in Hypercholesterolemic Zebrafish. *Circ. Res.* **104**, 952–960 (2009).
- 12 37. Fang, L. *et al.* Oxidized cholesteryl esters and phospholipids in zebrafish larvae fed a high  
13 cholesterol diet: macrophage binding and activation. *J. Biol. Chem.* **285**, 32343–51 (2010).
- 14 38. Baek, J. S., Fang, L., Li, A. C. & Miller, Y. I. Ezetimibe and simvastatin reduce  
15 cholesterol levels in zebrafish larvae fed a high-cholesterol diet. *Cholesterol* **2012**, 564705  
16 (2012).
- 17 39. O’Hare, E. A. *et al.* Disruption of *ldlr* causes increased LDL-c and vascular lipid  
18 accumulation in a zebrafish model of hypercholesterolemia. *J. Lipid Res.* **55**, 2242–53  
19 (2014).
- 20 40. Chang, T.-Y., Pardo-Martin, C., Allalou, A., Wählby, C. & Yanik, M. F. Fully automated  
21 cellular-resolution vertebrate screening platform with parallel animal processing. *Lab Chip*  
22 **12**, 711–716 (2012).
- 23 41. Pardo-Martin, C. *et al.* High-throughput hyperdimensional vertebrate phenotyping. *Nat.*  
24 *Commun.* **4**, (2013).

- 1 42. Willer, C. J. *et al.* Discovery and refinement of loci associated with lipid levels. *Nat.*  
2 *Genet.* **45**, 1274–1285 (2013).
- 3 43. Mahler, A. Blood cholesterol during ether anesthesia. *J Biol Chem* **69**, 653–659 (1926).
- 4 44. Friedewald, W. T., Levy, R. I. & Fredrickson, D. S. Estimation of the Concentration of  
5 Low-Density Lipoprotein Cholesterol in Plasma, Without Use of the Preparative  
6 Ultracentrifuge. *Clin. Chem.* **18**, (1972).
- 7 45. Investigators, T. A.-H. Niacin in Patients with Low HDL Cholesterol Levels Receiving  
8 Intensive Statin Therapy. *N. Engl. J. Med.* **365**, 2255–2267 (2011).
- 9 46. Group, T. H.-T. C. Effects of Extended-Release Niacin with Laropiprant in High-Risk  
10 Patients. *N. Engl. J. Med.* **371**, 203–212 (2014).
- 11 47. Lincoff, A. M. *et al.* Evacetrapib and Cardiovascular Outcomes in High-Risk Vascular  
12 Disease. *N. Engl. J. Med.* **376**, 1933–1942 (2017).
- 13 48. HPS3/TIMI55–REVEAL Collaborative Group *et al.* Effects of Anacetrapib in Patients  
14 with Atherosclerotic Vascular Disease. *N. Engl. J. Med.* **377**, 1217–1227 (2017).
- 15 49. Do, R. *et al.* Common variants associated with plasma triglycerides and risk for coronary  
16 artery disease. *Nat. Genet.* **45**, 1345–1352 (2013).
- 17 50. Pers, T. H. *et al.* Biological interpretation of genome-wide association studies using  
18 predicted gene functions. *Nat. Commun.* **6**, 5890 (2015).
- 19 51. Rosch, P. J. Genes and stress cause coronary atherosclerosis not saturated fat. *Lancet*  
20 *(London, England)* **375**, 1780–1; author reply 1781 (2010).
- 21 52. Rosch, P. J. Stress, cholesterol, and coronary heart disease. *Lancet (London, England)* **2**,  
22 851–2 (1983).
- 23 53. Djoussé, L. & Gaziano, J. M. Dietary cholesterol and coronary artery disease: a systematic  
24 review. *Curr. Atheroscler. Rep.* **11**, 418–22 (2009).

- 1 54. Sattar, N. *et al.* Statins and risk of incident diabetes: a collaborative meta-analysis of  
2 randomised statin trials. *Lancet (London, England)* **375**, 735–42 (2010).
- 3 55. Swerdlow, D. I. *et al.* HMG-coenzyme A reductase inhibition, type 2 diabetes, and  
4 bodyweight: evidence from genetic analysis and randomised trials. *Lancet (London,*  
5 *England)* **385**, 351–61 (2015).
- 6 56. Ference, B. A. *et al.* Variation in *PCSK9* and *HMGCR* and Risk of Cardiovascular Disease  
7 and Diabetes. *N. Engl. J. Med.* **375**, 2144–2153 (2016).
- 8 57. Lotta, L. A. *et al.* Association Between Low-Density Lipoprotein Cholesterol-Lowering  
9 Genetic Variants and Risk of Type 2 Diabetes: A Meta-analysis. *JAMA* **316**, 1383–1391  
10 (2016).
- 11 58. Otis, J. P. *et al.* Zebrafish as a model for apolipoprotein biology: comprehensive  
12 expression analysis and a role for ApoA-IV in regulating food intake. *Dis. Model. Mech.* **8**,  
13 295–309 (2015).
- 14 59. Ley, S. H. *et al.* Association of apolipoprotein B with incident type 2 diabetes in an  
15 aboriginal Canadian population. *Clin. Chem.* **56**, 666–70 (2010).
- 16 60. Lim, H. H. & Kim, O. Y. Association of Serum Apolipoprotein B with the Increased Risk  
17 of Diabetes in Korean Men. *Clin. Nutr. Res.* **5**, 204 (2016).
- 18 61. Liu, C. *et al.* Modeling hypercholesterolemia and vascular lipid accumulation in LDL  
19 receptor mutant zebrafish. *J. Lipid Res.* **59**, 391–399 (2018).
- 20 62. Heymsfield, S. B. *et al.* Evolving concepts on adjusting human resting energy expenditure  
21 measurements for body size. *Obes. Rev.* **13**, 1001–14 (2012).
- 22 63. Rossi, A. *et al.* Genetic compensation induced by deleterious mutations but not gene  
23 knockdowns. *Nature* **524**, 230–3 (2015).
- 24 64. Holmen, O. L. *et al.* Systematic evaluation of coding variation identifies a candidate causal



- 1 variant in TM6SF2 influencing total cholesterol and myocardial infarction risk. *Nat.*  
2 *Genet.* **46**, 345–51 (2014).
- 3 65. Kozlitina, J. *et al.* Exome-wide association study identifies a TM6SF2 variant that confers  
4 susceptibility to nonalcoholic fatty liver disease. *Nat. Genet.* **46**, 352–6 (2014).
- 5 66. Smagris, E., Gilyard, S., BasuRay, S., Cohen, J. C. & Hobbs, H. H. Inactivation of  
6 Tm6sf2, a Gene Defective in Fatty Liver Disease, Impairs Lipidation but Not Secretion of  
7 Very Low Density Lipoproteins. *J. Biol. Chem.* **291**, 10659–76 (2016).
- 8 67. Palmetshofer, A., Robson, S. C. & Nehls, V. Lysophosphatidic acid activates nuclear  
9 factor kappa B and induces proinflammatory gene expression in endothelial cells. *Thromb.*  
10 *Haemost.* **82**, 1532–7 (1999).
- 11 68. Lin, C. I., Chen, C.-N., Chen, J. H. & Lee, H. Lysophospholipids increase IL-8 and MCP-1  
12 expressions in human umbilical cord vein endothelial cells through an IL-1-dependent  
13 mechanism. *J. Cell. Biochem.* **99**, 1216–1232 (2006).
- 14 69. Siess, W. Athero- and thrombogenic actions of lysophosphatidic acid and sphingosine-1-  
15 phosphate. *Biochim. Biophys. Acta - Mol. Cell Biol. Lipids* **1582**, 204–215 (2002).
- 16 70. Stein, E. *et al.* Achieving lipoprotein goals in patients at high risk with severe  
17 hypercholesterolemia: efficacy and safety of ezetimibe co-administered with atorvastatin.  
18 *Am. Heart J.* **148**, 447–55 (2004).
- 19 71. Bays, H. E. *et al.* Influence of age, gender, and race on the efficacy of adding ezetimibe to  
20 atorvastatin vs. atorvastatin up-titration in patients at moderately high or high risk for  
21 coronary heart disease. *Int. J. Cardiol.* **153**, 141–7 (2011).
- 22 72. Conard, S. *et al.* Ezetimibe added to atorvastatin compared with doubling the atorvastatin  
23 dose in patients at high risk for coronary heart disease with diabetes mellitus, metabolic  
24 syndrome or neither. *Diabetes. Obes. Metab.* **12**, 210–8 (2010).

- 1 73. Yang, Y.-C., Chang, W.-T., Huang, S.-K. & Liao, I. Characterization of the  
2 pharmaceutical effect of drugs on atherosclerotic lesions in vivo using integrated  
3 fluorescence imaging and Raman spectral measurements. *Anal. Chem.* **86**, 3863–8 (2014).
- 4 74. Field, H. A., Kelley, K. A., Martell, L., Goldstein, A. M. & Serluca, F. C. Analysis of  
5 gastrointestinal physiology using a novel intestinal transit assay in zebrafish.  
6 *Neurogastroenterol. Motil.* **21**, 304–12 (2009).
- 7 75. Louis, A., Nguyen, N. T. T., Muffato, M. & Roest Crollius, H. Genomicus update 2015:  
8 KaryoView and MatrixView provide a genome-wide perspective to multispecies  
9 comparative genomics. *Nucleic Acids Res.* **43**, D682-9 (2015).
- 10 76. Montague, T. G., Cruz, J. M., Gagnon, J. A., Church, G. M. & Valen, E. CHOPCHOP: a  
11 CRISPR/Cas9 and TALEN web tool for genome editing. *Nucleic Acids Res.* **42**, W401-7  
12 (2014).
- 13 77. Moreno-Mateos, M. A. *et al.* CRISPRscan: designing highly efficient sgRNAs for  
14 CRISPR-Cas9 targeting in vivo. *Nat. Methods* **12**, 982–8 (2015).
- 15 78. Ranefall, P. & Wählby, C. Global gray-level thresholding based on object size. *Cytometry.*  
16 *A* **89**, 385–90 (2016).
- 17 79. Jones, T. R. *et al.* CellProfiler Analyst: data exploration and analysis software for complex  
18 image-based screens. *BMC Bioinformatics* **9**, 482 (2008).
- 19 80. Sommer C., Strähle C., K. U. Ilastik: Interactive Learning and Segmentation Toolkit. in  
20 *Eighth IEE international Symposium on Biomedical Imaging (ISBI). Proceedings* 230–233  
21 (2011).
- 22 81. Schneider, C. A., Rasband, W. S. & Eliceiri, K. W. NIH Image to ImageJ: 25 years of  
23 image analysis. *Nat. Methods* **9**, 671–5 (2012).
- 24 82. Zhang, J., Kobert, K., Flouri, T. & Stamatakis, A. PEAR: a fast and accurate Illumina

- 1 Paired-End reAd mergeR. *Bioinformatics* **30**, 614–20 (2014).
- 2 83. Pearson, W. R., Wood, T., Zhang, Z. & Miller, W. Comparison of DNA Sequences with  
3 Protein Sequences. *Genomics* **46**, 24–36 (1997).
- 4 84. Dobin, A. *et al.* STAR: ultrafast universal RNA-seq aligner. *Bioinformatics* **29**, 15–21  
5 (2013).
- 6 85. Li, H. *et al.* The Sequence Alignment/Map format and SAMtools. *Bioinformatics* **25**,  
7 2078–2079 (2009).

8

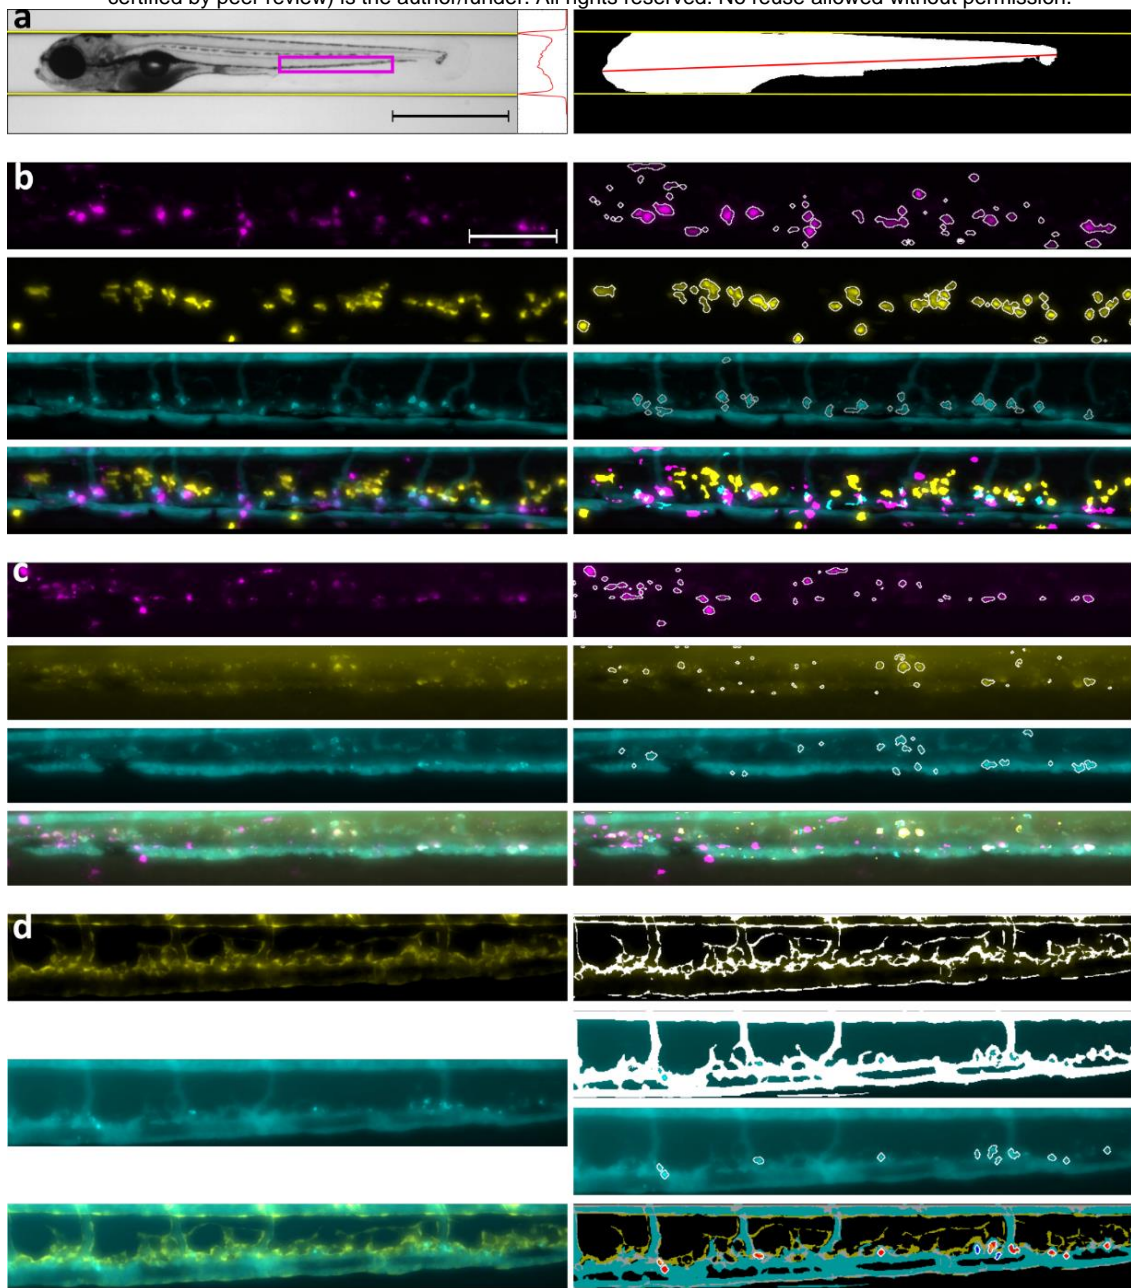

Figure 1. Raw data (left) and objective, semi-automated quantification (right) of body size and early-stage atherosclerosis in 10-day-old zebrafish larvae. a) Left: A bright field image of a zebrafish larva in lateral orientation with projection of all intensity values to the y-axis. The two distinct minima in the projection represent the walls of the capillary, outlined in yellow (scale bar = 1 mm). The region of the tail that was imaged to quantify vascular atherogenic traits is highlighted in magenta. Right: a binary mask of the same larva, with lateral surface area in white, and body length in red. b) A Tg(mpeg1-mCherry; mpo-EGFP) transgenic larva with fluorescently labelled macrophages (top, magenta) and neutrophils (2<sup>nd</sup> from top, yellow). Circulating lipids and vascular lipid deposits were stained with a dye (3<sup>rd</sup> from the top, cyan). The overlay (bottom) shows co-localization of all traits (scale bar = 100µm). c) A Tg(mpeg1-mCherry; hsp70:IK17-EGFP) transgenic larva with fluorescently labelled macrophages (top, magenta) and oxidized LDL (2<sup>nd</sup> from top, yellow) with stained lipids (3<sup>rd</sup> from top, cyan). The overlay shows co-localization of all traits (bottom). d) A Tg(flκ-EGFP) transgenic larva with fluorescently labelled endothelial cells showing endothelial surface area (top, yellow); stained lipids (2<sup>nd</sup> from top, cyan) from which both circulating lipids (right, 2<sup>nd</sup> from top) and vascular lipid deposition (right, 3<sup>rd</sup> from top) were quantified; and an overlay that enabled distinguishing between lipid deposition inside (in red) and outside the endothelium (bottom right, blue).

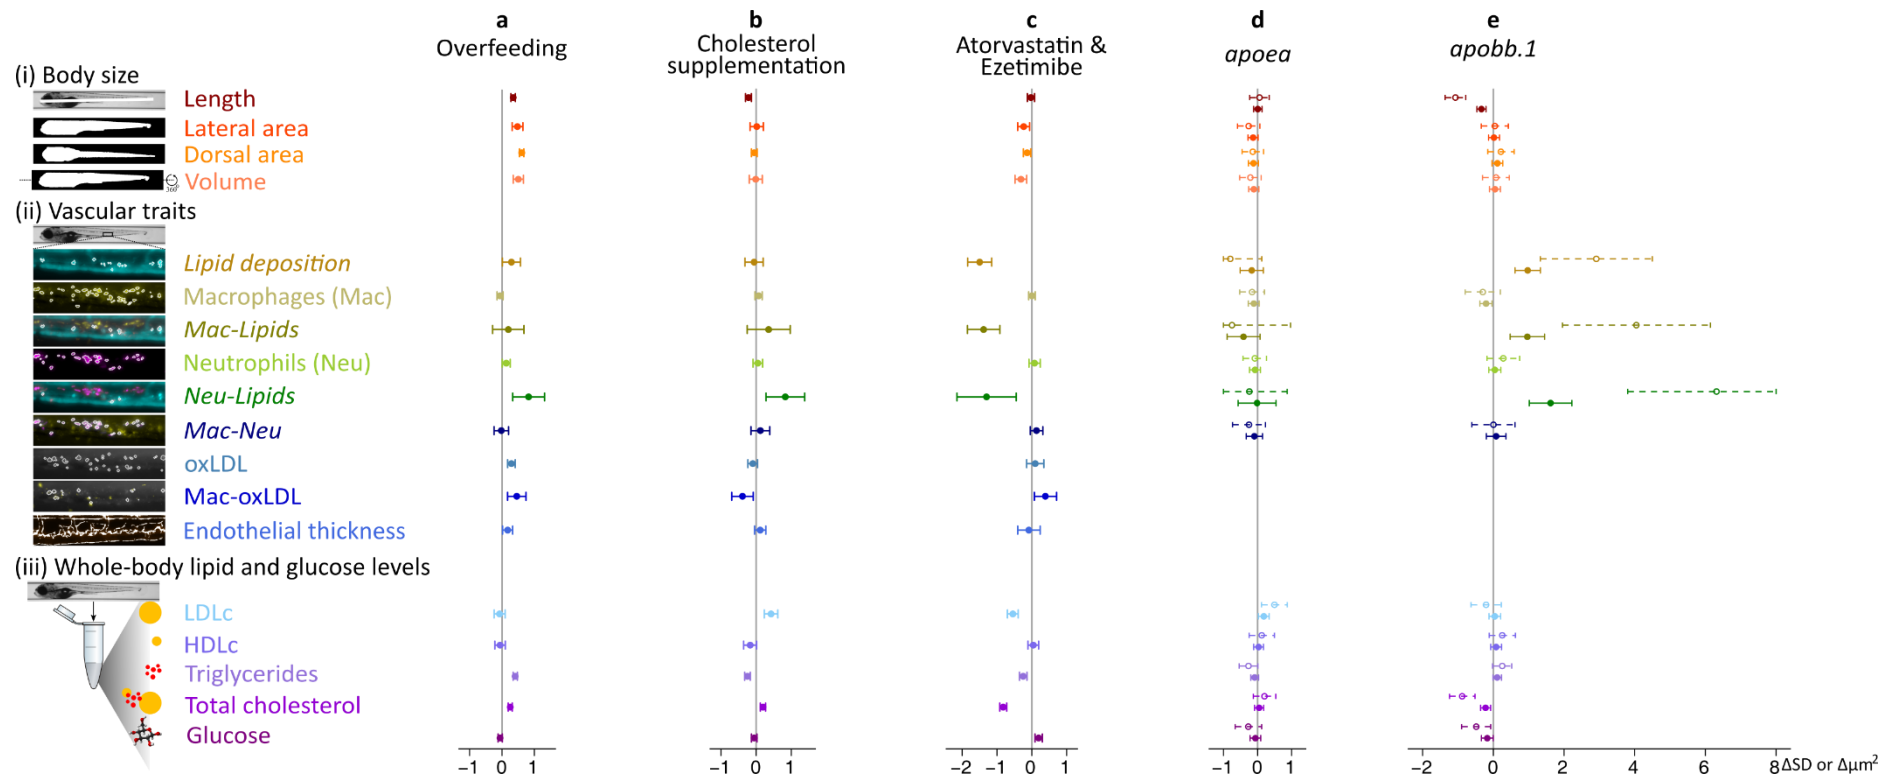

Figure 2. The effect of overfeeding and cholesterol supplementation ( $n > 2000$ ); treatment with atorvastatin and ezetimibe ( $n > 1000$ ); and mutations in *apoea* and *apobb.1* ( $n = 384$ ) on body size (i), vascular atherogenic traits (ii) and whole-body lipid and glucose levels (iii). Across a-e, dorsal and lateral body surface area and body volume were normalized for body length before the analysis; whole-body lipid and glucose levels were normalized for protein levels; and endothelial thickness was normalized for surface area of the circulation. For normally distributed traits, associations were examined using hierarchical linear models on inverse-normally transformed outcomes. For these traits effect sizes and 95% confidence intervals are expressed in standard deviation units (SD). The remaining vascular atherogenic traits (shown in italics) showed a negative binomial distribution and data were analyzed accordingly. For these traits, effect sizes and 95% confidence intervals are expressed in  $\mu\text{m}^2$ . In d and e, open circles and the dotted lines represent the effect of two functionally knocked-out alleles vs. two unmodified alleles, and full circles and filled lines represent the additive per mutated allele effect. Associations were adjusted for time of day; use of diethyl ether (for overfeeding and cholesterol supplementation); cholesterol supplementation (for overfeeding); the amount fed (for cholesterol supplementation); body length and dorsal body surface area (for vascular outcomes); batch; and transgenic background.

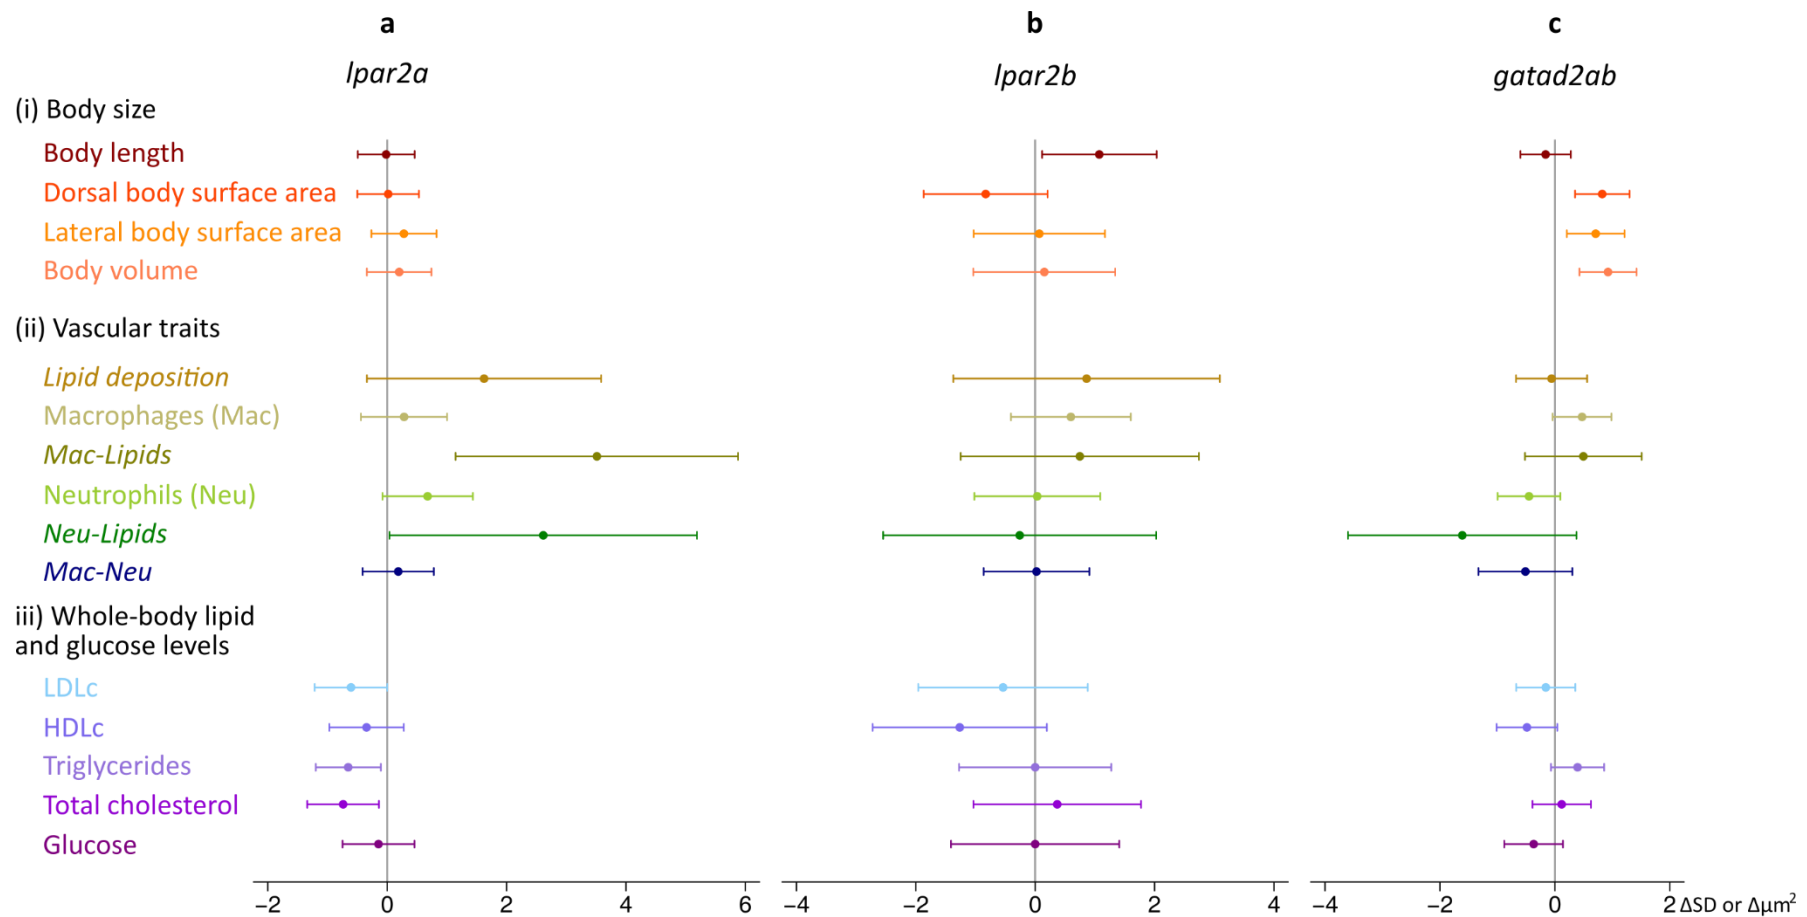

Figure 3. The mutually adjusted effect of mutations in zebrafish orthologues of LPAR2 and GATAD2A (n=547) on body size (i), vascular atherogenic traits (ii) and whole-body lipid and glucose levels (iii) using an additive model. Dorsal and lateral body surface area and body volume were normalized for body length; and whole-body lipid and glucose levels were normalized for protein levels before the analysis. For normally distributed traits, associations were examined using hierarchical linear models on inverse-normally transformed outcomes. For these traits, effect sizes and 95% confidence intervals are expressed in standard deviation units (SD). Some vascular atherogenic traits showed a negative binomial distribution and associations were analyzed accordingly. For these traits (shown in italics), effect sizes and 95% confidence intervals are expressed in  $\mu\text{m}^2$ . Associations were adjusted for time of day; body length and dorsal body surface area (for vascular outcomes); and batch.

## SUPPLEMENTARY FIGURES

Supplementary Figure 1 - The effect of overfeeding, cholesterol supplementation and treatment with atorvastatin and ezetimibe on body size (p56)

Supplementary Figure 2 - The effect of overfeeding, cholesterol supplementation and treatment with atorvastatin and ezetimibe on whole-body lipid and glucose levels (p57)

Supplementary Figure 3 - The effect of overfeeding, cholesterol supplementation and treatment with atorvastatin and ezetimibe on vascular atherogenic traits (p58-59)

Supplementary Figure 4 - Food intake as a function of dietary or drug treatment intervention (p60)

Supplementary Figure 5 - Histogram of the number of mutated alleles and genetic burden score across apoea, apoeb, apobb.1 and ldlra and association of whole-body LDL cholesterol levels, vascular lipid deposition and vascular co-localization of lipids and neutrophils with the genetic burden score (p61)

Supplementary Figure 6 - The effect of mutations in apoea, apoeb, apobb.1 and ldlra on body size, vascular atherogenic traits and whole-body lipid and glucose levels (p62-63)

Supplementary Figure 7 - The association of predicted total cholesterol levels using regression of directly assessed LDLc, HDLc and triglyceride levels with directly assessed total cholesterol levels (p64)

Supplementary Figure 8 - The association of vascular atherogenic traits with whole-body lipid and glucose levels in data from the dietary, drug treatment and genetic intervention for proof-of-concept genes combined (p65-66)

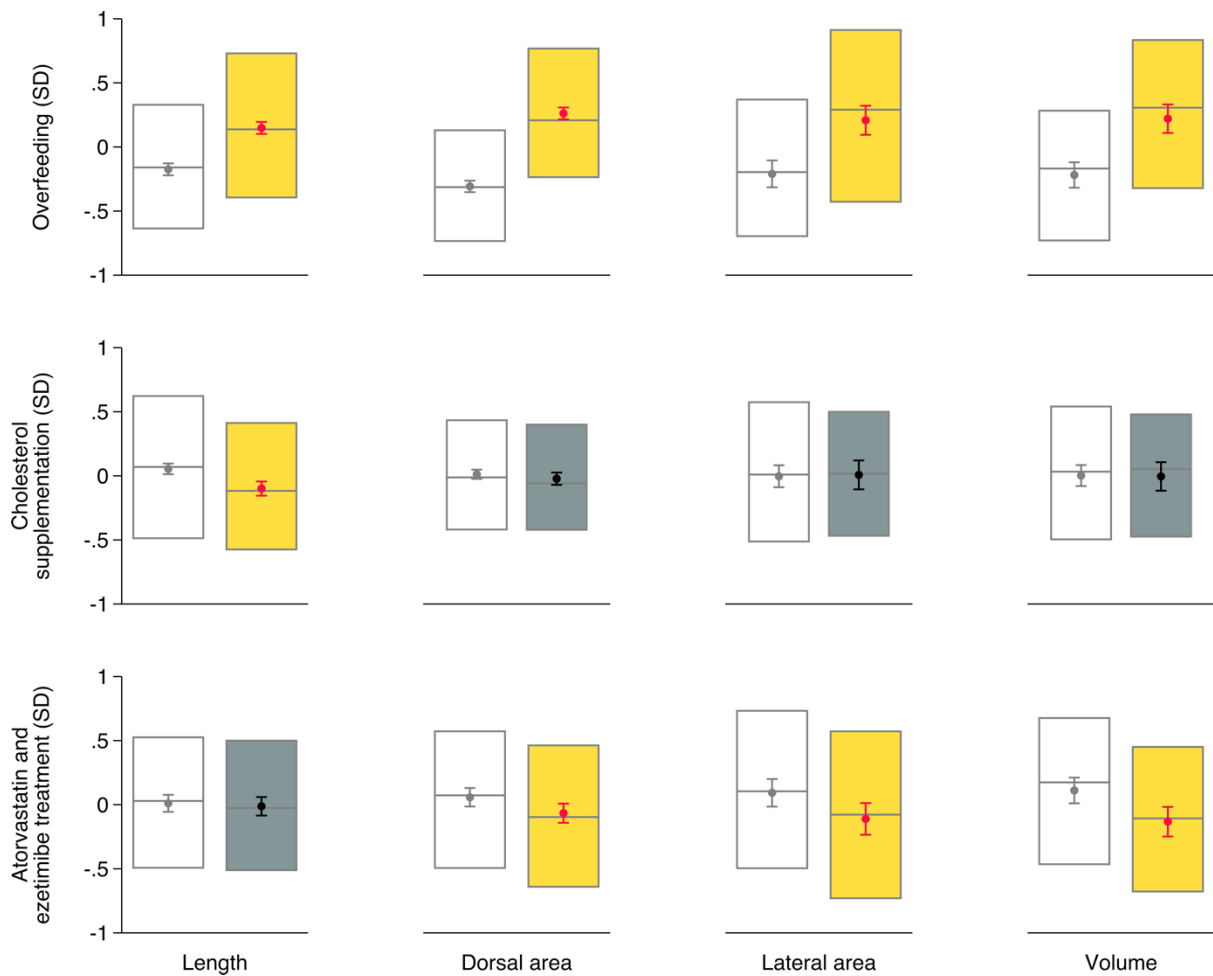

Supplementary Figure 1. The effect of overfeeding (top), cholesterol supplementation (middle) and treatment with atorvastatin and ezetimibe (bottom) on body size. Dots and whiskers show mean and 95% confidence interval (CI); boxes show median and inter quantile range. Analyses were performed using residuals acquired using hierarchical linear models on inverse-normally transformed outcomes, adjusted for the use of diethyl ether (for overfeeding and cholesterol supplementation), cholesterol supplementation (for overfeeding), the amount fed (for cholesterol supplementation), and time of day as fixed factors. Larvae were nested in batches and transgenic backgrounds (random factors). White boxes with grey mean and 95% CI (left) show results for unexposed larvae; grey boxes with black mean and 95% CI (right) show results for exposed larvae that are not different from unexposed ones; yellow boxes with red mean and 95% CI (right) show results for exposed larvae that are different from unexposed ones at  $P < 0.05$ .



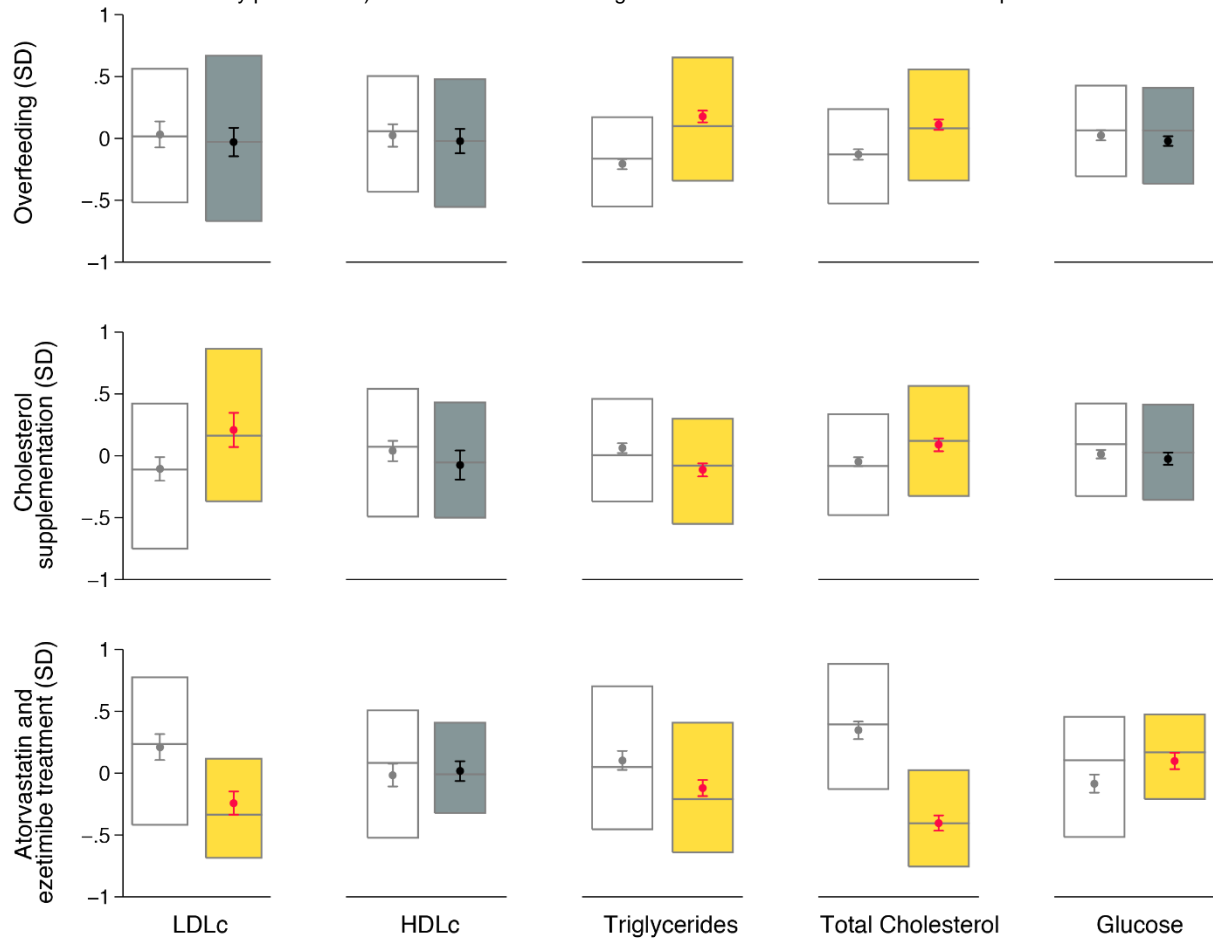

Supplementary Figure 2. The effect of overfeeding (top), cholesterol supplementation (middle) and treatment with atorvastatin and ezetimibe (bottom) on whole-body lipid and glucose levels. Dots and whiskers show mean and 95% confidence interval (CI); boxes show median and inter quantile range. Analyses were performed using residuals acquired using hierarchical linear models on inverse-normally transformed outcomes, adjusting for the use of diethyl ether (for overfeeding and cholesterol supplementation), cholesterol supplementation (for overfeeding), the amount fed (for cholesterol supplementation) and time of day as fixed factors. Larvae were nested in batches and transgenic backgrounds (random factors). White boxes with grey mean and 95% CI (left) show results for unexposed larvae; grey boxes with black mean and 95% CI (right) show results for exposed larvae that are not different from unexposed ones; yellow boxes with red mean and 95% CI (right) show results for exposed larvae that are different from unexposed ones at  $P < 0.05$ .

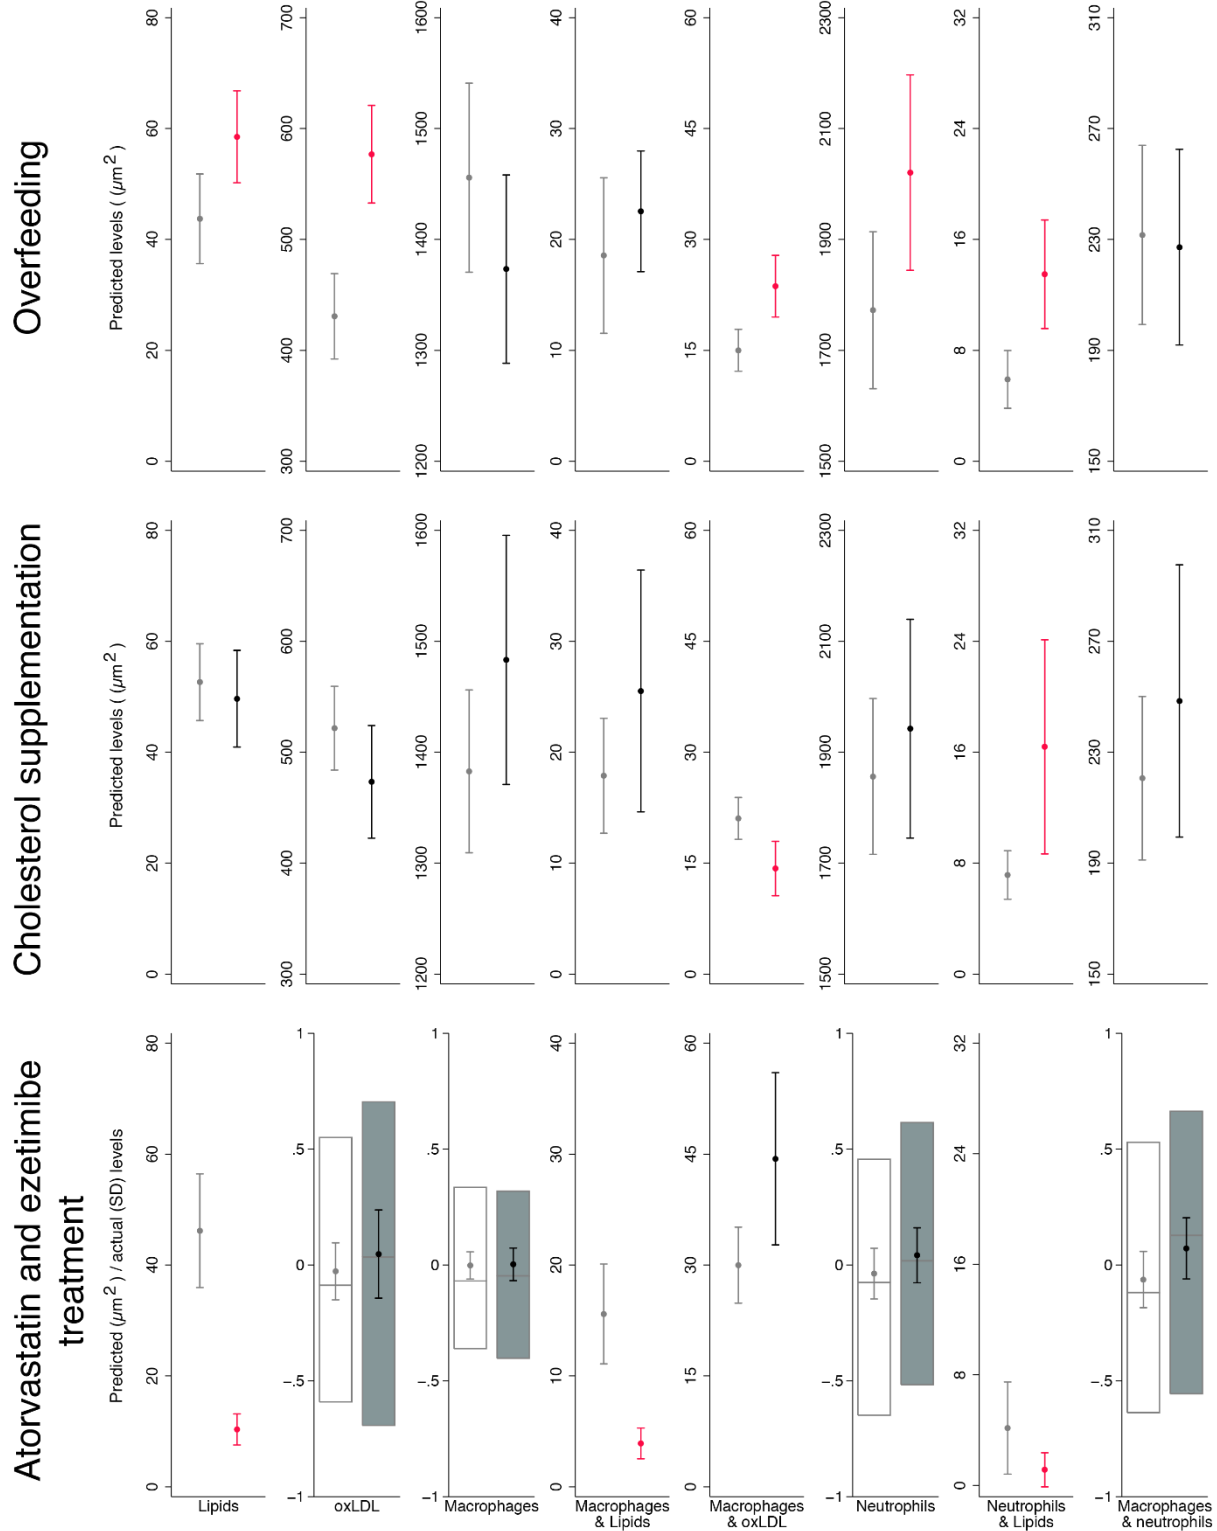

Supplementary Figure 3. The effect of overfeeding (top), cholesterol supplementation (middle) and treatment with atorvastatin and ezetimibe (bottom) on vascular atherogenic traits. Outcomes showing effect estimate and 95% CI for predicted values have been analyzed using negative binomial regression, with adjustment for the same co-variables. Outcomes showing only effect estimate and 95% CI for predicted values have been analyzed using regular negative binomial regression, adjusting for the use of diethyl ether (for overfeeding and cholesterol supplementation), cholesterol supplementation (for overfeeding), the amount fed (for cholesterol supplementation), body length, dorsal body surface area, and time of day. Outcomes showing mean and 95% confidence interval (CI) as well as boxes for median and inter quartile range have been analyzed using hierarchical linear models on residuals after

adjusting inverse-normally transformed outcomes for body length, dorsal body surface area, and time of day as fixed factors. Larvae were nested in batches and transgenic backgrounds (random factors). White boxes and/or light grey mean and 95% CI (left) show results for unexposed larvae; grey boxes and/or black mean and 95% CI (right) show results for exposed larvae that are not different from unexposed ones; red mean and 95% CI (right) show results for exposed larvae that are different from unexposed ones at  $P < 0.05$ .

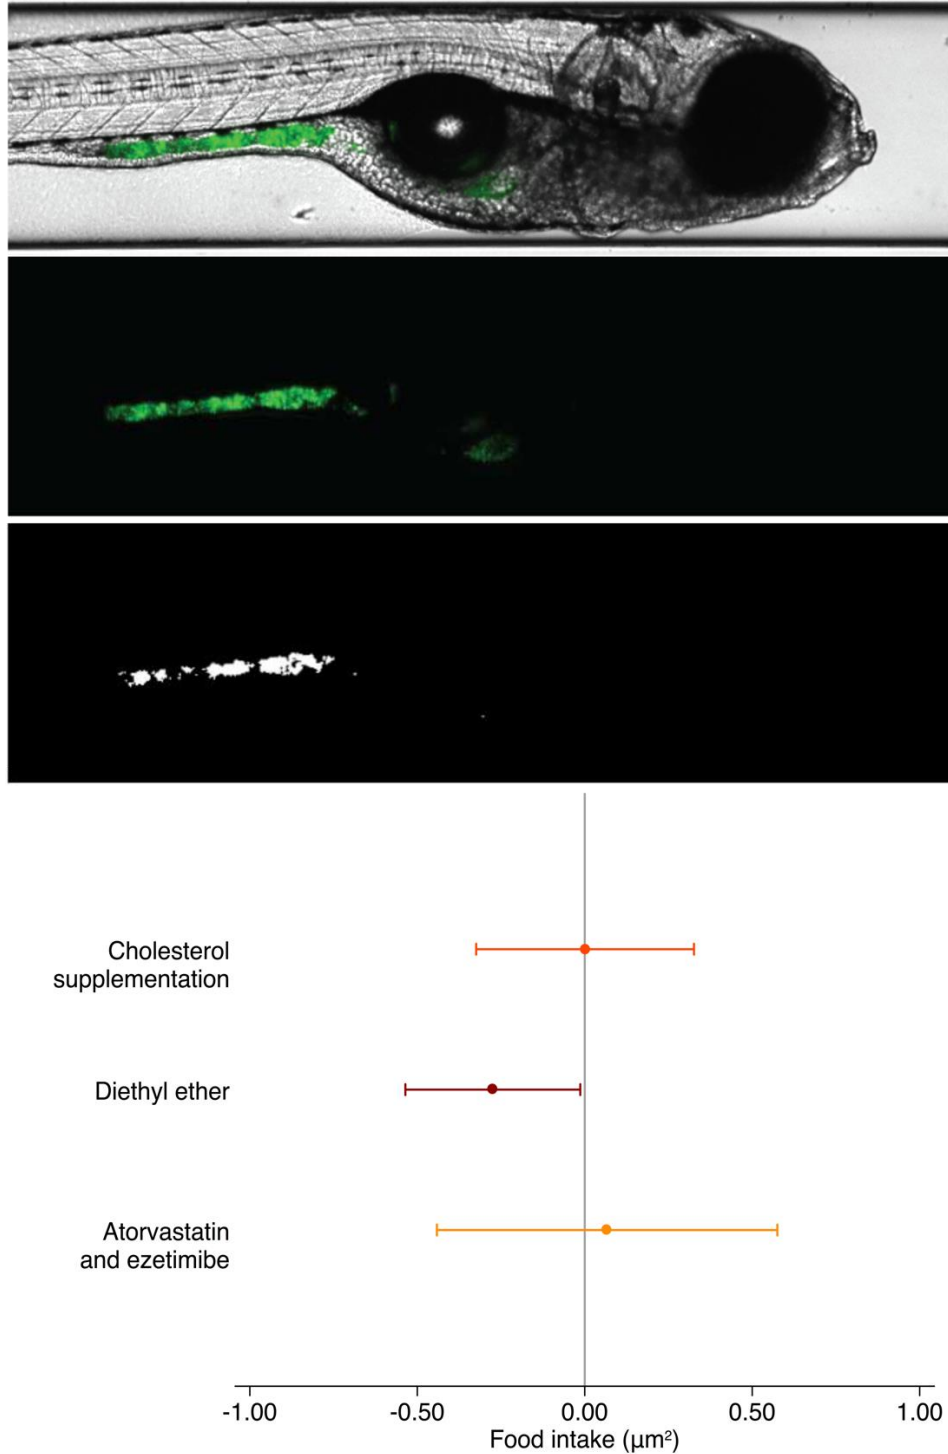

Supplementary Figure 4. Food intake as a function of dietary or drug treatment intervention. Mixing fluorescently labelled tracers in with standard dry food, standard dry food enriched with 4% extra cholesterol using diethyl ether, standard dry food treated with diethyl ether, and standard dry food enriched with 4% extra cholesterol using diethyl ether and further enriched with atorvastatin and ezetimibe allowed image-based quantification of food intake - i.e. surface area of fluorescence in the gastrointestinal tract - in eight-day-old zebrafish larvae (top). Bottom: mutually adjusted effect of cholesterol supplementation, treatment of the diet with diethyl ether, and enrichment with atorvastatin and ezetimibe on food intake, assessed using dummy variables and negative binomial regression, additionally adjusted for time since feeding and batch ( $n=204$ ). Dots and whiskers show effect size and 95% confidence interval.

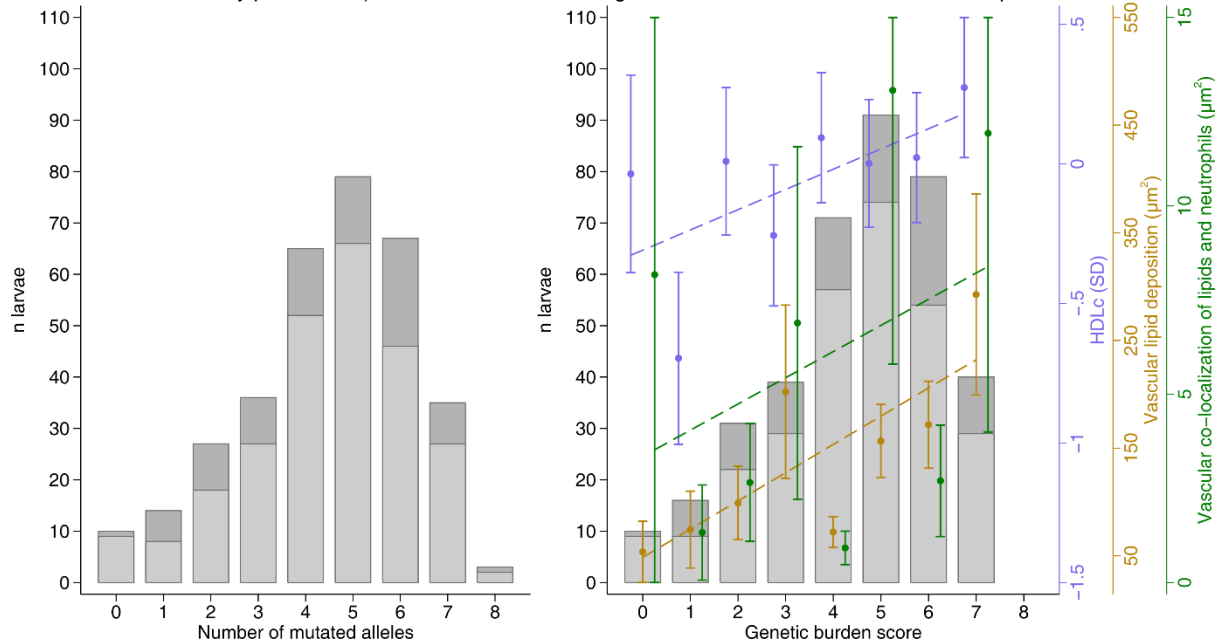

Supplementary Figure 5. Histogram of the number of mutated alleles and genetic burden score across *apoea*, *apoeb*, *apobb.1* and *ldlra* and association of whole-body HDL cholesterol levels, vascular lipid deposition and vascular co-localization of lipids and neutrophils with the genetic burden score. Left: histogram of the number of mutated alleles across *apoea*, *apoeb*, *apobb.1* and *ldlra*. Larvae with two mutated alleles in *apoba*, *apobb.2* and *ldlr* are shown in light grey (bottom); larvae with at least one unaffected allele in these three genes are shown in dark grey (top). Right: as before, but with each affected allele weighed by the probability that it affects protein function, based on annotation using Ensembl's variant effect predictor (VEP) (i.e. a genetic burden score). This figure also shows the association between atherogenic traits and the genetic burden score for significantly associated traits, adjusted for the number of mutated alleles in *apoba*, *apobb.2* and *ldlr*, i.e: 1) HDLc (n=381, in purple), assessed using a hierarchical linear model after inverse-normal transformation of LDLc, adjusted for time of day (fixed factors) and with larvae nested in batches; 2) vascular lipid deposition (n=272, in yellow); and 3) vascular co-localization of lipids and neutrophils (n=271, in green), using negative binomial regression, adjusted for body length, dorsal body surface area, time of day and batch. Dots and whiskers show mean and standard error of the mean, acquired using the margins command.

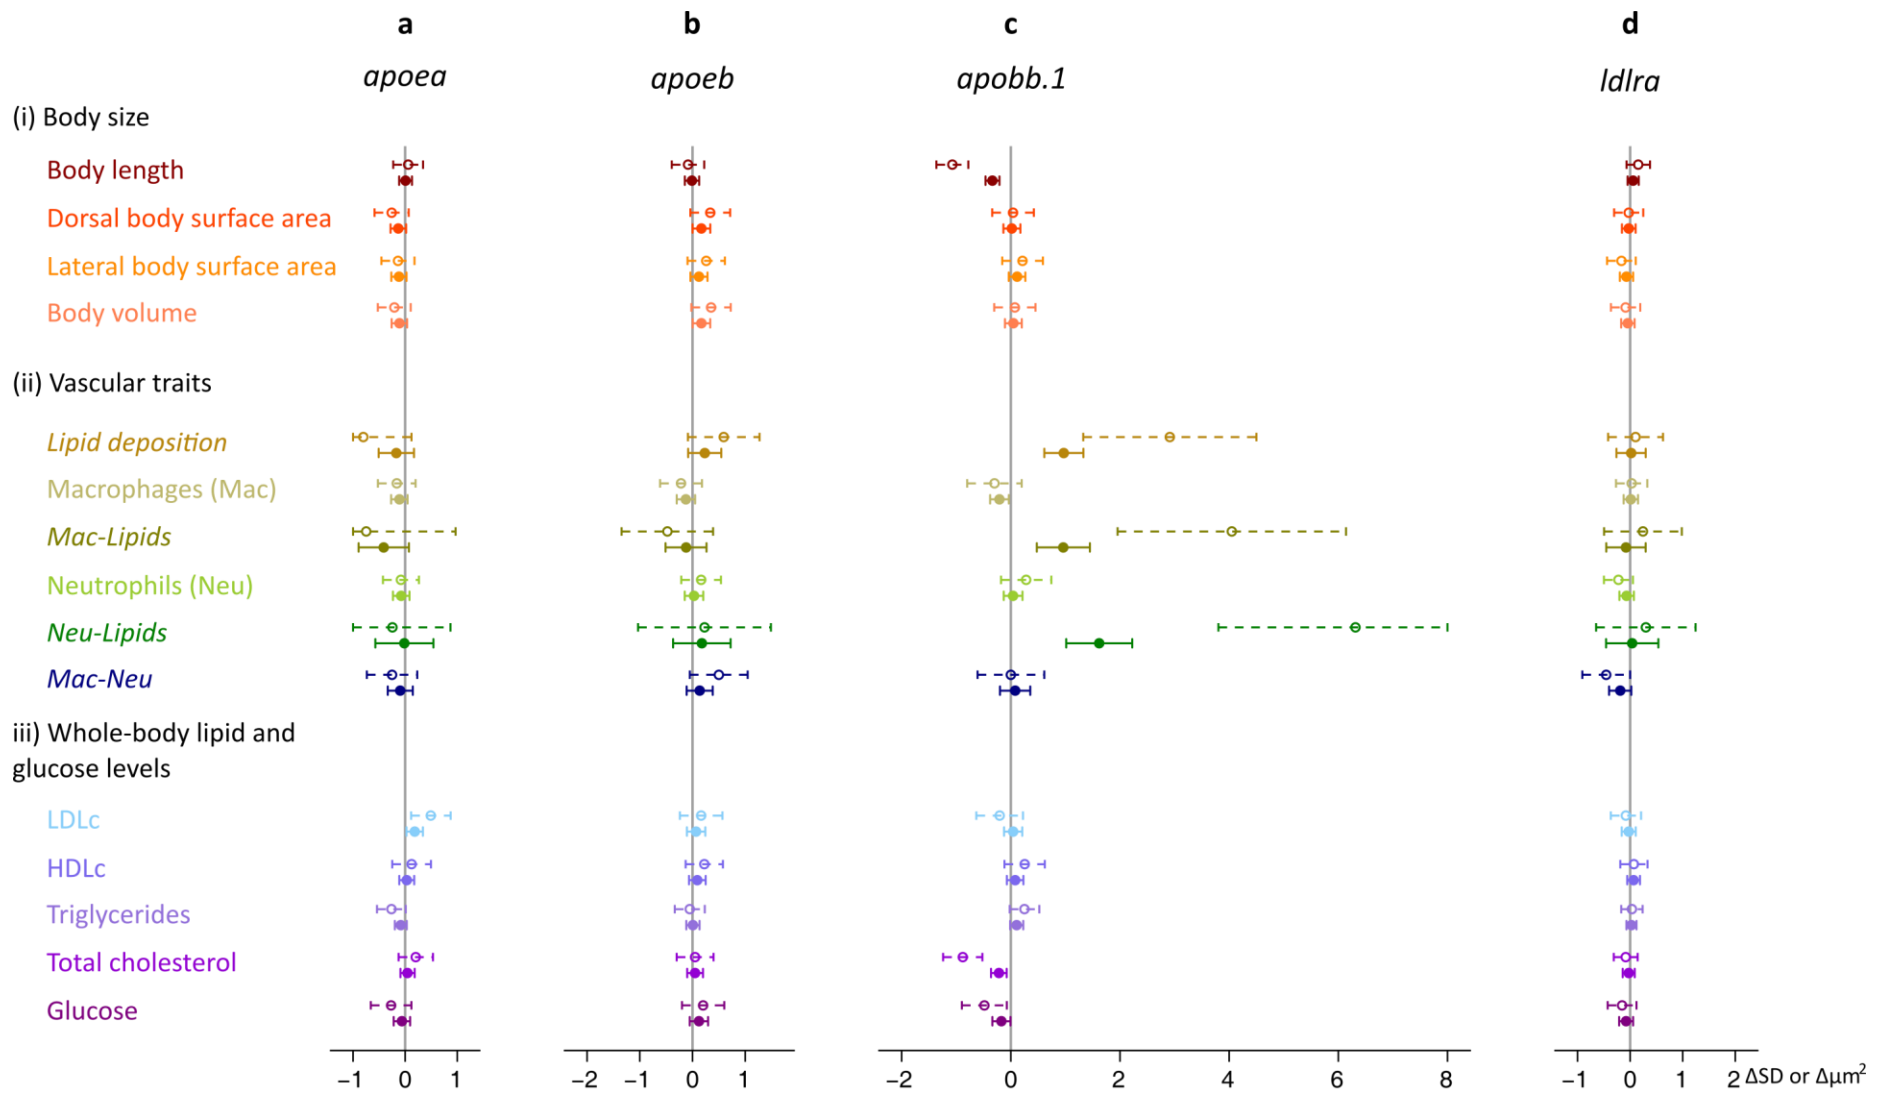

Supplementary Figure 6. The effect of mutations in *apoea*, *apoeb*, *apobb.1* and *ldlra* on body size (i), vascular atherogenic traits (ii) and whole-body lipid and glucose levels (iii). Dorsal and lateral body surface area and body volume were normalized for body length before the analysis; and whole-body lipid and

glucose levels were normalized for protein levels. For normally distributed traits (shown in regular font), associations were examined using hierarchical linear models on inverse-normally transformed values. For these traits effect sizes and 95% confidence intervals are expressed in standard deviation units (SD). The remaining vascular atherogenic traits (shown in *italic*) were analyzed using negative binomial regression analyses. For these traits, effect sizes and 95% confidence intervals are expressed in  $\mu\text{m}^2$ . Dotted lines represent the effect of two functionally knocked out alleles compared with zero mutated alleles. Regular lines show the additive per-allele effect. Associations were adjusted for time of day; batch; body length and dorsal body surface area (for vascular outcomes); and the number of mutated alleles in the other genes.

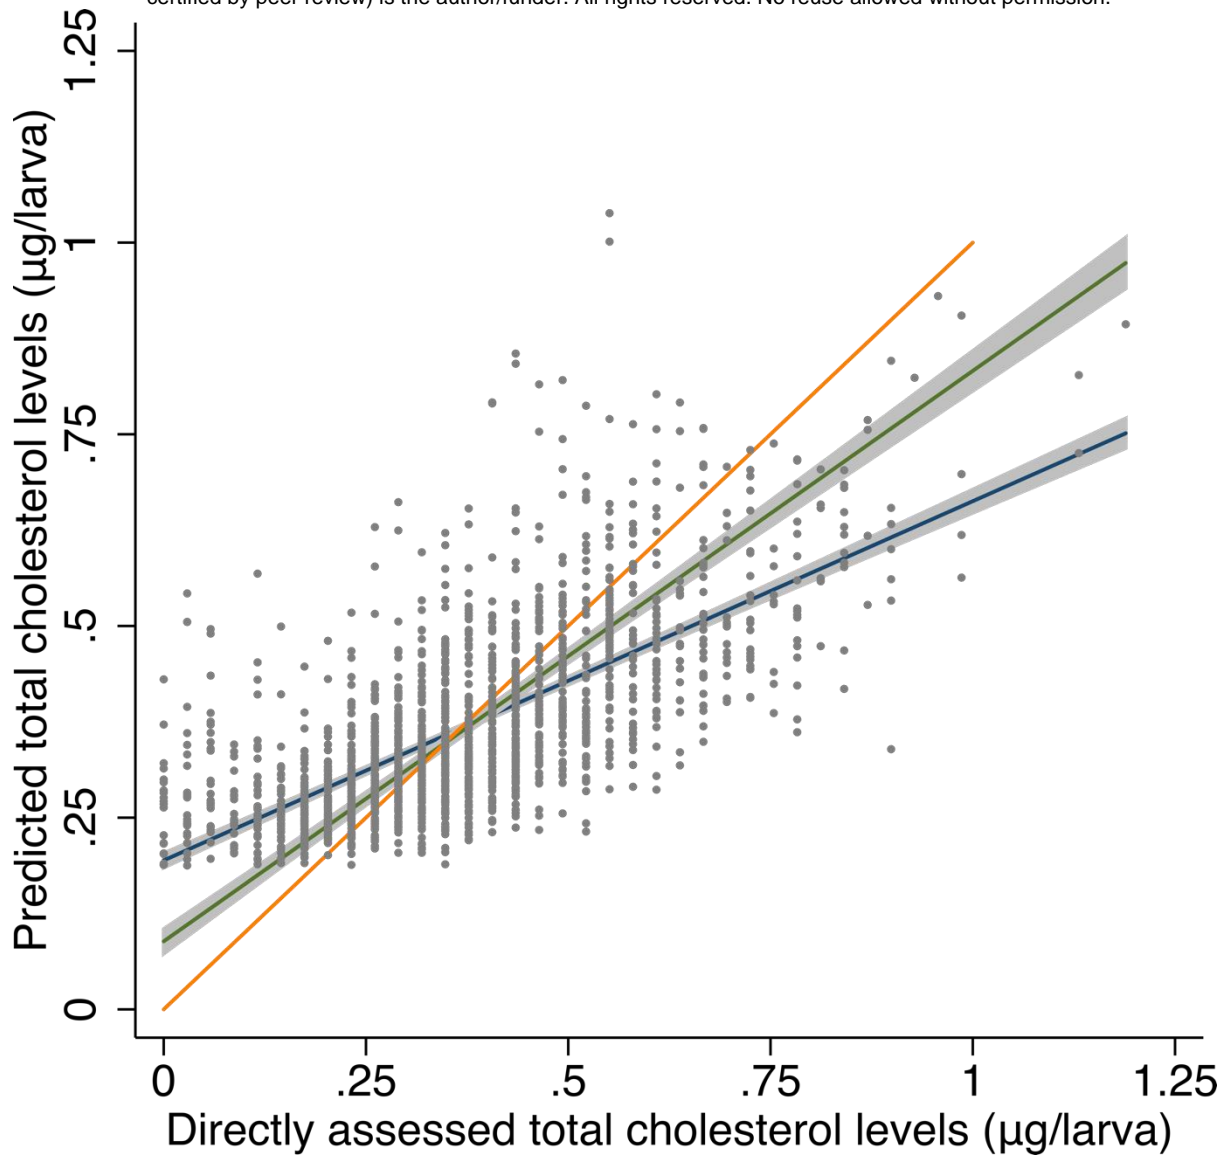

Supplementary Figure 7. The association of predicted total cholesterol levels using regression of directly assessed LDLc, HDLc and triglyceride levels with directly assessed total cholesterol levels. In blue and grey are the regression line and 95% confidence interval (CI) ( $r^2=0.468$ ). In green and grey are the regression line and 95% CI for the association of total cholesterol levels calculated using the formula that is typically applied in humans (i.e. LDLc + HDLc + triglycerides/5) with directly assessed total cholesterol levels ( $r^2=0.430$ ). In orange is a line with a slope of 1 ( $n=1,867$  larvae).



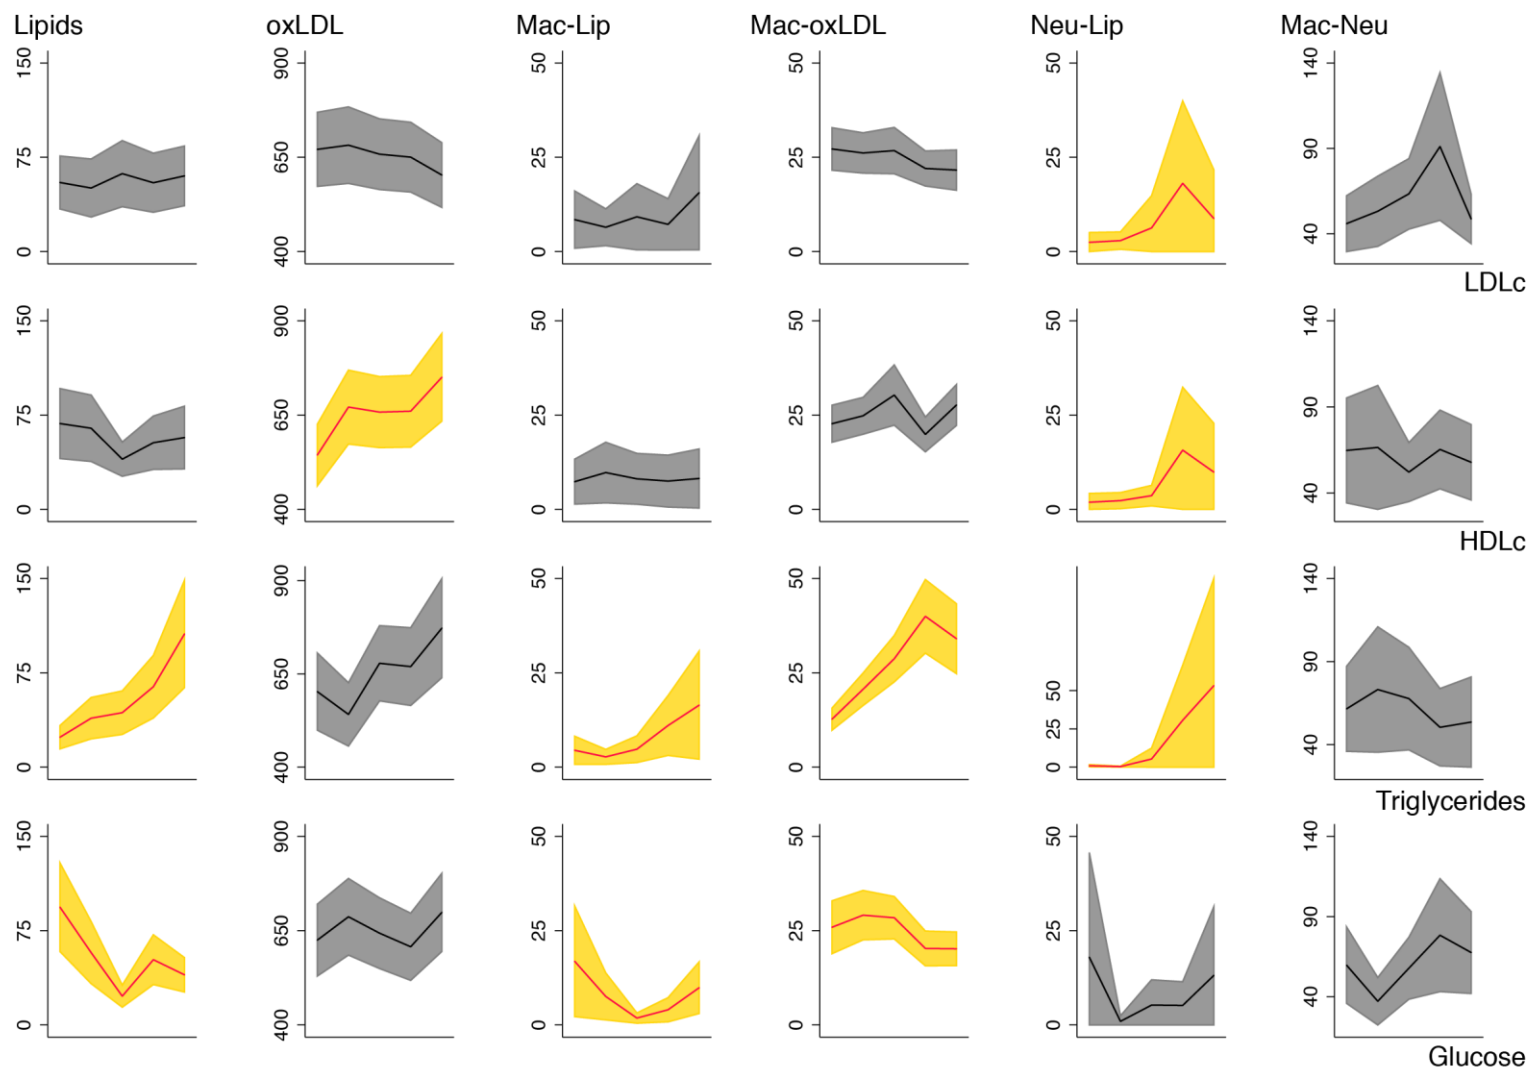

Supplementary Figure 8. The association of vascular atherogenic traits with whole-body lipid and glucose levels in data from the dietary, drug treatment and genetic intervention for proof-of-concept genes combined. For each vascular atherogenic outcome (i.e. vascular lipid deposition [Lip] and accumulation of oxidized LDL [oxLDL]; and vascular co-localization of lipids and oxLDL with macrophages [Mac] and neutrophils [Neu]), mutually adjusted associations with

protein-normalized levels of LDL cholesterol (LDLc), HDL cholesterol (HDLc), triglyceride and glucose levels were examined using negative binomial regression. Besides for the other main exposures, associations were adjusted for body length and dorsal body surface area, transgenic background and batch. Graphs show margins plots – highlighting mean and 95% confidence intervals – for the vascular atherogenic outcomes, expressed in  $\mu\text{m}^2$  (y-axes) with exposures grouped by quintile (x-axes). Significant associations are shown in yellow.

## SUPPLEMENTARY TABLES

Supplementary Table 1 - Descriptive information for larvae at 10 days post-fertilization in the dietary, drug treatment and genetic interventions (p70)

Supplementary Table 2 - Annotation-based exclusions in the image-based analyses (p71)

Supplementary Table 3 - The effect of overfeeding and cholesterol supplementation on body size (p72)

Supplementary Table 4 - The effect of overfeeding and cholesterol supplementation on whole-body lipid and glucose levels (p73)

Supplementary Table 5 - The effect of overfeeding and cholesterol supplementation on image-based vascular atherogenic traits (p74-78)

Supplementary Table 6 - The effect of overfeeding and cholesterol supplementation on suboptimal image or quantification quality (p79-81)

Supplementary Table 7 - The effect of treatment with atorvastatin and ezetimibe on body size (p82)

Supplementary Table 8 - The effect of treatment with atorvastatin and ezetimibe on whole-body lipid and glucose levels (p83)

Supplementary Table 9 - The effect of atorvastatin and ezetimibe on image-based vascular atherogenic traits (p84-86)

Supplementary Table 10 - The effect of treatment with atorvastatin and ezetimibe on suboptimal image or quantification quality (p87)

Supplementary Table 11 - Orthologues of proof-of-concept genes for dyslipidemia, atherosclerosis and coronary artery disease (p88)

Supplementary Table 12 - Identification of moderate-to-highly active CRISPR-Cas9 guide RNAs for proof-of-concept genes (p89)

Supplementary Table 13 - Unique CRISPR-Cas9-induced mutations for orthologues of proof-of-concept genes (p90-91)

Supplementary Table 14 - Unique CRISPR-Cas9-induced variants in the most prominently observed sequence(s) and their predicted functional consequences (p92-93)

Supplementary Table 15 - Sequencing results expressed in number of mutated alleles for proof-of-concept genes in F<sub>1</sub> larvae (p94)

Supplementary Table 16 - The effect of a genetic burden score comprising the number of mutated alleles across *apoea*, *apoeb*, *apobb.1* and *ldlra* on body size (p95)

**Supplementary Table 17** - The effect of a genetic burden score on whole-body lipid and glucose levels (p96-97)

**Supplementary Table 18** - The effect of a genetic burden score on vascular atherogenic traits (p98-100)

**Supplementary Table 19** - The effect of two vs. zero mutated alleles in *apoea*, *apoeb*, *apobb.1* or *ldlra* on body size (p101-102)

**Supplementary Table 20** - The effect of two vs. zero mutated alleles in *apoea*, *apoeb*, *apobb.1* or *ldlra* on whole-body lipid and glucose levels (p103-104)

**Supplementary Table 21** - The effect of two vs. zero mutated alleles in *apoea*, *apoeb*, *apobb.1* or *ldlra* on vascular atherogenic and inflammatory traits (p105-116)

**Supplementary Table 22** - The additive effect of mutated alleles in *apoea*, *apoeb*, *apobb.1* and *ldlra* on body size (p117)

**Supplementary Table 23** - The additive effect of mutated alleles in *apoea*, *apoeb*, *apobb.1* and *ldlra* on whole-body lipid and glucose levels (p118-119)

**Supplementary Table 24** - The additive effect of mutated alleles in *apoea*, *apoeb*, *apobb.1* and *ldlra* on image-based vascular atherogenic traits (p120-122)

**Supplementary Table 25** - The additive effect of mutated alleles in *apoea*, *apoeb*, *apobb.1* and *ldlra* on image and image quantification quality (p123)

**Supplementary Table 26** - The effect of gene x gene interactions on body size (p124)

**Supplementary Table 27** - The effect of gene x gene interactions on whole-body lipid and glucose levels (p125)

**Supplementary Table 28** - The effect of gene x gene interactions on image-based vascular atherogenic traits (p126)

**Supplementary Table 29** - The association of image-based vascular atherogenic traits with whole-body lipid and glucose levels in data from all validation studies combined (p127-128)

**Supplementary Table 30** - Orthologues of candidate genes in a triglyceride, LDLc and total cholesterol-associated locus on chr 19p13.11 (p129)

**Supplementary Table 31** - Identification of moderate-to-highly active CRISPR-Cas9 guide RNAs for orthologues of candidate genes in the 19p13.11 locus (p130)

**Supplementary Table 32** - Unique CRISPR-Cas9-induced mutations for orthologues of candidate genes in the 19p13.11 locus (p131)

**Supplementary Table 33** - Unique CRISPR-Cas9-induced mutations for orthologues of candidate genes in the 19p13.11 locus and their predicted functional consequences (p132)

**Supplementary Table 34** - Sequencing results expressed in number of mutated alleles for candidate genes in the 19p13.11 locus (p133)

**Supplementary Table 35** - The association of body size with the number of mutated alleles in lpar2a, lpar2b and gatad2ab under an additive model (p134)

**Supplementary Table 36** - The association of whole-body lipid and glucose levels with the number of mutated alleles in lpar2a, lpar2b and gatad2ab under an additive model (p135-136)

**Supplementary Table 37** - The association of image-based vascular atherogenic and inflammatory traits with the number of mutated alleles in lpar2a, lpar2b and gatad2ab under an additive model (p137-139)

**Supplementary Table 38** - The effect of mutations in lpar2a, lpar2b and gatad2ab on image quality for criteria that affected at least 10 larvae (p140-144)

Supplementary Table 1 - Descriptive information for larvae at 10 days post-fertilization in the dietary, drug treatment and genetic interventions

|                                                              | Transgenic background(s)                         | Dietary intervention |                     |                     | Drug treatment intervention |                     |                     | Genetic intervention |                     |                     |                    |                     |                     |
|--------------------------------------------------------------|--------------------------------------------------|----------------------|---------------------|---------------------|-----------------------------|---------------------|---------------------|----------------------|---------------------|---------------------|--------------------|---------------------|---------------------|
|                                                              |                                                  | n <sub>total</sub>   | Mean / Median       | SD / IQR            | n <sub>total</sub>          | Mean / Median       | SD / IQR            | Proof of concept     |                     |                     | Discovery          |                     |                     |
|                                                              |                                                  |                      |                     |                     |                             |                     |                     | n <sub>total</sub>   | Mean / Median       | SD / IQR            | n <sub>total</sub> | Mean / Median       | SD / IQR            |
| <b>Body size</b>                                             |                                                  |                      |                     |                     |                             |                     |                     |                      |                     |                     |                    |                     |                     |
| Body length (µm)                                             |                                                  | 2193                 | 4327                | 260                 | 1004                        | 4343                | 234                 | 339                  | 4628                | 266                 | 505                | 4451                | 230                 |
| Dorsal surface area (µm <sup>2</sup> )                       |                                                  | 2193                 | 1.1×10 <sup>6</sup> | 1.6×10 <sup>5</sup> | 1004                        | 1.2×10 <sup>6</sup> | 1.2×10 <sup>5</sup> | 339                  | 1.2×10 <sup>6</sup> | 1.7×10 <sup>5</sup> | 505                | 1.1×10 <sup>6</sup> | 1.6×10 <sup>5</sup> |
| Lateral surface area (µm <sup>2</sup> )                      |                                                  | 524                  | 1.5×10 <sup>6</sup> | 1.6×10 <sup>5</sup> | 553                         | 1.4×10 <sup>6</sup> | 1.5×10 <sup>5</sup> | 336                  | 1.6×10 <sup>6</sup> | 2.0×10 <sup>5</sup> | 502                | 1.5×10 <sup>6</sup> | 1.9×10 <sup>5</sup> |
| Body volume (µm <sup>3</sup> )                               |                                                  | 514                  | 4.3×10 <sup>8</sup> | 6.1×10 <sup>7</sup> | 512                         | 4.3×10 <sup>8</sup> | 6.0×10 <sup>7</sup> | 328                  | 4.6×10 <sup>8</sup> | 8.4×10 <sup>7</sup> | 495                | 4.0×10 <sup>8</sup> | 8.1×10 <sup>7</sup> |
| <b>Whole-body lipid and glucose levels</b>                   |                                                  |                      |                     |                     |                             |                     |                     |                      |                     |                     |                    |                     |                     |
| LDL cholesterol (µg)                                         |                                                  | 564                  | 0.04                | 0.04                | 567                         | 0.12                | 0.08                | 339                  | 0.18                | 0.12                | 513                | 0.49                | 0.34                |
| HDL cholesterol (µg)                                         |                                                  | 549                  | 0.06                | 0.02                | 564                         | 0.06                | 0.04                | 339                  | 0.15                | 0.05                | 513                | 0.29                | 0.16                |
| Triglyceride levels (µg)                                     |                                                  | 2123                 | 0.93                | 0.80                | 1005                        | 0.61                | 0.51                | 339                  | 1.10                | 0.82                | 513                | 1.27                | 1.07                |
| Total cholesterol levels (µg)                                |                                                  | 2123                 | 0.29                | 0.17                | 1005                        | 0.36                | 0.18                | 339                  | 0.45                | 0.21                | 513                | 0.29                | 0.14                |
| Glucose (µg)                                                 |                                                  | 2128                 | 0.92                | 0.66                | 1008                        | 0.38                | 0.42                | 339                  | 0.30                | 0.16                | 513                | 0.80                | 0.53                |
| <b>Vascular atherogenic traits</b>                           |                                                  |                      |                     |                     |                             |                     |                     |                      |                     |                     |                    |                     |                     |
| Lipid deposition (µm <sup>2</sup> )                          | -                                                | 1954                 | 0                   | 36                  | 837                         | 0                   | 20                  | 272                  | 43                  | 133                 | 280                | 94                  | 135                 |
| oxLDL deposition (µm <sup>2</sup> )                          | <i>Tg:hsp70:IK17-EGFP</i>                        | 885                  | 338                 | 590                 | 236                         | 852                 | 674                 | -                    | -                   | -                   | -                  | -                   | -                   |
| Infiltration by macrophages (µm <sup>2</sup> )               | <i>Tg:mpeg1-mCherry</i>                          | 994                  | 942                 | 1607                | 633                         | 1881                | 1057                | 328                  | 1475                | 1005                | 363                | 1705                | 729                 |
| Infiltration by neutrophils (µm <sup>2</sup> )               | <i>Tg:mpo-EGFP</i>                               | 494                  | 1545                | 2116                | 404                         | 2438                | 873                 | 330                  | 1050                | 911                 | 363                | 1806                | 941                 |
| Co-localizing macrophages and lipids (µm <sup>2</sup> )      | <i>Tg:mpeg1-mCherry</i>                          | 917                  | 0                   | 10                  | 605                         | 0                   | 0                   | 269                  | 1                   | 13                  | 263                | 23                  | 48                  |
| Co-localizing macrophages and oxLDL (µm <sup>2</sup> )       | <i>Tg:hsp70:IK17-EGFP &amp; Tg:mpeg1-mCherry</i> | 433                  | 10                  | 22                  | 212                         | 20                  | 39                  | -                    | -                   | -                   | -                  | -                   | -                   |
| Co-localizing neutrophils and lipids (µm <sup>2</sup> )      | <i>Tg:mpo-EGFP</i>                               | 440                  | 0                   | 8                   | 393                         | 0                   | 0                   | 271                  | 0                   | 0                   | 260                | 5                   | 12                  |
| Co-localizing macrophages and neutrophils (µm <sup>2</sup> ) | <i>Tg:mpeg1-mCherry &amp; Tg:mpo-EGFP</i>        | 488                  | 140                 | 306                 | 394                         | 139                 | 124                 | 327                  | 25                  | 68                  | 345                | 84                  | 122                 |
| Circulating lipids (µm <sup>2</sup> )                        | <i>Tg:flk-EGFP</i>                               | 467                  | 2.4×10 <sup>4</sup> | 3.5×10 <sup>3</sup> | 185                         | 17,829              | 5767                | -                    | -                   | -                   | -                  | -                   | -                   |
| Endothelial surface area (µm <sup>2</sup> )                  | <i>Tg:flk-EGFP</i>                               | 467                  | 4.8×10 <sup>3</sup> | 2.1×10 <sup>3</sup> | 185                         | 6652                | 4198                | -                    | -                   | -                   | -                  | -                   | -                   |

oxLDL: oxidized LDL; co-localization defined by overlap of fluorescence signal. Mean and standard deviation (SD) are shown for normally distributed outcomes; median and interquartile range (IQR) are shown for outcomes showing a negative binomial distribution (shown in italics).

**Supplementary Table 2 - Annotation-based exclusions in the image-based analyses**

| Rationale for exclusion                                               | Traits for which exclusion is relevant                      | Dietary Intervention |                 |                 | Drug treatment intervention |                 |                 | Genetic intervention |                 |                 |                            |                 |                 |
|-----------------------------------------------------------------------|-------------------------------------------------------------|----------------------|-----------------|-----------------|-----------------------------|-----------------|-----------------|----------------------|-----------------|-----------------|----------------------------|-----------------|-----------------|
|                                                                       |                                                             | Available<br>(n)     | Excluded<br>(n) | Excluded<br>(%) | Available<br>(n)            | Excluded<br>(n) | Excluded<br>(%) | Proof-of-concept     |                 |                 | Discovery (19p13.11 locus) |                 |                 |
|                                                                       |                                                             |                      |                 |                 |                             |                 |                 | Available<br>(n)     | Excluded<br>(n) | Excluded<br>(%) | Available<br>(n)           | Excluded<br>(n) | Excluded<br>(%) |
| <b><i>Monodansylpentane cadaverase</i></b>                            |                                                             |                      |                 |                 |                             |                 |                 |                      |                 |                 |                            |                 |                 |
| Inadequate detection of vasculature in Y (vessel missing)             | Lipids, macrophages, neutrophils and their co-localization  | 2050                 | 94              | 4.6             | 927                         | 92              | 9.9             | 231                  | 6               | 2.6             | 212                        | 30              | 14.2            |
| Fish moved during imaging resulting in a bad quality image            | Lipids                                                      | 1959                 | 3               | 0.2             | 873                         | 38              | 4.4             | 225                  | 0               | 0.0             | 183                        | 1               | 0.5             |
| >20% of true negative objects falsely detected (many false positives) | Lipids                                                      | 2043                 | 87              | 4.3             | 853                         | 18              | 2.1             | 278                  | 48              | 17.3            | 219                        | 37              | 16.9            |
| <20% of true positive objects detected (many false negatives)         | Lipids                                                      | 1959                 | 3               | 0.2             | 844                         | 9               | 1.1             | 225                  | 0               | 0.0             | 201                        | 19              | 9.5             |
| <b><i>Tg(IK17:EGFP)</i></b>                                           |                                                             |                      |                 |                 |                             |                 |                 |                      |                 |                 |                            |                 |                 |
| Fish moved during imaging resulting in a bad quality image            | oxLDL                                                       | 893                  | 8               | 0.9             | 238                         | 2               | 0.8             |                      | NA              |                 |                            | NA              |                 |
| >20% of true negative objects falsely detected (many false positives) | No exclusion                                                | 885                  | 202             | 22.8            | 236                         | 100             | 42.4            |                      | NA              |                 |                            | NA              |                 |
| <20% of true positive objects detected (many false negatives)         | No exclusion                                                | 885                  | 1               | 0.1             | 236                         | 0               | 0.0             |                      | NA              |                 |                            | NA              |                 |
| Many false positives outside the area of interest                     | No exclusion                                                | 885                  | 3               | 0.3             | 236                         | 4               | 1.7             |                      | NA              |                 |                            | NA              |                 |
| <b><i>Tg(mpeg1:mCherry)</i></b>                                       |                                                             |                      |                 |                 |                             |                 |                 |                      |                 |                 |                            |                 |                 |
| Fish moved during imaging resulting in a bad quality image            | Macrophages and their co-localization with lipids and oxLDL | 996                  | 2               | 0.2             | 634                         | 1               | 0.2             | 276                  | 0               | 0.0             | 299                        | 3               | 1.0             |
| >20% of true negative objects falsely detected (many false positives) | Macrophages and their co-localization with lipids and oxLDL | 997                  | 3               | 0.3             | 635                         | 2               | 0.3             | 278                  | 2               | 0.7             | 307                        | 11              | 3.6             |
| <20% of true positive objects detected (many false negatives)         | Macrophages and their co-localization with lipids and oxLDL | 1010                 | 16              | 1.6             | 633                         | 0               | 0.0             | 276                  | 0               | 0.0             | 301                        | 5               | 1.7             |
| Presence of (a) moving macrophage(s)                                  | Macrophages and their co-localization with lipids and oxLDL | 994                  | 0               | 0.0             | 634                         | 1               | 0.2             | 276                  | 0               | 0.0             | 298                        | 2               | 0.7             |
| Many false positive macrophages outside the area of interest          | Macrophages and their co-localization with lipids and oxLDL | 996                  | 2               | 0.2             | 634                         | 1               | 0.2             | 276                  | 0               | 0.0             | 311                        | 15              | 4.8             |
| Many macrophages co-localizing                                        |                                                             | 994                  | 0               | 0.0             | 633                         | 0               | 0.0             | 276                  | 0               | 0.0             | 307                        | 11              | 3.6             |
| <b><i>Tg(mpo:EGFP)</i></b>                                            |                                                             |                      |                 |                 |                             |                 |                 |                      |                 |                 |                            |                 |                 |
| <20% of true positive objects detected (many false negatives)         | Neutrophils and their co-localization with lipids           | 537                  | 43              | 8.0             | 404                         | 0               | 0.0             | 278                  | 0               | 0.0             | 299                        | 1               | 0.3             |
| Presence of circulating neutrophils                                   | Neutrophils and their co-localization with lipids           | 504                  | 10              | 2.0             | 409                         | 5               | 1.2             | 278                  | 0               | 0.0             | 301                        | 3               | 1.0             |
| Many neutrophils co-localizing                                        |                                                             | 494                  | 0               | 0.0             | 404                         | 0               | 0.0             | 278                  | 0               | 0.0             | 332                        | 34              | 10.2            |
| <b><i>Bright field</i></b>                                            |                                                             |                      |                 |                 |                             |                 |                 |                      |                 |                 |                            |                 |                 |
| Debris included in the segmentation                                   | Body size                                                   | 2194                 | 1               | 0.0             | 1004                        | 0               | 0.0             | 279                  | 23              | 8.2             | 344                        | 0               | 0.0             |
| Air bubble included in the segmentation                               | Body size                                                   | 2197                 | 4               | 0.2             | 1004                        | 0               | 0.0             | 256                  | 0               | 0.0             | 345                        | 1               | 0.3             |
| Bad segmentation                                                      | Body size                                                   | 2193                 | 0               | 0.0             | 1004                        | 0               | 0.0             | 257                  | 1               | 0.4             | 344                        | 0               | 0.0             |
| Part of the fish not imaged                                           | Body size                                                   | 2202                 | 9               | 0.4             | 1004                        | 0               | 0.0             | 260                  | 4               | 1.5             | 344                        | 0               | 0.0             |
| The fish has a curved body, resulting in a non representative length  | Body size                                                   | 2197                 | 4               | 0.2             | 1004                        | 0               | 0.0             | 256                  | 0               | 0.0             | 345                        | 1               | 0.3             |
| Larvae optically cut off during preprocessing                         | Body size                                                   | 2306                 | 113             | 4.9             | 1004                        | 0               | 0.0             | 256                  | 0               | 0.0             | 344                        | 0               | 0.0             |

Available (n): the number of larvae with a value within mean  $\pm$  5xSD that are free from the image quality-based annotation of interest plus the number of larvae that were excluded due to the quality-based annotation of interest for vascular infiltration by lipids (monodansylpentane cadaverase), oxidized LDL (Tg(IK17:EGFP)), macrophages (Tg(mpeg1:mCherry)), neutrophils (Tg(mpo:EGFP)), and body size (Bright field). For Tg(IK17:EGFP), larvae with many false positive or negative deposits were not excluded from further analysis. For all other traits, larvae with suboptimal image or quantification quality were excluded from further analyses.

**Supplementary Table 3 - The effect of overfeeding and cholesterol supplementation on body size**

|                |                                           | Body length (n=2193) |       |          |        |        |
|----------------|-------------------------------------------|----------------------|-------|----------|--------|--------|
|                |                                           | Effect               | SE    | P        | lci    | uci    |
| fixed factors  | overfeeding                               | 0.350                | 0.040 | 9.15E-23 | 0.280  | 0.420  |
|                | cholesterol supplementation               | -0.220               | 0.040 | 2.32E-07 | -0.300 | -0.140 |
|                | diethyl ether treatment                   | -0.070               | 0.040 | 9.57E-02 | -0.160 | 0.010  |
|                | time of day (in hours since 9AM)          | 0.010                | 0.010 | 1.28E-01 | 0.000  | 0.030  |
|                | intercept                                 | -0.150               | 0.210 | 4.80E-01 | -0.550 | 0.260  |
| random factors | <i>variation by transgenic background</i> | 0.380                | 0.150 | -        | 0.170  | 0.830  |
|                | <i>variation by batch</i>                 | 0.350                | 0.060 | -        | 0.250  | 0.480  |
|                | <i>residual</i>                           | 0.790                | 0.010 | -        | 0.770  | 0.820  |

  

|                |                                           | Dorsal body surface area (n=2193) |       |          |        |        |
|----------------|-------------------------------------------|-----------------------------------|-------|----------|--------|--------|
|                |                                           | Effect                            | SE    | P        | lci    | uci    |
| fixed factors  | overfeeding                               | 0.610                             | 0.030 | 3.54E-71 | 0.540  | 0.680  |
|                | cholesterol supplementation               | -0.050                            | 0.040 | 1.82E-01 | -0.140 | 0.030  |
|                | diethyl ether treatment                   | 0.040                             | 0.040 | 3.84E-01 | -0.050 | 0.120  |
|                | time of day (in hours since 9AM)          | 0.040                             | 0.010 | 6.82E-08 | 0.020  | 0.050  |
|                | intercept                                 | -0.500                            | 0.210 | 1.58E-02 | -0.910 | -0.090 |
| random factors | <i>variation by transgenic background</i> | 0.360                             | 0.160 | -        | 0.150  | 0.870  |
|                | <i>variation by batch</i>                 | 0.420                             | 0.070 | -        | 0.310  | 0.580  |
|                | <i>residual</i>                           | 0.770                             | 0.010 | -        | 0.750  | 0.790  |

  

|                |                                           | Lateral body surface area (n=524) |       |          |        |       |
|----------------|-------------------------------------------|-----------------------------------|-------|----------|--------|-------|
|                |                                           | Effect                            | SE    | P        | lci    | uci   |
| fixed factors  | overfeeding                               | 0.480                             | 0.080 | 1.17E-08 | 0.320  | 0.650 |
|                | cholesterol supplementation               | 0.020                             | 0.100 | 8.69E-01 | -0.170 | 0.210 |
|                | diethyl ether treatment                   | 0.010                             | 0.100 | 9.04E-01 | -0.180 | 0.200 |
|                | time of day (in hours since 9AM)          | 0.020                             | 0.020 | 3.96E-01 | -0.020 | 0.050 |
|                | intercept                                 | -0.310                            | 0.210 | 1.37E-01 | -0.720 | 0.100 |
| random factors | <i>variation by transgenic background</i> | -                                 | -     | -        | -      | -     |
|                | <i>variation by batch</i>                 | 0.390                             | 0.120 | -        | 0.220  | 0.720 |
|                | <i>residual</i>                           | 0.900                             | 0.030 | -        | 0.850  | 0.960 |

  

|                |                                           | Body volume (n=514) |       |          |        |       |
|----------------|-------------------------------------------|---------------------|-------|----------|--------|-------|
|                |                                           | Effect              | SE    | P        | lci    | uci   |
| fixed factors  | overfeeding                               | 0.510               | 0.080 | 5.39E-10 | 0.350  | 0.660 |
|                | cholesterol supplementation               | -0.010              | 0.090 | 9.18E-01 | -0.190 | 0.170 |
|                | diethyl ether treatment                   | -0.010              | 0.090 | 9.25E-01 | -0.190 | 0.170 |
|                | time of day (in hours since 9AM)          | 0.020               | 0.020 | 2.94E-01 | -0.020 | 0.060 |
|                | intercept                                 | -0.300              | 0.230 | 1.85E-01 | -0.750 | 0.150 |
| random factors | <i>variation by transgenic background</i> | -                   | -     | -        | -      | -     |
|                | <i>variation by batch</i>                 | 0.460               | 0.140 | -        | 0.260  | 0.830 |
|                | <i>residual</i>                           | 0.860               | 0.030 | -        | 0.810  | 0.910 |

Dorsal and lateral body surface area and body volume were normalized for body length using residuals. All outcomes were inverse-normally transformed before the analysis. Associations were examined using hierarchical linear models. Effects shown for overfeeding, cholesterol supplementation and diethyl ether treatment are compared with unexposed controls. Lci and uci are lower and upper boundaries of the 95% confidence interval.



**Supplementary Table 4 - The effect of overfeeding and cholesterol supplementation on whole-body lipid and glucose levels**

|                |                                  | LDL cholesterol levels (n=564) |              |          |              |              |
|----------------|----------------------------------|--------------------------------|--------------|----------|--------------|--------------|
|                |                                  | Effect                         | SE           | P        | lci          | uci          |
| fixed factors  | overfeeding                      | -0.072                         | 0.086        | 4.05E-01 | -0.241       | 0.097        |
|                | cholesterol supplementation      | 0.422                          | 0.098        | 1.68E-05 | 0.230        | 0.615        |
|                | diethyl ether treatment          | -0.126                         | 0.099        | 2.00E-01 | -0.320       | 0.067        |
|                | time of day (in hours since 9AM) | -0.006                         | 0.019        | 7.69E-01 | -0.043       | 0.031        |
|                | intercept                        | 0.041                          | 0.172        | 8.10E-01 | -0.296       | 0.379        |
| random factors | <i>variation by batch</i>        | <i>0.261</i>                   | <i>0.089</i> | -        | <i>0.134</i> | <i>0.508</i> |
|                | <i>residual</i>                  | <i>0.952</i>                   | <i>0.028</i> | -        | <i>0.897</i> | <i>1.009</i> |

  

|                |                                  | HDL cholesterol levels (n=594) |              |          |              |              |
|----------------|----------------------------------|--------------------------------|--------------|----------|--------------|--------------|
|                |                                  | Effect                         | SE           | P        | lci          | uci          |
| fixed factors  | overfeeding                      | -0.058                         | 0.083        | 4.83E-01 | -0.221       | 0.105        |
|                | cholesterol supplementation      | -0.170                         | 0.094        | 7.01E-02 | -0.355       | 0.014        |
|                | diethyl ether treatment          | 0.012                          | 0.095        | 8.99E-01 | -0.174       | 0.198        |
|                | time of day (in hours since 9AM) | -0.041                         | 0.018        | 2.18E-02 | -0.077       | -0.006       |
|                | intercept                        | 0.358                          | 0.236        | 1.29E-01 | -0.104       | 0.820        |
| random factors | <i>variation by batch</i>        | <i>0.480</i>                   | <i>0.146</i> | -        | <i>0.264</i> | <i>0.871</i> |
|                | <i>residual</i>                  | <i>0.903</i>                   | <i>0.027</i> | -        | <i>0.850</i> | <i>0.958</i> |

  

|                |                                           | Triglyceride levels (n=2123) |              |          |              |              |
|----------------|-------------------------------------------|------------------------------|--------------|----------|--------------|--------------|
|                |                                           | Effect                       | SE           | P        | lci          | uci          |
| fixed factors  | overfeeding                               | 0.409                        | 0.034        | 5.66E-34 | 0.343        | 0.475        |
|                | cholesterol supplementation               | -0.249                       | 0.040        | 7.98E-10 | -0.328       | -0.169       |
|                | diethyl ether treatment                   | 0.081                        | 0.041        | 5.07E-02 | 0.000        | 0.162        |
|                | time of day (in hours since 9AM)          | -0.042                       | 0.007        | 4.88E-10 | -0.056       | -0.029       |
|                | intercept                                 | 0.068                        | 0.182        | 7.07E-01 | -0.288       | 0.425        |
| random factors | <i>variation by transgenic background</i> | <i>0.253</i>                 | <i>0.178</i> | -        | <i>0.064</i> | <i>1.005</i> |
|                | <i>variation by batch</i>                 | <i>0.574</i>                 | <i>0.096</i> | -        | <i>0.414</i> | <i>0.795</i> |
|                | <i>residual</i>                           | <i>0.750</i>                 | <i>0.012</i> | -        | <i>0.727</i> | <i>0.773</i> |

  

|                |                                           | Total cholesterol levels (n=2123) |              |          |              |              |
|----------------|-------------------------------------------|-----------------------------------|--------------|----------|--------------|--------------|
|                |                                           | Effect                            | SE           | P        | lci          | uci          |
| fixed factors  | overfeeding                               | 0.256                             | 0.032        | 5.93E-16 | 0.194        | 0.318        |
|                | cholesterol supplementation               | 0.193                             | 0.038        | 4.13E-07 | 0.118        | 0.267        |
|                | diethyl ether treatment                   | 0.275                             | 0.039        | 1.54E-12 | 0.199        | 0.351        |
|                | time of day (in hours since 9AM)          | -0.060                            | 0.006        | 1.46E-20 | -0.072       | -0.047       |
|                | intercept                                 | -0.119                            | 0.275        | 6.65E-01 | -0.658       | 0.420        |
| random factors | <i>variation by transgenic background</i> | <i>0.505</i>                      | <i>0.208</i> | -        | <i>0.226</i> | <i>1.133</i> |
|                | <i>variation by batch</i>                 | <i>0.459</i>                      | <i>0.077</i> | -        | <i>0.331</i> | <i>0.637</i> |
|                | <i>residual</i>                           | <i>0.706</i>                      | <i>0.011</i> | -        | <i>0.685</i> | <i>0.727</i> |

  

|                |                                           | Glucose levels (n=2128) |              |          |              |              |
|----------------|-------------------------------------------|-------------------------|--------------|----------|--------------|--------------|
|                |                                           | Effect                  | SE           | P        | lci          | uci          |
| fixed factors  | overfeeding                               | -0.056                  | 0.033        | 9.14E-02 | -0.122       | 0.009        |
|                | cholesterol supplementation               | -0.057                  | 0.040        | 1.57E-01 | -0.135       | 0.022        |
|                | diethyl ether treatment                   | 0.013                   | 0.041        | 7.44E-01 | -0.067       | 0.094        |
|                | time of day (in hours since 9AM)          | 0.003                   | 0.007        | 6.73E-01 | -0.010       | 0.016        |
|                | intercept                                 | 0.102                   | 0.281        | 7.16E-01 | -0.448       | 0.652        |
| random factors | <i>variation by transgenic background</i> | <i>0.512</i>            | <i>0.212</i> | -        | <i>0.227</i> | <i>1.154</i> |
|                | <i>variation by batch</i>                 | <i>0.487</i>            | <i>0.082</i> | -        | <i>0.351</i> | <i>0.677</i> |
|                | <i>residual</i>                           | <i>0.744</i>            | <i>0.011</i> | -        | <i>0.722</i> | <i>0.767</i> |

All outcomes were normalized for protein level using residuals, and inverse-normally transformed before the analysis. Associations were examined using hierarchical linear models and were adjusted for diethyl ether (used to prepare the diet), time of day, transgenic background and batch. Effects shown for overfeeding, cholesterol supplementation and diethyl ether treatment are compared with unexposed controls. Lci and uci are lower and upper boundaries of the 95% confidence interval.

Supplementary Table 5 - The effect of overfeeding and cholesterol supplementation on image-based vascular atherogenic traits

|                                                                                      | Vascular lipid deposition |       |          |        |        |                  |       |          |        |        |                  |       |          |        |        |
|--------------------------------------------------------------------------------------|---------------------------|-------|----------|--------|--------|------------------|-------|----------|--------|--------|------------------|-------|----------|--------|--------|
|                                                                                      | Model 1 (n=1954)          |       |          |        |        | Model 2 (n=1954) |       |          |        |        | Model 3 (n=1769) |       |          |        |        |
|                                                                                      | Effect                    | SE    | P        | lci    | uci    | Effect           | SE    | P        | lci    | uci    | Effect           | SE    | P        | lci    | uci    |
| overfeeding                                                                          | 0.257                     | 0.126 | 4.08E-02 | 0.011  | 0.504  | 0.292            | 0.142 | 4.08E-02 | 0.012  | 0.571  | 0.174            | 0.152 | 2.52E-01 | -0.124 | 0.473  |
| cholesterol supplementation                                                          | -0.029                    | 0.132 | 8.24E-01 | -0.288 | 0.229  | -0.059           | 0.132 | 6.57E-01 | -0.317 | 0.200  | 0.025            | 0.140 | 8.58E-01 | -0.250 | 0.300  |
| diethyl ether treatment                                                              | 0.194                     | 0.154 | 2.07E-01 | -0.107 | 0.495  | 0.190            | 0.151 | 2.08E-01 | -0.106 | 0.486  | 0.094            | 0.156 | 5.47E-01 | -0.212 | 0.400  |
| time of day (in hours since 9AM)                                                     | 0.054                     | 0.020 | 7.74E-03 | 0.014  | 0.094  | 0.056            | 0.021 | 7.55E-03 | 0.015  | 0.098  | 0.070            | 0.023 | 1.97E-03 | 0.026  | 0.115  |
| body length (in SD)                                                                  | -                         | -     | -        | -      | -      | -0.132           | 0.062 | 3.36E-02 | -0.254 | -0.010 | -0.148           | 0.069 | 3.25E-02 | -0.284 | -0.012 |
| dorsal body surface area (in SD)                                                     | -                         | -     | -        | -      | -      | 0.021            | 0.070 | 7.65E-01 | -0.116 | 0.158  | -0.001           | 0.075 | 9.84E-01 | -0.148 | 0.145  |
| triglyceride levels (in SD)                                                          | -                         | -     | -        | -      | -      | -                | -     | -        | -      | -      | 0.222            | 0.084 | 7.96E-03 | 0.058  | 0.386  |
| glucose levels (in SD)                                                               | -                         | -     | -        | -      | -      | -                | -     | -        | -      | -      | -0.047           | 0.068 | 4.91E-01 | -0.181 | 0.087  |
| Tg(hsp70:IK17:EGFP) carriers vs. Tg(mpo:EGFP; mpeg1:mCherry) carriers                | -4.041                    | 0.357 | 1.07E-29 | -4.740 | -3.341 | -4.101           | 0.363 | 1.31E-29 | -4.813 | -3.390 | -3.738           | 0.399 | 7.06E-21 | -4.520 | -2.956 |
| Tg(hsp70:IK17:EGFP; mpeg1:mCherry) carriers vs. Tg(mpo:EGFP; mpeg1:mCherry) carriers | -3.356                    | 0.328 | 1.43E-24 | -3.999 | -2.713 | -3.330           | 0.336 | 4.02E-23 | -3.988 | -2.671 | -3.126           | 0.403 | 8.75E-15 | -3.916 | -2.336 |
| Tg(flk:EGFP) carriers vs. Tg(mpo:EGFP; mpeg1:mCherry) carriers                       | -2.969                    | 0.294 | 5.27E-24 | -3.545 | -2.393 | -3.132           | 0.308 | 3.03E-24 | -3.736 | -2.527 | -3.168           | 0.357 | 6.45E-19 | -3.867 | -2.469 |
| batch 1                                                                              | -0.531                    | 0.192 | 5.69E-03 | -0.907 | -0.154 | -0.514           | 0.201 | 1.07E-02 | -0.909 | -0.119 | -0.438           | 0.217 | 4.40E-02 | -0.864 | -0.012 |
| batch 2                                                                              | 0.671                     | 0.174 | 1.20E-04 | 0.329  | 1.013  | 0.725            | 0.188 | 1.20E-04 | 0.356  | 1.094  | 0.828            | 0.211 | 8.48E-05 | 0.415  | 1.241  |
| batch 3                                                                              | -0.835                    | 0.221 | 1.61E-04 | -1.269 | -0.402 | -0.925           | 0.237 | 9.39E-05 | -1.389 | -0.461 | -0.128           | 0.266 | 6.31E-01 | -0.648 | 0.393  |
| batch 6                                                                              | -0.078                    | 0.246 | 7.50E-01 | -0.559 | 0.403  | -0.110           | 0.248 | 6.59E-01 | -0.596 | 0.377  | -0.128           | 0.266 | 6.31E-01 | -0.648 | 0.393  |
| batch 7                                                                              | -2.103                    | 0.447 | 2.55E-06 | -2.979 | -1.227 | -2.258           | 0.413 | 4.68E-08 | -3.068 | -1.448 | -1.854           | 0.449 | 3.69E-05 | -2.735 | -0.973 |
| batch 9                                                                              | -2.195                    | 0.717 | 2.21E-03 | -3.602 | -0.789 | -2.277           | 0.692 | 9.96E-04 | -3.632 | -0.921 | -2.426           | 0.654 | 2.06E-04 | -3.707 | -1.145 |
| batch 10                                                                             | 0.780                     | 0.469 | 9.65E-02 | -0.140 | 1.699  | 0.710            | 0.474 | 1.34E-01 | -0.219 | 1.639  | 0.674            | 0.479 | 1.59E-01 | -0.265 | 1.613  |
| batch 11                                                                             | -1.900                    | 0.924 | 3.97E-02 | -3.710 | -0.089 | -1.847           | 0.934 | 4.80E-02 | -3.679 | -0.016 | -1.935           | 0.951 | 4.18E-02 | -3.799 | -0.072 |
| batch 12                                                                             | -0.171                    | 0.580 | 7.69E-01 | -1.307 | 0.965  | -0.154           | 0.581 | 7.91E-01 | -1.294 | 0.985  | -0.231           | 0.598 | 6.99E-01 | -1.403 | 0.941  |
| batch 14                                                                             | -0.112                    | 0.600 | 8.52E-01 | -1.289 | 1.065  | 0.014            | 0.614 | 9.82E-01 | -1.189 | 1.218  | 0.004            | 0.618 | 9.94E-01 | -1.208 | 1.217  |
| batch 15                                                                             | 1.295                     | 0.368 | 4.28E-04 | 0.574  | 2.015  | 1.358            | 0.371 | 2.52E-04 | 0.631  | 2.085  | 1.224            | 0.383 | 1.39E-03 | 0.474  | 1.975  |
| batch 16                                                                             | 0.393                     | 0.393 | 3.18E-01 | -0.378 | 1.164  | 0.453            | 0.404 | 2.62E-01 | -0.338 | 1.244  | 0.311            | 0.407 | 4.44E-01 | -0.486 | 1.108  |
| batch 17                                                                             | 1.113                     | 0.386 | 3.91E-03 | 0.357  | 1.868  | 1.161            | 0.398 | 3.57E-03 | 0.380  | 1.942  | 1.009            | 0.408 | 1.34E-02 | 0.209  | 1.810  |
| batch 18                                                                             | 0.390                     | 0.399 | 3.29E-01 | -0.393 | 1.172  | 0.446            | 0.417 | 2.84E-01 | -0.371 | 1.263  | 0.262            | 0.432 | 5.44E-01 | -0.585 | 1.109  |
| batch 20                                                                             | 2.733                     | 0.269 | 3.34E-24 | 2.205  | 3.261  | 2.830            | 0.273 | 3.04E-25 | 2.296  | 3.364  | 3.018            | 0.307 | 8.26E-23 | 2.417  | 3.620  |
| batch 21                                                                             | -0.078                    | 0.321 | 8.08E-01 | -0.707 | 0.551  | -0.019           | 0.318 | 9.53E-01 | -0.642 | 0.605  | 0.412            | 0.358 | 2.50E-01 | -0.290 | 1.114  |
| batch 22                                                                             | 0.398                     | 0.283 | 1.59E-01 | -0.156 | 0.952  | 0.542            | 0.292 | 6.39E-02 | -0.031 | 1.115  | 0.918            | 0.342 | 7.17E-03 | 0.249  | 1.588  |
| batch 23                                                                             | 1.155                     | 0.303 | 1.41E-04 | 0.560  | 1.750  | 1.232            | 0.301 | 4.32E-05 | 0.642  | 1.823  | 1.576            | 0.345 | 4.78E-06 | 0.901  | 2.251  |
| batch 24                                                                             | 1.343                     | 0.300 | 7.63E-06 | 0.755  | 1.931  | 1.441            | 0.303 | 2.01E-06 | 0.847  | 2.035  | 1.737            | 0.339 | 3.05E-07 | 1.072  | 2.403  |
| batch 25                                                                             | 0.211                     | 0.342 | 5.37E-01 | -0.459 | 0.881  | 0.220            | 0.340 | 5.18E-01 | -0.446 | 0.885  | 0.521            | 0.387 | 1.79E-01 | -0.239 | 1.280  |
| batch 26                                                                             | 2.023                     | 0.367 | 3.64E-08 | 1.303  | 2.743  | 1.966            | 0.376 | 1.71E-07 | 1.229  | 2.704  | -                | -     | -        | -      | -      |
| intercept                                                                            | 4.564                     | 0.243 | 1.84E-78 | 4.087  | 5.041  | 4.574            | 0.262 | 4.40E-68 | 4.060  | 5.089  | 4.397            | 0.320 | 6.33E-43 | 3.769  | 5.024  |

negative binomial terms

continued Supplementary Table 5

|                         |                                                                              | Vascular accumulation of oxLDL |       |           |        |        |                 |       |           |        |        |                 |       |           |        |        |
|-------------------------|------------------------------------------------------------------------------|--------------------------------|-------|-----------|--------|--------|-----------------|-------|-----------|--------|--------|-----------------|-------|-----------|--------|--------|
|                         |                                                                              | Model 1 (n=885)                |       |           |        |        | Model 2 (n=885) |       |           |        |        | Model 3 (n=876) |       |           |        |        |
|                         |                                                                              | Effect                         | SE    | P         | lci    | uci    | Effect          | SE    | P         | lci    | uci    | Effect          | SE    | P         | lci    | uci    |
| negative binomial terms | overfeeding                                                                  | 0.291                          | 0.058 | 4.67E-07  | 0.178  | 0.405  | 0.292           | 0.061 | 1.68E-06  | 0.173  | 0.412  | 0.278           | 0.061 | 5.86E-06  | 0.158  | 0.399  |
|                         | cholesterol supplementation                                                  | -0.115                         | 0.069 | 9.52E-02  | -0.249 | 0.020  | -0.097          | 0.070 | 1.62E-01  | -0.234 | 0.039  | -0.094          | 0.072 | 1.92E-01  | -0.234 | 0.047  |
|                         | diethyl ether treatment                                                      | 0.016                          | 0.067 | 8.10E-01  | -0.115 | 0.148  | 0.008           | 0.067 | 9.00E-01  | -0.123 | 0.140  | 0.000           | 0.068 | 9.94E-01  | -0.135 | 0.134  |
|                         | time of day (in hours since 9AM)                                             | 0.020                          | 0.013 | 1.19E-01  | -0.005 | 0.046  | 0.021           | 0.013 | 1.06E-01  | -0.004 | 0.046  | 0.022           | 0.013 | 9.46E-02  | -0.004 | 0.049  |
|                         | body length (in SD)                                                          | -                              | -     | -         | -      | -      | 0.061           | 0.037 | 1.01E-01  | -0.012 | 0.134  | 0.049           | 0.039 | 2.10E-01  | -0.028 | 0.126  |
|                         | dorsal body surface area (in SD)                                             | -                              | -     | -         | -      | -      | -0.021          | 0.039 | 5.90E-01  | -0.099 | 0.056  | -0.029          | 0.041 | 4.78E-01  | -0.110 | 0.052  |
|                         | triglyceride levels (in SD)                                                  | -                              | -     | -         | -      | -      | -               | -     | -         | -      | -      | 0.035           | 0.041 | 3.86E-01  | -0.045 | 0.115  |
|                         | glucose levels (in SD)                                                       | -                              | -     | -         | -      | -      | -               | -     | -         | -      | -      | -0.042          | 0.042 | 3.21E-01  | -0.124 | 0.040  |
|                         | Tg(hsp70:IK17:EGFP; mpeg1:mCherry) carriers vs. Tg(hsp70:IK17:EGFP) carriers | 1.762                          | 0.113 | 4.18E-55  | 1.541  | 1.982  | 1.722           | 0.117 | 2.85E-49  | 1.493  | 1.950  | 1.693           | 0.124 | 2.06E-42  | 1.450  | 1.937  |
|                         | batch 10                                                                     | 1.614                          | 0.097 | 1.23E-62  | 1.425  | 1.804  | 1.650           | 0.098 | 4.11E-63  | 1.457  | 1.842  | 1.688           | 0.112 | 6.37E-51  | 1.467  | 1.908  |
|                         | batch 11                                                                     | 1.475                          | 0.130 | 1.20E-29  | 1.219  | 1.731  | 1.444           | 0.133 | 1.60E-27  | 1.183  | 1.704  | 1.490           | 0.140 | 1.40E-26  | 1.216  | 1.764  |
|                         | batch 12                                                                     | 1.716                          | 0.112 | 6.59E-53  | 1.497  | 1.936  | 1.688           | 0.113 | 3.62E-50  | 1.466  | 1.910  | 1.686           | 0.117 | 8.35E-47  | 1.456  | 1.916  |
|                         | batch 13                                                                     | 0.753                          | 0.127 | 2.72E-09  | 0.505  | 1.002  | 0.746           | 0.129 | 7.24E-09  | 0.494  | 0.999  | 0.753           | 0.129 | 4.94E-09  | 0.501  | 1.005  |
|                         | batch 14                                                                     | -1.255                         | 0.156 | 7.54E-16  | -1.560 | -0.950 | -1.303          | 0.159 | 2.67E-16  | -1.614 | -0.991 | -1.285          | 0.161 | 1.21E-15  | -1.599 | -0.970 |
|                         | batch 15                                                                     | 0.012                          | 0.139 | 9.31E-01  | -0.260 | 0.284  | -0.020          | 0.140 | 8.84E-01  | -0.294 | 0.253  | -0.018          | 0.141 | 8.99E-01  | -0.294 | 0.259  |
|                         | batch 16                                                                     | -0.689                         | 0.135 | 3.64E-07  | -0.955 | -0.424 | -0.706          | 0.138 | 3.17E-07  | -0.977 | -0.435 | -0.729          | 0.143 | 3.32E-07  | -1.009 | -0.449 |
|                         | batch 17                                                                     | -0.708                         | 0.116 | 1.03E-09  | -0.935 | -0.481 | -0.737          | 0.122 | 1.51E-09  | -0.975 | -0.498 | -0.761          | 0.127 | 2.07E-09  | -1.010 | -0.512 |
|                         | batch 18                                                                     | -0.160                         | 0.124 | 1.97E-01  | -0.403 | 0.083  | -0.167          | 0.130 | 2.01E-01  | -0.422 | 0.089  | -0.173          | 0.141 | 2.20E-01  | -0.451 | 0.104  |
|                         | intercept                                                                    | 4.656                          | 0.127 | 7.20E-296 | 4.408  | 4.904  | 4.666           | 0.127 | 1.78E-294 | 4.416  | 4.915  | 4.675           | 0.130 | 9.42E-285 | 4.420  | 4.929  |

|                         |                                                                                      | Vascular infiltration by macrophages |       |          |        |        |                 |       |          |        |        |                 |       |          |        |        |
|-------------------------|--------------------------------------------------------------------------------------|--------------------------------------|-------|----------|--------|--------|-----------------|-------|----------|--------|--------|-----------------|-------|----------|--------|--------|
|                         |                                                                                      | Model 1 (n=994)                      |       |          |        |        | Model 2 (n=994) |       |          |        |        | Model 3 (n=880) |       |          |        |        |
|                         |                                                                                      | Effect                               | SE    | P        | lci    | uci    | Effect          | SE    | P        | lci    | uci    | Effect          | SE    | P        | lci    | uci    |
| negative binomial terms | overfeeding                                                                          | -0.013                               | 0.043 | 7.68E-01 | -0.096 | 0.071  | -0.058          | 0.047 | 2.20E-01 | -0.151 | 0.035  | -0.084          | 0.051 | 1.01E-01 | -0.185 | 0.016  |
|                         | cholesterol supplementation                                                          | 0.066                                | 0.052 | 2.03E-01 | -0.036 | 0.168  | 0.070           | 0.052 | 1.79E-01 | -0.032 | 0.172  | 0.067           | 0.055 | 2.18E-01 | -0.040 | 0.174  |
|                         | diethyl ether treatment                                                              | -0.001                               | 0.051 | 9.86E-01 | -0.101 | 0.099  | 0.025           | 0.052 | 6.30E-01 | -0.077 | 0.126  | 0.012           | 0.053 | 8.25E-01 | -0.093 | 0.117  |
|                         | time of day (in hours since 9AM)                                                     | 0.008                                | 0.008 | 3.39E-01 | -0.008 | 0.023  | 0.002           | 0.008 | 7.70E-01 | -0.014 | 0.019  | 0.015           | 0.009 | 1.05E-01 | -0.003 | 0.033  |
|                         | body length (in SD)                                                                  | -                                    | -     | -        | -      | -      | 0.049           | 0.025 | 4.91E-02 | 0.000  | 0.099  | 0.030           | 0.028 | 2.84E-01 | -0.025 | 0.084  |
|                         | dorsal body surface area (in SD)                                                     | -                                    | -     | -        | -      | -      | 0.048           | 0.026 | 6.45E-02 | -0.003 | 0.098  | 0.047           | 0.028 | 9.53E-02 | -0.008 | 0.102  |
|                         | triglyceride levels (in SD)                                                          | -                                    | -     | -        | -      | -      | -               | -     | -        | -      | -      | 0.063           | 0.039 | 1.07E-01 | -0.014 | 0.141  |
|                         | glucose levels (in SD)                                                               | -                                    | -     | -        | -      | -      | -               | -     | -        | -      | -      | -0.115          | 0.029 | 6.12E-05 | -0.171 | -0.059 |
|                         | Tg(hsp70:IK17:EGFP; mpeg1:mCherry) carriers vs. Tg(mpo:EGFP; mpeg1:mCherry) carriers | -0.969                               | 0.087 | 1.09E-28 | -1.140 | -0.798 | -1.016          | 0.088 | 7.75E-31 | -1.188 | -0.844 | -1.054          | 0.116 | 8.06E-20 | -1.281 | -0.828 |
|                         | batch 1                                                                              | -0.065                               | 0.076 | 3.91E-01 | -0.213 | 0.083  | -0.093          | 0.076 | 2.21E-01 | -0.241 | 0.056  | -0.036          | 0.076 | 6.37E-01 | -0.185 | 0.113  |
|                         | batch 2                                                                              | -0.035                               | 0.080 | 6.61E-01 | -0.192 | 0.122  | -0.087          | 0.081 | 2.88E-01 | -0.246 | 0.073  | 0.007           | 0.086 | 9.34E-01 | -0.162 | 0.177  |
|                         | batch 3                                                                              | -1.359                               | 0.102 | 7.57E-41 | -1.558 | -1.160 | -1.379          | 0.107 | 7.15E-38 | -1.589 | -1.169 |                 |       |          |        |        |
|                         | batch 6                                                                              | 0.038                                | 0.092 | 6.83E-01 | -0.143 | 0.218  | 0.028           | 0.093 | 7.65E-01 | -0.154 | 0.210  | 0.224           | 0.103 | 3.01E-02 | 0.022  | 0.427  |
|                         | batch 7                                                                              | -1.959                               | 0.108 | 5.69E-74 | -2.170 | -1.748 | -1.949          | 0.109 | 3.42E-71 | -2.164 | -1.735 | -1.818          | 0.139 | 7.74E-39 | -2.091 | -1.544 |
|                         | batch 14                                                                             | -0.539                               | 0.122 | 9.91E-06 | -0.778 | -0.300 | -0.488          | 0.125 | 9.08E-05 | -0.733 | -0.244 | -0.415          | 0.127 | 1.04E-03 | -0.663 | -0.167 |
|                         | batch 15                                                                             | -0.233                               | 0.091 | 1.03E-02 | -0.411 | -0.055 | -0.240          | 0.090 | 7.44E-03 | -0.416 | -0.064 | -0.271          | 0.090 | 2.58E-03 | -0.448 | -0.095 |
|                         | batch 16                                                                             | -1.115                               | 0.116 | 6.04E-22 | -1.342 | -0.888 | -1.059          | 0.119 | 7.06E-19 | -1.293 | -0.825 | -1.062          | 0.123 | 0.000    | -1.302 | -0.822 |

continued Supplementary Table 5

|  |           | Vascular infiltration by macrophages |       |          |        |        |                 |       |          |        |        |                 |       |          |        |        |
|--|-----------|--------------------------------------|-------|----------|--------|--------|-----------------|-------|----------|--------|--------|-----------------|-------|----------|--------|--------|
|  |           | Model 1 (n=994)                      |       |          |        |        | Model 2 (n=994) |       |          |        |        | Model 3 (n=880) |       |          |        |        |
|  |           | Effect                               | SE    | P        | lci    | uci    | Effect          | SE    | P        | lci    | uci    | Effect          | SE    | P        | lci    | uci    |
|  | batch 17  | -0.973                               | 0.103 | 4.04E-21 | -1.175 | -0.771 | -0.916          | 0.107 | 1.03E-17 | -1.125 | -0.706 | -0.945          | 0.111 | 1.35E-17 | -1.162 | -0.728 |
|  | batch 18  | -0.221                               | 0.082 | 6.77E-03 | -0.381 | -0.061 | -0.154          | 0.087 | 7.83E-02 | -0.325 | 0.017  | -0.119          | 0.095 | 2.10E-01 | -0.305 | 0.067  |
|  | intercept | 7.880                                | 0.095 | 0.00E+00 | 7.694  | 8.066  | 7.921           | 0.099 | 0.00E+00 | 7.727  | 8.114  | 7.836           | 0.122 | 0.00E+00 | 7.597  | 8.074  |

  

|                         |                                                                                      | Vascular co-localization of lipids with macrophages |          |          |        |        |                 |          |          |        |        |                 |          |          |        |        |
|-------------------------|--------------------------------------------------------------------------------------|-----------------------------------------------------|----------|----------|--------|--------|-----------------|----------|----------|--------|--------|-----------------|----------|----------|--------|--------|
|                         |                                                                                      | Model 1 (n=870)                                     |          |          |        |        | Model 2 (n=870) |          |          |        |        | Model 3 (n=763) |          |          |        |        |
|                         |                                                                                      | Effect                                              | SE       | P        | lci    | uci    | Effect          | SE       | P        | lci    | uci    | Effect          | SE       | P        | lci    | uci    |
| negative binomial terms | overfeeding                                                                          | 0.273                                               | 0.225    | 2.26E-01 | -0.169 | 0.714  | 0.195           | 0.248    | 4.31E-01 | -0.291 | 0.680  | 0.251           | 0.285    | 3.78E-01 | -0.307 | 0.810  |
|                         | cholesterol supplementation                                                          | 0.383                                               | 0.315    | 2.24E-01 | -0.235 | 1.001  | 0.356           | 0.312    | 2.54E-01 | -0.256 | 0.968  | 0.554           | 0.354    | 1.18E-01 | -0.140 | 1.248  |
|                         | diethyl ether treatment                                                              | 0.291                                               | 0.291    | 3.16E-01 | -0.279 | 0.861  | 0.207           | 0.283    | 4.65E-01 | -0.348 | 0.762  | 0.281           | 0.297    | 3.43E-01 | -0.301 | 0.863  |
|                         | time of day (in hours since 9AM)                                                     | 0.005                                               | 0.045    | 9.17E-01 | -0.084 | 0.093  | -0.002          | 0.046    | 9.63E-01 | -0.092 | 0.087  | 0.040           | 0.050    | 4.24E-01 | -0.058 | 0.139  |
|                         | body length (in SD)                                                                  | -                                                   | -        | -        | -      | -      | -0.240          | 0.131    | 6.64E-02 | -0.496 | 0.016  | -0.185          | 0.138    | 1.79E-01 | -0.454 | 0.085  |
|                         | dorsal body surface area (in SD)                                                     | -                                                   | -        | -        | -      | -      | 0.266           | 0.154    | 8.42E-02 | -0.036 | 0.567  | 0.220           | 0.165    | 1.82E-01 | -0.103 | 0.543  |
|                         | triglyceride levels (in SD)                                                          | -                                                   | -        | -        | -      | -      | -               | -        | -        | -      | -      | 0.404           | 0.186    | 3.04E-02 | 0.038  | 0.769  |
|                         | glucose levels (in SD)                                                               | -                                                   | -        | -        | -      | -      | -               | -        | -        | -      | -      | -0.112          | 0.151    | 4.60E-01 | -0.408 | 0.184  |
|                         | Tg(hsp70:IK17:EGFP; mpeg1:mCherry) carriers vs. Tg(mpo:EGFP; mpeg1:mCherry) carriers | -3.913                                              | 0.563    | 3.64E-12 | -5.017 | -2.810 | -4.177          | 0.517    | 6.76E-16 | -5.191 | -3.163 | -3.914          | 0.688    | 1.26E-08 | -5.262 | -2.566 |
|                         | batch 1                                                                              | -0.741                                              | 0.313    | 1.80E-02 | -1.355 | -0.127 | -0.868          | 0.337    | 9.93E-03 | -1.527 | -0.208 | -0.767          | 0.356    | 3.12E-02 | -1.465 | -0.069 |
|                         | batch 2                                                                              | 0.644                                               | 0.302    | 3.30E-02 | 0.052  | 1.236  | 0.543           | 0.322    | 9.21E-02 | -0.089 | 1.174  | 0.783           | 0.376    | 3.72E-02 | 0.046  | 1.520  |
|                         | batch 3                                                                              | -1.767                                              | 0.447    | 7.63E-05 | -2.642 | -0.891 | -2.255          | 0.461    | 9.94E-07 | -3.158 | -1.352 | -               | -        | -        | -      | -      |
|                         | batch 6                                                                              | 0.078                                               | 0.373    | 8.35E-01 | -0.654 | 0.809  | -0.159          | 0.373    | 6.70E-01 | -0.889 | 0.572  | -0.109          | 0.412    | 7.91E-01 | -0.916 | 0.698  |
|                         | batch 7                                                                              | -3.258                                              | 0.617    | 1.28E-07 | -4.467 | -2.049 | -3.685          | 0.634    | 6.18E-09 | -4.928 | -2.442 | -2.598          | 0.836    | 1.88E-03 | -4.237 | -0.960 |
|                         | batch 15                                                                             | 1.239                                               | 0.602    | 3.95E-02 | 0.060  | 2.419  | 1.372           | 0.557    | 1.38E-02 | 0.280  | 2.464  | 1.256           | 0.544    | 2.10E-02 | 0.189  | 2.323  |
|                         | batch 16                                                                             | -1.544                                              | 1.034    | 1.35E-01 | -3.572 | 0.483  | -1.250          | 1.019    | 2.20E-01 | -3.247 | 0.747  | -1.460          | 0.973    | 1.33E-01 | -3.366 | 0.446  |
|                         | batch 17                                                                             | 0.324                                               | 0.660    | 6.23E-01 | -0.969 | 1.617  | 0.760           | 0.633    | 2.30E-01 | -0.481 | 2.002  | 0.474           | 0.665    | 4.75E-01 | -0.828 | 1.777  |
|                         | batch 18                                                                             | 0.546                                               | 0.972    | 5.74E-01 | -1.358 | 2.451  | 1.085           | 0.981    | 2.69E-01 | -0.838 | 3.009  | 0.882           | 0.967    | 3.62E-01 | -1.014 | 2.778  |
| intercept               | 3.297                                                                                | 0.490                                               | 1.65E-11 | 2.338    | 4.257  | 3.610  | 0.510           | 1.45E-12 | 2.610    | 4.609  | 2.839  | 0.650           | 1.27E-05 | 1.565    | 4.114  |        |

  

|                         |                                  | Vascular co-localization of oxLDL with macrophages |       |          |        |        |                 |       |          |        |        |                 |       |          |        |        |
|-------------------------|----------------------------------|----------------------------------------------------|-------|----------|--------|--------|-----------------|-------|----------|--------|--------|-----------------|-------|----------|--------|--------|
|                         |                                  | Model 1 (n=433)                                    |       |          |        |        | Model 2 (n=433) |       |          |        |        | Model 3 (n=430) |       |          |        |        |
|                         |                                  | Effect                                             | SE    | P        | lci    | uci    | Effect          | SE    | P        | lci    | uci    | Effect          | SE    | P        | lci    | uci    |
| negative binomial terms | overfeeding                      | 0.447                                              | 0.138 | 1.22E-03 | 0.176  | 0.717  | 0.456           | 0.145 | 1.67E-03 | 0.172  | 0.741  | 0.407           | 0.146 | 5.33E-03 | 0.121  | 0.694  |
|                         | cholesterol supplementation      | -0.372                                             | 0.154 | 1.55E-02 | -0.674 | -0.071 | -0.389          | 0.156 | 1.27E-02 | -0.695 | -0.083 | -0.357          | 0.158 | 2.39E-02 | -0.667 | -0.047 |
|                         | diethyl ether treatment          | -0.109                                             | 0.146 | 4.53E-01 | -0.394 | 0.176  | -0.113          | 0.147 | 4.41E-01 | -0.401 | 0.175  | -0.156          | 0.148 | 2.91E-01 | -0.446 | 0.134  |
|                         | time of day (in hours since 9AM) | 0.061                                              | 0.028 | 2.73E-02 | 0.007  | 0.115  | 0.064           | 0.029 | 2.59E-02 | 0.008  | 0.120  | 0.075           | 0.030 | 1.21E-02 | 0.016  | 0.133  |
|                         | body length (in SD)              | -                                                  | -     | -        | -      | -      | -0.064          | 0.090 | 4.79E-01 | -0.241 | 0.113  | -0.182          | 0.107 | 8.77E-02 | -0.392 | 0.027  |
|                         | dorsal body surface area (in SD) | -                                                  | -     | -        | -      | -      | -0.027          | 0.081 | 7.42E-01 | -0.186 | 0.133  | -0.144          | 0.097 | 1.37E-01 | -0.334 | 0.046  |
|                         | triglyceride levels (in SD)      | -                                                  | -     | -        | -      | -      | -               | -     | -        | -      | -      | 0.348           | 0.161 | 3.06E-02 | 0.032  | 0.663  |
|                         | glucose levels (in SD)           | -                                                  | -     | -        | -      | -      | -               | -     | -        | -      | -      | -0.288          | 0.141 | 4.18E-02 | -0.565 | -0.011 |
|                         | batch 15                         | 0.693                                              | 0.254 | 6.40E-03 | 0.195  | 1.192  | 0.727           | 0.273 | 7.76E-03 | 0.192  | 1.262  | 0.491           | 0.302 | 1.04E-01 | -0.101 | 1.084  |
|                         | batch 16                         | 0.549                                              | 0.290 | 5.82E-02 | -0.019 | 1.118  | 0.527           | 0.288 | 6.68E-02 | -0.036 | 1.091  | 0.217           | 0.326 | 5.04E-01 | -0.421 | 0.856  |
|                         | batch 17                         | -0.225                                             | 0.262 | 3.90E-01 | -0.738 | 0.288  | -0.234          | 0.263 | 3.73E-01 | -0.750 | 0.281  | -0.652          | 0.310 | 3.55E-02 | -1.260 | -0.044 |
|                         | batch 18                         | 0.715                                              | 0.248 | 3.97E-03 | 0.228  | 1.201  | 0.690           | 0.251 | 5.96E-03 | 0.198  | 1.181  | 0.406           | 0.289 | 1.60E-01 | -0.160 | 0.972  |

continued Supplementary Table 5

|  |                  | Vascular co-localization of oxLDL with macrophages |       |          |       |       |                 |       |          |       |       |                 |       |          |       |       |
|--|------------------|----------------------------------------------------|-------|----------|-------|-------|-----------------|-------|----------|-------|-------|-----------------|-------|----------|-------|-------|
|  |                  | Model 1 (n=433)                                    |       |          |       |       | Model 2 (n=433) |       |          |       |       | Model 3 (n=430) |       |          |       |       |
|  |                  | Effect                                             | SE    | P        | lci   | uci   | Effect          | SE    | P        | lci   | uci   | Effect          | SE    | P        | lci   | uci   |
|  | <b>batch 19</b>  | 0.869                                              | 0.236 | 2.26E-04 | 0.407 | 1.331 | 0.892           | 0.259 | 5.72E-04 | 0.385 | 1.400 | 0.805           | 0.273 | 3.16E-03 | 0.270 | 1.340 |
|  | <b>intercept</b> | 2.076                                              | 0.278 | 7.97E-14 | 1.531 | 2.620 | 2.082           | 0.303 | 6.85E-12 | 1.487 | 2.677 | 2.052           | 0.313 | 5.92E-11 | 1.438 | 2.666 |

  

|                         |                                         | Vascular infiltration by neutrophils |       |          |          |        |                 |       |          |          |        |                 |       |          |          |        |
|-------------------------|-----------------------------------------|--------------------------------------|-------|----------|----------|--------|-----------------|-------|----------|----------|--------|-----------------|-------|----------|----------|--------|
|                         |                                         | Model 1 (n=494)                      |       |          |          |        | Model 2 (n=494) |       |          |          |        | Model 3 (n=395) |       |          |          |        |
|                         |                                         | Effect                               | SE    | P        | lci      | uci    | Effect          | SE    | P        | lci      | uci    | Effect          | SE    | P        | lci      | uci    |
| negative binomial terms | <b>overfeeding</b>                      | 0.199                                | 0.054 | 2.59E-04 | 0.092    | 0.306  | 0.131           | 0.063 | 3.80E-02 | 0.007    | 0.255  | 0.196           | 0.069 | 4.64E-03 | 0.060    | 0.332  |
|                         | <b>cholesterol supplementation</b>      | 0.046                                | 0.069 | 5.07E-01 | -0.090   | 0.181  | 0.045           | 0.069 | 5.13E-01 | -0.091   | 0.181  | 0.183           | 0.074 | 1.39E-02 | 0.037    | 0.329  |
|                         | <b>diethyl ether treatment</b>          | -0.033                               | 0.066 | 6.15E-01 | -0.164   | 0.097  | 0.001           | 0.066 | 9.87E-01 | -0.128   | 0.130  | 0.018           | 0.070 | 8.00E-01 | -0.120   | 0.156  |
|                         | <b>time of day (in hours since 9AM)</b> | 0.033                                | 0.011 | 2.07E-03 | 0.012    | 0.053  | 0.023           | 0.011 | 4.32E-02 | 0.001    | 0.045  | 0.026           | 0.013 | 4.46E-02 | 0.001    | 0.051  |
|                         | <b>body length (in SD)</b>              | -                                    | -     | -        | -        | -      | 0.054           | 0.030 | 7.75E-02 | -0.006   | 0.113  | 0.059           | 0.035 | 9.34E-02 | -0.010   | 0.129  |
|                         | <b>dorsal body surface area (in SD)</b> | -                                    | -     | -        | -        | -      | 0.071           | 0.038 | 6.56E-02 | -0.005   | 0.146  | 0.032           | 0.042 | 4.49E-01 | -0.051   | 0.115  |
|                         | <b>triglyceride levels (in SD)</b>      | -                                    | -     | -        | -        | -      | -               | -     | -        | -        | -      | -0.077          | 0.056 | 1.70E-01 | -0.187   | 0.033  |
|                         | <b>glucose levels (in SD)</b>           | -                                    | -     | -        | -        | -      | -               | -     | -        | -        | -      | -0.053          | 0.036 | 1.41E-01 | -0.124   | 0.018  |
|                         | <b>batch 1</b>                          | -0.209                               | 0.086 | 1.56E-02 | -0.378   | -0.040 | -0.263          | 0.088 | 2.74E-03 | -0.435   | -0.091 | -0.260          | 0.088 | 3.21E-03 | -0.434   | -0.087 |
|                         | <b>batch 2</b>                          | -0.245                               | 0.086 | 4.45E-03 | -0.414   | -0.076 | -0.330          | 0.087 | 1.46E-04 | -0.500   | -0.159 | -0.343          | 0.092 | 1.98E-04 | -0.524   | -0.163 |
|                         | <b>batch 3</b>                          | -1.742                               | 0.109 | 2.22E-57 | -1.956   | -1.528 | -1.816          | 0.116 | 1.85E-55 | -2.043   | -1.589 | -               | -     | -        | -        | -      |
|                         | <b>batch 6</b>                          | -0.071                               | 0.118 | 5.47E-01 | -0.301   | 0.160  | -0.114          | 0.116 | 3.25E-01 | -0.342   | 0.113  | -0.072          | 0.137 | 5.97E-01 | -0.341   | 0.196  |
|                         | <b>batch 7</b>                          | -2.087                               | 0.105 | 2.93E-88 | -2.293   | -1.882 | -2.121          | 0.107 | 5.84E-87 | -2.331   | -1.910 | -2.310          | 0.167 | 1.11E-43 | -2.636   | -1.983 |
|                         |                                         | <b>intercept</b>                     | 7.658 | 0.105    | 0.00E+00 | 7.451  | 7.864           | 7.760 | 0.115    | 0.00E+00 | 7.534  | 7.985           | 7.776 | 0.152    | 0.00E+00 | 7.479  |

  

|                         |                                         | Vascular co-localization of lipids with neutrophils |       |          |          |        |                 |       |          |          |        |                 |       |          |          |        |       |
|-------------------------|-----------------------------------------|-----------------------------------------------------|-------|----------|----------|--------|-----------------|-------|----------|----------|--------|-----------------|-------|----------|----------|--------|-------|
|                         |                                         | Model 1 (n=380)                                     |       |          |          |        | Model 2 (n=380) |       |          |          |        | Model 3 (n=286) |       |          |          |        |       |
|                         |                                         | Effect                                              | SE    | P        | lci      | uci    | Effect          | SE    | P        | lci      | uci    | Effect          | SE    | P        | lci      | uci    |       |
| negative binomial terms | <b>overfeeding</b>                      | 0.727                                               | 0.246 | 3.07E-03 | 0.246    | 1.209  | 0.826           | 0.251 | 1.02E-03 | 0.333    | 1.319  | 0.901           | 0.255 | 4.01E-04 | 0.402    | 1.401  |       |
|                         | <b>cholesterol supplementation</b>      | 0.845                                               | 0.284 | 2.89E-03 | 0.289    | 1.401  | 0.830           | 0.280 | 2.98E-03 | 0.282    | 1.378  | 0.882           | 0.306 | 3.95E-03 | 0.282    | 1.482  |       |
|                         | <b>diethyl ether treatment</b>          | -0.659                                              | 0.319 | 3.91E-02 | -1.285   | -0.033 | -0.744          | 0.325 | 2.21E-02 | -1.381   | -0.107 | -0.258          | 0.286 | 3.66E-01 | -0.819   | 0.302  |       |
|                         | <b>time of day (in hours since 9AM)</b> | 0.017                                               | 0.050 | 7.40E-01 | -0.082   | 0.115  | 0.039           | 0.054 | 4.64E-01 | -0.066   | 0.144  | 0.049           | 0.053 | 3.58E-01 | -0.055   | 0.152  |       |
|                         | <b>body length (in SD)</b>              | -                                                   | -     | -        | -        | -      | -0.151          | 0.140 | 2.82E-01 | -0.425   | 0.124  | -0.059          | 0.129 | 6.46E-01 | -0.312   | 0.194  |       |
|                         | <b>dorsal body surface area (in SD)</b> | -                                                   | -     | -        | -        | -      | -0.088          | 0.162 | 5.88E-01 | -0.405   | 0.230  | -0.082          | 0.175 | 6.38E-01 | -0.426   | 0.261  |       |
|                         | <b>triglyceride levels (in SD)</b>      | -                                                   | -     | -        | -        | -      | -               | -     | -        | -        | -      | 0.102           | 0.208 | 6.23E-01 | -0.305   | 0.509  |       |
|                         | <b>glucose levels (in SD)</b>           | -                                                   | -     | -        | -        | -      | -               | -     | -        | -        | -      | 0.132           | 0.127 | 2.98E-01 | -0.117   | 0.381  |       |
|                         | <b>batch 1</b>                          | -0.804                                              | 0.340 | 1.79E-02 | -1.469   | -0.138 | -0.701          | 0.378 | 6.37E-02 | -1.441   | 0.040  | -0.804          | 0.353 | 2.27E-02 | -1.497   | -0.112 |       |
|                         | <b>batch 2</b>                          | 0.117                                               | 0.356 | 7.41E-01 | -0.580   | 0.815  | 0.289           | 0.402 | 4.73E-01 | -0.500   | 1.077  | 0.391           | 0.414 | 3.45E-01 | -0.421   | 1.203  |       |
|                         | <b>batch 3</b>                          | -2.749                                              | 0.523 | 1.44E-07 | -3.774   | -1.725 | -2.714          | 0.572 | 2.05E-06 | -3.834   | -1.594 | -               | -     | -        | -        | -      |       |
|                         | <b>batch 6</b>                          | -0.652                                              | 0.441 | 1.40E-01 | -1.517   | 0.213  | -0.557          | 0.462 | 2.28E-01 | -1.462   | 0.349  | -0.510          | 0.464 | 2.71E-01 | -1.420   | 0.399  |       |
|                         |                                         | <b>intercept</b>                                    | 2.288 | 0.576    | 7.12E-05 | 1.159  | 3.416           | 2.105 | 0.602    | 4.69E-04 | 0.925  | 3.284           | 1.409 | 0.679    | 3.79E-02 | 0.079  | 2.740 |

continued Supplementary Table 5

|                         |                                  | Vascular co-localization of macrophages with neutrophils |           |          |        |        |                 |           |          |        |        |                 |          |          |        |        |
|-------------------------|----------------------------------|----------------------------------------------------------|-----------|----------|--------|--------|-----------------|-----------|----------|--------|--------|-----------------|----------|----------|--------|--------|
|                         |                                  | Model 1 (n=488)                                          |           |          |        |        | Model 2 (n=488) |           |          |        |        | Model 3 (n=392) |          |          |        |        |
|                         |                                  | Effect                                                   | SE        | P        | lci    | uci    | Effect          | SE        | P        | lci    | uci    | Effect          | SE       | P        | lci    | uci    |
| negative binomial terms | overfeeding                      | 0.096                                                    | 0.104     | 3.55E-01 | -0.107 | 0.299  | -0.019          | 0.115     | 8.67E-01 | -0.244 | 0.205  | 0.060           | 0.113    | 5.99E-01 | -0.162 | 0.281  |
|                         | cholesterol supplementation      | 0.153                                                    | 0.133     | 2.50E-01 | -0.108 | 0.413  | 0.119           | 0.136     | 3.81E-01 | -0.147 | 0.385  | 0.299           | 0.127    | 1.90E-02 | 0.049  | 0.549  |
|                         | diethyl ether treatment          | -0.240                                                   | 0.136     | 7.75E-02 | -0.506 | 0.026  | -0.164          | 0.136     | 2.27E-01 | -0.430 | 0.102  | -0.164          | 0.133    | 2.18E-01 | -0.426 | 0.097  |
|                         | time of day (in hours since 9AM) | -0.007                                                   | 0.021     | 7.39E-01 | -0.048 | 0.034  | -0.027          | 0.023     | 2.42E-01 | -0.072 | 0.018  | -0.009          | 0.026    | 7.23E-01 | -0.059 | 0.041  |
|                         | body length (in SD)              | -                                                        | -         | -        | -      | -      | 0.034           | 0.054     | 5.27E-01 | -0.071 | 0.139  | -0.022          | 0.054    | 6.84E-01 | -0.127 | 0.083  |
|                         | dorsal body surface area (in SD) | -                                                        | -         | -        | -      | -      | 0.170           | 0.067     | 1.08E-02 | 0.039  | 0.302  | 0.097           | 0.068    | 1.55E-01 | -0.037 | 0.231  |
|                         | triglyceride levels (in SD)      | -                                                        | -         | -        | -      | -      | -               | -         | -        | -      | -      | 0.231           | 0.089    | 9.49E-03 | 0.056  | 0.405  |
|                         | glucose levels (in SD)           | -                                                        | -         | -        | -      | -      | -               | -         | -        | -      | -      | -0.153          | 0.066    | 1.96E-02 | -0.282 | -0.025 |
|                         | batch 1                          | 0.223                                                    | 0.131     | 8.87E-02 | -0.034 | 0.479  | 0.090           | 0.146     | 5.34E-01 | -0.195 | 0.376  | 0.225           | 0.145    | 1.21E-01 | -0.059 | 0.509  |
|                         | batch 2                          | -0.355                                                   | 0.150     | 1.79E-02 | -0.650 | -0.061 | -0.523          | 0.166     | 1.59E-03 | -0.848 | -0.198 | -0.336          | 0.175    | 5.57E-02 | -0.679 | 0.008  |
|                         | batch 3                          | -2.971                                                   | 0.240     | 4.01E-35 | -3.441 | -2.500 | -3.183          | 0.279     | 3.32E-30 | -3.729 | -2.637 | -               | -        | -        | -      | -      |
|                         | batch 6                          | 0.175                                                    | 0.191     | 3.60E-01 | -0.199 | 0.549  | 0.059           | 0.199     | 7.67E-01 | -0.331 | 0.448  | 0.426           | 0.232    | 6.61E-02 | -0.028 | 0.880  |
| batch 7                 | -4.803                           | 0.258                                                    | 1.43E-77  | -5.308   | -4.298 | -4.918 | 0.274           | 3.21E-72  | -5.454   | -4.382 | -4.433 | 0.338           | 2.72E-39 | -5.096   | -3.771 |        |
| intercept               | 5.839                            | 0.218                                                    | 1.63E-158 | 5.412    | 6.266  | 6.054  | 0.250           | 5.85E-130 | 5.565    | 6.543  | 5.617  | 0.302           | 2.18E-77 | 5.026    | 6.208  |        |

  

|                 |                                  | Endothelial thickness     |              |              |              |              |                 |              |              |              |              |                 |              |              |              |              |
|-----------------|----------------------------------|---------------------------|--------------|--------------|--------------|--------------|-----------------|--------------|--------------|--------------|--------------|-----------------|--------------|--------------|--------------|--------------|
|                 |                                  | Model 1 (n=467)           |              |              |              |              | Model 2 (n=467) |              |              |              |              | Model 3 (n=411) |              |              |              |              |
|                 |                                  | Effect                    | SE           | P            | lci          | uci          | Effect          | SE           | P            | lci          | uci          | Effect          | SE           | P            | lci          | uci          |
| fixed factors   | overfeeding                      | 0.252                     | 0.073        | 5.34E-04     | 0.109        | 0.395        | 0.176           | 0.079        | 2.69E-02     | 0.020        | 0.331        | 0.171           | 0.089        | 5.47E-02     | -0.003       | 0.346        |
|                 | cholesterol supplementation      | 0.091                     | 0.082        | 2.65E-01     | -0.069       | 0.252        | 0.115           | 0.082        | 1.60E-01     | -0.045       | 0.276        | 0.119           | 0.090        | 1.89E-01     | -0.058       | 0.296        |
|                 | diethyl ether treatment          | -0.320                    | 0.087        | 2.40E-04     | -0.490       | -0.149       | -0.330          | 0.087        | 1.42E-04     | -0.500       | -0.160       | -0.337          | 0.096        | 4.13E-04     | -0.525       | -0.150       |
|                 | time of day (in hours since 9AM) | 0.065                     | 0.014        | 1.43E-06     | 0.039        | 0.092        | 0.066           | 0.013        | 8.20E-07     | 0.040        | 0.093        | 0.076           | 0.015        | 2.11E-07     | 0.048        | 0.105        |
|                 | body length (in SD)              | -                         | -            | -            | -            | -            | 0.063           | 0.043        | 1.39E-01     | -0.020       | 0.147        | 0.033           | 0.049        | 5.06E-01     | -0.064       | 0.129        |
|                 | dorsal body surface area (in SD) | -                         | -            | -            | -            | -            | 0.073           | 0.040        | 6.63E-02     | -0.005       | 0.150        | 0.076           | 0.043        | 7.67E-02     | -0.008       | 0.161        |
|                 | triglyceride levels (in SD)      | -                         | -            | -            | -            | -            | -               | -            | -            | -            | -            | 0.023           | 0.041        | 5.73E-01     | -0.057       | 0.104        |
|                 | glucose levels (in SD)           | -                         | -            | -            | -            | -            | -               | -            | -            | -            | -            | 0.045           | 0.043        | 3.00E-01     | -0.040       | 0.129        |
|                 | intercept                        | -0.445                    | 0.259        | 8.56E-02     | -0.953       | 0.062        | -0.378          | 0.262        | 1.49E-01     | -0.890       | 0.135        | -0.366          | 0.288        | 2.04E-01     | -0.930       | 0.198        |
|                 | random factors                   | <i>variation by batch</i> | <i>0.672</i> | <i>0.173</i> | -            | <i>0.405</i> | <i>1.113</i>    | <i>0.676</i> | <i>0.174</i> | -            | <i>0.408</i> | <i>1.120</i>    | <i>0.693</i> | <i>0.192</i> | -            | <i>0.402</i> |
| <i>residual</i> |                                  | <i>0.703</i>              | <i>0.023</i> | -            | <i>0.659</i> | <i>0.750</i> | <i>0.698</i>    | <i>0.023</i> | -            | <i>0.655</i> | <i>0.745</i> | <i>0.716</i>    | <i>0.025</i> | -            | <i>0.669</i> | <i>0.767</i> |

Endothelial thickness is defined as surface area of the endothelium normalized for surface area of the circulating lipids. Associations were examined using negative binomial regression for outcomes that showed a negative binomial distribution; and using hierarchical linear models on inverse normally transformed outcomes for outcomes that were (borderline) normally distributed (i.e. endothelial thickness). Model 1: adjusted for diethyl ether (used to prepare the diet), time of day, transgenic background and batch; Model 2: additionally adjusted for body length and dorsal body surface area; Model 3: additionally adjusted for whole-body triglyceride and glucose levels. Dorsal body surface area was normalized for body length using residuals; whole-body triglyceride and glucose levels were normalized for protein level using residuals. Effects shown for overfeeding, cholesterol supplementation and diethyl ether treatment are compared with unexposed controls. Lci and uci are lower and upper boundaries of the 95% confidence interval.

Supplementary Table 6 - The effect of overfeeding and cholesterol supplementation on suboptimal image or quantification quality

| Larva optically cut during pre-processing |       |       |          |       |       |
|-------------------------------------------|-------|-------|----------|-------|-------|
| Model 1 (n=2306)                          |       |       |          |       |       |
|                                           | OR    | SE    | P        | lci   | uci   |
| overfeeding                               | 1.450 | 0.290 | 6.52E-02 | 0.980 | 2.150 |
| cholesterol supplementation               | 1.220 | 0.280 | 3.97E-01 | 0.770 | 1.920 |
| diethyl ether treatment                   | 1.090 | 0.270 | 7.23E-01 | 0.670 | 1.790 |
| time of day (in hours since 9AM)          | 0.950 | 0.040 | 1.96E-01 | 0.890 | 1.030 |
| intercept                                 | 0.050 | 0.010 | 6.21E-26 | 0.030 | 0.080 |

  

| Vasculature not properly detected |                  |       |          |       |       |                  |       |          |       |       |                  |       |          |       |       |
|-----------------------------------|------------------|-------|----------|-------|-------|------------------|-------|----------|-------|-------|------------------|-------|----------|-------|-------|
|                                   | Model 1 (n=2050) |       |          |       |       | Model 2 (n=2050) |       |          |       |       | Model 3 (n=1859) |       |          |       |       |
|                                   | OR               | SE    | P        | lci   | uci   | OR               | SE    | P        | lci   | uci   | OR               | SE    | P        | lci   | uci   |
| overfeeding                       | 0.650            | 0.140 | 4.16E-02 | 0.420 | 0.980 | 0.860            | 0.190 | 4.89E-01 | 0.550 | 1.330 | 0.790            | 0.190 | 3.25E-01 | 0.500 | 1.260 |
| cholesterol supplementation       | 0.920            | 0.250 | 7.52E-01 | 0.540 | 1.560 | 0.840            | 0.230 | 5.13E-01 | 0.490 | 1.430 | 0.670            | 0.190 | 1.62E-01 | 0.380 | 1.170 |
| diethyl ether treatment           | 0.810            | 0.210 | 4.13E-01 | 0.490 | 1.340 | 0.820            | 0.210 | 4.36E-01 | 0.490 | 1.360 | 0.910            | 0.240 | 7.29E-01 | 0.540 | 1.540 |
| time of day (in hours since 9AM)  | 0.910            | 0.040 | 2.15E-02 | 0.840 | 0.990 | 0.920            | 0.040 | 6.32E-02 | 0.850 | 1.000 | 0.900            | 0.040 | 1.87E-02 | 0.820 | 0.980 |
| body length (in SD)               | -                | -     | -        | -     | -     | 0.770            | 0.090 | 2.26E-02 | 0.610 | 0.960 | 0.760            | 0.100 | 3.75E-02 | 0.580 | 0.980 |
| dorsal body surface area (in SD)  | -                | -     | -        | -     | -     | 0.650            | 0.080 | 2.45E-04 | 0.520 | 0.820 | 0.710            | 0.090 | 5.48E-03 | 0.560 | 0.900 |
| triglyceride levels (in SD)       | -                | -     | -        | -     | -     | -                | -     | -        | -     | -     | 0.730            | 0.090 | 1.59E-02 | 0.570 | 0.940 |
| glucose levels (in SD)            | -                | -     | -        | -     | -     | -                | -     | -        | -     | -     | 0.730            | 0.090 | 1.15E-02 | 0.570 | 0.930 |
| intercept                         | 0.120            | 0.030 | 4.79E-14 | 0.070 | 0.200 | 0.080            | 0.030 | 5.61E-16 | 0.050 | 0.150 | 0.090            | 0.030 | 4.75E-13 | 0.050 | 0.170 |

  

| Many false positive vascular lipid deposits |                  |       |          |       |       |                  |       |          |       |       |                  |       |          |       |       |
|---------------------------------------------|------------------|-------|----------|-------|-------|------------------|-------|----------|-------|-------|------------------|-------|----------|-------|-------|
|                                             | Model 1 (n=2043) |       |          |       |       | Model 2 (n=2043) |       |          |       |       | Model 3 (n=1848) |       |          |       |       |
|                                             | OR               | SE    | P        | lci   | uci   | OR               | SE    | P        | lci   | uci   | OR               | SE    | P        | lci   | uci   |
| overfeeding                                 | 0.540            | 0.120 | 6.81E-03 | 0.350 | 0.840 | 0.620            | 0.150 | 5.05E-02 | 0.390 | 1.000 | 0.450            | 0.120 | 3.65E-03 | 0.270 | 0.770 |
| cholesterol supplementation                 | 0.940            | 0.270 | 8.35E-01 | 0.530 | 1.660 | 0.920            | 0.270 | 7.89E-01 | 0.520 | 1.640 | 0.960            | 0.300 | 8.92E-01 | 0.520 | 1.770 |
| diethyl ether treatment                     | 0.650            | 0.170 | 1.06E-01 | 0.380 | 1.100 | 0.650            | 0.180 | 1.11E-01 | 0.380 | 1.100 | 0.670            | 0.190 | 1.66E-01 | 0.380 | 1.180 |
| time of day (in hours since 9AM)            | 1.040            | 0.040 | 3.49E-01 | 0.960 | 1.130 | 1.050            | 0.040 | 2.60E-01 | 0.970 | 1.140 | 1.060            | 0.050 | 1.98E-01 | 0.970 | 1.160 |
| body length (in SD)                         | -                | -     | -        | -     | -     | 0.930            | 0.110 | 5.57E-01 | 0.740 | 1.180 | 0.710            | 0.090 | 1.02E-02 | 0.550 | 0.920 |
| dorsal body surface area (in SD)            | -                | -     | -        | -     | -     | 0.820            | 0.100 | 9.58E-02 | 0.650 | 1.040 | 0.730            | 0.100 | 1.95E-02 | 0.550 | 0.950 |
| triglyceride levels (in SD)                 | -                | -     | -        | -     | -     | -                | -     | -        | -     | -     | 2.610            | 0.360 | 4.40E-12 | 1.990 | 3.430 |
| glucose levels (in SD)                      | -                | -     | -        | -     | -     | -                | -     | -        | -     | -     | 1.020            | 0.130 | 8.65E-01 | 0.790 | 1.320 |
| intercept                                   | 0.060            | 0.020 | 5.45E-19 | 0.030 | 0.120 | 0.060            | 0.020 | 4.50E-19 | 0.030 | 0.110 | 0.040            | 0.010 | 4.59E-19 | 0.020 | 0.080 |

continued Supplementary Table 6

|                                  | Many false positive oxLDL deposits |       |          |       |       |                 |       |          |       |       |                 |       |          |       |       |
|----------------------------------|------------------------------------|-------|----------|-------|-------|-----------------|-------|----------|-------|-------|-----------------|-------|----------|-------|-------|
|                                  | Model 1 (n=885)                    |       |          |       |       | Model 2 (n=885) |       |          |       |       | Model 3 (n=876) |       |          |       |       |
|                                  | OR                                 | SE    | P        | lci   | uci   | OR              | SE    | P        | lci   | uci   | OR              | SE    | P        | lci   | uci   |
| overfeeding                      | 1.050                              | 0.180 | 7.51E-01 | 0.760 | 1.460 | 1.250           | 0.220 | 2.00E-01 | 0.890 | 1.770 | 1.020           | 0.200 | 9.32E-01 | 0.700 | 1.480 |
| cholesterol supplementation      | 0.840                              | 0.170 | 3.89E-01 | 0.560 | 1.260 | 0.900           | 0.190 | 6.26E-01 | 0.590 | 1.370 | 0.910           | 0.210 | 6.77E-01 | 0.580 | 1.420 |
| diethyl ether treatment          | 0.680                              | 0.130 | 4.50E-02 | 0.460 | 0.990 | 0.670           | 0.130 | 4.07E-02 | 0.450 | 0.980 | 0.560           | 0.120 | 6.40E-03 | 0.370 | 0.850 |
| time of day (in hours since 9AM) | 0.870                              | 0.030 | 1.05E-04 | 0.810 | 0.930 | 0.900           | 0.030 | 3.55E-03 | 0.840 | 0.970 | 0.930           | 0.040 | 6.35E-02 | 0.860 | 1.000 |
| body length (in SD)              | -                                  | -     | -        | -     | -     | 1.260           | 0.130 | 2.47E-02 | 1.030 | 1.540 | 0.920           | 0.110 | 4.58E-01 | 0.730 | 1.150 |
| dorsal body surface area (in SD) | -                                  | -     | -        | -     | -     | 0.700           | 0.060 | 2.61E-05 | 0.590 | 0.830 | 0.720           | 0.070 | 4.19E-04 | 0.600 | 0.860 |
| triglyceride levels (in SD)      | -                                  | -     | -        | -     | -     | -               | -     | -        | -     | -     | 1.950           | 0.260 | 3.96E-07 | 1.500 | 2.520 |
| glucose levels (in SD)           | -                                  | -     | -        | -     | -     | -               | -     | -        | -     | -     | 0.400           | 0.050 | 1.59E-14 | 0.320 | 0.500 |
| intercept                        | 0.790                              | 0.200 | 3.46E-01 | 0.480 | 1.290 | 0.530           | 0.140 | 1.93E-02 | 0.310 | 0.900 | 0.400           | 0.110 | 1.32E-03 | 0.220 | 0.700 |

  

|                                  | Many false negative macrophages |       |          |       |       |                  |       |          |       |       |                 |       |          |       |        |
|----------------------------------|---------------------------------|-------|----------|-------|-------|------------------|-------|----------|-------|-------|-----------------|-------|----------|-------|--------|
|                                  | Model 1 (n=1010)                |       |          |       |       | Model 2 (n=1010) |       |          |       |       | Model 2 (n=589) |       |          |       |        |
|                                  | OR                              | SE    | P        | lci   | uci   | OR               | SE    | P        | lci   | uci   | OR              | SE    | P        | lci   | uci    |
| overfeeding                      | 0.380                           | 0.210 | 8.27E-02 | 0.130 | 1.130 | 0.470            | 0.280 | 2.04E-01 | 0.140 | 1.510 | 1.520           | 1.770 | 7.22E-01 | 0.150 | 14.920 |
| cholesterol supplementation      | 0.390                           | 0.330 | 2.68E-01 | 0.080 | 2.050 | 0.310            | 0.270 | 1.76E-01 | 0.060 | 1.680 | 0.480           | 0.590 | 5.53E-01 | 0.040 | 5.440  |
| diethyl ether treatment          | 0.630                           | 0.360 | 4.13E-01 | 0.200 | 1.920 | 0.550            | 0.330 | 3.15E-01 | 0.170 | 1.760 | -               | -     | -        | -     | -      |
| time of day (in hours since 9AM) | 0.830                           | 0.090 | 7.57E-02 | 0.680 | 1.020 | 0.870            | 0.090 | 1.84E-01 | 0.710 | 1.070 | 0.650           | 0.190 | 1.45E-01 | 0.360 | 1.160  |
| body length (in SD)              | -                               | -     | -        | -     | -     | 0.510            | 0.150 | 2.19E-02 | 0.280 | 0.910 | 1.450           | 0.890 | 5.41E-01 | 0.440 | 4.800  |
| dorsal body surface area (in SD) | -                               | -     | -        | -     | -     | 1.580            | 0.480 | 1.35E-01 | 0.870 | 2.860 | 1.150           | 0.700 | 8.22E-01 | 0.350 | 3.790  |
| triglyceride levels (in SD)      | -                               | -     | -        | -     | -     | -                | -     | -        | -     | -     | 0.260           | 0.180 | 4.62E-02 | 0.070 | 0.980  |
| glucose levels (in SD)           | -                               | -     | -        | -     | -     | -                | -     | -        | -     | -     | 2.080           | 1.360 | 2.63E-01 | 0.580 | 7.500  |
| intercept                        | 0.090                           | 0.050 | 1.76E-05 | 0.030 | 0.270 | 0.070            | 0.040 | 3.40E-06 | 0.020 | 0.220 | 0.060           | 0.090 | 8.53E-02 | 0.000 | 1.490  |

  

|                                  | Many false negative neutrophils |       |          |       |       |                 |       |          |       |       |                 |       |          |       |        |
|----------------------------------|---------------------------------|-------|----------|-------|-------|-----------------|-------|----------|-------|-------|-----------------|-------|----------|-------|--------|
|                                  | Model 1 (n=537)                 |       |          |       |       | Model 2 (n=537) |       |          |       |       | Model 3 (n=416) |       |          |       |        |
|                                  | OR                              | SE    | P        | lci   | uci   | OR              | SE    | P        | lci   | uci   | OR              | SE    | P        | lci   | uci    |
| overfeeding                      | 1.110                           | 0.360 | 7.38E-01 | 0.590 | 2.110 | 1.380           | 0.500 | 3.69E-01 | 0.680 | 2.810 | 4.270           | 2.750 | 2.41E-02 | 1.210 | 15.110 |
| cholesterol supplementation      | 0.730                           | 0.310 | 4.66E-01 | 0.320 | 1.680 | 0.650           | 0.280 | 3.12E-01 | 0.280 | 1.510 | 0.880           | 0.600 | 8.53E-01 | 0.230 | 3.350  |
| diethyl ether treatment          | 0.950                           | 0.370 | 8.89E-01 | 0.440 | 2.060 | 0.830           | 0.340 | 6.46E-01 | 0.370 | 1.850 | 6.440           | 7.440 | 1.07E-01 | 0.670 | 62.010 |
| time of day (in hours since 9AM) | 0.790                           | 0.050 | 4.24E-04 | 0.690 | 0.900 | 0.810           | 0.060 | 1.76E-03 | 0.700 | 0.920 | 0.710           | 0.130 | 5.77E-02 | 0.500 | 1.010  |
| body length (in SD)              | -                               | -     | -        | -     | -     | 0.630           | 0.120 | 1.11E-02 | 0.440 | 0.900 | 0.820           | 0.260 | 5.40E-01 | 0.440 | 1.540  |
| dorsal body surface area (in SD) | -                               | -     | -        | -     | -     | 1.190           | 0.260 | 4.16E-01 | 0.780 | 1.820 | 0.570           | 0.220 | 1.41E-01 | 0.270 | 1.200  |
| triglyceride levels (in SD)      | -                               | -     | -        | -     | -     | -               | -     | -        | -     | -     | 0.270           | 0.090 | 6.30E-05 | 0.140 | 0.510  |
| glucose levels (in SD)           | -                               | -     | -        | -     | -     | -               | -     | -        | -     | -     | 1.140           | 0.450 | 7.44E-01 | 0.520 | 2.470  |
| intercept                        | 0.300                           | 0.110 | 9.49E-04 | 0.150 | 0.610 | 0.240           | 0.090 | 2.03E-04 | 0.110 | 0.510 | 0.030           | 0.020 | 1.08E-04 | 0.000 | 0.160  |



continued Supplementary Table 6

|                                         | Circulating neutrophils present in the z-stack |       |          |       |       |                 |       |          |       |       |                 |       |          |       |        |
|-----------------------------------------|------------------------------------------------|-------|----------|-------|-------|-----------------|-------|----------|-------|-------|-----------------|-------|----------|-------|--------|
|                                         | Model 1 (n=504)                                |       |          |       |       | Model 2 (n=504) |       |          |       |       | Model 3 (n=404) |       |          |       |        |
|                                         | OR                                             | SE    | P        | lci   | uci   | OR              | SE    | P        | lci   | uci   | OR              | SE    | P        | lci   | uci    |
| <b>overfeeding</b>                      | 1.740                                          | 1.140 | 3.99E-01 | 0.480 | 6.290 | 1.660           | 1.260 | 5.04E-01 | 0.380 | 7.340 | 2.630           | 2.150 | 2.35E-01 | 0.530 | 13.010 |
| <b>cholesterol supplementation</b>      | 0.980                                          | 0.980 | 9.80E-01 | 0.140 | 7.020 | 1.180           | 1.210 | 8.69E-01 | 0.160 | 8.740 | 1.580           | 1.700 | 6.70E-01 | 0.190 | 12.940 |
| <b>diethyl ether treatment</b>          | 0.300                                          | 0.250 | 1.46E-01 | 0.060 | 1.520 | 0.330           | 0.280 | 1.97E-01 | 0.060 | 1.790 | 0.380           | 0.350 | 2.90E-01 | 0.060 | 2.270  |
| <b>time of day (in hours since 9AM)</b> | 0.970                                          | 0.110 | 7.58E-01 | 0.780 | 1.200 | 0.960           | 0.110 | 7.48E-01 | 0.770 | 1.210 | 0.990           | 0.130 | 9.26E-01 | 0.760 | 1.280  |
| <b>body length (in SD)</b>              | -                                              | -     | -        | -     | -     | 1.580           | 0.600 | 2.25E-01 | 0.750 | 3.320 | 1.410           | 0.610 | 4.26E-01 | 0.610 | 3.270  |
| <b>dorsal body surface area (in SD)</b> | -                                              | -     | -        | -     | -     | 0.650           | 0.290 | 3.37E-01 | 0.260 | 1.580 | 0.570           | 0.280 | 2.60E-01 | 0.220 | 1.510  |
| <b>triglyceride levels (in SD)</b>      | -                                              | -     | -        | -     | -     | -               | -     | -        | -     | -     | 1.530           | 0.750 | 3.85E-01 | 0.590 | 4.010  |
| <b>glucose levels (in SD)</b>           | -                                              | -     | -        | -     | -     | -               | -     | -        | -     | -     | 1.180           | 0.550 | 7.21E-01 | 0.470 | 2.960  |
| <b>intercept</b>                        | 0.040                                          | 0.030 | 2.24E-05 | 0.010 | 0.170 | 0.030           | 0.030 | 3.19E-05 | 0.010 | 0.160 | 0.010           | 0.010 | 7.23E-05 | 0.000 | 0.110  |

Associations are shown for criteria that resulted in the exclusion of at least 10 larvae. Vasculature not properly detected typically results from weak staining, possibly due to low levels of circulating lipids; Many false positives: >20% of true negative objects were falsely detected by the qualification pipeline; Many false negatives: <20% of true positive objects were detected by the qualification pipeline. Associations were examined using logistic regression models. Model 1: adjusted for use of diethyl ether (to prepare the diet) and time of day; Model 2: additionally adjusted for body length and dorsal body surface area; Model 3: additionally adjusted for whole-body triglyceride and glucose levels. Dorsal body surface area was normalized for body length; whole-body triglyceride and glucose levels were normalized for protein level. Adjusting for transgenic background and batch would have excluded approximately half the larvae. Effects shown for overfeeding, cholesterol supplementation and diethyl ether treatment are compared with unexposed controls. Lci and uci are lower and upper boundaries of the 95% confidence interval.

**Supplementary Table 7 - The effect of treatment with atorvastatin and ezetimibe on body size**

|                |                                           | Body length (n=1004) |       |          |        |       |
|----------------|-------------------------------------------|----------------------|-------|----------|--------|-------|
|                |                                           | Effect               | SE    | P        | lci    | uci   |
| fixed factors  | atorvastatin and ezetimibe                | -0.025               | 0.053 | 6.29E-01 | -0.128 | 0.078 |
|                | time of day (in hours since 9AM)          | 0.000                | 0.012 | 9.78E-01 | -0.023 | 0.024 |
|                | intercept                                 | 0.012                | 0.162 | 9.41E-01 | -0.305 | 0.330 |
| random factors | <i>variation by transgenic background</i> | 0.000                | -     | -        | -      | -     |
|                | <i>variation by batch</i>                 | 0.495                | 0.147 | -        | 0.276  | 0.886 |
|                | <i>residual</i>                           | 0.794                | 0.025 | -        | 0.747  | 0.845 |

|                |                                           | Dorsal body surface area (n=1004) |       |          |        |        |
|----------------|-------------------------------------------|-----------------------------------|-------|----------|--------|--------|
|                |                                           | Effect                            | SE    | P        | lci    | uci    |
| fixed factors  | atorvastatin and ezetimibe                | -0.135                            | 0.055 | 1.48E-02 | -0.244 | -0.026 |
|                | time of day (in hours since 9AM)          | 0.046                             | 0.013 | 2.72E-04 | 0.021  | 0.071  |
|                | intercept                                 | -0.185                            | 0.335 | 5.81E-01 | -0.842 | 0.472  |
| random factors | <i>variation by transgenic background</i> | 0.561                             | 0.239 | -        | 0.244  | 1.291  |
|                | <i>variation by batch</i>                 | 0.176                             | 0.057 | -        | 0.093  | 0.330  |
|                | <i>residual</i>                           | 0.842                             | 0.019 | -        | 0.806  | 0.880  |

|                |                                           | Lateral body surface area (n=553) |       |          |        |        |
|----------------|-------------------------------------------|-----------------------------------|-------|----------|--------|--------|
|                |                                           | Effect                            | SE    | P        | lci    | uci    |
| fixed factors  | atorvastatin and ezetimibe                | -0.233                            | 0.088 | 8.05E-03 | -0.406 | -0.061 |
|                | time of day (in hours since 9AM)          | 0.022                             | 0.019 | 2.61E-01 | -0.016 | 0.059  |
|                | intercept                                 | -0.011                            | 0.187 | 9.54E-01 | -0.376 | 0.355  |
| random factors | <i>variation by transgenic background</i> | 0.221                             | 0.122 | -        | 0.075  | 0.654  |
|                | <i>variation by batch</i>                 | 0.066                             | 0.079 | -        | 0.006  | 0.678  |
|                | <i>residual</i>                           | 0.972                             | 0.029 | -        | 0.916  | 1.031  |

|                |                                           | Body volume (n=512) |       |          |        |        |
|----------------|-------------------------------------------|---------------------|-------|----------|--------|--------|
|                |                                           | Effect              | SE    | P        | lci    | uci    |
| fixed factors  | atorvastatin and ezetimibe                | -0.314              | 0.087 | 2.95E-04 | -0.484 | -0.144 |
|                | time of day (in hours since 9AM)          | 0.024               | 0.019 | 2.19E-01 | -0.014 | 0.061  |
|                | intercept                                 | -0.026              | 0.350 | 9.40E-01 | -0.712 | 0.660  |
| random factors | <i>variation by transgenic background</i> | 0.458               | 0.249 | -        | 0.158  | 1.332  |
|                | <i>variation by batch</i>                 | 0.209               | 0.101 | -        | 0.082  | 0.538  |
|                | <i>residual</i>                           | 0.922               | 0.029 | -        | 0.867  | 0.981  |

Dorsal and lateral body surface area and body volume were normalized for body length using residuals. All outcomes were inverse-normally transformed before the analysis. Associations were examined using hierarchical linear models. Effects shown for atorvastatin and ezetimibe treatment are compared with unexposed controls. Lci and uci are lower and upper boundaries of the 95% confidence interval.

**Supplementary Table 8 - The effect of treatment with atorvastatin and ezetimibe on whole-body lipid and glucose levels**

|                |                                           | LDL cholesterol levels (n=567) |              |          |              |              |
|----------------|-------------------------------------------|--------------------------------|--------------|----------|--------------|--------------|
|                |                                           | Effect                         | SE           | P        | lci          | uci          |
| fixed factors  | atorvastatin and ezetimibe                | -0.544                         | 0.079        | 5.22E-12 | -0.699       | -0.390       |
|                | time of day (in hours since 9AM)          | 0.017                          | 0.017        | 3.28E-01 | -0.017       | 0.050        |
|                | intercept                                 | 0.173                          | 0.343        | 6.13E-01 | -0.499       | 0.846        |
| random factors | <i>variation by transgenic background</i> | <i>0.461</i>                   | <i>0.242</i> | -        | <i>0.165</i> | <i>1.288</i> |
|                | <i>variation by batch</i>                 | <i>0.147</i>                   | <i>0.071</i> | -        | <i>0.057</i> | <i>0.378</i> |
|                | <i>residual</i>                           | <i>0.861</i>                   | <i>0.026</i> | -        | <i>0.812</i> | <i>0.913</i> |

  

|                |                                           | HDL cholesterol levels (n=564) |              |          |              |              |
|----------------|-------------------------------------------|--------------------------------|--------------|----------|--------------|--------------|
|                |                                           | Effect                         | SE           | P        | lci          | uci          |
| fixed factors  | atorvastatin and ezetimibe                | 0.043                          | 0.078        | 5.78E-01 | -0.109       | 0.195        |
|                | time of day (in hours since 9AM)          | 0.018                          | 0.017        | 2.91E-01 | -0.015       | 0.050        |
|                | intercept                                 | -0.064                         | 0.387        | 8.68E-01 | -0.822       | 0.694        |
| random factors | <i>variation by transgenic background</i> | <i>0.516</i>                   | <i>0.278</i> | -        | <i>0.180</i> | <i>1.483</i> |
|                | <i>variation by batch</i>                 | <i>0.228</i>                   | <i>0.094</i> | -        | <i>0.101</i> | <i>0.512</i> |
|                | <i>residual</i>                           | <i>0.837</i>                   | <i>0.025</i> | -        | <i>0.789</i> | <i>0.888</i> |

  

|                |                                           | Triglyceride levels (n=1005) |              |          |              |              |
|----------------|-------------------------------------------|------------------------------|--------------|----------|--------------|--------------|
|                |                                           | Effect                       | SE           | P        | lci          | uci          |
| fixed factors  | atorvastatin and ezetimibe                | -0.245                       | 0.055        | 8.68E-06 | -0.353       | -0.137       |
|                | time of day (in hours since 9AM)          | 0.046                        | 0.013        | 2.29E-04 | 0.022        | 0.071        |
|                | intercept                                 | -0.133                       | 0.198        | 5.04E-01 | -0.522       | 0.256        |
| random factors | <i>variation by transgenic background</i> | <i>0.174</i>                 | <i>0.351</i> | -        | <i>0.003</i> | <i>9.122</i> |
|                | <i>variation by batch</i>                 | <i>0.521</i>                 | <i>0.145</i> | -        | <i>0.302</i> | <i>0.899</i> |
|                | <i>residual</i>                           | <i>0.832</i>                 | <i>0.019</i> | -        | <i>0.796</i> | <i>0.869</i> |

  

|                |                                           | Total cholesterol levels (n=1005) |              |          |              |              |
|----------------|-------------------------------------------|-----------------------------------|--------------|----------|--------------|--------------|
|                |                                           | Effect                            | SE           | P        | lci          | uci          |
| fixed factors  | atorvastatin and ezetimibe                | -0.821                            | 0.051        | 1.23E-58 | -0.920       | -0.721       |
|                | time of day (in hours since 9AM)          | 0.060                             | 0.012        | 2.39E-07 | 0.037        | 0.083        |
|                | intercept                                 | 0.089                             | 0.283        | 7.54E-01 | -0.467       | 0.644        |
| random factors | <i>variation by transgenic background</i> | <i>0.443</i>                      | <i>0.221</i> | -        | <i>0.166</i> | <i>1.178</i> |
|                | <i>variation by batch</i>                 | <i>0.344</i>                      | <i>0.092</i> | -        | <i>0.203</i> | <i>0.581</i> |
|                | <i>residual</i>                           | <i>0.768</i>                      | <i>0.017</i> | -        | <i>0.735</i> | <i>0.803</i> |

  

|                |                                           | Glucose levels (n=1008) |              |          |              |              |
|----------------|-------------------------------------------|-------------------------|--------------|----------|--------------|--------------|
|                |                                           | Effect                  | SE           | P        | lci          | uci          |
| fixed factors  | atorvastatin and ezetimibe                | 0.199                   | 0.053        | 1.92E-04 | 0.094        | 0.303        |
|                | time of day (in hours since 9AM)          | -0.018                  | 0.012        | 1.34E-01 | -0.042       | 0.006        |
|                | intercept                                 | -0.088                  | 0.313        | 7.78E-01 | -0.702       | 0.525        |
| random factors | <i>variation by transgenic background</i> | <i>0.520</i>            | <i>0.223</i> | -        | <i>0.224</i> | <i>1.206</i> |
|                | <i>variation by batch</i>                 | <i>0.204</i>            | <i>0.059</i> | -        | <i>0.115</i> | <i>0.360</i> |
|                | <i>residual</i>                           | <i>0.810</i>            | <i>0.018</i> | -        | <i>0.775</i> | <i>0.847</i> |

All outcomes were normalized for protein level using residuals, and inverse-normally transformed before the analysis.

Associations were examined using hierarchical linear models and were adjusted for time of day, transgenic background and batch. Effects shown for treatment with atorvastatin and ezetimibe are compared with untreated controls. Lci and uci are lower and upper boundaries of the 95% confidence interval.

Supplementary Table 9 - The effect of atorvastatin and ezetimibe on image-based vascular atherogenic traits

|                         |                                                                                      | Vascular lipid deposition |          |          |        |        |                 |          |          |        |        |                 |          |          |        |        |                 |          |          |        |        |
|-------------------------|--------------------------------------------------------------------------------------|---------------------------|----------|----------|--------|--------|-----------------|----------|----------|--------|--------|-----------------|----------|----------|--------|--------|-----------------|----------|----------|--------|--------|
|                         |                                                                                      | Model 1 (n=776)           |          |          |        |        | Model 2 (n=776) |          |          |        |        | Model 3 (n=728) |          |          |        |        | Model 4 (n=344) |          |          |        |        |
|                         |                                                                                      | Effect                    | SE       | P        | lci    | uci    | Effect          | SE       | P        | lci    | uci    | Effect          | SE       | P        | lci    | uci    | Effect          | SE       | P        | lci    | uci    |
| negative binomial terms | atorvastatin and ezetimibe                                                           | -1.523                    | 0.176    | 4.75E-18 | -1.868 | -1.178 | -1.496          | 0.177    | 2.32E-17 | -1.842 | -1.150 | -1.423          | 0.180    | 3.04E-15 | -1.776 | -1.069 | -2.001          | 0.299    | 2.18E-11 | -2.587 | -1.415 |
|                         | time of day (in hours since 9AM)                                                     | 0.155                     | 0.038    | 4.83E-05 | 0.080  | 0.229  | 0.145           | 0.037    | 1.07E-04 | 0.072  | 0.219  | 0.151           | 0.040    | 1.53E-04 | 0.073  | 0.229  | 0.327           | 0.054    | 1.88E-09 | 0.221  | 0.434  |
|                         | body length (in SD)                                                                  | -                         | -        | -        | -      | -      | -0.222          | 0.119    | 6.27E-02 | -0.456 | 0.012  | -0.221          | 0.120    | 6.43E-02 | -0.455 | 0.013  | 0.352           | 0.243    | 1.48E-01 | -0.125 | 0.829  |
|                         | dorsal body surface area (in SD)                                                     | -                         | -        | -        | -      | -      | 0.183           | 0.102    | 7.15E-02 | -0.016 | 0.383  | 0.118           | 0.120    | 3.28E-01 | -0.118 | 0.354  | 0.179           | 0.193    | 3.51E-01 | -0.198 | 0.557  |
|                         | LDL cholesterol levels (in SD)                                                       | -                         | -        | -        | -      | -      | -               | -        | -        | -      | -      | -               | -        | -        | -      | -      | -0.231          | 0.149    | 1.21E-01 | -0.524 | 0.061  |
|                         | HDL cholesterol levels (in SD)                                                       | -                         | -        | -        | -      | -      | -               | -        | -        | -      | -      | -               | -        | -        | -      | -      | -0.216          | 0.133    | 1.06E-01 | -0.477 | 0.046  |
|                         | triglyceride levels (in SD)                                                          | -                         | -        | -        | -      | -      | -               | -        | -        | -      | -      | 0.178           | 0.119    | 1.36E-01 | -0.056 | 0.412  | 0.426           | 0.216    | 4.87E-02 | 0.002  | 0.849  |
|                         | glucose levels (in SD)                                                               | -                         | -        | -        | -      | -      | -               | -        | -        | -      | -      | -0.125          | 0.103    | 2.27E-01 | -0.327 | 0.078  | -0.159          | 0.231    | 4.91E-01 | -0.611 | 0.293  |
|                         | Tg(flk:EGFP) carriers vs. Tg(mpo:EGFP; mpeg1:mCherry) carriers                       | -0.915                    | 0.335    | 6.37E-03 | -1.572 | -0.257 | -0.823          | 0.360    | 2.22E-02 | -1.527 | -0.118 | -0.808          | 0.383    | 3.50E-02 | -1.560 | -0.057 | -               | -        | -        | -      | -      |
|                         | Tg(hsp70:IK17:EGFP; mpeg1:mCherry) carriers vs. Tg(mpo:EGFP; mpeg1:mCherry) carriers | -0.477                    | 0.245    | 5.17E-02 | -0.958 | 0.003  | 0.103           | 0.353    | 7.72E-01 | -0.590 | 0.795  | -0.020          | 0.403    | 9.60E-01 | -0.810 | 0.770  | 0.562           | 0.606    | 3.54E-01 | -0.626 | 1.751  |
|                         | batch 1                                                                              | -0.727                    | 0.456    | 1.11E-01 | -1.621 | 0.167  | -0.600          | 0.453    | 1.85E-01 | -1.488 | 0.288  | -0.263          | 0.497    | 5.97E-01 | -1.237 | 0.711  | -               | -        | -        | -      | -      |
|                         | batch 2                                                                              | -0.480                    | 0.330    | 1.47E-01 | -1.127 | 0.168  | -0.240          | 0.349    | 4.92E-01 | -0.924 | 0.444  | 0.182           | 0.376    | 6.28E-01 | -0.555 | 0.920  | -               | -        | -        | -      | -      |
|                         | batch 3                                                                              | -1.264                    | 0.319    | 7.40E-05 | -1.889 | -0.639 | -1.204          | 0.311    | 1.08E-04 | -1.814 | -0.595 | -0.895          | 0.361    | 1.32E-02 | -1.603 | -0.187 | -               | -        | -        | -      | -      |
|                         | batch 4                                                                              | -0.678                    | 0.325    | 3.70E-02 | -1.316 | -0.041 | -0.611          | 0.331    | 6.52E-02 | -1.260 | 0.039  | -0.322          | 0.381    | 3.97E-01 | -1.069 | 0.424  | -               | -        | -        | -      | -      |
|                         | batch 5                                                                              | -0.385                    | 0.377    | 3.07E-01 | -1.125 | 0.355  | -0.504          | 0.388    | 1.94E-01 | -1.265 | 0.257  | -0.427          | 0.384    | 2.66E-01 | -1.179 | 0.325  | -               | -        | -        | -      | -      |
| batch 6                 | -0.252                                                                               | 0.384                     | 5.11E-01 | -1.005   | 0.500  | -0.509 | 0.392           | 1.93E-01 | -1.277   | 0.258  | -0.492 | 0.397           | 2.16E-01 | -1.271   | 0.287  | 0.269  | 0.458           | 5.57E-01 | -0.629   | 1.167  |        |
| batch 7                 | -                                                                                    | -                         | -        | -        | -      | -      | -               | -        | -        | -      | -      | -               | -        | -        | -      | 0.124  | 0.454           | 7.85E-01 | -0.766   | 1.014  |        |
| batch 8                 | -2.432                                                                               | 0.386                     | 3.12E-10 | -3.189   | -1.674 | -2.576 | 0.374           | 5.73E-12 | -3.309   | -1.843 | -2.513 | 0.374           | 1.85E-11 | -3.246   | -1.780 | -2.101 | 0.479           | 1.14E-05 | -3.040   | -1.163 |        |
| intercept               | 3.849                                                                                | 0.268                     | 1.31E-46 | 3.322    | 4.375  | 3.740  | 0.274           | 2.47E-42 | 3.202    | 4.277  | 3.570  | 0.298           | 4.95E-33 | 2.986    | 4.155  | 1.707  | 0.455           | 1.75E-04 | 0.815    | 2.598  |        |

  

|               |                                  | Vascular accumulation of oxLDL |       |          |        |       |                 |       |          |        |       |                 |       |          |        |       |                 |       |          |        |       |
|---------------|----------------------------------|--------------------------------|-------|----------|--------|-------|-----------------|-------|----------|--------|-------|-----------------|-------|----------|--------|-------|-----------------|-------|----------|--------|-------|
|               |                                  | Model 1 (n=236)                |       |          |        |       | Model 2 (n=236) |       |          |        |       | Model 3 (n=233) |       |          |        |       | Model 4 (n=229) |       |          |        |       |
|               |                                  | Effect                         | SE    | P        | lci    | uci   | Effect          | SE    | P        | lci    | uci   | Effect          | SE    | P        | lci    | uci   | Effect          | SE    | P        | lci    | uci   |
| fixed factors | atorvastatin and ezetimibe       | 0.019                          | 0.126 | 8.78E-01 | -0.228 | 0.267 | 0.100           | 0.126 | 4.29E-01 | -0.147 | 0.347 | 0.099           | 0.127 | 4.35E-01 | -0.150 | 0.349 | 0.130           | 0.130 | 3.19E-01 | -0.126 | 0.385 |
|               | time of day (in hours since 9AM) | -0.017                         | 0.024 | 4.94E-01 | -0.064 | 0.031 | -0.018          | 0.024 | 4.45E-01 | -0.064 | 0.028 | -0.028          | 0.024 | 2.44E-01 | -0.075 | 0.019 | -0.031          | 0.024 | 1.96E-01 | -0.079 | 0.016 |
|               | body length (in SD)              | -                              | -     | -        | -      | -     | 0.111           | 0.085 | 1.90E-01 | -0.055 | 0.278 | 0.143           | 0.094 | 1.30E-01 | -0.042 | 0.328 | 0.157           | 0.096 | 1.01E-01 | -0.031 | 0.344 |
|               | dorsal body surface area (in SD) | -                              | -     | -        | -      | -     | 0.189           | 0.063 | 2.46E-03 | 0.067  | 0.312 | 0.206           | 0.081 | 1.14E-02 | 0.046  | 0.365 | 0.220           | 0.081 | 6.84E-03 | 0.060  | 0.379 |
|               | LDL cholesterol levels (in SD)   | -                              | -     | -        | -      | -     | -               | -     | -        | -      | -     | -               | -     | -        | -      | -     | 0.007           | 0.066 | 9.16E-01 | -0.122 | 0.135 |
|               | HDL cholesterol levels (in SD)   | -                              | -     | -        | -      | -     | -               | -     | -        | -      | -     | -               | -     | -        | -      | -     | 0.127           | 0.067 | 5.80E-02 | -0.004 | 0.258 |
|               | triglyceride levels (in SD)      | -                              | -     | -        | -      | -     | -               | -     | -        | -      | -     | -0.010          | 0.087 | 9.06E-01 | -0.181 | 0.160 | 0.014           | 0.092 | 8.76E-01 | -0.166 | 0.195 |
|               | glucose levels (in SD)           | -                              | -     | -        | -      | -     | -               | -     | -        | -      | -     | 0.152           | 0.096 | 1.13E-01 | -0.036 | 0.341 | 0.096           | 0.108 | 3.76E-01 | -0.116 | 0.308 |
|               | intercept                        | 0.169                          | 0.256 | 5.09E-01 | -0.333 | 0.672 | 0.261           | 0.256 | 3.10E-01 | -0.242 | 0.763 | 0.433           | 0.280 | 1.22E-01 | -0.116 | 0.981 | 0.323           | 0.299 | 2.81E-01 | -0.264 | 0.909 |
|               | random factors                   | variation by batch             | 0.378 | 0.169    | -      | 0.157 | 0.907           | 0.373 | 0.173    | -      | 0.151 | 0.924           | 0.382 | 0.177    | -      | 0.154 | 0.948           | 0.400 | 0.185    | -      | 0.162 |
| residual      |                                  | 0.839                          | 0.039 | -        | 0.767  | 0.919 | 0.820           | 0.038 | -        | 0.749  | 0.898 | 0.818           | 0.038 | -        | 0.746  | 0.896 | 0.811           | 0.038 | -        | 0.739  | 0.889 |

  

|                |                                    | Vascular infiltration by macrophages |       |          |        |       |                 |       |          |        |       |                 |       |          |        |       |                 |       |          |        |        |
|----------------|------------------------------------|--------------------------------------|-------|----------|--------|-------|-----------------|-------|----------|--------|-------|-----------------|-------|----------|--------|-------|-----------------|-------|----------|--------|--------|
|                |                                    | Model 1 (n=633)                      |       |          |        |       | Model 2 (n=633) |       |          |        |       | Model 3 (n=585) |       |          |        |       | Model 4 (n=224) |       |          |        |        |
|                |                                    | Effect                               | SE    | P        | lci    | uci   | Effect          | SE    | P        | lci    | uci   | Effect          | SE    | P        | lci    | uci   | Effect          | SE    | P        | lci    | uci    |
| fixed factors  | atorvastatin and ezetimibe         | -0.001                               | 0.049 | 9.80E-01 | -0.097 | 0.094 | 0.005           | 0.049 | 9.17E-01 | -0.090 | 0.101 | 0.010           | 0.051 | 8.50E-01 | -0.090 | 0.109 | -0.003          | 0.072 | 9.64E-01 | -0.144 | 0.138  |
|                | time of day (in hours since 9AM)   | 0.036                                | 0.011 | 9.87E-04 | 0.015  | 0.058 | 0.033           | 0.011 | 3.11E-03 | 0.011  | 0.054 | 0.029           | 0.011 | 1.00E-02 | 0.007  | 0.052 | 0.009           | 0.013 | 4.96E-01 | -0.017 | 0.035  |
|                | body length (in SD)                | -                                    | -     | -        | -      | -     | 0.001           | 0.031 | 9.81E-01 | -0.060 | 0.061 | 0.011           | 0.032 | 7.36E-01 | -0.051 | 0.073 | 0.065           | 0.053 | 2.20E-01 | -0.039 | 0.169  |
|                | dorsal body surface area (in SD)   | -                                    | -     | -        | -      | -     | 0.059           | 0.029 | 4.03E-02 | 0.003  | 0.116 | 0.043           | 0.032 | 1.82E-01 | -0.020 | 0.105 | 0.022           | 0.044 | 6.14E-01 | -0.065 | 0.109  |
|                | LDL cholesterol levels (in SD)     | -                                    | -     | -        | -      | -     | -               | -     | -        | -      | -     | -               | -     | -        | -      | -     | -0.040          | 0.036 | 2.71E-01 | -0.110 | 0.031  |
|                | HDL cholesterol levels (in SD)     | -                                    | -     | -        | -      | -     | -               | -     | -        | -      | -     | -               | -     | -        | -      | -     | 0.031           | 0.037 | 4.08E-01 | -0.042 | 0.104  |
|                | triglyceride levels (in SD)        | -                                    | -     | -        | -      | -     | -               | -     | -        | -      | -     | 0.027           | 0.030 | 3.68E-01 | -0.032 | 0.087 | 0.091           | 0.051 | 7.67E-02 | -0.010 | 0.191  |
|                | glucose levels (in SD)             | -                                    | -     | -        | -      | -     | -               | -     | -        | -      | -     | 0.011           | 0.025 | 6.76E-01 | -0.039 | 0.060 | -0.007          | 0.059 | 9.10E-01 | -0.122 | 0.109  |
| random factors | intercept                          | -0.285                               | 0.505 | 5.73E-01 | -1.275 | 0.706 | -0.252          | 0.486 | 6.04E-01 | -1.204 | 0.701 | -0.238          | 0.483 | 6.22E-01 | -1.186 | 0.709 | -0.877          | 0.196 | 7.53E-06 | -1.261 | -0.493 |
|                | variation by transgenic background | 0.699                                | 0.361 | -        | 0.253  | 1.925 | 0.670           | 0.348 | -        | 0.242  | 1.857 | 0.666           | 0.347 | -        | 0.240  | 1.849 | 0.000           | 0.000 | -        | 0.000  | -      |
|                | variation by batch                 | 0.241                                | 0.075 | -        | 0.131  | 0.442 | 0.247           | 0.077 | -        | 0.134  | 0.457 | 0.246           | 0.077 | -        | 0.133  | 0.456 | 0.289           | 0.126 | -        | 0.123  | 0.680  |
|                | residuals                          | 0.583                                | 0.017 | -        | 0.552  | 0.617 | 0.581           | 0.016 | -        | 0.550  | 0.614 | 0.567           | 0.017 | -        | 0.536  | 0.601 | 0.438           | 0.021 | -        | 0.399  | 0.481  |

continued Supplementary Table 9

|                         |                                                                                      | Vascular co-localization of lipids with macrophages |          |          |        |        |                 |          |          |        |        |                 |          |          |        |        |                 |          |          |        |        |
|-------------------------|--------------------------------------------------------------------------------------|-----------------------------------------------------|----------|----------|--------|--------|-----------------|----------|----------|--------|--------|-----------------|----------|----------|--------|--------|-----------------|----------|----------|--------|--------|
|                         |                                                                                      | Model 1 (n=549)                                     |          |          |        |        | Model 2 (n=549) |          |          |        |        | Model 3 (n=502) |          |          |        |        | Model 4 (n=157) |          |          |        |        |
|                         |                                                                                      | Effect                                              | SE       | P        | lci    | uci    | Effect          | SE       | P        | lci    | uci    | Effect          | SE       | P        | lci    | uci    | Effect          | SE       | P        | lci    | uci    |
| negative binomial terms | atorvastatin and ezetimibe                                                           | -1.341                                              | 0.241    | 2.46E-08 | -1.813 | -0.870 | -1.383          | 0.237    | 5.74E-09 | -1.848 | -0.917 | -1.226          | 0.252    | 1.14E-06 | -1.720 | -0.732 | -2.992          | 0.730    | 4.10E-05 | -4.422 | -1.562 |
|                         | time of day (in hours since 9AM)                                                     | 0.122                                               | 0.052    | 1.85E-02 | 0.021  | 0.224  | 0.116           | 0.054    | 3.25E-02 | 0.010  | 0.222  | 0.120           | 0.059    | 4.30E-02 | 0.004  | 0.237  | 0.388           | 0.125    | 1.98E-03 | 0.142  | 0.633  |
|                         | body length (in SD)                                                                  | -                                                   | -        | -        | -      | -      | -0.471          | 0.161    | 3.50E-03 | -0.787 | -0.155 | -0.477          | 0.170    | 4.99E-03 | -0.810 | -0.144 | 1.020           | 0.539    | 5.83E-02 | -0.036 | 2.076  |
|                         | dorsal body surface area (in SD)                                                     | -                                                   | -        | -        | -      | -      | 0.262           | 0.156    | 9.32E-02 | -0.044 | 0.569  | 0.152           | 0.187    | 4.16E-01 | -0.215 | 0.519  | 1.194           | 0.494    | 1.58E-02 | 0.225  | 2.163  |
|                         | LDL cholesterol levels (in SD)                                                       | -                                                   | -        | -        | -      | -      | -               | -        | -        | -      | -      | -               | -        | -        | -      | -      | -0.696          | 0.339    | 4.02E-02 | -1.361 | -0.031 |
|                         | HDL cholesterol levels (in SD)                                                       | -                                                   | -        | -        | -      | -      | -               | -        | -        | -      | -      | -               | -        | -        | -      | -      | -0.279          | 0.243    | 2.51E-01 | -0.755 | 0.197  |
|                         | triglyceride levels (in SD)                                                          | -                                                   | -        | -        | -      | -      | -               | -        | -        | -      | -      | 0.223           | 0.181    | 2.19E-01 | -0.133 | 0.578  | 0.252           | 0.501    | 6.14E-01 | -0.729 | 1.234  |
|                         | glucose levels (in SD)                                                               | -                                                   | -        | -        | -      | -      | -               | -        | -        | -      | -      | -0.129          | 0.116    | 2.65E-01 | -0.356 | 0.098  | 1.106           | 0.562    | 4.92E-02 | 0.004  | 2.209  |
|                         | Tg(hsp70:IK17:EGFP; mpeg1:mCherry) carriers vs. Tg(mpo:EGFP; mpeg1:mCherry) carriers | -1.007                                              | 0.316    | 1.44E-03 | -1.626 | -0.387 | 0.019           | 0.477    | 9.69E-01 | -0.917 | 0.954  | -0.099          | 0.488    | 8.40E-01 | -1.055 | 0.858  | -               | -        | -        | -      | -      |
|                         | batch 1                                                                              | -1.223                                              | 0.459    | 7.65E-03 | -2.122 | -0.324 | -1.133          | 0.448    | 1.15E-02 | -2.011 | -0.254 | -0.670          | 0.516    | 1.94E-01 | -1.681 | 0.340  | -               | -        | -        | -      | -      |
|                         | batch 2                                                                              | -0.512                                              | 0.334    | 1.26E-01 | -1.167 | 0.143  | -0.113          | 0.374    | 7.63E-01 | -0.847 | 0.621  | 0.365           | 0.409    | 3.72E-01 | -0.437 | 1.166  | -               | -        | -        | -      | -      |
|                         | batch 3                                                                              | -0.964                                              | 0.393    | 1.41E-02 | -1.735 | -0.194 | -0.938          | 0.383    | 1.43E-02 | -1.688 | -0.187 | -0.615          | 0.454    | 1.75E-01 | -1.504 | 0.274  | -               | -        | -        | -      | -      |
|                         | batch 4                                                                              | -0.717                                              | 0.316    | 2.32E-02 | -1.337 | -0.098 | -0.553          | 0.346    | 1.09E-01 | -1.231 | 0.124  | -0.117          | 0.427    | 7.85E-01 | -0.955 | 0.721  | -               | -        | -        | -      | -      |
|                         | batch 8                                                                              | -5.338                                              | 0.946    | 1.67E-08 | -7.192 | -3.484 | -5.784          | 0.956    | 1.45E-09 | -7.658 | -3.911 | -5.495          | 0.952    | 7.76E-09 | -7.361 | -3.630 | -               | -        | -        | -      | -      |
|                         | batch 10                                                                             | -                                                   | -        | -        | -      | -      | -               | -        | -        | -      | -      | -               | -        | -        | -      | -      | 4.420           | 0.874    | 4.25E-07 | 2.707  | 6.133  |
| intercept               | 2.892                                                                                | 0.339                                               | 1.61E-17 | 2.226    | 3.557  | 2.734  | 0.353           | 1.02E-14 | 2.041    | 3.426  | 2.467  | 0.358           | 5.73E-12 | 1.765    | 3.169  | -2.943 | 0.840           | 4.56E-04 | -4.589   | -1.298 |        |

  

|                         |                                  | Vascular co-localization of oxLDL with macrophages |       |          |        |       |                 |       |          |        |       |                 |       |          |        |       |                 |       |          |        |       |
|-------------------------|----------------------------------|----------------------------------------------------|-------|----------|--------|-------|-----------------|-------|----------|--------|-------|-----------------|-------|----------|--------|-------|-----------------|-------|----------|--------|-------|
|                         |                                  | Model 1 (n=212)                                    |       |          |        |       | Model 2 (n=212) |       |          |        |       | Model 3 (n=209) |       |          |        |       | Model 4 (n=205) |       |          |        |       |
|                         |                                  | Effect                                             | SE    | P        | lci    | uci   | Effect          | SE    | P        | lci    | uci   | Effect          | SE    | P        | lci    | uci   | Effect          | SE    | P        | lci    | uci   |
| negative binomial terms | atorvastatin and ezetimibe       | 0.332                                              | 0.166 | 4.48E-02 | 0.008  | 0.656 | 0.392           | 0.163 | 1.61E-02 | 0.073  | 0.711 | 0.388           | 0.163 | 1.72E-02 | 0.069  | 0.707 | 0.285           | 0.166 | 8.57E-02 | -0.040 | 0.610 |
|                         | time of day (in hours since 9AM) | -0.019                                             | 0.027 | 4.88E-01 | -0.071 | 0.034 | -0.027          | 0.027 | 3.25E-01 | -0.080 | 0.027 | -0.036          | 0.028 | 1.91E-01 | -0.091 | 0.018 | -0.035          | 0.028 | 2.10E-01 | -0.091 | 0.020 |
|                         | body length (in SD)              | -                                                  | -     | -        | -      | -     | 0.154           | 0.094 | 1.03E-01 | -0.031 | 0.339 | 0.042           | 0.119 | 7.25E-01 | -0.192 | 0.276 | 0.048           | 0.120 | 6.88E-01 | -0.187 | 0.284 |
|                         | dorsal body surface area (in SD) | -                                                  | -     | -        | -      | -     | 0.200           | 0.074 | 6.56E-03 | 0.056  | 0.345 | 0.075           | 0.096 | 4.36E-01 | -0.114 | 0.264 | 0.061           | 0.096 | 5.28E-01 | -0.128 | 0.250 |
|                         | LDL cholesterol levels (in SD)   | -                                                  | -     | -        | -      | -     | -               | -     | -        | -      | -     | -               | -     | -        | -      | -     | -0.122          | 0.069 | 7.59E-02 | -0.257 | 0.013 |
|                         | HDL cholesterol levels (in SD)   | -                                                  | -     | -        | -      | -     | -               | -     | -        | -      | -     | -               | -     | -        | -      | -     | 0.021           | 0.078 | 7.86E-01 | -0.132 | 0.174 |
|                         | triglyceride levels (in SD)      | -                                                  | -     | -        | -      | -     | -               | -     | -        | -      | -     | 0.237           | 0.125 | 5.72E-02 | -0.007 | 0.481 | 0.303           | 0.132 | 2.16E-02 | 0.044  | 0.561 |
|                         | glucose levels (in SD)           | -                                                  | -     | -        | -      | -     | -               | -     | -        | -      | -     | -0.102          | 0.107 | 3.39E-01 | -0.311 | 0.107 | -0.177          | 0.120 | 1.41E-01 | -0.412 | 0.058 |
|                         | batch 9                          | -0.359                                             | 0.211 | 8.86E-02 | -0.771 | 0.054 | -0.342          | 0.225 | 1.29E-01 | -0.783 | 0.099 | -0.213          | 0.228 | 3.52E-01 | -0.660 | 0.235 | -0.137          | 0.237 | 5.63E-01 | -0.602 | 0.328 |
|                         | batch 10                         | 0.868                                              | 0.169 | 2.57E-07 | 0.538  | 1.198 | 0.682           | 0.191 | 3.66E-04 | 0.307  | 1.057 | 0.745           | 0.191 | 9.31E-05 | 0.371  | 1.119 | 0.712           | 0.198 | 3.15E-04 | 0.325  | 1.100 |
|                         | intercept                        | 3.020                                              | 0.173 | 2.44E-68 | 2.682  | 3.359 | 3.190           | 0.187 | 5.89E-65 | 2.822  | 3.557 | 3.106           | 0.215 | 1.75E-47 | 2.686  | 3.527 | 3.026           | 0.236 | 1.32E-37 | 2.564  | 3.489 |

  

|                |                                  | Vascular infiltration by neutrophils |       |          |        |       |                 |       |          |        |       |                 |       |          |        |       |                        |  |  |  |  |
|----------------|----------------------------------|--------------------------------------|-------|----------|--------|-------|-----------------|-------|----------|--------|-------|-----------------|-------|----------|--------|-------|------------------------|--|--|--|--|
|                |                                  | Model 1 (n=404)                      |       |          |        |       | Model 2 (n=404) |       |          |        |       | Model 3 (n=359) |       |          |        |       |                        |  |  |  |  |
|                |                                  | Effect                               | SE    | P        | lci    | uci   | Effect          | SE    | P        | lci    | uci   | Effect          | SE    | P        | lci    | uci   |                        |  |  |  |  |
| fixed factors  | atorvastatin and ezetimibe       | 0.088                                | 0.083 | 2.87E-01 | -0.074 | 0.251 | 0.080           | 0.083 | 3.36E-01 | -0.083 | 0.242 | 0.052           | 0.089 | 5.60E-01 | -0.123 | 0.227 | <i>no observations</i> |  |  |  |  |
|                | time of day (in hours since 9AM) | 0.023                                | 0.021 | 2.76E-01 | -0.018 | 0.063 | 0.020           | 0.021 | 3.49E-01 | -0.022 | 0.062 | 0.003           | 0.023 | 8.83E-01 | -0.041 | 0.048 |                        |  |  |  |  |
|                | body length (in SD)              | -                                    | -     | -        | -      | -     | 0.100           | 0.055 | 6.61E-02 | -0.007 | 0.207 | 0.111           | 0.057 | 5.06E-02 | 0.000  | 0.223 |                        |  |  |  |  |
|                | dorsal body surface area (in SD) | -                                    | -     | -        | -      | -     | -0.005          | 0.057 | 9.28E-01 | -0.117 | 0.106 | -0.015          | 0.062 | 8.13E-01 | -0.137 | 0.107 |                        |  |  |  |  |
|                | triglyceride levels (in SD)      | -                                    | -     | -        | -      | -     | -               | -     | -        | -      | -     | 0.020           | 0.051 | 7.02E-01 | -0.081 | 0.120 |                        |  |  |  |  |
|                | glucose levels (in SD)           | -                                    | -     | -        | -      | -     | -               | -     | -        | -      | -     | 0.034           | 0.040 | 3.92E-01 | -0.044 | 0.112 |                        |  |  |  |  |
|                | intercept                        | -0.012                               | 0.151 | 9.34E-01 | -0.308 | 0.283 | -0.006          | 0.144 | 9.68E-01 | -0.288 | 0.276 | 0.048           | 0.148 | 7.45E-01 | -0.242 | 0.338 |                        |  |  |  |  |
| random factors | <i>variation by batch</i>        | 0.234                                | 0.086 | -        | 0.114  | 0.479 | 0.208           | 0.080 | -        | 0.098  | 0.441 | 0.205           | 0.083 | -        | 0.093  | 0.452 |                        |  |  |  |  |
|                | <i>residual</i>                  | 0.831                                | 0.029 | -        | 0.775  | 0.891 | 0.827           | 0.029 | -        | 0.772  | 0.887 | 0.812           | 0.031 | -        | 0.754  | 0.874 |                        |  |  |  |  |

continued Supplementary Table 9

|                         |                                  | Vascular co-localization of lipids with neutrophils |          |          |        |        |                 |          |          |        |        |                 |          |          |        |        |                        |
|-------------------------|----------------------------------|-----------------------------------------------------|----------|----------|--------|--------|-----------------|----------|----------|--------|--------|-----------------|----------|----------|--------|--------|------------------------|
|                         |                                  | Model 1 (n=393)                                     |          |          |        |        | Model 2 (n=393) |          |          |        |        | Model 3 (n=348) |          |          |        |        |                        |
|                         |                                  | Effect                                              | SE       | P        | lci    | uci    | Effect          | SE       | P        | lci    | uci    | Effect          | SE       | P        | lci    | uci    |                        |
| negative binomial terms | atorvastatin and ezetimibe       | -1.113                                              | 0.395    | 4.87E-03 | -1.888 | -0.338 | -1.297          | 0.433    | 2.76E-03 | -2.146 | -0.448 | -1.518          | 0.578    | 8.67E-03 | -2.652 | -0.385 | <i>no observations</i> |
|                         | time of day (in hours since 9AM) | -0.094                                              | 0.095    | 3.25E-01 | -0.281 | 0.093  | -0.168          | 0.106    | 1.15E-01 | -0.376 | 0.041  | -0.120          | 0.120    | 3.18E-01 | -0.355 | 0.115  |                        |
|                         | body length (in SD)              | -                                                   | -        | -        | -      | -      | -1.512          | 0.322    | 2.64E-06 | -2.143 | -0.881 | -1.501          | 0.328    | 4.61E-06 | -2.143 | -0.859 |                        |
|                         | dorsal body surface area (in SD) | -                                                   | -        | -        | -      | -      | 0.317           | 0.314    | 3.13E-01 | -0.299 | 0.934  | 0.207           | 0.366    | 5.72E-01 | -0.511 | 0.925  |                        |
|                         | triglyceride levels (in SD)      | -                                                   | -        | -        | -      | -      | -               | -        | -        | -      | -      | -0.043          | 0.232    | 8.52E-01 | -0.499 | 0.412  |                        |
|                         | glucose levels (in SD)           | -                                                   | -        | -        | -      | -      | -               | -        | -        | -      | -      | 0.193           | 0.241    | 4.23E-01 | -0.280 | 0.667  |                        |
|                         | batch 1                          | -1.376                                              | 1.000    | 1.69E-01 | -3.335 | 0.584  | -1.183          | 0.820    | 1.49E-01 | -2.790 | 0.424  | -0.936          | 0.866    | 2.80E-01 | -2.632 | 0.761  |                        |
|                         | batch 2                          | -2.393                                              | 0.517    | 3.60E-06 | -3.406 | -1.381 | -0.732          | 0.654    | 2.63E-01 | -2.015 | 0.551  | -0.237          | 0.674    | 7.25E-01 | -1.558 | 1.084  |                        |
|                         | batch 3                          | -1.164                                              | 0.563    | 3.87E-02 | -2.267 | -0.061 | -0.051          | 0.588    | 9.32E-01 | -1.204 | 1.103  | 0.349           | 0.796    | 6.61E-01 | -1.211 | 1.909  |                        |
|                         | batch 4                          | -0.811                                              | 0.479    | 9.01E-02 | -1.750 | 0.127  | 0.545           | 0.732    | 4.56E-01 | -0.889 | 1.979  | 0.841           | 0.767    | 2.73E-01 | -0.662 | 2.344  |                        |
| intercept               | 1.997                            | 0.526                                               | 1.45E-04 | 0.967    | 3.027  | 1.290  | 0.612           | 3.52E-02 | 0.090    | 2.491  | 0.737  | 0.676           | 2.76E-01 | -0.588   | 2.062  |        |                        |

  

|               |                                  | Vascular co-localization of macrophages with neutrophils |       |          |        |       |                 |       |          |        |       |                 |       |          |        |       |                        |  |
|---------------|----------------------------------|----------------------------------------------------------|-------|----------|--------|-------|-----------------|-------|----------|--------|-------|-----------------|-------|----------|--------|-------|------------------------|--|
|               |                                  | Model 1 (n=394)                                          |       |          |        |       | Model 2 (n=394) |       |          |        |       | Model 3 (n=349) |       |          |        |       |                        |  |
|               |                                  | Effect                                                   | SE    | P        | lci    | uci   | Effect          | SE    | P        | lci    | uci   | Effect          | SE    | P        | lci    | uci   |                        |  |
| fixed factors | atorvastatin and ezetimibe       | 0.139                                                    | 0.092 | 1.29E-01 | -0.041 | 0.319 | 0.136           | 0.092 | 1.39E-01 | -0.044 | 0.316 | 0.159           | 0.100 | 1.10E-01 | -0.036 | 0.355 | <i>no observations</i> |  |
|               | time of day (in hours since 9AM) | 0.033                                                    | 0.023 | 1.45E-01 | -0.011 | 0.078 | 0.034           | 0.024 | 1.49E-01 | -0.012 | 0.080 | 0.026           | 0.025 | 2.97E-01 | -0.023 | 0.076 |                        |  |
|               | body length (in SD)              | -                                                        | -     | -        | -      | -     | 0.036           | 0.060 | 5.48E-01 | -0.082 | 0.154 | 0.062           | 0.063 | 3.28E-01 | -0.062 | 0.186 |                        |  |
|               | dorsal body surface area (in SD) | -                                                        | -     | -        | -      | -     | -0.016          | 0.063 | 8.04E-01 | -0.140 | 0.109 | -0.092          | 0.070 | 1.89E-01 | -0.230 | 0.045 |                        |  |
|               | triglyceride levels (in SD)      | -                                                        | -     | -        | -      | -     | -               | -     | -        | -      | -     | 0.077           | 0.057 | 1.80E-01 | -0.035 | 0.188 |                        |  |
|               | glucose levels (in SD)           | -                                                        | -     | -        | -      | -     | -               | -     | -        | -      | -     | 0.085           | 0.044 | 5.55E-02 | -0.002 | 0.172 |                        |  |
|               | intercept                        | -0.178                                                   | 0.149 | 2.32E-01 | -0.471 | 0.114 | -0.182          | 0.149 | 2.23E-01 | -0.474 | 0.111 | -0.190          | 0.166 | 2.51E-01 | -0.515 | 0.135 |                        |  |
|               | random factors                   | <i>variation by batch</i>                                | 0.200 | 0.080    | -      | 0.092 | 0.438           | 0.194 | 0.079    | -      | 0.087 | 0.432           | 0.234 | 0.094    | -      | 0.107 | 0.512                  |  |
|               |                                  | <i>residual</i>                                          | 0.906 | 0.032    | -      | 0.845 | 0.972           | 0.906 | 0.032    | -      | 0.844 | 0.972           | 0.894 | 0.034    | -      | 0.830 | 0.964                  |  |

  

|                 |                                  | Endothelial thickness     |       |          |        |       |                 |       |          |        |       |                 |       |          |        |       |                 |       |          |        |       |
|-----------------|----------------------------------|---------------------------|-------|----------|--------|-------|-----------------|-------|----------|--------|-------|-----------------|-------|----------|--------|-------|-----------------|-------|----------|--------|-------|
|                 |                                  | Model 1 (n=185)           |       |          |        |       | Model 2 (n=185) |       |          |        |       | Model 3 (n=184) |       |          |        |       | Model 4 (n=162) |       |          |        |       |
|                 |                                  | Effect                    | SE    | P        | lci    | uci   | Effect          | SE    | P        | lci    | uci   | Effect          | SE    | P        | lci    | uci   | Effect          | SE    | P        | lci    | uci   |
| fixed factors   | atorvastatin and ezetimibe       | -0.085                    | 0.163 | 6.00E-01 | -0.404 | 0.234 | -0.083          | 0.164 | 6.14E-01 | -0.405 | 0.239 | -0.036          | 0.160 | 8.22E-01 | -0.350 | 0.277 | -0.036          | 0.174 | 8.36E-01 | -0.377 | 0.305 |
|                 | time of day (in hours since 9AM) | 0.031                     | 0.037 | 4.05E-01 | -0.042 | 0.103 | 0.030           | 0.037 | 4.15E-01 | -0.042 | 0.102 | 0.014           | 0.036 | 6.87E-01 | -0.056 | 0.085 | -0.002          | 0.035 | 9.48E-01 | -0.071 | 0.066 |
|                 | body length (in SD)              | -                         | -     | -        | -      | -     | -0.029          | 0.094 | 7.59E-01 | -0.214 | 0.156 | -0.113          | 0.094 | 2.30E-01 | -0.297 | 0.071 | -0.113          | 0.094 | 2.32E-01 | -0.297 | 0.072 |
|                 | dorsal body surface area (in SD) | -                         | -     | -        | -      | -     | 0.075           | 0.093 | 4.19E-01 | -0.107 | 0.257 | 0.020           | 0.092 | 8.31E-01 | -0.161 | 0.200 | 0.007           | 0.098 | 9.39E-01 | -0.185 | 0.200 |
|                 | LDL cholesterol levels (in SD)   | -                         | -     | -        | -      | -     | -               | -     | -        | -      | -     | -               | -     | -        | -      | -     | 0.001           | 0.092 | 9.92E-01 | -0.180 | 0.182 |
|                 | HDL cholesterol levels (in SD)   | -                         | -     | -        | -      | -     | -               | -     | -        | -      | -     | -               | -     | -        | -      | -     | -0.057          | 0.105 | 5.84E-01 | -0.263 | 0.148 |
|                 | triglyceride levels (in SD)      | -                         | -     | -        | -      | -     | -               | -     | -        | -      | -     | 0.390           | 0.107 | 2.71E-04 | 0.180  | 0.600 | 0.428           | 0.113 | 1.47E-04 | 0.207  | 0.648 |
|                 | glucose levels (in SD)           | -                         | -     | -        | -      | -     | -               | -     | -        | -      | -     | -0.341          | 0.180 | 5.76E-02 | -0.693 | 0.011 | -0.241          | 0.179 | 1.79E-01 | -0.593 | 0.111 |
|                 | intercept                        | 0.073                     | 0.190 | 7.03E-01 | -0.301 | 0.446 | 0.015           | 0.197 | 9.39E-01 | -0.371 | 0.401 | -0.122          | 0.190 | 5.20E-01 | -0.495 | 0.250 | -0.127          | 0.190 | 5.04E-01 | -0.499 | 0.245 |
|                 | random factors                   | <i>variation by batch</i> | 0.181 | 0.106    | -      | 0.058 | 0.572           | 0.167 | 0.105    | -      | 0.048 | 0.576           | 0.114 | 0.105    | -      | 0.019 | 0.692           | 0.000 | 0.000    | -      | 0.000 |
| <i>residual</i> |                                  | 0.976                     | 0.051 | -        | 0.881  | 1.081 | 0.974           | 0.051 | -        | 0.879  | 1.080 | 0.938           | 0.049 | -        | 0.846  | 1.040 | 0.890           | 0.049 | -        | 0.798  | 0.992 |

Endothelial thickness is defined as surface area of the endothelium normalized for surface area of the circulating lipids. Associations were examined using negative binomial regression for outcomes that showed a negative binomial distribution; and using hierarchical linear models on inverse normally transformed outcomes for outcomes that were (borderline) normally distributed (i.e. vascular accumulation of oxLDL; vascular infiltration by macrophages and neutrophils; endothelial thickness). Model 1: adjusted for time of day, transgenic background and batch; Model 2: additionally adjusted for body length and dorsal body surface area; Model 3: additionally adjusted for whole-body LDL cholesterol, HDL cholesterol, triglyceride and glucose levels. Dorsal body surface area was normalized for body length using residuals; whole-body LDL cholesterol, HDL cholesterol, triglyceride and glucose levels were normalized for protein level using residuals. Effects shown for atorvastatin and ezetimibe treatment are compared with untreated controls. Lci and uci are lower and upper boundaries of the 95% confidence interval.

Supplementary Table 10 - The effect of treatment with atorvastatin and ezetimibe on suboptimal image or image quantification quality

|                                  | Vasculature not properly detected |       |          |       |       |                 |       |          |       |       |                 |       |          |       |       |                 |       |          |       |       |
|----------------------------------|-----------------------------------|-------|----------|-------|-------|-----------------|-------|----------|-------|-------|-----------------|-------|----------|-------|-------|-----------------|-------|----------|-------|-------|
|                                  | Model 1 (n=927)                   |       |          |       |       | Model 2 (n=927) |       |          |       |       | Model 3 (n=876) |       |          |       |       | Model 4 (n=454) |       |          |       |       |
|                                  | OR                                | SE    | P        | lci   | uci   | OR              | SE    | P        | lci   | uci   | OR              | SE    | P        | lci   | uci   | OR              | SE    | P        | lci   | uci   |
| atorvastatin and ezetimibe       | 0.910                             | 0.200 | 6.85E-01 | 0.590 | 1.410 | 0.890           | 0.200 | 6.04E-01 | 0.580 | 1.380 | 0.910           | 0.210 | 6.95E-01 | 0.580 | 1.440 | 0.390           | 0.140 | 6.59E-03 | 0.200 | 0.770 |
| time of day (in hours since 9AM) | 1.040                             | 0.050 | 4.72E-01 | 0.940 | 1.150 | 1.030           | 0.050 | 5.35E-01 | 0.930 | 1.140 | 1.050           | 0.050 | 3.38E-01 | 0.950 | 1.160 | 1.100           | 0.080 | 1.69E-01 | 0.960 | 1.270 |
| body length (in SD)              | -                                 | -     | -        | -     | -     | 0.880           | 0.100 | 2.85E-01 | 0.700 | 1.110 | 0.870           | 0.110 | 2.43E-01 | 0.680 | 1.100 | 0.840           | 0.170 | 3.89E-01 | 0.570 | 1.250 |
| dorsal body surface area (in SD) | -                                 | -     | -        | -     | -     | 1.180           | 0.130 | 1.48E-01 | 0.940 | 1.460 | 1.420           | 0.180 | 4.62E-03 | 1.110 | 1.820 | 1.570           | 0.310 | 2.20E-02 | 1.070 | 2.320 |
| LDL cholesterol levels (in SD)   | -                                 | -     | -        | -     | -     | -               | -     | -        | -     | -     | -               | -     | -        | -     | -     | 0.880           | 0.150 | 4.53E-01 | 0.630 | 1.230 |
| HDL cholesterol levels (in SD)   | -                                 | -     | -        | -     | -     | -               | -     | -        | -     | -     | -               | -     | -        | -     | -     | 0.780           | 0.140 | 1.54E-01 | 0.550 | 1.100 |
| triglyceride levels (in SD)      | -                                 | -     | -        | -     | -     | -               | -     | -        | -     | -     | 0.670           | 0.080 | 1.26E-03 | 0.520 | 0.850 | 0.600           | 0.150 | 3.77E-02 | 0.380 | 0.970 |
| glucose levels (in SD)           | -                                 | -     | -        | -     | -     | -               | -     | -        | -     | -     | 0.850           | 0.100 | 1.70E-01 | 0.680 | 1.070 | 0.930           | 0.240 | 7.86E-01 | 0.560 | 1.550 |
| intercept                        | 0.100                             | 0.030 | 8.39E-18 | 0.060 | 0.170 | 0.100           | 0.030 | 3.43E-17 | 0.060 | 0.170 | 0.090           | 0.030 | 9.41E-18 | 0.050 | 0.160 | 0.110           | 0.040 | 4.05E-08 | 0.050 | 0.250 |

  

|                                  | Many false positive lipid deposits |       |          |       |       |                 |       |          |       |       |                 |       |          |       |       |                 |       |          |       |       |
|----------------------------------|------------------------------------|-------|----------|-------|-------|-----------------|-------|----------|-------|-------|-----------------|-------|----------|-------|-------|-----------------|-------|----------|-------|-------|
|                                  | Model 1 (n=853)                    |       |          |       |       | Model 2 (n=853) |       |          |       |       | Model 3 (n=804) |       |          |       |       | Model 4 (n=421) |       |          |       |       |
|                                  | OR                                 | SE    | P        | lci   | uci   | OR              | SE    | P        | lci   | uci   | OR              | SE    | P        | lci   | uci   | OR              | SE    | P        | lci   | uci   |
| atorvastatin and ezetimibe       | 0.440                              | 0.230 | 1.23E-01 | 0.150 | 1.250 | 0.460           | 0.250 | 1.48E-01 | 0.160 | 1.320 | 0.780           | 0.440 | 6.62E-01 | 0.260 | 2.370 | 0.520           | 0.320 | 2.87E-01 | 0.150 | 1.740 |
| time of day (in hours since 9AM) | 1.010                              | 0.110 | 9.45E-01 | 0.820 | 1.250 | 1.010           | 0.110 | 9.39E-01 | 0.820 | 1.250 | 0.960           | 0.100 | 7.20E-01 | 0.780 | 1.190 | 1.030           | 0.120 | 7.80E-01 | 0.830 | 1.280 |
| body length (in SD)              | -                                  | -     | -        | -     | -     | 1.430           | 0.380 | 1.69E-01 | 0.860 | 2.400 | 1.010           | 0.280 | 9.58E-01 | 0.590 | 1.750 | 1.000           | 0.310 | 9.93E-01 | 0.540 | 1.840 |
| dorsal body surface area (in SD) | -                                  | -     | -        | -     | -     | 1.170           | 0.280 | 5.23E-01 | 0.730 | 1.870 | 0.950           | 0.270 | 8.44E-01 | 0.550 | 1.640 | 1.350           | 0.470 | 3.91E-01 | 0.680 | 2.680 |
| LDL cholesterol levels (in SD)   | -                                  | -     | -        | -     | -     | -               | -     | -        | -     | -     | -               | -     | -        | -     | -     | 0.650           | 0.180 | 1.09E-01 | 0.380 | 1.100 |
| HDL cholesterol levels (in SD)   | -                                  | -     | -        | -     | -     | -               | -     | -        | -     | -     | -               | -     | -        | -     | -     | 0.950           | 0.250 | 8.48E-01 | 0.570 | 1.590 |
| triglyceride levels (in SD)      | -                                  | -     | -        | -     | -     | -               | -     | -        | -     | -     | 2.500           | 0.820 | 5.08E-03 | 1.320 | 4.750 | 2.640           | 1.050 | 1.49E-02 | 1.210 | 5.770 |
| glucose levels (in SD)           | -                                  | -     | -        | -     | -     | -               | -     | -        | -     | -     | 0.370           | 0.110 | 8.64E-04 | 0.210 | 0.670 | 0.400           | 0.150 | 1.70E-02 | 0.190 | 0.850 |
| intercept                        | 0.030                              | 0.020 | 3.80E-11 | 0.010 | 0.080 | 0.030           | 0.010 | 2.63E-11 | 0.010 | 0.070 | 0.010           | 0.010 | 2.61E-12 | 0.000 | 0.050 | 0.020           | 0.010 | 4.01E-09 | 0.010 | 0.080 |

  

|                                  | Larva moved during imaging |       |          |       |       |                 |       |          |       |       |                 |       |          |       |       |                 |       |          |       |        |
|----------------------------------|----------------------------|-------|----------|-------|-------|-----------------|-------|----------|-------|-------|-----------------|-------|----------|-------|-------|-----------------|-------|----------|-------|--------|
|                                  | Model 1 (n=873)            |       |          |       |       | Model 2 (n=873) |       |          |       |       | Model 3 (n=824) |       |          |       |       | Model 4 (n=440) |       |          |       |        |
|                                  | OR                         | SE    | P        | lci   | uci   | OR              | SE    | P        | lci   | uci   | OR              | SE    | P        | lci   | uci   | OR              | SE    | P        | lci   | uci    |
| atorvastatin and ezetimibe       | 3.510                      | 1.370 | 1.23E-03 | 1.640 | 7.530 | 3.410           | 1.370 | 2.17E-03 | 1.560 | 7.480 | 3.380           | 1.360 | 2.43E-03 | 1.540 | 7.430 | 2.060           | 0.950 | 1.19E-01 | 0.830 | 5.080  |
| time of day (in hours since 9AM) | 1.200                      | 0.100 | 3.36E-02 | 1.010 | 1.410 | 1.210           | 0.110 | 4.02E-02 | 1.010 | 1.450 | 1.220           | 0.110 | 3.11E-02 | 1.020 | 1.470 | 1.250           | 0.130 | 3.24E-02 | 1.020 | 1.540  |
| body length (in SD)              | -                          | -     | -        | -     | -     | 0.390           | 0.070 | 5.54E-07 | 0.270 | 0.560 | 0.410           | 0.080 | 3.24E-06 | 0.280 | 0.590 | 0.700           | 0.200 | 2.04E-01 | 0.400 | 1.220  |
| dorsal body surface area (in SD) | -                          | -     | -        | -     | -     | 1.430           | 0.240 | 3.66E-02 | 1.020 | 2.000 | 1.460           | 0.270 | 4.07E-02 | 1.020 | 2.100 | 1.580           | 0.390 | 6.33E-02 | 0.970 | 2.560  |
| LDL cholesterol levels (in SD)   | -                          | -     | -        | -     | -     | -               | -     | -        | -     | -     | -               | -     | -        | -     | -     | 0.820           | 0.200 | 4.10E-01 | 0.500 | 1.320  |
| HDL cholesterol levels (in SD)   | -                          | -     | -        | -     | -     | -               | -     | -        | -     | -     | -               | -     | -        | -     | -     | 0.600           | 0.160 | 5.92E-02 | 0.350 | 1.020  |
| triglyceride levels (in SD)      | -                          | -     | -        | -     | -     | -               | -     | -        | -     | -     | 0.920           | 0.200 | 7.07E-01 | 0.610 | 1.400 | 0.340           | 0.130 | 3.91E-03 | 0.160 | 0.700  |
| glucose levels (in SD)           | -                          | -     | -        | -     | -     | -               | -     | -        | -     | -     | 1.030           | 0.230 | 8.80E-01 | 0.670 | 1.590 | 8.660           | 4.850 | 1.16E-04 | 2.890 | 25.960 |
| intercept                        | 0.010                      | 0.000 | 5.15E-18 | 0.000 | 0.030 | 0.010           | 0.000 | 2.00E-17 | 0.000 | 0.020 | 0.010           | 0.000 | 6.94E-17 | 0.000 | 0.020 | 0.010           | 0.010 | 1.60E-09 | 0.000 | 0.060  |

  

|                                  | Many false positive oxLDL deposits |       |          |       |       |                 |       |          |       |       |                 |       |          |       |       |                 |       |          |       |       |
|----------------------------------|------------------------------------|-------|----------|-------|-------|-----------------|-------|----------|-------|-------|-----------------|-------|----------|-------|-------|-----------------|-------|----------|-------|-------|
|                                  | Model 1 (n=236)                    |       |          |       |       | Model 2 (n=236) |       |          |       |       | Model 3 (n=233) |       |          |       |       | Model 4 (n=229) |       |          |       |       |
|                                  | OR                                 | SE    | P        | lci   | uci   | OR              | SE    | P        | lci   | uci   | OR              | SE    | P        | lci   | uci   | OR              | SE    | P        | lci   | uci   |
| atorvastatin and ezetimibe       | 0.480                              | 0.130 | 7.66E-03 | 0.280 | 0.820 | 0.520           | 0.150 | 1.96E-02 | 0.300 | 0.900 | 0.510           | 0.150 | 2.09E-02 | 0.290 | 0.900 | 0.520           | 0.160 | 3.14E-02 | 0.290 | 0.940 |
| time of day (in hours since 9AM) | 0.970                              | 0.060 | 5.51E-01 | 0.860 | 1.080 | 0.960           | 0.060 | 5.12E-01 | 0.850 | 1.080 | 0.960           | 0.060 | 5.09E-01 | 0.850 | 1.080 | 0.960           | 0.060 | 5.32E-01 | 0.850 | 1.090 |
| body length (in SD)              | -                                  | -     | -        | -     | -     | 1.570           | 0.250 | 4.91E-03 | 1.150 | 2.150 | 1.730           | 0.360 | 7.91E-03 | 1.160 | 2.600 | 1.820           | 0.390 | 4.50E-03 | 1.200 | 2.760 |
| dorsal body surface area (in SD) | -                                  | -     | -        | -     | -     | 1.370           | 0.230 | 5.87E-02 | 0.990 | 1.890 | 1.540           | 0.330 | 4.19E-02 | 1.020 | 2.340 | 1.640           | 0.350 | 2.27E-02 | 1.070 | 2.500 |
| LDL cholesterol levels (in SD)   | -                                  | -     | -        | -     | -     | -               | -     | -        | -     | -     | -               | -     | -        | -     | -     | 1.070           | 0.170 | 6.76E-01 | 0.780 | 1.470 |
| HDL cholesterol levels (in SD)   | -                                  | -     | -        | -     | -     | -               | -     | -        | -     | -     | -               | -     | -        | -     | -     | 1.440           | 0.260 | 3.96E-02 | 1.020 | 2.040 |
| triglyceride levels (in SD)      | -                                  | -     | -        | -     | -     | -               | -     | -        | -     | -     | 0.770           | 0.170 | 2.31E-01 | 0.490 | 1.190 | 0.810           | 0.190 | 3.67E-01 | 0.500 | 1.290 |
| glucose levels (in SD)           | -                                  | -     | -        | -     | -     | -               | -     | -        | -     | -     | 1.050           | 0.270 | 8.43E-01 | 0.640 | 1.730 | 0.890           | 0.260 | 6.92E-01 | 0.510 | 1.570 |
| intercept                        | 2.130                              | 0.680 | 1.88E-02 | 1.130 | 4.000 | 2.250           | 0.830 | 2.74E-02 | 1.090 | 4.620 | 2.320           | 1.070 | 6.90E-02 | 0.940 | 5.730 | 1.750           | 0.880 | 2.60E-01 | 0.660 | 4.670 |

Associations are shown for criteria that resulted in the exclusion of at least 10 larvae. Vasculature not properly detected typically resulted from weak staining, possibly due to low levels of circulating lipids; Many false positives: >20% of true negative objects were falsely detected by the qualification pipeline; Many false negatives: <20% of true positive objects were detected by the qualification pipeline. Associations were examined using logistic regression models. Model 1: adjusted for time of day; Model 2: additionally adjusted for body length and dorsal body surface area; Model 3: additionally adjusted for whole-body triglyceride and glucose levels; Model 4: additionally adjusted for whole-body LDL and HDL cholesterol levels. Dorsal body surface area was normalized for body length; whole-body LDL cholesterol, HDL cholesterol, triglyceride and glucose levels were normalized for protein level. Adjusting for transgenic background and batch would have excluded approximately half the larvae. Effects shown for atorvastatin and ezetimibe treatment are compared with untreated controls. Lci and uci are lower and upper boundaries of the 95% confidence interval.

**Supplementary Table 11 - Orthologues of proof-of-concept genes for dyslipidemia, atherosclerosis and coronary artery disease**

| Human gene  | ENSG            | Zebrafish orthologue | ENSDARG            | Target %identity | Query %identity | Main human protein | Top hit BLAST      | %identity (protein) | Conserved genes in locus          |
|-------------|-----------------|----------------------|--------------------|------------------|-----------------|--------------------|--------------------|---------------------|-----------------------------------|
| <i>APOE</i> | ENSG00000130203 | <i>apoea</i>         | ENSDARG00000102004 | 25.65            | 21.77           | ENSP00000252486    | ENSDARP00000137865 | 27.78               | <i>TOMM40</i>                     |
|             |                 | <i>apoeb</i>         | ENSDARG00000040295 | 28.11            | 24.92           |                    | ENSDARP00000119141 | 32.04               | <i>BCAM, NECTIN2</i>              |
| <i>APOB</i> | ENSG00000084674 | <i>apoba</i>         | ENSDARG00000042780 | 33.70            | 32.63           | ENSP00000233242    | ENSDARP00000062792 | 34.51               | <i>C2orf43, GDF7, ITSN2, PFN4</i> |
|             |                 | <i>apobb.1</i>       | ENSDARG00000022767 | 29.68            | 24.26           |                    | ENSDARP00000119179 | 30.33               | NA                                |
|             |                 | <i>apobb.2</i>       | ENSDARG00000075016 | 29.64            | 16.46           |                    | ENSDARP00000144532 | 37.37               | NA                                |
| <i>LDLR</i> | ENSG00000130164 | <i>ldlra</i>         | ENSDARG00000029476 | 52.80            | 55.93           | ENSP00000252444    | ENSDARP00000115492 | 58.69               | <i>SMARCA4, KR11, SPC24</i>       |
|             |                 | <i>ldlrB</i>         | ENSDARG00000026759 | 54.06            | 49.53           |                    | ENSDARP00000141207 | 58.57               | <i>SMARCA4, AP1M2, CDKN2D</i>     |

Target %identity: percentage of the orthologous sequence matching the human sequence; Query %identity: percentage of the human sequence matching the sequence of the orthologue; Main human protein: Ensembl protein ID for the main transcript; %identity protein: percentage of the aligned query (input sequence, i.e. main human protein) which is identical to the subject (hit) sequence; conserved genes in locus: neighbouring genes conserved across danio rerio and homo sapiens locus according to Genomicus.



Supplementary Table 12 - Identification of moderate-to-highly active CRISPR-Cas9 guide RNAs for proof-of-concept genes

| Human gene          | Zebrafish orthologue        | CRISPR gRNA target sequence | Genomic location (danRer11/GRCz11) |                   | Exon            | Strand    | GC (%)    | Self-complementarity | Off-targets |          |             |             | Predicted efficiency | CRISPRscan score       | Canonical (yes/no)           | Target activity (NA <sup>a</sup> , no <sup>b</sup> , low; moderate <sup>c</sup> , high <sup>d</sup> or very high <sup>e</sup> ) | Forward primer                | Reverse primer              | Product size |
|---------------------|-----------------------------|-----------------------------|------------------------------------|-------------------|-----------------|-----------|-----------|----------------------|-------------|----------|-------------|-------------|----------------------|------------------------|------------------------------|---------------------------------------------------------------------------------------------------------------------------------|-------------------------------|-----------------------------|--------------|
|                     |                             |                             | Chr                                | Pos               |                 |           |           |                      | 0           | 1        | 2           | 3           |                      |                        |                              |                                                                                                                                 |                               |                             |              |
|                     |                             |                             |                                    |                   |                 |           |           |                      |             |          |             |             |                      |                        |                              |                                                                                                                                 |                               |                             |              |
| APOE                | apoeba                      | GGCTCTCTCTCGCGGTAAG         | 19                                 | 10,856,063        | 3 of 4          | -         | 65        | 0                    | 0           | 0        | 0           | 0.42        | 54                   | yes                    | high                         | AGCACACTGATCTCTGACAGC                                                                                                           | GATCCTTCGCCCTCCTCCATG         | 160                         |              |
|                     |                             | GGATGAGCCAAGAAGCCGCT        | 19                                 | 10,855,768        | 2 of 4          | +         | 60        | 2                    | 0           | 0        | 0           | 0.52        | 37                   | yes                    | moderate                     | TCCGTTTTGACTTTTGCAGGC                                                                                                           | GAGCTGAGTGGCCCTTGATGT         | 155                         |              |
|                     | apoeb                       | GgGGGGCATCAGCCGGAAC         | 16                                 | 23,961,545        | 2 of 4          | -         | 65        | 1                    | 0           | 0        | 0           | 1           | 0.61                 | 59                     | no                           | very high                                                                                                                       | TGCCTGACTTGCTAATGTGAT         | CCGTGAGTTGTGTGTGAGTT        | 178          |
|                     |                             | GgTGACGTGAAGAACCCTGT        | 16                                 | 23,962,014        | 3 of 4          | +         | 50        | 0                    | 0           | 0        | 2           | 0.62        | 68                   | no                     | very high                    | AGTGAANAATCTCCAACCAGCA                                                                                                          | TGAAGGAGCATCCCAACTTACT        | 269                         |              |
|                     |                             | <b>GAGGGGCATCAGCCGGAAC</b>  | <b>16</b>                          | <b>23,961,545</b> | <b>2 of 4</b>   | -         | <b>65</b> | <b>1</b>             | <b>0</b>    | <b>0</b> | <b>0</b>    | <b>1</b>    | <b>0.61</b>          | <b>59</b>              | <b>no</b>                    | <b>high</b>                                                                                                                     | <b>CTGTAAATGGCTGACTTGCTAA</b> | <b>GCCCTTGATGTTTTGCACCA</b> | <b>208</b>   |
|                     |                             | GgTGACGTGAAGAACCCTGT        | 16                                 | 23,962,014        | 3 of 4          | +         | 50        | 0                    | 0           | 0        | 2           | 0.62        | 68                   | no                     | high                         | CTGCTGGTCAGCTCAGTAAAGA                                                                                                          | TGAAGGAGCATCCCAACTTACT        | 226                         |              |
|                     |                             | GgGGATCTCTGGGAGTAGG         | 16                                 | 23,962,897        | 4 of 4          | -         | 60        | 0                    | 0           | 0        | 0           | 0.59        | 85                   | no                     | moderate                     | AGGAGAAGCTGGAGGAGACAG                                                                                                           | CTCTTAAGCCTGAGTGGGAAGA        | 170                         |              |
|                     |                             | GgCATACATGAGCCAGGCC         | 16                                 | 23,962,700        | 4 of 4          | +         | 65        | 1                    | 0           | 0        | 0           | 0.58        | 59                   | no                     | moderate                     | GCAACCTACATGAGTGAGATGC                                                                                                          | GTAGGTTCTCGGCTGTCTCCT         | 220                         |              |
|                     |                             | GAACTCAACACAAACTGA          | 16                                 | 23,961,615        | 2 of 4          | +         | 40        | 0                    | 0           | 0        | 8           | 0.70        | 25                   | no                     | no                           | CTCCAACCAGATGACCCC                                                                                                              | CAGTTTGGCTGTGTAGGTC           | 201                         |              |
|                     |                             | <b>gGGGAGGGCTCTATCTTAGG</b> | <b>17</b>                          | <b>30,717,989</b> | <b>24 of 29</b> | +         | <b>55</b> | <b>0</b>             | <b>0</b>    | <b>0</b> | <b>0</b>    | <b>0.69</b> | <b>100</b>           | <b>no</b>              | <b>high</b>                  | <b>CGCACTTTGGAATTCCTCTTAC</b>                                                                                                   | <b>TCAATTTGTATGACAGGGGTG</b>  | <b>185</b>                  |              |
| gGATGAGGCACAGCAGAGG | 17                          | 30,708,635                  | 9 of 29                            | +                 | 60              | 0         | 0         | 0                    | 12          | 0.74     | 61          | no          | high                 | CTCACATGGCAGACACTCTTTC | GGCCATACACTCAGCATATCTCT      | 172                                                                                                                             |                               |                             |              |
| APOB                | apobb.1                     | GGACACATCTGTGGTGGCG         | 17                                 | 30,705,707        | 4 of 29         | -         | 60        | 1                    | 0           | 0        | 5           | 0.64        | 48                   | yes                    | no                           | ATGTCACAACCTCTGCAGCTAA                                                                                                          | ACTTCTCCATAGTGCCTGAAA         | 944                         |              |
|                     |                             | GGAAGCACTGAGGTTGCTG         | 17                                 | 30,704,770        | 2 of 29         | +         | 55        | 1                    | 0           | 0        | 7           | 0.60        | 35                   | no                     | no                           | AGGCCGCCCTATTAATTCAGTT                                                                                                          | ATGTCACAACCTCTGCAGCTAA        | 173                         |              |
|                     |                             | GgAGTATGGTATCTCCTCAG        | 17                                 | 30,708,080        | 8 of 29         | +         | 50        | 0                    | 0           | 0        | 0           | 0.59        | 74                   | no                     | no                           | ATTTTTGTAAAGGGTGGGAACA                                                                                                          | AAAAGCAACACCCATTTTCAT         | 224                         |              |
|                     |                             | GgTGCTTTTTTGCAGGCGAG        | 17                                 | 30,709,180        | 11 of 29        | -         | 57        | 1                    | 0           | 0        | 0           | 0.71        | 44                   | no                     | no                           | TCATTGGTGTGATGGGAAAATA                                                                                                          | CACATAGAAACAGAAAATCCCC        | 260                         |              |
|                     |                             | <b>GgAGCTGACAAGTACCAAG</b>  | <b>20</b>                          | <b>31,273,917</b> | <b>13 of 27</b> | +         | <b>50</b> | <b>0</b>             | <b>0</b>    | <b>0</b> | <b>1</b>    | <b>0.75</b> | <b>54</b>            | <b>no</b>              | <b>high</b>                  | <b>CCCTGATGGTATTTGATGGATT</b>                                                                                                   | <b>GGCCTAGAGTGAGAGGAGAACA</b> | <b>228</b>                  |              |
|                     |                             | gGGAGTTGAGTTTGTGACGG        | 20                                 | 31,274,651        | 16 of 27        | +         | 50        | 0                    | 0           | 0        | 0           | 0.61        | 81                   | no                     | moderate                     | AACCTGTCTCGTACATGGTATG                                                                                                          | TTGAGACCACCTCTCGTGGTAGA       | 227                         |              |
| apobb.2             | GAGCCAGTTTCAGTGGCGTG        | 20                          | 31,273,334                         | 11 of 27          | -               | 60        | 2         | 0                    | 0           | 22       | 0.47        | 38          | no                   | moderate               | GCAGAGAGGTGCTAATGAAGGT       | TGTATACTCACTCCCGGTCTC                                                                                                           | 222                           |                             |              |
|                     | GgTTCATCCAGATTTGCAG         | 20                          | 31,277,737                         | 24 of 27          | -               | 45        | 0         | 0                    | 0           | 8        | 0.73        | 47          | no                   | moderate               | TTGACACTTTGTTTGGAAATCG       | CCATTGAATTTGTTCTGGAGTG                                                                                                          | 217                           |                             |              |
|                     | GAAATCAAGCAGCAAGATGG        | 20                          | 31,277,192                         | 24 of 27          | +               | 45        | 0         | 0                    | 1           | 5        | 0.70        | -           | no                   | moderate               | TGTTTAGGATCAACCTTCTCTGG      | ATTCAAAGGACCAGCCTTGATA                                                                                                          | 279                           |                             |              |
|                     | GGCTCTATTTTCTCCATTTG        | 20                          | 31,272,363                         | 8 of 27           | -               | 40        | 0         | 0                    | 0           | 8        | 0.32        | 21          | yes                  | no                     | CAGTCCATCCAATTCAGACAA        | TACAGAGGAACGGTCAAAGGTT                                                                                                          | 275                           |                             |              |
|                     | <b>gGATTAGCTGAGCAAGAGGA</b> | <b>20</b>                   | <b>53,444,329</b>                  | <b>5 of 22</b>    | -               | <b>45</b> | <b>1</b>  | <b>0</b>             | <b>0</b>    | <b>7</b> | <b>0.61</b> | <b>49</b>   | <b>no</b>            | <b>moderate</b>        | <b>GTGGCCAGCATTAAGACATTT</b> | <b>AACAAAATAGCAGGGATGCCT</b>                                                                                                    | <b>226</b>                    |                             |              |
|                     | gGGCAGCCTGTTGGACTGCA        | 20                          | 53,445,660                         | 9 of 22           | -               | 60        | 5         | 0                    | 0           | 0        | 0.40        | 80          | no                   | moderate               | AACATGGTGGCTGCACTAGG         | AGCACTTCTCTTCCCTGTAGG                                                                                                           | 227                           |                             |              |
| LDLR                | ldlrb                       | gGGAGTCCACAAGTGAGATCC       | 20                                 | 53,445,352        | 8 of 22         | +         | 55        | 1                    | 0           | 0        | 1           | 0.50        | 66                   | no                     | low                          | TGCCAAGGTATTTGGGTTAGATT                                                                                                         | AAAAACATGTCCTGGTCACT          | 216                         |              |
|                     |                             | gGACAAGTTCAGACCCATCG        | 20                                 | 53,443,193        | 4 of 22         | +         | 50        | 1                    | 0           | 0        | 2           | 0.59        | 38                   | no                     | no                           | CCCAGCATCTATGGTCTGTGTA                                                                                                          | TTTAATGGAATTGCACCAGTTG        | 234                         |              |
|                     |                             | GATCCCCCTCTTAATGTTG         | 20                                 | 53,442,015        | 3 of 22         | -         | 45        | 0                    | 0           | 0        | 2           | 0.53        | 34                   | no                     | no                           | AAATCCTCTGAAATTCACCGT                                                                                                           | TGGTTTGAAGTAAAGGACAAA         | 238                         |              |
|                     |                             | gGTGAAGGAAATGTTGGCGA        | 20                                 | 53,445,098        | 7 of 22         | +         | 45        | 0                    | 0           | 0        | 4           | 0.77        | 62                   | no                     | NA                           | GAGGTGGATGCTGCTGTATATG                                                                                                          | AATCTAACCCAAATCCTTGCCA        | 201                         |              |
|                     |                             | <b>GATTACCGGCAGTATCAGTG</b> | <b>3</b>                           | <b>19,304,761</b> | <b>2 of 18</b>  | +         | <b>50</b> | <b>1</b>             | <b>0</b>    | <b>0</b> | <b>25</b>   | <b>0.50</b> | <b>50</b>            | <b>no</b>              | <b>high</b>                  | <b>TAGCGCATATATCACAAACGGAC</b>                                                                                                  | <b>CCATCACCCAGTCACTCAGTTT</b> | <b>228</b>                  |              |
|                     |                             | GGAAAGTGGGGAATGCATACA       | 3                                  | 19,308,392        | 4 of 18         | +         | 50        | 0                    | 0           | 0        | 3           | 0.46        | 75                   | yes                    | moderate                     | GACAATTCAGATGAGTTGGCTG                                                                                                          | ATACCATCCAGTGATAATCGGC        | 274                         |              |
|                     |                             | <b>GGAGCGGATTCGCGAGCGG</b>  | <b>6</b>                           | <b>102,541</b>    | <b>1 of 5</b>   | -         | <b>70</b> | <b>0</b>             | <b>0</b>    | <b>0</b> | <b>0</b>    | <b>0.79</b> | <b>66</b>            | <b>yes</b>             | <b>high</b>                  | <b>CCCTGGCCCTAACACTACAG</b>                                                                                                     | <b>ACCCGAAAGCAGCAGAAAC</b>    | <b>215</b>                  |              |
|                     |                             | gGCGCTGAGGAGTTCCGCTG        | 6                                  | 103,574           | 3 of 5          | +         | 65        | 1                    | 0           | 0        | 1           | 0.67        | 80                   | no                     | high                         | CGAGCAGAACTGCGGTAAT                                                                                                             | TGCACTGGAATGCTGTGG            | 249                         |              |
|                     |                             | gGGGCACACACTCTCCGCTG        | 6                                  | 103,852           | 3 of 5          | -         | 70        | 2                    | 0           | 0        | 2           | 0.68        | 78                   | no                     | no                           | GTGTCCACACACACACACAC                                                                                                            | gtACTCACTGCAGTTGCTCTG         | 271                         |              |
|                     |                             | GgTTCACGTTAGAGCTCTGA        | 6                                  | 102,589           | 1 of 5          | -         | 55        | 0                    | 0           | 0        | 0           | 0.52        | 61                   | no                     | no                           | TTCTGTCTCAGAGAGGGAATC                                                                                                           | GATCAGTGAACCTCACCGGTT         | 182                         |              |
| GgGGATTCGCGAGCGGTGG | 6                           | 102,538                     | 1 of 5                             | -                 | 70              | 0         | 0         | 1                    | 0           | 0.56     | 94          | no          | no                   | TAACATCACACCCTGCTGGAG  | GATCAGTGAACCTCACCGGTT        | 270                                                                                                                             |                               |                             |              |
| ldlra               | GGGAAGTCTGACTGTGAGAA        | 6                           | 103,441                            | 2 of 5            | +               | 50        | 2         | 0                    | 0           | 5        | 0.51        | 63          | yes                  | no                     | TGCTAATGACTCCTCTGCGT         | CACACACACAGCAGATCAC                                                                                                             | 216                           |                             |              |
|                     | GgTTCGGGTGAGTCTCAGCTG       | 6                           | 103,375                            | 2 of 5            | +               | 60        | 0         | 0                    | 0           | 2        | 0.66        | 70          | no                   | NA                     | AGACAGGGTGAACacacacacac      | agcagagtacacacacCTGAGAG                                                                                                         | 249                           |                             |              |
|                     | GgGGAACCTCATCCGCGCGC        | 6                           | 104,079                            | 4 of 5            | -               | 70        | 1         | 0                    | 0           | 0        | 0.49        | -           | no                   | NA                     | AGTGAGCAAGCGGACACTAAAT       | TGAGTGGCTGTGTGTTTAAAG                                                                                                           | 258                           |                             |              |
|                     | GGCACTGCATCTGCTGCTCC        | 6                           | 103,831                            | 3 of 5            | -               | 65        | 1         | 0                    | 0           | 8        | 0.47        | 47          | yes                  | NA                     | GGGTCAGACGAGTGGCTG           | GTACTCACTGCAGTTGCTCTCG                                                                                                          | 162                           |                             |              |
|                     | GgTTCCTCTGTCAGACGG          | 6                           | 104,093                            | 4 of 5            | +               | 60        | 1         | 0                    | 1           | 6        | 0.75        | -           | no                   | NA                     | AGTGAGCAAGCGGACACTAAAT       | TGAGTGGCTGTGTGTTTAAAG                                                                                                           | 258                           |                             |              |

CRISPR gRNA target sequences were preferably selected based on location (i.e. in an early exon that affects all transcripts), complementarity (i.e. no complementarity), and free from predicted off targets. Target activity was examined by micro-injections in eight fertilized eggs in multiplex, followed by fragment length PCR analysis at 3 days post-fertilization. Results from target efficiency testing are shown, where NA: Not available due to failed capillary electrophoresis while estimating the length of the targeted region of an exon; No: 8 of 8 larvae test-injected with the gRNA only showed wildtype sequences; Low: 8 of 8 larvae showed wildtype sequence and fewer than 4 of 8 also contained indel sequence; Moderate: 8 of 8 larvae showed wildtype sequence and >4 of 8 also contained indel sequence; High: 8 of 8 larvae showed wildtype as well as indel sequence; Very high: Fewer than 4 of 8 larvae showed wildtype sequence and all larvae showed indel sequence. Target sequences highlighted in bold were selected and used to generate multiplexed mutant zebrafish. Of note: after completion of the study a new version of the zebrafish genome was released. Data shown for gRNA target sequences are from the new version of the genome (built GRCz11).

Supplementary Table 13 - Unique CRISPR-Cas9-induced mutations for orthologues of proof-of-concept genes

| Zebrafish orthologue | Sequence                                                                                                                                                              | Annotation               | Number of alleles | mean ± SD number of reads |
|----------------------|-----------------------------------------------------------------------------------------------------------------------------------------------------------------------|--------------------------|-------------------|---------------------------|
| <i>apoA</i>          | ATGATGGAGCTGCAAAATGTACAGAGATGATCGCACTCCAAACTGGCCCTTACGCGCAGGAGAGGCCAGAAGTTCACGAAGATCTGCAGTTGTTGGTACCAAGCTCCGCACACA                                                    | 119M                     | 430               | 1079 ± 766                |
|                      | ATGATGGAGCTGCAAAATGTACAGAGATGATCGCACTCCAAACGGCAGGAGAGGCCAGAAGTTCACGAAGATCTGCAGTTGTTGGTACCAAGCTCCGCACACA                                                               | 41M11D67M                | 91                | 861 ± 515                 |
|                      | ATGATGGAGCTGCAAAATGTACAGAGATGATCGCACTCCAAACTGGCCCTTGGAGAGAGGCCAGAAGTTCACGAAGATCTGCAGTTGTTGGTACCAAGCTCCGCACACA                                                         | 51M9D60M                 | 67                | 873 ± 498                 |
|                      | ATGATGGAGCTGCAAAATGTACAGAGATGATCGCACTCCAAACTGGCCCTGGCAGGAGAGGCCAGAAGTTCACGAAGATCTGCAGTTGTTGGTACCAAGCTCCGCACACA                                                        | 48M5D66M                 | 50                | 726 ± 397                 |
|                      | ATGATGGAGCTGCAAAATGTACAGAGATGATCGCACTCCAAACGGCAGGAGAGGCCAGAAGTTCACGAAGATCTGCAGTTGTTGGTACCAAGCTCCGCACACA                                                               | 2M4S47M11D67M            | 30                | 735 ± 344                 |
|                      | ATGATGGAGCTGCAAAATGTACAGAGATGATCGCACTCCAAACTGGCCCTTCAAACGGCAGGAGAGGCCAGAAGTTCACGAAGATCTGCAGTTGTTGGTACCAAGCTCCGCACACA                                                  | 51M1S3167M               | 29                | 698 ± 293                 |
|                      | ATGATGGAGCTGCAAAATGTACAGAGATGATCGCACTCCAAACTGGCCCTGGCAGGAGAGGCCAGAAGTTCACGAAGATCTGCAGTTGTTGGTACCAAGCTCCGCACACA                                                        | 50M2S1M1S1M1S1I63M       | 15                | 782 ± 366                 |
|                      | ATGATGGAGCTGCAAAATGTACAGAGATGATCGCACTCCAAACTGGCCCTTCTCGCCGAGGAGAGGCCAGAAGTTCACGAAGATCTGCAGTTGTTGGTACCAAGCTCCGCACACA                                                   | 49M412M2S66M             | 14                | 636 ± 204                 |
|                      | ATGATGGAGCTGCAAAATGTACAGAGATGATCGCACTCCAAACTGGCCCTGGCAGGAGAGGCCAGAAGTTCACGAAGATCTGCAGTTGTTGGTACCAAGCTCCGCACACA                                                        | 48M9D62M                 | 12                | 577 ± 355                 |
|                      | ATGATGGAGCTGCAAAATGTACAGAGATGATCGCACTCCAAACTGGCCCTGGCAGGAGAGGCCAGAAGTTCACGAAGATCTGCAGTTGTTGGTACCAAGCTCCGCACACA                                                        | 51M2S1M1S64M             | 7                 | 824 ± 601                 |
|                      | ATGATGGAGCTGCAAAATGTACAGAGATGATCGCACTCCAAACTGGCAGGAGAGGCCAGAAGTTCACGAAGATCTGCAGTTGTTGGTACCAAGCTCCGCACACA                                                              | 45M11D63M                | 7                 | 695 ± 234                 |
|                      | ATGATGGAGCTGCAAAATGTACAGAGATGATCGCACTCCAAACTGGCCCTTGGAGGAGAGAGGCCAGAAGTTCACGAAGATCTGCAGTTGTTGGTACCAAGCTCCGCACACA                                                      | 52M4D1M1S61M             | 5                 | 862 ± 430                 |
|                      | ATGATGGAGCTGCAAAATGTACAGAGATGATCGCACTCCAAACTGGCCCTTCAAACGAAGATCTGCAGTTGTTGGTACCAAGCTCCGCACACA                                                                         | 35M2D2D62M               | 2                 | 828 ± 729                 |
|                      | ATGATGGAGCTGCAAAATGTACAGAGATGATCGCACTCCAAACTGGCCCTTGGTACGCGAGGAGAGGCCAGAAGTTCACGAAGATCTGCAGTTGTTGGTACCAAGCTCCGCACACA                                                  | 51M3I168M                | 2                 | 664 ± 109                 |
|                      | ATGATGGAGCTGCAAAATGTACAGAGATGATCGCACTCCAAACTGGCCCTGGCAGGAGAGGCCAGAAGTTCACGAAGATCTGCAGTTGTTGGTACCAAGCTCCGCACACA                                                        | 51M2D1D63M               | 2                 | 828 ± 729                 |
|                      | ATGATGGAGCTGCAAAATGTACAGAGATGATCGCACTCCAAACTGGCCCTGGCAGGAGAGGCCAGAAGTTCACGAAGATCTGCAGTTGTTGGTACCAAGCTCCGCACACA                                                        | 50M2D67M                 | 1                 | 552                       |
|                      | ATGATGGAGCTGCAAAATGTACAGAGATGATCGCACTCCAAACTGGCCCTGGCAGGAGAGGCCAGAAGTTCACGAAGATCTGCAGTTGTTGGTACCAAGCTCCGCACACA                                                        | 45M9D65M                 | 1                 | 21                        |
| <i>apoB</i>          | TTGTGATTAACCTAGTTTGGTATAAAGTTCACAGTCTCTTCTCACTCTTTGAGGCTGCCAGGCTCGTAGCCCTTGTGGCCCTCGATGCCCTCAGCCAGATGGGAGGAGATGGTGGACCGTTTCTGGCAGTATGTGTGAACCTCAACACACAACTGACGGCA     | 31M1S44M1I2M3S1M2S81M    | 157               | 664 ± 416                 |
|                      | TTGTGATTAACCTAGTTTGGTATAAAGTTCACAGTCTCTTCTCACTCTTTGAGGCTGCCAGGCTCGTAGCCCTGTCAAGTGCAGGCTGATGCCCTCAGCCAGATGGGAGGAGATGGTGGACCGTTTCTGGCAGTATGTGTGAACCTCAACACACAACTGACGGCA | 31M1S43M1S51I88M         | 116               | 683 ± 500                 |
|                      | TTGTGATTAACCTAGTTTGGTATAAAGTTCACAGTCTCTTCTCACTCTTTGAGGCTGCCAGGCTCGTAGCCCTGTCAAGTGCAGGCTGATGCCCTCAGCCAGATGGGAGGAGATGGTGGACCGTTTCTGGCAGTATGTGTGAACCTCAACACACAACTGACGGCA | 31M1S39M3S1M4D86M        | 100               | 708 ± 413                 |
|                      | TTGTGATTAACCTAGTTTGGTATAAAGTTCACAGTCTCTTCTCACTCTTTGAGGCTGCCAGGCTCGTAGCCCTGTCAAGTGCAGGCTGATGCCCTCAGCCAGATGGGAGGAGATGGTGGACCGTTTCTGGCAGTATGTGTGAACCTCAACACACAACTGACGGCA | 31M1S133M                | 91                | 677 ± 465                 |
|                      | TTGTGATTAACCTAGTTTGGTATAAAGTTCACAGTCTCTTCTCACTCTTTGAGGCTGCCAGGCTCGTAGCCCTGTCAAGTGCAGGCTGATGCCCTCAGCCAGATGGGAGGAGATGGTGGACCGTTTCTGGCAGTATGTGTGAACCTCAACACACAACTGACGGCA | 31M1S39M1D84M            | 75                | 619 ± 399                 |
|                      | TTGTGATTAACCTAGTTTGGTATAAAGTTCACAGTCTCTTCTCACTCTTTGAGGCTGCCAGGCTCGTAGCCCTGTCAAGTGCAGGCTGATGCCCTCAGCCAGATGGGAGGAGATGGTGGACCGTTTCTGGCAGTATGTGTGAACCTCAACACACAACTGACGGCA | 31M1S38M6D89M            | 46                | 455 ± 273                 |
|                      | TTGTGATTAACCTAGTTTGGTATAAAGTTCACAGTCTCTTCTCACTCTTTGAGGCTGCCAGGCTCGTAGCCCTGTCAAGTGCAGGCTGATGCCCTCAGCCAGATGGGAGGAGATGGTGGACCGTTTCTGGCAGTATGTGTGAACCTCAACACACAACTGACGGCA | 31M1S41M1D84M            | 45                | 476 ± 216                 |
|                      | TTGTGATTAACCTAGTTTGGTATAAAGTTCACAGTCTCTTCTCACTCTTTGAGGCTGCCAGGCTCGTAGCCCTGTCAAGTGCAGGCTGATGCCCTCAGCCAGATGGGAGGAGATGGTGGACCGTTTCTGGCAGTATGTGTGAACCTCAACACACAACTGACGGCA | 76M9I1S20M1S9M1S3M1S4M   | 31                | 47 ± 23                   |
|                      | TTGTGATTAACCTAGTTTGGTATAAAGTTCACAGTCTCTTCTCACTCTTTGAGGCTGCCAGGCTCGTAGCCCTGTCAAGTGCAGGCTGATGCCCTCAGCCAGATGGGAGGAGATGGTGGACCGTTTCTGGCAGTATGTGTGAACCTCAACACACAACTGACGGCA | 31M1S44M9I1S20M1S9M81S8M | 29                | 32 ± 19                   |
|                      | TTGTGATTAACCTAGTTTGGTATAAAGTTCACAGTCTCTTCTCACTCTTTGAGGCTGCCAGGCTCGTAGCCCTGTCAAGTGCAGGCTGATGCCCTCAGCCAGATGGGAGGAGATGGTGGACCGTTTCTGGCAGTATGTGTGAACCTCAACACACAACTGACGGCA | 31M1S43M1D80M            | 22                | 475 ± 380                 |
|                      | TTGTGATTAACCTAGTTTGGTATAAAGTTCACAGTCTCTTCTCACTCTTTGAGGCTGCCAGGCTCGTAGCCCTGTCAAGTGCAGGCTGATGCCCTCAGCCAGATGGGAGGAGATGGTGGACCGTTTCTGGCAGTATGTGTGAACCTCAACACACAACTGACGGCA | 31M1S41M5D5M1S13M1S67M   | 16                | 357 ± 294                 |
|                      | TTGTGATTAACCTAGTTTGGTATAAAGTTCACAGTCTCTTCTCACTCTTTGAGGCTGCCAGGCTCGTAGCCCTGTCAAGTGCAGGCTGATGCCCTCAGCCAGATGGGAGGAGATGGTGGACCGTTTCTGGCAGTATGTGTGAACCTCAACACACAACTGACGGCA | 31M1S40M1D80M            | 11                | 596 ± 291                 |
|                      | TTGTGATTAACCTAGTTTGGTATAAAGTTCACAGTCTCTTCTCACTCTTTGAGGCTGCCAGGCTCGTAGCCCTGTCAAGTGCAGGCTGATGCCCTCAGCCAGATGGGAGGAGATGGTGGACCGTTTCTGGCAGTATGTGTGAACCTCAACACACAACTGACGGCA | 75M7D4M1179M             | 9                 | 409 ± 219                 |
|                      | TTGTGATTAACCTAGTTTGGTATAAAGTTCACAGTCTCTTCTCACTCTTTGAGGCTGCCAGGCTCGTAGCCCTGTCAAGTGCAGGCTGATGCCCTCAGCCAGATGGGAGGAGATGGTGGACCGTTTCTGGCAGTATGTGTGAACCTCAACACACAACTGACGGCA | 31M1S38M6D7M2S1M179M     | 8                 | 660 ± 346                 |
|                      | TTGTGATTAACCTAGTTTGGTATAAAGTTCACAGTCTCTTCTCACTCTTTGAGGCTGCCAGGCTCGTAGCCCTGTCAAGTGCAGGCTGATGCCCTCAGCCAGATGGGAGGAGATGGTGGACCGTTTCTGGCAGTATGTGTGAACCTCAACACACAACTGACGGCA | 31M1S26M1D899M           | 8                 | 658 ± 158                 |
|                      | TTGTGATTAACCTAGTTTGGTATAAAGTTCACAGTCTCTTCTCACTCTTTGAGGCTGCCAGGCTCGTAGCCCTGTCAAGTGCAGGCTGATGCCCTCAGCCAGATGGGAGGAGATGGTGGACCGTTTCTGGCAGTATGTGTGAACCTCAACACACAACTGACGGCA | 69M17D79M                | 7                 | 576 ± 269                 |
|                      | TTGTGATTAACCTAGTTTGGTATAAAGTTCACAGTCTCTTCTCACTCTTTGAGGCTGCCAGGCTCGTAGCCCTGTCAAGTGCAGGCTGATGCCCTCAGCCAGATGGGAGGAGATGGTGGACCGTTTCTGGCAGTATGTGTGAACCTCAACACACAACTGACGGCA | 31M1S40M2D1S2M2S86M      | 6                 | 676 ± 435                 |
|                      | TTGTGATTAACCTAGTTTGGTATAAAGTTCACAGTCTCTTCTCACTCTTTGAGGCTGCCAGGCTCGTAGCCCTGTCAAGTGCAGGCTGATGCCCTCAGCCAGATGGGAGGAGATGGTGGACCGTTTCTGGCAGTATGTGTGAACCTCAACACACAACTGACGGCA | 31M1S65M1S62M1S4M        | 3                 | 213 ± 81                  |
|                      | TTGTGATTAACCTAGTTTGGTATAAAGTTCACAGTCTCTTCTCACTCTTTGAGGCTGCCAGGCTCGTAGCCCTGTCAAGTGCAGGCTGATGCCCTCAGCCAGATGGGAGGAGATGGTGGACCGTTTCTGGCAGTATGTGTGAACCTCAACACACAACTGACGGCA | 31M1S26M4D62M1S4M        | 3                 | 205 ± 157                 |
|                      | TTGTGATTAACCTAGTTTGGTATAAAGTTCACAGTCTCTTCTCACTCTTTGAGGCTGCCAGGCTCGTAGCCCTGTCAAGTGCAGGCTGATGCCCTCAGCCAGATGGGAGGAGATGGTGGACCGTTTCTGGCAGTATGTGTGAACCTCAACACACAACTGACGGCA | 76M9I1S20M1S9M81S8M      | 2                 | 27 ± 10                   |
|                      | TTGTGATTAACCTAGTTTGGTATAAAGTTCACAGTCTCTTCTCACTCTTTGAGGCTGCCAGGCTCGTAGCCCTGTCAAGTGCAGGCTGATGCCCTCAGCCAGATGGGAGGAGATGGTGGACCGTTTCTGGCAGTATGTGTGAACCTCAACACACAACTGACGGCA | 71M5D89M                 | 1                 | 2044                      |
|                      | TTGTGATTAACCTAGTTTGGTATAAAGTTCACAGTCTCTTCTCACTCTTTGAGGCTGCCAGGCTCGTAGCCCTGTCAAGTGCAGGCTGATGCCCTCAGCCAGATGGGAGGAGATGGTGGACCGTTTCTGGCAGTATGTGTGAACCTCAACACACAACTGACGGCA | 69M11D85M                | 1                 | 1032                      |
| <i>apoB</i>          | CCATGTTGGGTGAGCAGAGCTGTCAGCTAAGATGAACAGCAACTTTTGAATGGGAGGGCTCTATCTATCTGAATGGGAGGGCTCAACACACTGTTGATGTTCCCAATTACATTGCTAAGTACAAAATAATGGCCAGCTGCCCTTAA                    | 69M11I3S43M1S25M         | 122               | 666 ± 434                 |
|                      | CCATGTTGGGTGAGCAGAGCTGTCAGCTAAGATGAACAGCAACTTTTGAATGGGAGGGCTCTATCTATCTGAATGGGAGGGCTCAACACACTGTTGATGTTCCCAATTACATTGCTAAGTACAAAATAATGGCCAGCTGCCCTTAA                    | 58M15D42M1S25M           | 119               | 782 ± 474                 |
|                      | CCATGTTGGGTGAGCAGAGCTGTCAGCTAAGATGAACAGCAACTTTTGAATGGGAGGGCTCTATCTATCTGAATGGGAGGGCTCAACACACTGTTGATGTTCCCAATTACATTGCTAAGTACAAAATAATGGCCAGCTGCCCTTAA                    | 64M5D46M1S25M            | 91                | 742 ± 633                 |
|                      | CCATGTTGGGTGAGCAGAGCTGTCAGCTAAGATGAACAGCAACTTTTGAATGGGAGGGCTCAACACACTGTTGATGTTCCCAATTACATTGCTAAGTACAAAATAATGGCCAGCTGCCCTTAA                                           | 58M14D69M                | 90                | 655 ± 474                 |
|                      | CCATGTTGGGTGAGCAGAGCTGTCAGCTAAGATGAACAGCAACTTTTGAATGGGAGGGCTCTATCTATCTGAATGGGAGGGCTCAACACACTGTTGATGTTCCCAATTACATTGCTAAGTACAAAATAATGGCCAGCTGCCCTTAA                    | 69M4D1M1S40M1S25M        | 86                | 752 ± 426                 |
|                      | CCATGTTGGGTGAGCAGAGCTGTCAGCTAAGATGAACAGCAACTTTTGAATGGGAGGGCTCTATCTATCTGAATGGGAGGGCTCAACACACTGTTGATGTTCCCAATTACATTGCTAAGTACAAAATAATGGCCAGCTGCCCTTAA                    | 68M1D46M1S25M            | 76                | 758 ± 458                 |
|                      | CCATGTTGGGTGAGCAGAGCTGTCAGCTAAGATGAACAGCAACTTTTGAATGGGAGGGCTCTATCTATCTGAATGGGAGGGCTCAACACACTGTTGATGTTCCCAATTACATTGCTAAGTACAAAATAATGGCCAGCTGCCCTTAA                    | 64M5D10M3I36M1S25M       | 56                | 795 ± 540                 |
|                      | CCATGTTGGGTGAGCAGAGCTGTCAGCTAAGATGAACAGCAACTTTTGAATGGGAGGGCTCTATCTATCTGAATGGGAGGGCTCAACACACTGTTGATGTTCCCAATTACATTGCTAAGTACAAAATAATGGCCAGCTGCCCTTAA                    | 58M14D34M1S25M           | 29                | 588 ± 284                 |
|                      | CCATGTTGGGTGAGCAGAGCTGTCAGCTAAGATGAACAGCAACTTTTGAATGGGAGGGCTCTATCTATCTGAATGGGAGGGCTCAACACACTGTTGATGTTCCCAATTACATTGCTAAGTACAAAATAATGGCCAGCTGCCCTTAA                    | 69M8I2M1S2I69M           | 18                | 627 ± 372                 |
|                      | CCATGTTGGGTGAGCAGAGCTGTCAGCTAAGATGAACAGCAACTTTTGAATGGGAGGGCTCTATCTATCTGAATGGGAGGGCTCAACACACTGTTGATGTTCCCAATTACATTGCTAAGTACAAAATAATGGCCAGCTGCCCTTAA                    | 69M11D35M1S25M           | 16                | 805 ± 385                 |
|                      | CCATGTTGGGTGAGCAGAGCTGTCAGCTAAGATGAACAGCAACTTTTGAATGGGAGGGCTCTATCTATCTGAATGGGAGGGCTCAACACACTGTTGATGTTCCCAATTACATTGCTAAGTACAAAATAATGGCCAGCTGCCCTTAA                    | 69M1S8I45M1S25M          | 12                | 612 ± 275                 |
|                      | CCATGTTGGGTGAGCAGAGCTGTCAGCTAAGATGAACAGCAACTTTTGAATGGGAGGGCTCTATCTATCTGAATGGGAGGGCTCAACACACTGTTGATGTTCCCAATTACATTGCTAAGTACAAAATAATGGCCAGCTGCCCTTAA                    | 69M1146M1S25M            | 8                 | 641 ± 302                 |
|                      | CCATGTTGGGTGAGCAGAGCTGTCAGCTAAGATGAACAGCAACTTTTGAATGGGAGGGCTCTATCTATCTGAATGGGAGGGCTCAACACACTGTTGATGTTCCCAATTACATTGCTAAGTACAAAATAATGGCCAGCTGCCCTTAA                    | 58M15D68M                | 7                 | 380 ± 249                 |
|                      | CCATGTTGGGTGAGCAGAGCTGTCAGCTAAGATGAACAGCAACTTTTGAATGGGAGGGCTCTATCTATCTGAATGGGAGGGCTCAACACACTGTTGATGTTCCCAATTACATTGCTAAGTACAAAATAATGGCCAGCTGCCCTTAA                    | 67M17D57M                | 6                 | 698 ± 295                 |
|                      | CCATGTTGGGTGAGCAGAGCTGTCAGCTAAGATGAACAGCAACTTTTGAATGGGAGGGCTCTATCTATCTGAATGGGAGGGCTCAACACACTGTTGATGTTCCCAATTACATTGCTAAGTACAAAATAATGGCCAGCTGCCCTTAA                    | 68M14I1S1M1S70M          | 5                 | 497 ± 382                 |
|                      | CCATGTTGGGTGAGCAGAGCTGTCAGCTAAGATGAACAGCAACTTTTGAATGGGAGGGCTCTATCTATCTGAATGGGAGGGCTCAACACACTGTTGATGTTCCCAATTACATTGCTAAGTACAAAATAATGGCCAGCTGCCCTTAA                    | 69M7I46M1S25M            | 4                 | 666 ± 97                  |
|                      | CCATGTTGGGTGAGCAGAGCTGTCAGCTAAGATGAACAGCAACTTTTGAATGGGAGGGCTCTATCTATCTGAATGGGAGGGCTCAACACACTGTTGATGTTCCCAATTACATTGCTAAGTACAAAATAATGGCCAGCTGCCCTTAA                    | 69M9I1M1S44M1S25M        | 3                 | 590 ± 32                  |
|                      | CCATGTTGGGTGAGCAGAGCTGTCAGCTAAGATGAACAGCAACTTTTGAATGGGAGGGCTCTATCTATCTGAATGGGAGGGCTCAACACACTGTTGATGTTCCCAATTACATTGCTAAGTACAAAATAATGGCCAGCTGCCCTTAA                    | 69M9D37M1S25M            | 3                 | 517 ± 460                 |
|                      | CCATGTTGGGTGAGCAGAGCTGTCAGCTAAGATGAACAGCAACTTTTGAATGGGAGGGCTCAACACACTGTTGATGTTCCCAATTACATTGCTAAGTACAAAATAATGGCCAGCTGCCCTTAA                                           | 57M13D45M1S25M           | 2                 | 816 ± 240                 |
|                      | CCATGTTGGGTGAGCAGAGCTGTCAGCTAAGATGAACAGCAACTTTTGAATGGGAGGGCTCTATCTATCTGAATGGGAGGGCTCAACACACTGTTGATGTTCCCAATTACATTGCTAAGTACAAAATAATGGCCAGCTGCCCTTAA                    | 65M16D60M                | 2                 | 681 ± 57                  |
|                      | CCATGTTGGGTGAGCAGAGCTGTCAGCTAAGATGAACAGCAACTTTTGAATGGGAGGGCTCTATCTATCTGAATGGGAGGGCTCAACACACTGTTGATGTTCCCAATTACATTGCTAAGTACAAAATAATGGCCAGCTGCCCTTAA                    | 68M13I1M2S70M            | 1                 | 1120                      |



| Zebrafish orthologue | Chr        | Start      | End        | RefSeq                                    | Position | Variant                        | Impact   | n <sub>affected</sub> |
|----------------------|------------|------------|------------|-------------------------------------------|----------|--------------------------------|----------|-----------------------|
| <i>apoea</i>         | 19         | 10,856,052 | 10,856,073 | CTCCAAACTGGCCCTTACGCG/-                   | -22      | frameshift variant             | high     | 2                     |
|                      |            | 10,856,058 | 10,856,068 | ACTGGCCCTT/-                              | -11      | frameshift variant             | high     | 116                   |
|                      |            | 10,856,062 | 10,856,070 | GCCCTTAC/-                                | -9       | inframe deletion               | moderate | 1                     |
|                      |            | 10,856,062 | 10,856,072 | GCCCTTACGCG/-                             | -11      | frameshift variant             | high     | 7                     |
|                      |            | 10,856,064 | 10,856,069 | CCCTTA/-                                  | -6       | inframe deletion               | moderate | 1                     |
|                      |            | 10,856,065 | 10,856,069 | CCTTA/-                                   | -5       | frameshift variant             | high     | 49                    |
|                      |            | 10,856,065 | 10,856,073 | CCTTACGCG/-                               | -9       | inframe deletion               | moderate | 12                    |
|                      |            | 10,856,066 | 10,856,065 | -/CCCT                                    | 4        | frameshift variant             | high     | 14                    |
|                      |            | 10,856,067 | 10,856,068 | TT/AG                                     | 0        | missense variant               | moderate | 15                    |
|                      |            | 10,856,067 | 10,856,068 | TT/-                                      | -2       | frameshift variant             | high     | 1                     |
|                      |            | 10,856,068 | 10,856,067 | -/TGA                                     | 3        | stop gained,inframe insertion  | high     | 2                     |
|                      |            | 10,856,068 | 10,856,068 | T/C                                       | 0        | missense variant               | moderate | 29                    |
|                      |            | 10,856,068 | 10,856,069 | TA/GG                                     | 0        | missense variant               | moderate | 7                     |
|                      |            | 10,856,068 | 10,856,069 | TA/CT                                     | 0        | missense variant               | moderate | 14                    |
|                      |            | 10,856,068 | 10,856,075 | TACGCGCA/-                                | -8       | frameshift variant             | high     | 65                    |
|                      |            | 10,856,069 | 10,856,068 | -/CAA                                     | 3        | protein altering variant       | moderate | 29                    |
|                      |            | 10,856,069 | 10,856,072 | ACGC/-                                    | -4       | frameshift variant             | high     | 5                     |
|                      |            | 10,856,070 | 10,856,070 | C/G                                       | 0        | stop gained                    | high     | 15                    |
| 10,856,071           | 10,856,071 | G/C        | 0          | missense variant                          | moderate | 7                              |          |                       |
| 10,856,072           | 10,856,072 | C/A        | 0          | missense variant                          | moderate | 15                             |          |                       |
| 10,856,073           | 10,856,072 | -/G        | 1          | frameshift variant                        | high     | 15                             |          |                       |
| 10,856,074           | 10,856,074 | C/G        | 0          | missense variant                          | moderate | 5                              |          |                       |
| <i>apob</i>          | 16         | 23,961,533 | 23,961,550 | CCAGGCTCGTAGCCTGTT/-                      | -18      | inframe deletion               | moderate | 7                     |
|                      |            | 23,961,533 | 23,961,572 | CCAGGCTCGTAGCCTGTTCCAGGCTGATGCCCTCAGCCC/- | -40      | frameshift variant             | high     | 3                     |
|                      |            | 23,961,544 | 23,961,554 | GCCTGTCCAG/-                              | -11      | frameshift variant             | high     | 1                     |
|                      |            | 23,961,544 | 23,961,560 | GCCTGTCCAGGCTGAT/-                        | -17      | frameshift variant             | high     | 4                     |
|                      |            | 23,961,545 | 23,961,550 | CCTGTT/-                                  | -6       | inframe deletion               | moderate | 47                    |
|                      |            | 23,961,546 | 23,961,548 | CTG/TGA                                   | 0        | stop gained                    | high     | 58                    |
|                      |            | 23,961,546 | 23,961,550 | CTGTT/-                                   | -5       | frameshift variant             | high     | 1                     |
|                      |            | 23,961,546 | 23,961,555 | CTGTTCCAGG/-                              | -10      | frameshift variant             | high     | 45                    |
|                      |            | 23,961,547 | 23,961,548 | TG/-                                      | -2       | frameshift variant             | high     | 5                     |
|                      |            | 23,961,547 | 23,961,559 | TGTTCCAGGCTGA/-                           | -13      | frameshift variant             | high     | 8                     |
|                      |            | 23,961,548 | 23,961,552 | GTTCC/-                                   | -5       | frameshift variant             | high     | 11                    |
|                      |            | 23,961,549 | 23,961,549 | T/A                                       | 0        | missense variant               | moderate | 5                     |
|                      |            | 23,961,550 | 23,961,550 | T/C                                       | 0        | missense variant               | moderate | 68                    |
|                      |            | 23,961,550 | 23,961,553 | TCCA/-                                    | -4       | frameshift variant             | high     | 58                    |
|                      |            | 23,961,550 | 23,961,556 | TCCAGGC/-                                 | -7       | frameshift variant             | high     | 8                     |
|                      |            | 23,961,550 | 23,961,559 | TCCAGGCTGA/-                              | -10      | frameshift variant             | high     | 17                    |
|                      |            | 23,961,551 | 23,961,550 | -/AAGTG                                   | 5        | frameshift variant             | high     | 68                    |
|                      |            | 23,961,551 | 23,961,550 | -/ATATATATA                               | 9        | protein altering variant       | moderate | 62                    |
|                      |            | 23,961,551 | 23,961,550 | -/G                                       | 1        | frameshift variant             | high     | 97                    |
|                      |            | 23,961,551 | 23,961,551 | C/A                                       | 0        | missense variant               | moderate | 130                   |
|                      |            | 23,961,552 | 23,961,553 | CA/TG                                     | 0        | missense variant               | moderate | 5                     |
|                      |            | 23,961,553 | 23,961,555 | AGG/CCT                                   | 0        | missense variant               | moderate | 97                    |
|                      |            | 23,961,557 | 23,961,558 | TG/GT                                     | 0        | missense variant               | moderate | 97                    |
| 23,961,558           | 23,961,558 | G/A        | 0          | missense variant                          | moderate | 11                             |          |                       |
| 23,961,558           | 23,961,559 | GA/CG      | 0          | missense variant                          | moderate | 7                              |          |                       |
| 23,961,561           | 23,961,560 | -/A        | 1          | frameshift variant                        | high     | 15                             |          |                       |
| 23,961,572           | 23,961,572 | C/A        | 0          | synonymous variant                        | low      | 11                             |          |                       |
| <i>apoba</i>         | 17         | 30,717,993 | 30,718,005 | AGGGCTCTATCTT/-                           | -13      | frameshift variant             | high     | 2                     |
|                      |            | 30,717,994 | 30,718,007 | GGGCTCTATCTTAG/-                          | -14      | frameshift variant             | high     | 119                   |
|                      |            | 30,717,994 | 30,718,008 | GGGCTCTATCTTAGG/-                         | -15      | inframe deletion               | moderate | 103                   |
|                      |            | 30,718,000 | 30,718,004 | TATCT/-                                   | -5       | frameshift variant             | high     | 139                   |
|                      |            | 30,718,001 | 30,718,016 | ATCTTAGGGGCAACA/-                         | -16      | frameshift variant             | high     | 2                     |
|                      |            | 30,718,003 | 30,718,019 | CTTAGGGGCAACAACA/-                        | -17      | frameshift variant             | high     | 6                     |
|                      |            | 30,718,004 | 30,718,003 | -/AGCAACTTTTATGA                          | 14       | frameshift variant             | high     | 5                     |
|                      |            | 30,718,004 | 30,718,003 | -/TATCTTTTATGAA                           | 13       | stop gained,frameshift variant | high     | 1                     |
|                      |            | 30,718,004 | 30,718,004 | T/-                                       | -1       | frameshift variant             | high     | 68                    |
|                      |            | 30,718,004 | 30,718,004 | T/A                                       | 0        | missense variant               | moderate | 5                     |
|                      |            | 30,718,005 | 30,718,004 | -/ATCTATGAATG                             | 11       | stop gained,frameshift variant | high     | 103                   |
|                      |            | 30,718,005 | 30,718,004 | -/TCACAGC                                 | 7        | frameshift variant             | high     | 4                     |
|                      |            | 30,718,005 | 30,718,004 | -/GGGGGGCAA                               | 9        | protein altering variant       | moderate | 3                     |
|                      |            | 30,718,005 | 30,718,004 | -/CCCATTCA                                | 8        | frameshift variant             | high     | 18                    |
|                      |            | 30,718,005 | 30,718,004 | -/A                                       | 1        | frameshift variant             | high     | 8                     |
|                      |            | 30,718,005 | 30,718,005 | T/C                                       | 0        | missense variant               | moderate | 12                    |
|                      |            | 30,718,005 | 30,718,006 | TA/GG                                     | 0        | missense variant               | moderate | 1                     |
|                      |            | 30,718,005 | 30,718,007 | TAG/GGA                                   | 0        | missense variant               | moderate | 103                   |
|                      |            | 30,718,005 | 30,718,008 | TAGG/-                                    | -4       | frameshift variant             | high     | 70                    |
|                      |            | 30,718,005 | 30,718,013 | TAGGGGCA/-                                | -9       | inframe deletion               | moderate | 3                     |
|                      |            | 30,718,005 | 30,718,015 | TAGGGGGCAAC/-                             | -11      | frameshift variant             | high     | 16                    |
|                      |            | 30,718,006 | 30,718,005 | -/TATCTGGA                                | 8        | frameshift variant             | high     | 12                    |
|                      |            | 30,718,006 | 30,718,006 | A/G                                       | 0        | synonymous variant             | low      | 8                     |
| 30,718,007           | 30,718,007 | G/A        | 0          | missense variant                          | moderate | 18                             |          |                       |
| 30,718,008           | 30,718,007 | -/CT       | 2          | frameshift variant                        | high     | 18                             |          |                       |
| 30,718,010           | 30,718,010 | G/T        | 0          | missense variant                          | moderate | 70                             |          |                       |
| 30,718,015           | 30,718,014 | -/CAT      | 3          | inframe insertion                         | moderate | 48                             |          |                       |
| <i>apobb.1</i>       | 20         | 31,273,922 | 31,273,942 | TGACAAAGTACCAAGGGCAA/-                    | -21      | inframe deletion               | moderate | 1                     |
|                      |            | 31,273,923 | 31,273,936 | GACAAAGTACCAAG/-                          | -14      | frameshift variant             | high     | 2                     |
|                      |            | 31,273,927 | 31,273,933 | AAGTACC/-                                 | -7       | frameshift variant             | high     | 82                    |
|                      |            | 31,273,931 | 31,273,930 | -/ACAATG                                  | 6        | stop gained,inframe insertion  | high     | 1                     |
|                      |            | 31,273,932 | 31,273,931 | -/ATG                                     | 3        | inframe insertion              | moderate | 6                     |
|                      |            | 31,273,932 | 31,273,933 | CC/TT                                     | 0        | missense variant               | moderate | 6                     |

| Zebrafish orthologue | Chr | Start      | End        | Mutation                                                                     | Impact | n <sub>affected</sub> alleles                                  |          |     |
|----------------------|-----|------------|------------|------------------------------------------------------------------------------|--------|----------------------------------------------------------------|----------|-----|
| <i>apobb.1</i>       | 20  | 31,273,932 | 31,273,933 | CC/-                                                                         | -2     | frameshift variant                                             | high     | 24  |
|                      |     | 31,273,933 | 31,273,933 | C/A                                                                          | 0      | missense variant                                               | moderate | 94  |
|                      |     | 31,273,934 | 31,273,933 | -/T                                                                          | 1      | frameshift variant                                             | high     | 11  |
|                      |     | 31,273,935 | 31,273,935 | A/T                                                                          | 0      | missense variant                                               | moderate | 93  |
|                      |     | 31,273,937 | 31,273,936 | -/ACATTATGCA                                                                 | 10     | frameshift variant                                             | high     | 91  |
|                      |     | 31,273,938 | 31,273,938 | G/A                                                                          | 0      | missense variant                                               | moderate | 91  |
| <i>apobb.2</i>       | 20  | 53,444,321 | 53,444,327 | TTCCAGA/-                                                                    | -7     | splice acceptor variant,coding sequence variant,intron variant | high     | 2   |
|                      |     | 53,444,328 | 53,444,338 | GCCATCCTCTT/-                                                                | -11    | frameshift variant,splice region variant                       | high     | 3   |
|                      |     | 53,444,330 | 53,444,334 | CATCC/AGATA                                                                  | 0      | missense variant                                               | moderate | 2   |
|                      |     | 53,444,331 | 53,444,346 | ATCCTCTTGCTCAGCT/-                                                           | -16    | frameshift variant                                             | high     | 12  |
|                      |     | 53,444,332 | 53,444,334 | TCC/-                                                                        | -3     | inframe deletion                                               | moderate | 307 |
|                      |     | 53,444,332 | 53,444,340 | TCCTCTTGC/-                                                                  | -9     | inframe deletion                                               | moderate | 33  |
|                      |     | 53,444,334 | 53,444,333 | -/AGAGCATCCAG                                                                | 11     | frameshift variant                                             | high     | 3   |
|                      |     | 53,444,334 | 53,444,333 | -/T                                                                          | 1      | frameshift variant                                             | high     | 8   |
|                      |     | 53,444,334 | 53,444,334 | C/T                                                                          | 0      | missense variant                                               | moderate | 8   |
|                      |     | 53,444,334 | 53,444,335 | CT/AG                                                                        | 0      | missense variant                                               | moderate | 4   |
|                      |     | 53,444,334 | 53,444,335 | CT/-                                                                         | -2     | frameshift variant                                             | high     | 51  |
|                      |     | 53,444,335 | 53,444,341 | TCTTGCT/AGACAAC                                                              | 0      | missense variant                                               | moderate | 9   |
|                      |     | 53,444,336 | 53,444,335 | -/GGAAA                                                                      | 5      | frameshift variant                                             | high     | 4   |
|                      |     | 53,444,336 | 53,444,335 | -/TGCTTAGCTTGCTCAG                                                           | 16     | frameshift variant                                             | high     | 13  |
|                      |     | 53,444,336 | 53,444,337 | CT/TA                                                                        | 0      | missense variant                                               | moderate | 2   |
|                      |     | 53,444,336 | 53,444,338 | CTT/TAA                                                                      | 0      | stop gained                                                    | high     | 4   |
|                      |     | 53,444,345 | 53,444,346 | CT/AC                                                                        | 0      | missense variant                                               | moderate | 9   |
|                      |     | 53,444,349 | 53,444,349 | T/C                                                                          | 0      | missense variant                                               | moderate | 9   |
| <i>ldra</i>          | 3   | 19,304,770 | 19,304,775 | CAGTAT/-                                                                     | -6     | inframe deletion                                               | moderate | 22  |
|                      |     | 19,304,772 | 19,304,772 | G/C                                                                          | 0      | missense variant                                               | moderate | 97  |
|                      |     | 19,304,772 | 19,304,779 | GTATCAGT/-                                                                   | -8     | frameshift variant                                             | high     | 63  |
|                      |     | 19,304,774 | 19,304,773 | -/GATTCAC                                                                    | 7      | stop gained,frameshift variant                                 | high     | 7   |
|                      |     | 19,304,774 | 19,304,775 | AT/GG                                                                        | 0      | missense variant                                               | moderate | 7   |
|                      |     | 19,304,775 | 19,304,775 | T/C                                                                          | 0      | synonymous variant                                             | low      | 97  |
|                      |     | 19,304,775 | 19,304,780 | TCAGTG/-                                                                     | -6     | inframe deletion                                               | moderate | 1   |
|                      |     | 19,304,776 | 19,304,775 | -/AG                                                                         | 2      | frameshift variant                                             | high     | 97  |
|                      |     | 19,304,776 | 19,304,776 | C/T                                                                          | 0      | stop gained                                                    | high     | 97  |
|                      |     | 19,304,777 | 19,304,776 | -/A                                                                          | 1      | frameshift variant                                             | high     | 39  |
|                      |     | 19,304,778 | 19,304,778 | G/-                                                                          | -1     | frameshift variant                                             | high     | 73  |
|                      |     | 19,304,778 | 19,304,778 | G/A                                                                          | 0      | synonymous variant                                             | low      | 2   |
|                      |     | 19,304,780 | 19,304,779 | -/GGAAA                                                                      | 5      | frameshift variant                                             | high     | 2   |
|                      |     | 19,304,790 | 19,304,789 | -/A                                                                          | 1      | frameshift variant                                             | high     | 1   |
| <i>ldrb</i>          | 6   | 102,538    | 102,546    | CCGCCACCG/-                                                                  | -9     | upstream gene variant                                          | modifier | 7   |
|                      |     | 102,543    | 102,543    | A/T                                                                          | 0      | upstream gene variant                                          | modifier | 1   |
|                      |     | 102,543    | 102,543    | A/-                                                                          | -1     | upstream gene variant                                          | modifier | 7   |
|                      |     | 102,544    | 102,544    | C/T                                                                          | 0      | upstream gene variant                                          | modifier | 7   |
|                      |     | 102,544    | 102,546    | CCG/-                                                                        | -3     | upstream gene variant                                          | modifier | 75  |
|                      |     | 102,544    | 102,550    | CCGCTCG/-                                                                    | -7     | upstream gene variant                                          | modifier | 15  |
|                      |     | 102,544    | 102,556    | CCGCTCGCAGAAT/-                                                              | -13    | upstream gene variant                                          | modifier | 7   |
|                      |     | 102,545    | 102,544    | -/A                                                                          | 1      | upstream gene variant                                          | modifier | 120 |
|                      |     | 102,545    | 102,546    | CG/-                                                                         | -2     | upstream gene variant                                          | modifier | 3   |
|                      |     | 102,545    | 102,546    | CG/TT                                                                        | 0      | upstream gene variant                                          | modifier | 120 |
|                      |     | 102,545    | 102,548    | CGCT/-                                                                       | -4     | upstream gene variant                                          | modifier | 140 |
|                      |     | 102,546    | 102,546    | G/T                                                                          | 0      | upstream gene variant                                          | modifier | 7   |
|                      |     | 102,546    | 102,612    | GCTCGCAGAATCCGCTCCCGGTA<br>CAGAACAGCATCTCTATCCGCC<br>TCAGAGCTCTAACGTGACGCT/- | -67    | upstream gene variant                                          | modifier | 5   |
|                      |     | 102,547    | 102,546    | -/AAGAATCGCAGAATCCGAGA                                                       | 20     | upstream gene variant                                          | modifier | 9   |
|                      |     | 102,547    | 102,546    | -/CAGGGAGAATCTCT                                                             | 14     | upstream gene variant                                          | modifier | 9   |
|                      |     | 102,547    | 102,547    | C/A                                                                          | 0      | upstream gene variant                                          | modifier | 9   |
|                      |     | 102,548    | 102,547    | -/CA                                                                         | 2      | upstream gene variant                                          | modifier | 40  |
|                      |     | 102,548    | 102,547    | -/ATTCTGT                                                                    | 7      | upstream gene variant                                          | modifier | 1   |

VEP: Ensembl's variant effect predictor; n<sub>affected</sub> alleles: the number of alleles across the 384 sequenced larvae in which the variant was observed (possible range 0 to 768)

**Supplementary Table 15 - Sequencing results expressed in number of mutated alleles for proof-of-concept genes**

| Zebrafish orthologue | Number of affected alleles |     |     | Missing genotypes | Total | Non-missing | Mutant allele freq | $P_{\text{HWE\_LR}}$ |
|----------------------|----------------------------|-----|-----|-------------------|-------|-------------|--------------------|----------------------|
|                      | 0                          | 1   | 2   |                   |       |             |                    |                      |
| <i>apoec</i>         | 112                        | 202 | 66  | 1                 | 381   | 380         | 0.439              | 1.45E-01             |
| <i>apoeb</i>         | 37                         | 11  | 315 | 18                | 381   | 363         | 0.883              | 2.53E-35             |
| <i>apoba</i>         | 0                          | 0   | 377 | 4                 | 381   | 377         | 1.000              | -                    |
| <i>apobb.1</i>       | 149                        | 166 | 34  | 32                | 381   | 349         | 0.335              | 1.89E-01             |
| <i>apobb.2</i>       | 0                          | 22  | 332 | 27                | 381   | 354         | 0.969              | -                    |
| <i>ldra</i>          | 120                        | 63  | 197 | 1                 | 381   | 380         | 0.601              | 8.60E-40             |
| <i>ldrb</i>          | 1                          | 0   | 327 | 25                | 353   | 328         | 0.997              | -                    |

The number of affected alleles located in a  $\pm 30$  base pair window around the CRISPR cut site, without taking into account the variants' probability of affecting protein function.  $P_{\text{HWE\_LR}}$ :  $P$ -value for a Hardy-Weinberg equilibrium (HWE) likelihood-ratio chi-squared statistic ( $P < 2.9\text{E-}3$  is significant after Bonferroni correction). For both *apoeb* and *ldra*, there were more larvae carrying two mutated alleles than expected under HWE.

|                |                                  | Body length (n=339) |       |          |        |       |
|----------------|----------------------------------|---------------------|-------|----------|--------|-------|
|                |                                  | Effect              | SE    | P        | lci    | uci   |
| fixed factors  | genetic burden score             | -0.047              | 0.028 | 9.33E-02 | -0.103 | 0.008 |
|                | <i>apoba</i>                     | 0.022               | 0.231 | 9.24E-01 | -0.431 | 0.475 |
|                | <i>apobb.2</i>                   | 0.455               | 0.167 | 6.58E-03 | 0.127  | 0.783 |
|                | <i>ldlr</i>                      | 2.135               | 1.852 | 2.49E-01 | -1.495 | 5.766 |
|                | time of day (in hours since 9AM) | -0.022              | 0.037 | 5.54E-01 | -0.095 | 0.051 |
|                | intercept                        | -1.439              | 0.914 | 1.15E-01 | -3.230 | 0.351 |
| random factors | <i>variance by batch</i>         | 0.469               | 0.129 | -        | 0.274  | 0.804 |
|                | <i>residual</i>                  | 0.724               | 0.028 | -        | 0.671  | 0.781 |

  

|                |                                  | Dorsal body surface area (n=339) |       |          |        |        |
|----------------|----------------------------------|----------------------------------|-------|----------|--------|--------|
|                |                                  | Effect                           | SE    | P        | lci    | uci    |
| fixed factors  | genetic burden score             | 0.001                            | 0.033 | 9.76E-01 | -0.063 | 0.065  |
|                | <i>apoba</i>                     | 0.165                            | 0.267 | 5.36E-01 | -0.358 | 0.689  |
|                | <i>apobb.2</i>                   | -0.459                           | 0.194 | 1.78E-02 | -0.838 | -0.079 |
|                | <i>ldlr</i>                      | -2.781                           | 2.142 | 1.94E-01 | -6.979 | 1.417  |
|                | time of day (in hours since 9AM) | 0.028                            | 0.043 | 5.21E-01 | -0.057 | 0.112  |
|                | intercept                        | 1.335                            | 1.054 | 2.05E-01 | -0.731 | 3.400  |
| random factors | <i>variance by batch</i>         | 0.503                            | 0.140 | -        | 0.291  | 0.868  |
|                | <i>residual</i>                  | 0.837                            | 0.033 | -        | 0.776  | 0.904  |

  

|                |                                  | Lateral body surface area (n=335) |       |          |        |       |
|----------------|----------------------------------|-----------------------------------|-------|----------|--------|-------|
|                |                                  | Effect                            | SE    | P        | lci    | uci   |
| fixed factors  | genetic burden score             | 0.005                             | 0.034 | 8.79E-01 | -0.061 | 0.071 |
|                | <i>apoba</i>                     | 0.153                             | 0.276 | 5.79E-01 | -0.387 | 0.693 |
|                | <i>apobb.2</i>                   | -0.221                            | 0.198 | 2.63E-01 | -0.609 | 0.166 |
|                | <i>ldlr</i>                      | -2.306                            | 2.189 | 2.92E-01 | -6.595 | 1.983 |
|                | time of day (in hours since 9AM) | 0.020                             | 0.044 | 6.52E-01 | -0.066 | 0.106 |
|                | intercept                        | 0.814                             | 1.078 | 4.50E-01 | -1.299 | 2.927 |
| random factors | <i>variance by batch</i>         | 0.483                             | 0.135 | -        | 0.279  | 0.835 |
|                | <i>residual</i>                  | 0.854                             | 0.033 | -        | 0.791  | 0.922 |

  

|                |                                  | Body volume (n=328) |       |          |        |       |
|----------------|----------------------------------|---------------------|-------|----------|--------|-------|
|                |                                  | Effect              | SE    | P        | lci    | uci   |
| fixed factors  | genetic burden score             | 0.009               | 0.033 | 7.93E-01 | -0.056 | 0.074 |
|                | <i>apoba</i>                     | 0.152               | 0.270 | 5.75E-01 | -0.378 | 0.682 |
|                | <i>apobb.2</i>                   | -0.309              | 0.196 | 1.15E-01 | -0.694 | 0.075 |
|                | <i>ldlr</i>                      | -2.617              | 2.141 | 2.21E-01 | -6.814 | 1.579 |
|                | time of day (in hours since 9AM) | 0.041               | 0.044 | 3.46E-01 | -0.045 | 0.128 |
|                | intercept                        | 1.000               | 1.060 | 3.46E-01 | -1.078 | 3.078 |
| random factors | <i>variance by batch</i>         | 0.494               | 0.137 | -        | 0.287  | 0.851 |
|                | <i>residual</i>                  | 0.834               | 0.033 | -        | 0.772  | 0.902 |

A genetic burden score was calculated by summing the dosage scores for *apoea*, *apoeb*, *apobb.1* and *ldlra*. Dorsal and lateral body surface area and body volume were normalized for body length using residuals. All outcomes were inverse-normally transformed before the analysis. Associations were examined using hierarchical linear models and were adjusted for mutations in *apoba*, *apobb.2* and *ldlr*, time of day and batch. Effects shown for the genetic burden score are for each additional mutated allele. Lci and uci are lower and upper boundaries of the 95% confidence interval.

**Supplementary Table 17: The effect of a genetic burden score on whole-body lipid and glucose levels**

|                |                                  | LDL cholesterol levels (n=381) |       |          |        |       |
|----------------|----------------------------------|--------------------------------|-------|----------|--------|-------|
|                |                                  | Effect                         | SE    | P        | lci    | uci   |
| fixed factors  | genetic burden score             | 0.052                          | 0.035 | 1.35E-01 | -0.016 | 0.120 |
|                | <i>apoba</i>                     | 0.019                          | 0.290 | 9.47E-01 | -0.549 | 0.588 |
|                | <i>apobb.2</i>                   | 0.302                          | 0.211 | 1.52E-01 | -0.111 | 0.715 |
|                | <i>ldlr</i>                      | -3.424                         | 2.424 | 1.58E-01 | -8.175 | 1.327 |
|                | time of day (in hours since 9AM) | 0.055                          | 0.043 | 1.97E-01 | -0.029 | 0.139 |
|                | intercept                        | 0.595                          | 1.167 | 6.10E-01 | -1.693 | 2.883 |
| random factors | <i>variance by batch</i>         | 0.355                          | 0.123 | -        | 0.181  | 0.699 |
|                | <i>residual</i>                  | 0.951                          | 0.035 | -        | 0.885  | 1.022 |

  

|                |                                  | HDL cholesterol levels (n=381) |       |          |        |       |
|----------------|----------------------------------|--------------------------------|-------|----------|--------|-------|
|                |                                  | Effect                         | SE    | P        | lci    | uci   |
| fixed factors  | genetic burden score             | 0.067                          | 0.032 | 3.40E-02 | 0.005  | 0.129 |
|                | <i>apoba</i>                     | 0.050                          | 0.263 | 8.49E-01 | -0.465 | 0.565 |
|                | <i>apobb.2</i>                   | 0.312                          | 0.190 | 1.01E-01 | -0.061 | 0.685 |
|                | <i>ldlr</i>                      | 0.841                          | 2.192 | 7.01E-01 | -3.455 | 5.136 |
|                | time of day (in hours since 9AM) | -0.028                         | 0.040 | 4.77E-01 | -0.107 | 0.050 |
|                | intercept                        | -1.071                         | 1.070 | 3.17E-01 | -3.168 | 1.027 |
| random factors | <i>variance by batch</i>         | 0.589                          | 0.159 | -        | 0.346  | 1.001 |
|                | <i>residual</i>                  | 0.857                          | 0.031 | -        | 0.798  | 0.921 |

  

|                |                                  | Triglyceride levels (n=381) |       |          |        |        |
|----------------|----------------------------------|-----------------------------|-------|----------|--------|--------|
|                |                                  | Effect                      | SE    | P        | lci    | uci    |
| fixed factors  | genetic burden score             | 0.014                       | 0.025 | 5.72E-01 | -0.035 | 0.064  |
|                | <i>apoba</i>                     | -0.098                      | 0.210 | 6.43E-01 | -0.510 | 0.315  |
|                | <i>apobb.2</i>                   | -0.326                      | 0.152 | 3.25E-02 | -0.625 | -0.027 |
|                | <i>ldlr</i>                      | -0.351                      | 1.754 | 8.41E-01 | -3.790 | 3.088  |
|                | time of day (in hours since 9AM) | -0.146                      | 0.032 | 5.92E-06 | -0.210 | -0.083 |
|                | intercept                        | 0.987                       | 0.885 | 2.64E-01 | -0.747 | 2.721  |
| random factors | <i>variance by batch</i>         | 0.781                       | 0.200 | -        | 0.473  | 1.290  |
|                | <i>residual</i>                  | 0.686                       | 0.025 | -        | 0.638  | 0.737  |

  

|                |                                  | Total cholesterol levels (n=381) |       |          |        |       |
|----------------|----------------------------------|----------------------------------|-------|----------|--------|-------|
|                |                                  | Effect                           | SE    | P        | lci    | uci   |
| fixed factors  | genetic burden score             | -0.031                           | 0.030 | 3.01E-01 | -0.091 | 0.028 |
|                | <i>apoba</i>                     | 0.165                            | 0.252 | 5.13E-01 | -0.329 | 0.659 |
|                | <i>apobb.2</i>                   | -0.064                           | 0.183 | 7.28E-01 | -0.422 | 0.294 |
|                | <i>ldlr</i>                      | -0.850                           | 2.102 | 6.86E-01 | -4.970 | 3.269 |
|                | time of day (in hours since 9AM) | 0.083                            | 0.039 | 3.24E-02 | 0.007  | 0.158 |
|                | intercept                        | 0.109                            | 1.042 | 9.17E-01 | -1.933 | 2.150 |
| random factors | <i>variance by batch</i>         | 0.754                            | 0.199 | -        | 0.449  | 1.267 |
|                | <i>residual</i>                  | 0.822                            | 0.030 | -        | 0.765  | 0.883 |



**continued Supplementary Table 17**

|                       |                                         | <b>Glucose levels (n=381)</b> |           |          |            |            |
|-----------------------|-----------------------------------------|-------------------------------|-----------|----------|------------|------------|
|                       |                                         | <b>Effect</b>                 | <b>SE</b> | <b>P</b> | <b>lci</b> | <b>uci</b> |
| <b>fixed factors</b>  | <b>genetic burden score</b>             | -0.047                        | 0.035     | 1.74E-01 | -0.116     | 0.021      |
|                       | <i>apoba</i>                            | -0.080                        | 0.290     | 7.82E-01 | -0.649     | 0.489      |
|                       | <i>apobb.2</i>                          | -0.364                        | 0.211     | 8.44E-02 | -0.777     | 0.049      |
|                       | <i>ldlrb</i>                            | -1.790                        | 2.424     | 4.60E-01 | -6.542     | 2.961      |
|                       | <b>time of day (in hours since 9AM)</b> | 0.044                         | 0.043     | 3.06E-01 | -0.040     | 0.129      |
|                       | <b>intercept</b>                        | 1.458                         | 1.169     | 2.12E-01 | -0.833     | 3.748      |
| <b>random factors</b> | <i>variance by batch</i>                | 0.380                         | 0.120     | -        | 0.204      | 0.706      |
|                       | <i>residual</i>                         | 0.951                         | 0.035     |          | 0.885      | 1.022      |

A genetic burden score was calculated by summing the dosage scores for *apoea*, *apoeb*, *apobb.1* and *ldlra*. Dorsal and lateral body surface area and body volume were normalized for body length using residuals. All outcomes were inverse-normally transformed before the analysis. Associations were examined using hierarchical linear models and were adjusted for mutations in *apoba*, *apobb.2* and *ldlrb*, time of day and batch. Effects shown for the genetic burden score are for each additional mutated allele. Lci and uci are lower and upper boundaries of the 95% confidence interval.

Supplementary Table 18 - The effect of a genetic burden score on vascular atherogenic traits

|                         |                                  | Vascular lipid deposition |          |          |        |        |                 |          |          |        |        |                 |          |          |        |        |
|-------------------------|----------------------------------|---------------------------|----------|----------|--------|--------|-----------------|----------|----------|--------|--------|-----------------|----------|----------|--------|--------|
|                         |                                  | Model 1 (n=306)           |          |          |        |        | Model 2 (n=272) |          |          |        |        | Model 3 (n=272) |          |          |        |        |
|                         |                                  | Effect                    | SE       | P        | lci    | uci    | Effect          | SE       | P        | lci    | uci    | Effect          | SE       | P        | lci    | uci    |
| negative binomial terms | genetic burden score             | 0.233                     | 0.064    | 2.81E-04 | 0.107  | 0.359  | 0.202           | 0.073    | 5.81E-03 | 0.059  | 0.346  | 0.176           | 0.077    | 2.29E-02 | 0.024  | 0.327  |
|                         | <i>apoba</i>                     | -0.075                    | 0.556    | 8.93E-01 | -1.165 | 1.016  | -0.147          | 0.572    | 7.98E-01 | -1.267 | 0.974  | 0.187           | 0.549    | 7.34E-01 | -0.890 | 1.263  |
|                         | <i>apobb.2</i>                   | -0.693                    | 0.506    | 1.70E-01 | -1.684 | 0.297  | -0.666          | 0.471    | 1.57E-01 | -1.589 | 0.257  | -0.371          | 0.418    | 3.75E-01 | -1.191 | 0.448  |
|                         | <i>ldlr</i>                      | 18.109                    | 3.317    | 4.76E-08 | 11.608 | 24.609 | 19.711          | 3.363    | 4.61E-09 | 13.119 | 26.303 | 18.757          | 3.209    | 5.08E-09 | 12.466 | 25.047 |
|                         | time of day (in hours since 9AM) | -0.118                    | 0.094    | 2.08E-01 | -0.302 | 0.066  | -0.198          | 0.107    | 6.37E-02 | -0.408 | 0.011  | -0.163          | 0.110    | 1.38E-01 | -0.379 | 0.052  |
|                         | body length (in SD)              | -                         | -        | -        | -      | -      | -0.285          | 0.144    | 4.72E-02 | -0.567 | -0.004 | -0.207          | 0.153    | 1.77E-01 | -0.508 | 0.094  |
|                         | dorsal body surface area (in SD) | -                         | -        | -        | -      | -      | 0.150           | 0.129    | 2.43E-01 | -0.102 | 0.403  | 0.183           | 0.130    | 1.58E-01 | -0.071 | 0.438  |
|                         | LDL cholesterol levels (in SD)   | -                         | -        | -        | -      | -      | -               | -        | -        | -      | -      | -0.088          | 0.092    | 3.38E-01 | -0.270 | 0.093  |
|                         | HDL cholesterol levels (in SD)   | -                         | -        | -        | -      | -      | -               | -        | -        | -      | -      | -0.035          | 0.129    | 7.87E-01 | -0.287 | 0.218  |
|                         | triglyceride levels (in SD)      | -                         | -        | -        | -      | -      | -               | -        | -        | -      | -      | 0.318           | 0.182    | 8.06E-02 | -0.039 | 0.674  |
|                         | glucose levels (in SD)           | -                         | -        | -        | -      | -      | -               | -        | -        | -      | -      | -0.120          | 0.107    | 2.60E-01 | -0.330 | 0.089  |
|                         | batch 1                          | 2.442                     | 0.485    | 4.84E-07 | 1.491  | 3.394  | 2.791           | 0.557    | 5.35E-07 | 1.700  | 3.882  | 2.808           | 0.611    | 4.29E-06 | 1.611  | 4.005  |
|                         | batch 2                          | 0.979                     | 0.560    | 8.05E-02 | -0.119 | 2.076  | 1.060           | 0.596    | 7.52E-02 | -0.108 | 2.227  | 1.363           | 0.692    | 4.90E-02 | 0.006  | 2.719  |
|                         | batch 3                          | 1.114                     | 0.510    | 2.89E-02 | 0.115  | 2.113  | 1.411           | 0.553    | 1.07E-02 | 0.327  | 2.495  | 1.363           | 0.568    | 1.64E-02 | 0.250  | 2.476  |
|                         | batch 4                          | 1.555                     | 0.585    | 7.87E-03 | 0.408  | 2.702  | 1.548           | 0.583    | 7.97E-03 | 0.404  | 2.691  | 1.627           | 0.584    | 5.32E-03 | 0.483  | 2.771  |
|                         | batch 5                          | 2.749                     | 0.595    | 3.76E-06 | 1.584  | 3.915  | 2.987           | 0.648    | 4.01E-06 | 1.718  | 4.257  | 2.541           | 0.703    | 3.01E-04 | 1.163  | 3.919  |
|                         | batch 6                          | 2.541                     | 0.509    | 5.95E-07 | 1.543  | 3.538  | 3.058           | 0.609    | 5.12E-07 | 1.864  | 4.251  | 2.488           | 0.654    | 1.42E-04 | 1.206  | 3.769  |
| batch 7                 | 1.695                            | 0.564                     | 2.64E-03 | 0.590    | 2.799  | 2.100  | 0.689           | 2.30E-03 | 0.750    | 3.450  | 1.791  | 0.697           | 1.02E-02 | 0.425    | 3.157  |        |
| intercept               | -3.897                           | 1.815                     | 3.18E-02 | -7.454   | -0.339 | -4.338 | 1.729           | 1.21E-02 | -7.728   | -0.949 | -4.795 | 1.685           | 4.44E-03 | -8.098   | -1.492 |        |

  

|                 |                                  | Vascular infiltration by macrophages |       |          |        |        |                 |       |          |        |        |                 |       |          |        |        |
|-----------------|----------------------------------|--------------------------------------|-------|----------|--------|--------|-----------------|-------|----------|--------|--------|-----------------|-------|----------|--------|--------|
|                 |                                  | Model 1 (n=368)                      |       |          |        |        | Model 2 (n=328) |       |          |        |        | Model 3 (n=328) |       |          |        |        |
|                 |                                  | Effect                               | SE    | P        | lci    | uci    | Effect          | SE    | P        | lci    | uci    | Effect          | SE    | P        | lci    | uci    |
| fixed factors   | genetic burden score             | -0.076                               | 0.032 | 1.76E-02 | -0.139 | -0.013 | -0.087          | 0.035 | 1.22E-02 | -0.155 | -0.019 | -0.099          | 0.035 | 5.04E-03 | -0.168 | -0.030 |
|                 | <i>apoba</i>                     | -0.115                               | 0.267 | 6.68E-01 | -0.639 | 0.409  | -0.089          | 0.284 | 7.54E-01 | -0.645 | 0.467  | -0.101          | 0.283 | 7.20E-01 | -0.655 | 0.453  |
|                 | <i>apobb.2</i>                   | -0.264                               | 0.194 | 1.73E-01 | -0.645 | 0.116  | -0.371          | 0.210 | 7.71E-02 | -0.782 | 0.040  | -0.427          | 0.212 | 4.38E-02 | -0.842 | -0.012 |
|                 | <i>ldlr</i>                      | -0.253                               | 2.213 | 9.09E-01 | -4.591 | 4.085  | -0.537          | 2.267 | 8.13E-01 | -4.980 | 3.906  | -0.522          | 2.266 | 8.18E-01 | -4.963 | 3.919  |
|                 | time of day (in hours since 9AM) | 0.036                                | 0.041 | 3.82E-01 | -0.044 | 0.116  | 0.036           | 0.046 | 4.33E-01 | -0.054 | 0.126  | 0.038           | 0.046 | 4.16E-01 | -0.053 | 0.128  |
|                 | body length (in SD)              | -                                    | -     | -        | -      | -      | 0.072           | 0.071 | 3.09E-01 | -0.067 | 0.211  | 0.075           | 0.072 | 2.92E-01 | -0.065 | 0.216  |
|                 | dorsal body surface area (in SD) | -                                    | -     | -        | -      | -      | -0.049          | 0.061 | 4.22E-01 | -0.167 | 0.070  | -0.046          | 0.061 | 4.47E-01 | -0.166 | 0.073  |
|                 | LDL cholesterol levels (in SD)   | -                                    | -     | -        | -      | -      | -               | -     | -        | -      | -      | 0.055           | 0.055 | 3.11E-01 | -0.052 | 0.162  |
|                 | HDL cholesterol levels (in SD)   | -                                    | -     | -        | -      | -      | -               | -     | -        | -      | -      | 0.086           | 0.061 | 1.60E-01 | -0.034 | 0.205  |
|                 | triglyceride levels (in SD)      | -                                    | -     | -        | -      | -      | -               | -     | -        | -      | -      | 0.021           | 0.074 | 7.80E-01 | -0.124 | 0.165  |
|                 | glucose levels (in SD)           | -                                    | -     | -        | -      | -      | -               | -     | -        | -      | -      | -0.040          | 0.054 | 4.62E-01 | -0.146 | 0.066  |
|                 | intercept                        | 0.932                                | 1.078 | 3.87E-01 | -1.181 | 3.045  | 1.214           | 1.119 | 2.78E-01 | -0.980 | 3.408  | 1.358           | 1.119 | 2.25E-01 | -0.835 | 3.551  |
|                 | random factors                   | <i>variance by batch</i>             | 0.506 | 0.138    | -      | 0.296  | 0.865           | 0.510 | 0.144    | -      | 0.293  | 0.887           | 0.475 | 0.138    | -      | 0.269  |
| <i>residual</i> |                                  | 0.866                                | 0.032 | -        | 0.805  | 0.932  | 0.883           | 0.035 | -        | 0.817  | 0.954  | 0.879           | 0.035 | -        | 0.813  | 0.950  |

continued Supplementary Table 18

|                         |                                  | Vascular co-localization of lipids with macrophages |          |          |        |        |                 |          |          |        |        |                 |          |          |        |        |
|-------------------------|----------------------------------|-----------------------------------------------------|----------|----------|--------|--------|-----------------|----------|----------|--------|--------|-----------------|----------|----------|--------|--------|
|                         |                                  | Model 1 (n=301)                                     |          |          |        |        | Model 2 (n=269) |          |          |        |        | Model 3 (n=269) |          |          |        |        |
|                         |                                  | Effect                                              | SE       | P        | lci    | uci    | Effect          | SE       | P        | lci    | uci    | Effect          | SE       | P        | lci    | uci    |
| negative binomial terms | genetic burden score             | 0.066                                               | 0.092    | 4.71E-01 | -0.114 | 0.247  | 0.029           | 0.095    | 7.59E-01 | -0.158 | 0.216  | 0.010           | 0.103    | 9.25E-01 | -0.192 | 0.211  |
|                         | <i>apoba</i>                     | 0.259                                               | 0.869    | 7.65E-01 | -1.443 | 1.962  | 0.072           | 0.832    | 9.31E-01 | -1.559 | 1.703  | 0.481           | 0.875    | 5.82E-01 | -1.233 | 2.196  |
|                         | <i>apobb.2</i>                   | -0.765                                              | 0.587    | 1.92E-01 | -1.917 | 0.386  | -0.754          | 0.557    | 1.76E-01 | -1.846 | 0.338  | -0.360          | 0.493    | 4.65E-01 | -1.327 | 0.607  |
|                         | <i>ldlr</i>                      | 15.180                                              | 3.761    | 5.43E-05 | 7.809  | 22.551 | 17.068          | 3.698    | 3.93E-06 | 9.819  | 24.316 | 15.483          | 3.640    | 2.10E-05 | 8.350  | 22.616 |
|                         | time of day (in hours since 9AM) | 0.022                                               | 0.101    | 8.24E-01 | -0.175 | 0.219  | -0.041          | 0.113    | 7.16E-01 | -0.262 | 0.180  | 0.042           | 0.123    | 7.36E-01 | -0.200 | 0.283  |
|                         | body length (in SD)              | -                                                   | -        | -        | -      | -      | -0.397          | 0.204    | 5.16E-02 | -0.796 | 0.003  | -0.338          | 0.230    | 1.42E-01 | -0.789 | 0.113  |
|                         | dorsal body surface area (in SD) | -                                                   | -        | -        | -      | -      | 0.067           | 0.148    | 6.52E-01 | -0.223 | 0.357  | 0.061           | 0.149    | 6.81E-01 | -0.231 | 0.354  |
|                         | LDL cholesterol levels (in SD)   | -                                                   | -        | -        | -      | -      | -               | -        | -        | -      | -      | -0.119          | 0.150    | 4.29E-01 | -0.414 | 0.176  |
|                         | HDL cholesterol levels (in SD)   | -                                                   | -        | -        | -      | -      | -               | -        | -        | -      | -      | 0.182           | 0.153    | 2.35E-01 | -0.118 | 0.482  |
|                         | triglyceride levels (in SD)      | -                                                   | -        | -        | -      | -      | -               | -        | -        | -      | -      | 0.482           | 0.241    | 4.59E-02 | 0.009  | 0.955  |
|                         | glucose levels (in SD)           | -                                                   | -        | -        | -      | -      | -               | -        | -        | -      | -      | -0.128          | 0.139    | 3.56E-01 | -0.400 | 0.144  |
|                         | batch 1                          | 1.324                                               | 0.750    | 7.74E-02 | -0.146 | 2.793  | 1.525           | 0.835    | 6.76E-02 | -0.110 | 3.161  | 1.415           | 0.877    | 1.07E-01 | -0.303 | 3.133  |
|                         | batch 2                          | 0.132                                               | 0.926    | 8.87E-01 | -1.683 | 1.946  | 0.012           | 0.969    | 9.90E-01 | -1.887 | 1.912  | 0.018           | 0.994    | 9.86E-01 | -1.931 | 1.967  |
|                         | batch 3                          | 0.273                                               | 0.753    | 7.17E-01 | -1.203 | 1.748  | 0.252           | 0.781    | 7.46E-01 | -1.278 | 1.782  | 0.152           | 0.771    | 8.44E-01 | -1.360 | 1.663  |
|                         | batch 4                          | 1.378                                               | 0.834    | 9.84E-02 | -0.256 | 3.011  | 0.986           | 0.849    | 2.46E-01 | -0.679 | 2.650  | 0.851           | 0.818    | 2.98E-01 | -0.752 | 2.454  |
|                         | batch 5                          | 1.816                                               | 0.868    | 3.65E-02 | 0.114  | 3.517  | 1.766           | 0.917    | 5.43E-02 | -0.033 | 3.564  | 1.203           | 0.969    | 2.14E-01 | -0.696 | 3.102  |
|                         | batch 6                          | 0.740                                               | 0.789    | 3.48E-01 | -0.806 | 2.286  | 1.264           | 0.933    | 1.76E-01 | -0.565 | 3.094  | 0.589           | 1.029    | 5.67E-01 | -1.427 | 2.606  |
| batch 7                 | -0.383                           | 0.915                                               | 6.76E-01 | -2.176   | 1.411  | -0.144 | 1.066           | 8.92E-01 | -2.234   | 1.945  | -0.449 | 1.121           | 6.89E-01 | -2.645   | 1.748  |        |
| intercept               | -4.162                           | 2.165                                               | 5.46E-02 | -8.406   | 0.082  | -4.308 | 2.087           | 3.90E-02 | -8.399   | -0.217 | -4.870 | 2.132           | 2.23E-02 | -9.049   | -0.692 |        |
|                         |                                  | Vascular infiltration by neutrophils                |          |          |        |        |                 |          |          |        |        |                 |          |          |        |        |
|                         |                                  | Model 1 (n=371)                                     |          |          |        |        | Model 2 (n=330) |          |          |        |        | Model 3 (n=330) |          |          |        |        |
|                         |                                  | Effect                                              | SE       | P        | lci    | uci    | Effect          | SE       | P        | lci    | uci    | Effect          | SE       | P        | lci    | uci    |
| fixed factors           | genetic burden score             | -0.018                                              | 0.033    | 5.78E-01 | -0.082 | 0.046  | -0.026          | 0.035    | 4.57E-01 | -0.094 | 0.042  | -0.029          | 0.035    | 4.10E-01 | -0.098 | 0.040  |
|                         | <i>apoba</i>                     | 0.096                                               | 0.272    | 7.24E-01 | -0.436 | 0.628  | 0.144           | 0.284    | 6.11E-01 | -0.412 | 0.701  | 0.140           | 0.283    | 6.20E-01 | -0.414 | 0.695  |
|                         | <i>apobb.2</i>                   | -0.084                                              | 0.198    | 6.71E-01 | -0.472 | 0.304  | 0.016           | 0.211    | 9.40E-01 | -0.397 | 0.429  | 0.003           | 0.213    | 9.90E-01 | -0.414 | 0.420  |
|                         | <i>ldlr</i>                      | -2.023                                              | 2.259    | 3.71E-01 | -6.451 | 2.405  | -1.483          | 2.282    | 5.16E-01 | -5.955 | 2.990  | -1.459          | 2.286    | 5.23E-01 | -5.940 | 3.021  |
|                         | time of day (in hours since 9AM) | 0.012                                               | 0.041    | 7.65E-01 | -0.067 | 0.092  | -0.020          | 0.045    | 6.55E-01 | -0.107 | 0.067  | -0.022          | 0.045    | 6.20E-01 | -0.110 | 0.065  |
|                         | body length (in SD)              | -                                                   | -        | -        | -      | -      | -0.122          | 0.070    | 7.94E-02 | -0.258 | 0.014  | -0.114          | 0.070    | 1.04E-01 | -0.252 | 0.023  |
|                         | dorsal body surface area (in SD) | -                                                   | -        | -        | -      | -      | 0.060           | 0.059    | 3.12E-01 | -0.056 | 0.176  | 0.075           | 0.060    | 2.11E-01 | -0.043 | 0.193  |
|                         | LDL cholesterol levels (in SD)   | -                                                   | -        | -        | -      | -      | -               | -        | -        | -      | -      | 0.002           | 0.053    | 9.65E-01 | -0.103 | 0.107  |
|                         | HDL cholesterol levels (in SD)   | -                                                   | -        | -        | -      | -      | -               | -        | -        | -      | -      | 0.081           | 0.060    | 1.79E-01 | -0.037 | 0.200  |
|                         | triglyceride levels (in SD)      | -                                                   | -        | -        | -      | -      | -               | -        | -        | -      | -      | -0.042          | 0.071    | 5.50E-01 | -0.181 | 0.097  |
|                         | glucose levels (in SD)           | -                                                   | -        | -        | -      | -      | -               | -        | -        | -      | -      | 0.060           | 0.054    | 2.71E-01 | -0.046 | 0.166  |
|                         | intercept                        | 0.845                                               | 1.091    | 4.38E-01 | -1.293 | 2.983  | 0.536           | 1.116    | 6.31E-01 | -1.651 | 2.723  | 0.570           | 1.117    | 6.10E-01 | -1.619 | 2.759  |
| random factors          | <i>variance by batch</i>         | 0.356                                               | 0.101    | -        | 0.204  | 0.622  | 0.323           | 0.097    | -        | 0.179  | 0.582  | 0.297           | 0.092    | -        | 0.162  | 0.545  |
|                         | <i>residual</i>                  | 0.885                                               | 0.033    | -        | 0.823  | 0.952  | 0.890           | 0.035    | -        | 0.824  | 0.962  | 0.888           | 0.035    | -        | 0.822  | 0.959  |

continued Supplementary Table 18

|                         |                                  | Vascular co-localization of lipids with neutrophils |          |          |        |        |                 |          |          |        |         |                 |          |          |        |        |
|-------------------------|----------------------------------|-----------------------------------------------------|----------|----------|--------|--------|-----------------|----------|----------|--------|---------|-----------------|----------|----------|--------|--------|
|                         |                                  | Model 1 (n=304)                                     |          |          |        |        | Model 2 (n=271) |          |          |        |         | Model 3 (n=271) |          |          |        |        |
|                         |                                  | Effect                                              | SE       | P        | lci    | uci    | Effect          | SE       | P        | lci    | uci     | Effect          | SE       | P        | lci    | uci    |
| negative binomial terms | genetic burden score             | 0.454                                               | 0.100    | 5.63E-06 | 0.258  | 0.650  | 0.383           | 0.122    | 1.73E-03 | 0.144  | 0.623   | 0.276           | 0.143    | 5.37E-02 | -0.004 | 0.556  |
|                         | <i>apoba</i>                     | 0.301                                               | 1.127    | 7.90E-01 | -1.908 | 2.510  | 0.098           | 1.173    | 9.33E-01 | -2.201 | 2.397   | 1.046           | 1.072    | 3.29E-01 | -1.055 | 3.147  |
|                         | <i>apobb.2</i>                   | 0.231                                               | 0.553    | 6.76E-01 | -0.854 | 1.316  | 0.185           | 0.608    | 7.61E-01 | -1.006 | 1.376   | 0.909           | 0.674    | 1.78E-01 | -0.412 | 2.230  |
|                         | <i>ldlr</i>                      | 9.320                                               | 3.741    | 1.27E-02 | 1.987  | 16.653 | 10.263          | 3.782    | 6.66E-03 | 2.850  | 17.677  | 11.151          | 3.863    | 3.89E-03 | 3.580  | 18.722 |
|                         | time of day (in hours since 9AM) | -0.074                                              | 0.165    | 6.54E-01 | -0.398 | 0.250  | -0.176          | 0.187    | 3.46E-01 | -0.542 | 0.190   | -0.198          | 0.169    | 2.43E-01 | -0.529 | 0.134  |
|                         | body length (in SD)              | -                                                   | -        | -        | -      | -      | -0.513          | 0.274    | 6.16E-02 | -1.051 | 0.025   | -0.632          | 0.269    | 1.88E-02 | -1.159 | -0.105 |
|                         | dorsal body surface area (in SD) | -                                                   | -        | -        | -      | -      | -0.004          | 0.224    | 9.87E-01 | -0.443 | 0.436   | -0.074          | 0.208    | 7.23E-01 | -0.482 | 0.334  |
|                         | LDL cholesterol levels (in SD)   | -                                                   | -        | -        | -      | -      | -               | -        | -        | -      | -       | 0.540           | 0.255    | 3.42E-02 | 0.040  | 1.040  |
|                         | HDL cholesterol levels (in SD)   | -                                                   | -        | -        | -      | -      | -               | -        | -        | -      | -       | 0.627           | 0.304    | 3.93E-02 | 0.031  | 1.224  |
|                         | triglyceride levels (in SD)      | -                                                   | -        | -        | -      | -      | -               | -        | -        | -      | -       | 1.083           | 0.290    | 1.93E-04 | 0.513  | 1.652  |
|                         | glucose levels (in SD)           | -                                                   | -        | -        | -      | -      | -               | -        | -        | -      | -       | 0.095           | 0.204    | 6.40E-01 | -0.304 | 0.495  |
|                         | batch 1                          | 3.896                                               | 0.963    | 5.19E-05 | 2.009  | 5.782  | 4.110           | 1.000    | 3.93E-05 | 2.151  | 6.069   | 5.318           | 1.174    | 5.95E-06 | 3.016  | 7.620  |
|                         | batch 2                          | 1.723                                               | 1.095    | 1.16E-01 | -0.423 | 3.870  | 1.735           | 1.136    | 1.27E-01 | -0.492 | 3.961   | 4.159           | 1.448    | 4.08E-03 | 1.320  | 6.997  |
|                         | batch 3                          | 2.330                                               | 1.086    | 3.19E-02 | 0.201  | 4.459  | 2.510           | 1.103    | 2.29E-02 | 0.348  | 4.672   | 3.085           | 1.143    | 6.97E-03 | 0.844  | 5.327  |
|                         | batch 4                          | 3.533                                               | 1.056    | 8.17E-04 | 1.464  | 5.603  | 3.288           | 1.086    | 2.47E-03 | 1.159  | 5.416   | 4.296           | 1.067    | 5.67E-05 | 2.205  | 6.388  |
|                         | batch 5                          | 4.590                                               | 1.077    | 2.01E-05 | 2.480  | 6.700  | 4.720           | 1.103    | 1.86E-05 | 2.559  | 6.881   | 4.782           | 1.145    | 2.98E-05 | 2.537  | 7.027  |
|                         | batch 6                          | 3.473                                               | 1.027    | 7.17E-04 | 1.461  | 5.485  | 3.780           | 1.064    | 3.79E-04 | 1.695  | 5.865   | 4.115           | 1.142    | 3.15E-04 | 1.876  | 6.353  |
| batch 7                 | 1.922                            | 1.340                                               | 1.51E-01 | -0.704   | 4.549  | 2.988  | 1.521           | 4.95E-02 | 0.007    | 5.969  | 3.253   | 1.429           | 2.29E-02 | 0.451    | 6.054  |        |
| intercept               | -8.759                           | 2.629                                               | 8.62E-04 | -13.911  | -3.607 | -8.322 | 2.696           | 2.03E-03 | -13.606  | -3.037 | -11.768 | 2.659           | 9.61E-06 | -16.980  | -6.557 |        |

  

|                         |                                  | Vascular co-localization of macrophages with neutrophils |          |          |        |        |                 |          |          |        |        |                 |          |          |        |        |
|-------------------------|----------------------------------|----------------------------------------------------------|----------|----------|--------|--------|-----------------|----------|----------|--------|--------|-----------------|----------|----------|--------|--------|
|                         |                                  | Model 1 (n=367)                                          |          |          |        |        | Model 2 (n=327) |          |          |        |        | Model 3 (n=327) |          |          |        |        |
|                         |                                  | Effect                                                   | SE       | P        | lci    | uci    | Effect          | SE       | P        | lci    | uci    | Effect          | SE       | P        | lci    | uci    |
| negative binomial terms | genetic burden score             | -0.034                                                   | 0.051    | 5.09E-01 | -0.135 | 0.067  | -0.038          | 0.054    | 4.75E-01 | -0.143 | 0.067  | -0.031          | 0.054    | 5.64E-01 | -0.137 | 0.075  |
|                         | <i>apoba</i>                     | 0.113                                                    | 0.404    | 7.80E-01 | -0.679 | 0.904  | 0.332           | 0.399    | 4.05E-01 | -0.450 | 1.115  | 0.379           | 0.398    | 3.41E-01 | -0.401 | 1.159  |
|                         | <i>apobb.2</i>                   | -0.264                                                   | 0.319    | 4.07E-01 | -0.888 | 0.360  | -0.414          | 0.358    | 2.47E-01 | -1.116 | 0.287  | -0.319          | 0.341    | 3.50E-01 | -0.988 | 0.350  |
|                         | <i>ldlr</i>                      | 0.251                                                    | 0.678    | 7.11E-01 | -1.077 | 1.580  | 0.266           | 0.795    | 7.38E-01 | -1.293 | 1.824  | 0.856           | 0.918    | 3.51E-01 | -0.944 | 2.656  |
|                         | time of day (in hours since 9AM) | 0.069                                                    | 0.067    | 2.98E-01 | -0.061 | 0.200  | 0.085           | 0.071    | 2.29E-01 | -0.053 | 0.223  | 0.069           | 0.074    | 3.50E-01 | -0.076 | 0.214  |
|                         | body length (in SD)              | -                                                        | -        | -        | -      | -      | 0.304           | 0.112    | 6.88E-03 | 0.083  | 0.524  | 0.252           | 0.121    | 3.66E-02 | 0.016  | 0.489  |
|                         | dorsal body surface area (in SD) | -                                                        | -        | -        | -      | -      | 0.261           | 0.110    | 1.83E-02 | 0.044  | 0.477  | 0.253           | 0.116    | 2.90E-02 | 0.026  | 0.479  |
|                         | LDL cholesterol levels (in SD)   | -                                                        | -        | -        | -      | -      | -               | -        | -        | -      | -      | 0.086           | 0.094    | 3.62E-01 | -0.098 | 0.270  |
|                         | HDL cholesterol levels (in SD)   | -                                                        | -        | -        | -      | -      | -               | -        | -        | -      | -      | -0.035          | 0.102    | 7.33E-01 | -0.235 | 0.165  |
|                         | triglyceride levels (in SD)      | -                                                        | -        | -        | -      | -      | -               | -        | -        | -      | -      | -0.037          | 0.127    | 7.72E-01 | -0.285 | 0.211  |
|                         | glucose levels (in SD)           | -                                                        | -        | -        | -      | -      | -               | -        | -        | -      | -      | 0.106           | 0.083    | 2.04E-01 | -0.058 | 0.270  |
|                         | batch 1                          | 0.408                                                    | 0.310    | 1.87E-01 | -0.199 | 1.015  | 0.202           | 0.333    | 5.44E-01 | -0.450 | 0.854  | 0.379           | 0.391    | 3.33E-01 | -0.388 | 1.147  |
|                         | batch 2                          | 0.285                                                    | 0.518    | 5.82E-01 | -0.730 | 1.301  | 0.309           | 0.482    | 5.21E-01 | -0.636 | 1.254  | 0.488           | 0.498    | 3.27E-01 | -0.488 | 1.464  |
|                         | batch 3                          | -0.610                                                   | 0.376    | 1.04E-01 | -1.346 | 0.126  | -0.727          | 0.373    | 5.13E-02 | -1.459 | 0.004  | -0.553          | 0.403    | 1.69E-01 | -1.343 | 0.236  |
|                         | batch 4                          | 0.938                                                    | 0.390    | 1.60E-02 | 0.175  | 1.702  | 1.045           | 0.410    | 1.07E-02 | 0.242  | 1.849  | 1.091           | 0.443    | 1.39E-02 | 0.222  | 1.960  |
|                         | batch 5                          | 0.216                                                    | 0.351    | 5.38E-01 | -0.472 | 0.903  | -0.098          | 0.362    | 7.88E-01 | -0.807 | 0.612  | 0.113           | 0.419    | 7.88E-01 | -0.709 | 0.935  |
|                         | batch 6                          | -1.562                                                   | 0.358    | 1.27E-05 | -2.263 | -0.861 | -2.156          | 0.413    | 1.80E-07 | -2.966 | -1.346 | -2.009          | 0.434    | 3.73E-06 | -2.860 | -1.158 |
| batch 7                 | -0.454                           | 0.460                                                    | 3.24E-01 | -1.355   | 0.448  | -1.079 | 0.517           | 3.67E-02 | -2.092   | -0.067 | -0.986 | 0.599           | 9.96E-02 | -2.160   | 0.188  |        |
| intercept               | 3.911                            | 0.862                                                    | 5.66E-06 | 2.222    | 5.600  | 3.929  | 0.927           | 2.24E-05 | 2.113    | 5.746  | 3.325  | 0.975           | 6.47E-04 | 1.415    | 5.236  |        |

A genetic burden score was calculated by summing the dosage scores for *apoea*, *apoeb*, *apobb.1* and *ldlra*. Dorsal and lateral body surface area and body volume were normalized for body length using residuals. All outcomes were inverse-normally transformed before the analysis. Associations were examined using hierarchical linear models and were adjusted for mutations in *apoba*, *apobb.2* and *ldlr*, time of day and batch. Effects shown for the genetic burden score are for each additional mutated allele. Lci and uci are lower and upper boundaries of the 95% confidence interval.

Supplementary Table 19 - The effect of two vs. zero mutated alleles in *apoea*, *apoeb*, *apobb.1* or *ldlra* on body size

|                |                                  | Body length                                  |         |          |          |         |                                               |         |          |          |         |                                               |         |          |          |         |                                        |       |          |        |        |
|----------------|----------------------------------|----------------------------------------------|---------|----------|----------|---------|-----------------------------------------------|---------|----------|----------|---------|-----------------------------------------------|---------|----------|----------|---------|----------------------------------------|-------|----------|--------|--------|
|                |                                  | <i>apoea</i>                                 |         |          |          |         | <i>apoeb</i>                                  |         |          |          |         | <i>apobb.1</i>                                |         |          |          |         | <i>ldlra</i>                           |       |          |        |        |
|                |                                  | 44 vs. 96 larvae with 2 vs 0 mutated alleles |         |          |          |         | 212 vs. 34 larvae with 2 vs 0 mutated alleles |         |          |          |         | 30 vs. 130 larvae with 2 vs 0 mutated alleles |         |          |          |         | 165 vs. 105 larvae with 2 vs 0 mutated |       |          |        |        |
|                |                                  | Effect                                       | SE      | P        | lci      | uci     | Effect                                        | SE      | P        | lci      | uci     | Effect                                        | SE      | P        | lci      | uci     | Effect                                 | SE    | P        | lci    | uci    |
| fixed factors  | 2 vs. 0 mutated alleles          | 0.057                                        | 0.146   | 6.95E-01 | -0.229   | 0.343   | -0.086                                        | 0.157   | 5.84E-01 | -0.394   | 0.222   | -1.071                                        | 0.149   | 7.19E-13 | -1.364   | -0.779  | 0.155                                  | 0.114 | 1.73E-01 | -0.068 | 0.379  |
|                | <i>apoea</i>                     | -                                            | -       | -        | -        | -       | 0.036                                         | 0.074   | 6.27E-01 | -0.109   | 0.181   | -0.013                                        | 0.089   | 8.80E-01 | -0.187   | 0.160   | -0.002                                 | 0.071 | 9.77E-01 | -0.141 | 0.137  |
|                | <i>apoeb</i>                     | -0.035                                       | 0.107   | 7.40E-01 | -0.244   | 0.174   | -                                             | -       | -        | -        | -       | 0.012                                         | 0.084   | 8.84E-01 | -0.152   | 0.177   | 0.014                                  | 0.075 | 8.49E-01 | -0.133 | 0.162  |
|                | <i>apobb.1</i>                   | -0.460                                       | 0.096   | 1.67E-06 | -0.648   | -0.272  | -0.221                                        | 0.081   | 6.38E-03 | -0.380   | -0.062  | -                                             | -       | -        | -        | -       | -0.397                                 | 0.075 | 1.19E-07 | -0.544 | -0.250 |
|                | <i>ldlra</i>                     | 0.044                                        | 0.078   | 5.69E-01 | -0.108   | 0.197   | 0.022                                         | 0.065   | 7.36E-01 | -0.106   | 0.150   | 0.081                                         | 0.080   | 3.08E-01 | -0.075   | 0.238   | -                                      | -     | -        | -      | -      |
|                | time of day (in hours since 9AM) | 0.006                                        | 0.054   | 9.15E-01 | -0.101   | 0.112   | -0.026                                        | 0.044   | 5.56E-01 | -0.111   | 0.060   | 0.077                                         | 0.047   | 1.02E-01 | -0.015   | 0.168   | -0.057                                 | 0.040 | 1.58E-01 | -0.136 | 0.022  |
|                | intercept                        | -4.855                                       | 59.467  | 9.35E-01 | -121.409 | 111.699 | 15.036                                        | 51.182  | 7.69E-01 | -85.278  | 115.351 | 104.827                                       | 63.695  | 9.98E-02 | -20.013  | 229.667 | -1.214                                 | 0.932 | 1.93E-01 | -3.041 | 0.614  |
|                | <i>apoba</i>                     | 0.041                                        | 0.370   | 9.13E-01 | -0.685   | 0.766   | 0.266                                         | 0.291   | 3.60E-01 | -0.304   | 0.835   | -0.408                                        | 0.320   | 2.02E-01 | -1.035   | 0.219   | -0.046                                 | 0.278 | 8.69E-01 | -0.590 | 0.499  |
|                | <i>apobb.2</i>                   | 0.404                                        | 0.247   | 1.02E-01 | -0.081   | 0.889   | 0.423                                         | 0.183   | 2.12E-02 | 0.063    | 0.782   | 0.526                                         | 0.196   | 7.37E-03 | 0.141    | 0.911   | 0.359                                  | 0.178 | 4.39E-02 | 0.010  | 0.708  |
|                | <i>ldlrb</i>                     | 10.731                                       | 148.645 | 9.42E-01 | -280.607 | 302.069 | -40.149                                       | 128.002 | 7.54E-01 | -291.028 | 210.729 | -263.194                                      | 159.306 | 9.85E-02 | -575.428 | 49.041  | 2.336                                  | 1.790 | 1.92E-01 | -1.172 | 5.844  |
| random factors | variance by batch                | 0.445                                        | 0.136   | -        | 0.245    | 0.810   | 0.508                                         | 0.142   | -        | 0.294    | 0.879   | 0.454                                         | 0.136   | -        | 0.252    | 0.815   | 0.472                                  | 0.131 | -        | 0.274  | 0.812  |
|                | residual                         | 0.666                                        | 0.041   | -        | 0.590    | 0.752   | 0.695                                         | 0.032   | -        | 0.635    | 0.760   | 0.633                                         | 0.036   | -        | 0.566    | 0.709   | 0.694                                  | 0.030 | -        | 0.637  | 0.756  |

  

|                |                                  | Dorsal body surface area                     |         |          |          |         |                                               |         |          |          |         |                                               |         |          |          |         |                                        |       |          |        |       |
|----------------|----------------------------------|----------------------------------------------|---------|----------|----------|---------|-----------------------------------------------|---------|----------|----------|---------|-----------------------------------------------|---------|----------|----------|---------|----------------------------------------|-------|----------|--------|-------|
|                |                                  | <i>apoea</i>                                 |         |          |          |         | <i>apoeb</i>                                  |         |          |          |         | <i>apobb.1</i>                                |         |          |          |         | <i>ldlra</i>                           |       |          |        |       |
|                |                                  | 44 vs. 96 larvae with 2 vs 0 mutated alleles |         |          |          |         | 212 vs. 34 larvae with 2 vs 0 mutated alleles |         |          |          |         | 30 vs. 130 larvae with 2 vs 0 mutated alleles |         |          |          |         | 165 vs. 105 larvae with 2 vs 0 mutated |       |          |        |       |
|                |                                  | Effect                                       | SE      | P        | lci      | uci     | Effect                                        | SE      | P        | lci      | uci     | Effect                                        | SE      | P        | lci      | uci     | Effect                                 | SE    | P        | lci    | uci   |
| fixed factors  | 2 vs. 0 mutated alleles          | -0.138                                       | 0.162   | 3.93E-01 | -0.456   | 0.179   | 0.261                                         | 0.181   | 1.50E-01 | -0.094   | 0.615   | 0.215                                         | 0.190   | 2.58E-01 | -0.158   | 0.588   | -0.166                                 | 0.139 | 2.32E-01 | -0.439 | 0.106 |
|                | <i>apoea</i>                     | -                                            | -       | -        | -        | -       | -0.126                                        | 0.085   | 1.39E-01 | -0.293   | 0.041   | -0.257                                        | 0.112   | 2.20E-02 | -0.478   | -0.037  | -0.117                                 | 0.087 | 1.77E-01 | -0.287 | 0.053 |
|                | <i>apoeb</i>                     | -0.015                                       | 0.119   | 8.98E-01 | -0.248   | 0.218   | -                                             | -       | -        | -        | -       | -0.006                                        | 0.107   | 9.56E-01 | -0.216   | 0.204   | 0.064                                  | 0.092 | 4.87E-01 | -0.116 | 0.244 |
|                | <i>apobb.1</i>                   | 0.287                                        | 0.107   | 7.43E-03 | 0.077    | 0.498   | 0.037                                         | 0.093   | 6.96E-01 | -0.147   | 0.220   | -                                             | -       | -        | -        | -       | 0.137                                  | 0.092 | 1.34E-01 | -0.042 | 0.317 |
|                | <i>ldlra</i>                     | -0.078                                       | 0.087   | 3.72E-01 | -0.249   | 0.093   | -0.081                                        | 0.075   | 2.80E-01 | -0.229   | 0.066   | 0.048                                         | 0.101   | 6.36E-01 | -0.151   | 0.247   | -                                      | -     | -        | -      | -     |
|                | time of day (in hours since 9AM) | 0.106                                        | 0.059   | 7.53E-02 | -0.011   | 0.222   | 0.044                                         | 0.050   | 3.79E-01 | -0.053   | 0.141   | 0.000                                         | 0.058   | 9.95E-01 | -0.114   | 0.115   | 0.066                                  | 0.049 | 1.76E-01 | -0.029 | 0.161 |
|                | intercept                        | 13.639                                       | 66.393  | 8.37E-01 | -116.489 | 143.766 | 73.698                                        | 58.862  | 2.11E-01 | -41.669  | 189.065 | -102.710                                      | 81.214  | 2.06E-01 | -261.885 | 56.466  | 0.913                                  | 1.132 | 4.20E-01 | -1.306 | 3.131 |
|                | <i>apoba</i>                     | 0.509                                        | 0.414   | 2.19E-01 | -0.302   | 1.321   | -0.089                                        | 0.334   | 7.90E-01 | -0.745   | 0.567   | -0.083                                        | 0.406   | 8.38E-01 | -0.880   | 0.714   | 0.273                                  | 0.339 | 4.21E-01 | -0.392 | 0.938 |
|                | <i>apobb.2</i>                   | -0.305                                       | 0.277   | 2.70E-01 | -0.847   | 0.237   | -0.372                                        | 0.211   | 7.87E-02 | -0.786   | 0.043   | -0.542                                        | 0.250   | 3.04E-02 | -1.032   | -0.051  | -0.400                                 | 0.218 | 6.65E-02 | -0.826 | 0.027 |
|                | <i>ldlrb</i>                     | -36.318                                      | 165.957 | 8.27E-01 | -361.589 | 288.952 | -183.074                                      | 147.212 | 2.14E-01 | -471.605 | 105.458 | 259.291                                       | 203.127 | 2.02E-01 | -138.832 | 657.413 | -2.739                                 | 2.185 | 2.10E-01 | -7.021 | 1.544 |
| random factors | variance by batch                | 0.403                                        | 0.146   | -        | 0.199    | 0.818   | 0.451                                         | 0.135   | -        | 0.251    | 0.812   | 0.425                                         | 0.133   | -        | 0.230    | 0.783   | 0.453                                  | 0.131 | -        | 0.256  | 0.800 |
|                | residual                         | 0.745                                        | 0.046   | -        | 0.660    | 0.842   | 0.801                                         | 0.037   | -        | 0.732    | 0.877   | 0.808                                         | 0.046   | -        | 0.722    | 0.905   | 0.849                                  | 0.037 | -        | 0.779  | 0.925 |

  

|                |                                  | Lateral body surface area                    |         |          |          |         |                                               |         |          |          |         |                                               |         |          |          |         |                                        |       |          |        |       |
|----------------|----------------------------------|----------------------------------------------|---------|----------|----------|---------|-----------------------------------------------|---------|----------|----------|---------|-----------------------------------------------|---------|----------|----------|---------|----------------------------------------|-------|----------|--------|-------|
|                |                                  | <i>apoea</i>                                 |         |          |          |         | <i>apoeb</i>                                  |         |          |          |         | <i>apobb.1</i>                                |         |          |          |         | <i>ldlra</i>                           |       |          |        |       |
|                |                                  | 43 vs. 95 larvae with 2 vs 0 mutated alleles |         |          |          |         | 211 vs. 33 larvae with 2 vs 0 mutated alleles |         |          |          |         | 30 vs. 128 larvae with 2 vs 0 mutated alleles |         |          |          |         | 164 vs. 103 larvae with 2 vs 0 mutated |       |          |        |       |
|                |                                  | Effect                                       | SE      | P        | lci      | uci     | Effect                                        | SE      | P        | lci      | uci     | Effect                                        | SE      | P        | lci      | uci     | Effect                                 | SE    | P        | lci    | uci   |
| fixed factors  | 2 vs. 0 mutated alleles          | -0.260                                       | 0.167   | 1.20E-01 | -0.587   | 0.068   | 0.337                                         | 0.193   | 8.04E-02 | -0.041   | 0.714   | 0.041                                         | 0.195   | 8.35E-01 | -0.341   | 0.422   | -0.027                                 | 0.141 | 8.46E-01 | -0.305 | 0.250 |
|                | <i>apoea</i>                     | -                                            | -       | -        | -        | -       | -0.150                                        | 0.089   | 9.23E-02 | -0.324   | 0.025   | -0.343                                        | 0.116   | 3.02E-03 | -0.570   | -0.116  | -0.143                                 | 0.088 | 1.02E-01 | -0.315 | 0.029 |
|                | <i>apoeb</i>                     | 0.091                                        | 0.123   | 4.63E-01 | -0.151   | 0.332   | -                                             | -       | -        | -        | -       | 0.037                                         | 0.110   | 7.35E-01 | -0.178   | 0.252   | 0.128                                  | 0.094 | 1.72E-01 | -0.056 | 0.313 |
|                | <i>apobb.1</i>                   | 0.259                                        | 0.112   | 2.05E-02 | 0.040    | 0.479   | 0.000                                         | 0.098   | 9.99E-01 | -0.191   | 0.192   | -                                             | -       | -        | -        | -       | 0.041                                  | 0.093 | 6.58E-01 | -0.141 | 0.223 |
|                | <i>ldlra</i>                     | -0.020                                       | 0.091   | 8.25E-01 | -0.199   | 0.159   | -0.058                                        | 0.080   | 4.64E-01 | -0.214   | 0.098   | 0.054                                         | 0.105   | 6.08E-01 | -0.152   | 0.259   | -                                      | -     | -        | -      | -     |
|                | time of day (in hours since 9AM) | 0.072                                        | 0.061   | 2.40E-01 | -0.048   | 0.191   | 0.067                                         | 0.052   | 1.95E-01 | -0.034   | 0.168   | -0.017                                        | 0.060   | 7.73E-01 | -0.135   | 0.100   | 0.034                                  | 0.049 | 4.92E-01 | -0.062 | 0.130 |
|                | intercept                        | 2.580                                        | 68.557  | 9.70E-01 | -131.789 | 136.950 | 66.633                                        | 61.642  | 2.80E-01 | -54.183  | 187.448 | -95.130                                       | 82.967  | 2.52E-01 | -257.743 | 67.483  | 0.881                                  | 1.146 | 4.42E-01 | -1.364 | 3.126 |
|                | <i>apoba</i>                     | 0.228                                        | 0.430   | 5.97E-01 | -0.616   | 1.071   | -0.071                                        | 0.355   | 8.42E-01 | -0.766   | 0.624   | -0.171                                        | 0.418   | 6.82E-01 | -0.989   | 0.647   | -0.040                                 | 0.345 | 9.08E-01 | -0.717 | 0.637 |
|                | <i>apobb.2</i>                   | 0.181                                        | 0.286   | 5.27E-01 | -0.380   | 0.742   | -0.066                                        | 0.221   | 7.64E-01 | -0.498   | 0.366   | -0.345                                        | 0.256   | 1.77E-01 | -0.847   | 0.156   | -0.198                                 | 0.220 | 3.67E-01 | -0.629 | 0.232 |
|                | <i>ldlrb</i>                     | -9.404                                       | 171.364 | 9.56E-01 | -345.272 | 326.464 | -166.932                                      | 154.152 | 2.79E-01 | -469.064 | 135.199 | 240.229                                       | 207.510 | 2.47E-01 | -166.484 | 646.941 | -1.960                                 | 2.207 | 3.74E-01 | -6.287 | 2.366 |
| random factors | variance by batch                | 0.382                                        | 0.141   | -        | 0.185    | 0.787   | 0.455                                         | 0.135   | -        | 0.254    | 0.812   | 0.432                                         | 0.137   | -        | 0.231    | 0.805   | 0.442                                  | 0.127 | -        | 0.252  | 0.776 |
|                | residual                         | 0.770                                        | 0.048   | -        | 0.681    | 0.870   | 0.836                                         | 0.039   | -        | 0.764    | 0.915   | 0.826                                         | 0.048   | -        | 0.737    | 0.925   | 0.855                                  | 0.038 | -        | 0.784  | 0.932 |

continued Supplementary Table 19

|                       |                                         | Body volume                                  |          |          |          |          |                                               |          |          |         |         |                                               |          |          |          |        |                                        |          |          |        |       |
|-----------------------|-----------------------------------------|----------------------------------------------|----------|----------|----------|----------|-----------------------------------------------|----------|----------|---------|---------|-----------------------------------------------|----------|----------|----------|--------|----------------------------------------|----------|----------|--------|-------|
|                       |                                         | <i>apoea</i>                                 |          |          |          |          | <i>apoeb</i>                                  |          |          |         |         | <i>apobb.1</i>                                |          |          |          |        | <i>ldra</i>                            |          |          |        |       |
|                       |                                         | 43 vs. 90 larvae with 2 vs 0 mutated alleles |          |          |          |          | 206 vs. 32 larvae with 2 vs 0 mutated alleles |          |          |         |         | 29 vs. 125 larvae with 2 vs 0 mutated alleles |          |          |          |        | 161 vs. 100 larvae with 2 vs 0 mutated |          |          |        |       |
|                       |                                         | Effect                                       | SE       | P        | lci      | uci      | Effect                                        | SE       | P        | lci     | uci     | Effect                                        | SE       | P        | lci      | uci    | Effect                                 | SE       | P        | lci    | uci   |
| <b>fixed factors</b>  | <b>2 vs. 0 mutated alleles</b>          | -0.209                                       | 0.161    | 1.94E-01 | -0.525   | 0.107    | 0.352                                         | 0.191    | 6.49E-02 | -0.022  | 0.726   | 0.074                                         | 0.193    | 7.02E-01 | -0.304   | 0.452  | -0.086                                 | 0.142    | 5.44E-01 | -0.365 | 0.193 |
|                       | <i>apoea</i>                            | -                                            | -        | -        | -        | -        | -0.126                                        | 0.089    | 1.56E-01 | -0.299  | 0.048   | -0.288                                        | 0.115    | 1.24E-02 | -0.514   | -0.062 | -0.108                                 | 0.089    | 2.24E-01 | -0.281 | 0.066 |
|                       | <i>apoeb</i>                            | 0.058                                        | 0.121    | 6.29E-01 | -0.178   | 0.295    | -                                             | -        | -        | -       | -       | 0.042                                         | 0.107    | 6.93E-01 | -0.168   | 0.253  | 0.111                                  | 0.095    | 2.41E-01 | -0.075 | 0.298 |
|                       | <i>apobb.1</i>                          | 0.282                                        | 0.110    | 1.02E-02 | 0.067    | 0.497    | 0.009                                         | 0.097    | 9.23E-01 | -0.182  | 0.200   | -                                             | -        | -        | -        | -      | 0.063                                  | 0.094    | 5.07E-01 | -0.122 | 0.247 |
|                       | <i>ldra</i>                             | -0.014                                       | 0.088    | 8.72E-01 | -0.188   | 0.159    | -0.059                                        | 0.078    | 4.47E-01 | -0.213  | 0.094   | 0.086                                         | 0.104    | 4.10E-01 | -0.118   | 0.289  | -                                      | -        | -        | -      | -     |
|                       | <b>time of day (in hours since 9AM)</b> | 0.123                                        | 0.060    | 4.13E-02 | 0.005    | 0.242    | 0.078                                         | 0.052    | 1.30E-01 | -0.023  | 0.180   | 0.006                                         | 0.060    | 9.25E-01 | -0.112   | 0.124  | 0.062                                  | 0.050    | 2.16E-01 | -0.036 | 0.159 |
|                       | <b>intercept</b>                        | 13.835                                       | 65.406   | 8.32E-01 | -114.357 | 142.028  | 56.403                                        | 61.175   | 3.57E-01 | -63.497 | 176.303 | -92.716                                       | 81.151   | 2.53E-01 | -251.770 | 66.338 | 0.730                                  | 1.147    | 5.25E-01 | -1.518 | 2.978 |
|                       | <i>apoba</i>                            | 0.332                                        | 0.411    | 4.19E-01 | -0.474   | 1.138    | -0.167                                        | 0.346    | 6.30E-01 | -0.845  | 0.512   | -0.234                                        | 0.409    | 5.68E-01 | -1.034   | 0.567  | 0.167                                  | 0.346    | 6.30E-01 | -0.511 | 0.844 |
|                       | <i>apobb.2</i>                          | 0.022                                        | 0.285    | 9.39E-01 | -0.536   | 0.579    | -0.182                                        | 0.219    | 4.06E-01 | -0.611  | 0.247   | -0.424                                        | 0.253    | 9.33E-02 | -0.920   | 0.071  | -0.269                                 | 0.223    | 2.27E-01 | -0.707 | 0.168 |
| <i>ldlr</i>           | -37.762                                 | 163.498                                      | 8.17E-01 | -358.212 | 282.688  | -140.614 | 152.985                                       | 3.58E-01 | -440.459 | 159.231 | 234.401 | 202.978                                       | 2.48E-01 | -163.428 | 632.231  | -2.413 | 2.199                                  | 2.73E-01 | -6.723   | 1.898  |       |
| <b>random factors</b> | <i>variance by batch</i>                | 0.368                                        | 0.134    | -        | 0.181    | 0.750    | 0.449                                         | 0.134    | -        | 0.251   | 0.805   | 0.434                                         | 0.134    | -        | 0.237    | 0.796  | 0.468                                  | 0.133    | -        | 0.269  | 0.817 |
|                       | <i>residual</i>                         | 0.732                                        | 0.047    | -        | 0.646    | 0.829    | 0.814                                         | 0.038    | -        | 0.742   | 0.892   | 0.804                                         | 0.047    | -        | 0.717    | 0.902  | 0.850                                  | 0.038    | -        | 0.779  | 0.927 |

Dorsal and lateral body surface area and body volume were normalized for body length using residuals. All outcomes were inverse-normally transformed before the analysis and examined using hierarchical linear models. Effects shown are for larvae with two mutated alleles that are highly likely to affect protein function as predicted by Ensembl's Variant Effect Predictor (VEP) compared with larvae with zero CRISPR-mutated alleles. Associations were adjusted for the number of mutated alleles in the other six orthologues, weighted by their predicted effect on protein function, as well as for time of day and batch. Lci and uci are lower and upper boundaries of the 95% confidence interval.

Supplementary Table 20 - The effect of two vs. zero mutated alleles in *apoea*, *apoeb*, *apobb.1* or *ldlra* on whole-body lipid and glucose levels

|                |                                  | LDL cholesterol levels                       |         |          |          |         |                                               |         |          |          |         |                                               |         |          |          |         |                                                |       |          |        |       |
|----------------|----------------------------------|----------------------------------------------|---------|----------|----------|---------|-----------------------------------------------|---------|----------|----------|---------|-----------------------------------------------|---------|----------|----------|---------|------------------------------------------------|-------|----------|--------|-------|
|                |                                  | <i>apoea</i>                                 |         |          |          |         | <i>apoeb</i>                                  |         |          |          |         | <i>apobb.1</i>                                |         |          |          |         | <i>ldlra</i>                                   |       |          |        |       |
|                |                                  | 44 vs. 96 larvae with 2 vs 0 mutated alleles |         |          |          |         | 212 vs. 34 larvae with 2 vs 0 mutated alleles |         |          |          |         | 30 vs. 130 larvae with 2 vs 0 mutated alleles |         |          |          |         | 165 vs. 105 larvae with 2 vs 0 mutated alleles |       |          |        |       |
|                |                                  | Effect                                       | SE      | P        | lci      | uci     | Effect                                        | SE      | P        | lci      | uci     | Effect                                        | SE      | P        | lci      | uci     | Effect                                         | SE    | P        | lci    | uci   |
| fixed factors  | 2 vs. 0 mutated alleles          | 0.494                                        | 0.194   | 1.08E-02 | 0.114    | 0.873   | 0.164                                         | 0.206   | 4.25E-01 | -0.239   | 0.567   | -0.205                                        | 0.218   | 3.48E-01 | -0.632   | 0.223   | -0.080                                         | 0.147 | 5.87E-01 | -0.367 | 0.208 |
|                | <i>apoea</i>                     | -                                            | -       | -        | -        | -       | 0.242                                         | 0.097   | 1.21E-02 | 0.053    | 0.431   | 0.163                                         | 0.123   | 1.85E-01 | -0.078   | 0.404   | 0.133                                          | 0.094 | 1.57E-01 | -0.051 | 0.317 |
|                | <i>apoeb</i>                     | 0.030                                        | 0.141   | 8.31E-01 | -0.247   | 0.307   | -                                             | -       | -        | -        | -       | 0.040                                         | 0.118   | 7.32E-01 | -0.191   | 0.272   | 0.075                                          | 0.099 | 4.47E-01 | -0.118 | 0.268 |
|                | <i>apobb.1</i>                   | -0.026                                       | 0.134   | 8.46E-01 | -0.288   | 0.236   | 0.014                                         | 0.108   | 8.95E-01 | -0.197   | 0.225   | -                                             | -       | -        | -        | -       | 0.003                                          | 0.101 | 9.74E-01 | -0.195 | 0.201 |
|                | <i>ldlra</i>                     | -0.087                                       | 0.109   | 4.22E-01 | -0.301   | 0.126   | -0.015                                        | 0.083   | 8.62E-01 | -0.178   | 0.149   | -0.022                                        | 0.111   | 8.44E-01 | -0.240   | 0.196   | -                                              | -     | -        | -      | -     |
|                | time of day (in hours since 9AM) | -0.051                                       | 0.063   | 4.20E-01 | -0.175   | 0.073   | 0.068                                         | 0.051   | 1.83E-01 | -0.032   | 0.168   | 0.046                                         | 0.060   | 4.42E-01 | -0.072   | 0.164   | 0.047                                          | 0.050 | 3.45E-01 | -0.050 | 0.144 |
|                | intercept                        | 27.315                                       | 78.833  | 7.29E-01 | -127.196 | 181.825 | 42.957                                        | 64.470  | 5.05E-01 | -83.401  | 169.315 | 96.277                                        | 89.628  | 2.83E-01 | -79.391  | 271.946 | 0.132                                          | 1.258 | 9.16E-01 | -2.332 | 2.597 |
|                | <i>apoba</i>                     | 0.466                                        | 0.525   | 3.75E-01 | -0.563   | 1.496   | 0.042                                         | 0.378   | 9.11E-01 | -0.698   | 0.782   | 0.044                                         | 0.459   | 9.24E-01 | -0.855   | 0.942   | 0.364                                          | 0.368 | 3.22E-01 | -0.356 | 1.085 |
|                | <i>apobb.2</i>                   | 0.557                                        | 0.350   | 1.11E-01 | -0.128   | 1.242   | 0.412                                         | 0.243   | 9.00E-02 | -0.064   | 0.888   | 0.326                                         | 0.281   | 2.46E-01 | -0.224   | 0.876   | 0.265                                          | 0.238 | 2.66E-01 | -0.202 | 0.731 |
|                | <i>ldlrb</i>                     | -72.128                                      | 197.119 | 7.14E-01 | -458.474 | 314.217 | -110.280                                      | 161.325 | 4.94E-01 | -426.471 | 205.911 | -243.081                                      | 224.383 | 2.79E-01 | -682.863 | 196.702 | -3.696                                         | 2.490 | 1.38E-01 | -8.576 | 1.184 |
| random factors | variance by batch                | 0.202                                        | 0.140   | -        | 0.052    | 0.787   | 0.315                                         | 0.126   | -        | 0.144    | 0.689   | 0.203                                         | 0.383   | -        | 0.005    | 8.145   | 0.356                                          | 0.136 | -        | 0.168  | 0.753 |
|                | residual                         | 0.977                                        | 0.057   | -        | 0.871    | 1.094   | 0.967                                         | 0.042   | -        | 0.889    | 1.052   | 0.958                                         | 0.063   | -        | 0.842    | 1.090   | 0.972                                          | 0.040 | -        | 0.896  | 1.054 |

  

|                |                                  | HDL cholesterol levels |         |          |          |         |              |         |          |          |         |                |         |          |          |         |              |       |          |        |       |
|----------------|----------------------------------|------------------------|---------|----------|----------|---------|--------------|---------|----------|----------|---------|----------------|---------|----------|----------|---------|--------------|-------|----------|--------|-------|
|                |                                  | <i>apoea</i>           |         |          |          |         | <i>apoeb</i> |         |          |          |         | <i>apobb.1</i> |         |          |          |         | <i>ldlra</i> |       |          |        |       |
|                |                                  | Effect                 | SE      | P        | lci      | uci     | Effect       | SE      | P        | lci      | uci     | Effect         | SE      | P        | lci      | uci     | Effect       | SE    | P        | lci    | uci   |
| fixed factors  | 2 vs. 0 mutated alleles          | 0.123                  | 0.190   | 5.15E-01 | -0.248   | 0.495   | 0.223        | 0.180   | 2.16E-01 | -0.130   | 0.577   | 0.253          | 0.189   | 1.79E-01 | -0.116   | 0.623   | 0.072        | 0.132 | 5.85E-01 | -0.187 | 0.331 |
|                | <i>apoea</i>                     | -                      | -       | -        | -        | -       | 0.035        | 0.086   | 6.80E-01 | -0.132   | 0.203   | -0.040         | 0.109   | 7.12E-01 | -0.254   | 0.174   | -0.010       | 0.085 | 9.02E-01 | -0.177 | 0.156 |
|                | <i>apoeb</i>                     | -0.058                 | 0.132   | 6.59E-01 | -0.317   | 0.200   | -            | -       | -        | -        | -       | 0.148          | 0.102   | 1.47E-01 | -0.052   | 0.347   | 0.073        | 0.088 | 4.08E-01 | -0.100 | 0.246 |
|                | <i>apobb.1</i>                   | 0.011                  | 0.124   | 9.29E-01 | -0.233   | 0.255   | 0.037        | 0.095   | 6.93E-01 | -0.148   | 0.223   | -              | -       | -        | -        | -       | 0.118        | 0.090 | 1.90E-01 | -0.059 | 0.296 |
|                | <i>ldlra</i>                     | 0.130                  | 0.101   | 1.99E-01 | -0.068   | 0.328   | 0.104        | 0.073   | 1.56E-01 | -0.040   | 0.248   | 0.090          | 0.098   | 3.60E-01 | -0.103   | 0.283   | -            | -     | -        | -      | -     |
|                | time of day (in hours since 9AM) | -0.077                 | 0.066   | 2.42E-01 | -0.206   | 0.052   | -0.065       | 0.047   | 1.66E-01 | -0.157   | 0.027   | -0.109         | 0.056   | 5.18E-02 | -0.219   | 0.001   | -0.014       | 0.046 | 7.59E-01 | -0.105 | 0.076 |
|                | intercept                        | 79.225                 | 73.332  | 2.80E-01 | -64.504  | 222.954 | -2.809       | 57.043  | 9.61E-01 | -114.611 | 108.993 | -22.711        | 77.230  | 7.69E-01 | -174.080 | 128.657 | -0.979       | 1.141 | 3.91E-01 | -3.216 | 1.257 |
|                | <i>apoba</i>                     | 0.053                  | 0.489   | 9.13E-01 | -0.905   | 1.012   | -0.412       | 0.333   | 2.16E-01 | -1.065   | 0.240   | 0.014          | 0.404   | 9.73E-01 | -0.777   | 0.805   | 0.088        | 0.330 | 7.89E-01 | -0.558 | 0.735 |
|                | <i>apobb.2</i>                   | 0.444                  | 0.324   | 1.70E-01 | -0.191   | 1.078   | 0.196        | 0.214   | 3.60E-01 | -0.223   | 0.614   | 0.210          | 0.243   | 3.88E-01 | -0.266   | 0.686   | 0.229        | 0.213 | 2.84E-01 | -0.189 | 0.646 |
|                | <i>ldlrb</i>                     | -199.333               | 183.370 | 2.77E-01 | -558.731 | 160.065 | 7.909        | 142.733 | 9.56E-01 | -271.843 | 287.661 | 55.951         | 193.319 | 7.72E-01 | -322.947 | 434.849 | 0.810        | 2.237 | 7.17E-01 | -3.574 | 5.194 |
| random factors | variance by batch                | 0.570                  | 0.172   | -        | 0.316    | 1.029   | 0.579        | 0.160   | -        | 0.336    | 0.997   | 0.528          | 0.161   | -        | 0.290    | 0.958   | 0.584        | 0.162 | -        | 0.340  | 1.005 |
|                | residual                         | 0.901                  | 0.052   | -        | 0.804    | 1.008   | 0.847        | 0.036   | -        | 0.779    | 0.921   | 0.822          | 0.045   | -        | 0.739    | 0.914   | 0.869        | 0.036 | -        | 0.801  | 0.942 |

  

|                |                                  | Triglyceride levels |         |          |          |         |              |         |          |          |         |                |         |          |          |         |              |       |          |        |        |
|----------------|----------------------------------|---------------------|---------|----------|----------|---------|--------------|---------|----------|----------|---------|----------------|---------|----------|----------|---------|--------------|-------|----------|--------|--------|
|                |                                  | <i>apoea</i>        |         |          |          |         | <i>apoeb</i> |         |          |          |         | <i>apobb.1</i> |         |          |          |         | <i>ldlra</i> |       |          |        |        |
|                |                                  | Effect              | SE      | P        | lci      | uci     | Effect       | SE      | P        | lci      | uci     | Effect         | SE      | P        | lci      | uci     | Effect       | SE    | P        | lci    | uci    |
| fixed factors  | 2 vs. 0 mutated alleles          | -0.265              | 0.141   | 6.00E-02 | -0.541   | 0.011   | -0.052       | 0.145   | 7.21E-01 | -0.336   | 0.233   | 0.251          | 0.139   | 7.06E-02 | -0.021   | 0.522   | 0.034        | 0.104 | 7.41E-01 | -0.169 | 0.238  |
|                | <i>apoea</i>                     | -                   | -       | -        | -        | -       | -0.075       | 0.069   | 2.77E-01 | -0.210   | 0.060   | -0.093         | 0.081   | 2.51E-01 | -0.251   | 0.066   | -0.037       | 0.067 | 5.80E-01 | -0.168 | 0.094  |
|                | <i>apoeb</i>                     | -0.021              | 0.097   | 8.26E-01 | -0.210   | 0.168   | -            | -       | -        | -        | -       | -0.057         | 0.075   | 4.44E-01 | -0.204   | 0.089   | -0.037       | 0.069 | 5.93E-01 | -0.173 | 0.099  |
|                | <i>apobb.1</i>                   | 0.012               | 0.091   | 8.93E-01 | -0.166   | 0.190   | 0.115        | 0.076   | 1.30E-01 | -0.034   | 0.265   | -              | -       | -        | -        | -       | 0.078        | 0.071 | 2.75E-01 | -0.062 | 0.217  |
|                | <i>ldlra</i>                     | 0.034               | 0.074   | 6.46E-01 | -0.111   | 0.179   | 0.022        | 0.059   | 7.15E-01 | -0.094   | 0.138   | 0.045          | 0.073   | 5.33E-01 | -0.097   | 0.188   | -            | -     | -        | -      | -      |
|                | time of day (in hours since 9AM) | -0.146              | 0.050   | 3.27E-03 | -0.244   | -0.049  | -0.126       | 0.038   | 9.97E-04 | -0.201   | -0.051  | -0.145         | 0.042   | 5.90E-04 | -0.228   | -0.062  | -0.181       | 0.037 | 8.37E-07 | -0.253 | -0.109 |
|                | intercept                        | 43.986              | 53.653  | 4.12E-01 | -61.173  | 149.145 | 21.252       | 46.003  | 6.44E-01 | -68.911  | 111.415 | 36.478         | 56.734  | 5.20E-01 | -74.719  | 147.675 | 0.872        | 0.924 | 3.46E-01 | -0.940 | 2.684  |
|                | <i>apoba</i>                     | 0.079               | 0.358   | 8.25E-01 | -0.622   | 0.780   | -0.091       | 0.268   | 7.35E-01 | -0.616   | 0.435   | 0.025          | 0.298   | 9.32E-01 | -0.558   | 0.609   | -0.012       | 0.259 | 9.64E-01 | -0.520 | 0.497  |
|                | <i>apobb.2</i>                   | -0.401              | 0.236   | 8.97E-02 | -0.865   | 0.062   | -0.402       | 0.172   | 1.96E-02 | -0.739   | -0.064  | -0.538         | 0.179   | 2.59E-03 | -0.889   | -0.188  | -0.246       | 0.167 | 1.42E-01 | -0.574 | 0.082  |
|                | <i>ldlrb</i>                     | -108.252            | 134.160 | 4.20E-01 | -371.202 | 154.697 | -50.755      | 115.105 | 6.59E-01 | -276.357 | 174.846 | -88.498        | 142.009 | 5.33E-01 | -366.830 | 189.835 | -0.338       | 1.759 | 8.48E-01 | -3.786 | 3.110  |
| random factors | variance by batch                | 0.789               | 0.209   | -        | 0.470    | 1.326   | 0.810        | 0.209   | -        | 0.489    | 1.342   | 0.720          | 0.188   | -        | 0.431    | 1.203   | 0.784        | 0.202 | -        | 0.473  | 1.299  |
|                | residual                         | 0.657               | 0.038   | -        | 0.587    | 0.736   | 0.681        | 0.029   | -        | 0.626    | 0.741   | 0.603          | 0.033   | -        | 0.543    | 0.671   | 0.682        | 0.028 | -        | 0.629  | 0.740  |

continued Supplementary Table 20

|                |                                  | Total cholesterol levels |         |          |          |         |              |         |          |          |         |                |         |          |          |         |              |       |          |        |        |
|----------------|----------------------------------|--------------------------|---------|----------|----------|---------|--------------|---------|----------|----------|---------|----------------|---------|----------|----------|---------|--------------|-------|----------|--------|--------|
|                |                                  | <i>apoae</i>             |         |          |          |         | <i>apoeb</i> |         |          |          |         | <i>apobb.1</i> |         |          |          |         | <i>ldlra</i> |       |          |        |        |
|                |                                  | Effect                   | SE      | P        | lci      | uci     | Effect       | SE      | P        | lci      | uci     | Effect         | SE      | P        | lci      | uci     | Effect       | SE    | P        | lci    | uci    |
| fixed factors  | 2 vs. 0 mutated alleles          | 0.204                    | 0.168   | 2.25E-01 | -0.126   | 0.534   | 0.049        | 0.178   | 7.82E-01 | -0.300   | 0.399   | -0.881         | 0.184   | 1.63E-06 | -1.241   | -0.521  | -0.084       | 0.116 | 4.70E-01 | -0.311 | 0.144  |
|                | <i>apoae</i>                     | -                        | -       | -        | -        | -       | 0.135        | 0.085   | 1.11E-01 | -0.031   | 0.301   | 0.074          | 0.107   | 4.88E-01 | -0.135   | 0.283   | 0.066        | 0.075 | 3.80E-01 | -0.081 | 0.212  |
|                | <i>apoeb</i>                     | 0.076                    | 0.116   | 5.09E-01 | -0.150   | 0.303   | -            | -       | -        | -        | -       | 0.007          | 0.099   | 9.47E-01 | -0.188   | 0.201   | 0.031        | 0.077 | 6.89E-01 | -0.121 | 0.183  |
|                | <i>apobb.1</i>                   | -0.351                   | 0.109   | 1.29E-03 | -0.565   | -0.137  | -0.221       | 0.094   | 1.84E-02 | -0.404   | -0.037  | -              | -       | -        | -        | -       | -0.171       | 0.079 | 3.09E-02 | -0.327 | -0.016 |
|                | <i>ldlra</i>                     | -0.018                   | 0.089   | 8.43E-01 | -0.191   | 0.156   | -0.007       | 0.073   | 9.21E-01 | -0.150   | 0.135   | 0.070          | 0.096   | 4.64E-01 | -0.118   | 0.259   | -            | -     | -        | -      | -      |
|                | time of day (in hours since 9AM) | 0.133                    | 0.059   | 2.44E-02 | 0.017    | 0.249   | 0.094        | 0.047   | 4.32E-02 | 0.003    | 0.186   | 0.097          | 0.055   | 8.01E-02 | -0.012   | 0.205   | 0.088        | 0.041 | 3.17E-02 | 0.008  | 0.168  |
|                | intercept                        | 28.011                   | 64.334  | 6.63E-01 | -98.081  | 154.104 | 17.441       | 56.457  | 7.57E-01 | -93.213  | 128.096 | 108.667        | 75.188  | 1.48E-01 | -38.698  | 256.031 | 0.097        | 1.023 | 9.24E-01 | -1.908 | 2.102  |
|                | <i>apoba</i>                     | 0.657                    | 0.429   | 1.26E-01 | -0.184   | 1.498   | 0.071        | 0.329   | 8.30E-01 | -0.575   | 0.716   | 0.042          | 0.394   | 9.16E-01 | -0.730   | 0.814   | 0.196        | 0.290 | 4.98E-01 | -0.371 | 0.764  |
|                | <i>apobb.2</i>                   | -0.009                   | 0.284   | 9.74E-01 | -0.565   | 0.547   | -0.176       | 0.211   | 4.04E-01 | -0.591   | 0.238   | -0.248         | 0.237   | 2.95E-01 | -0.712   | 0.216   | -0.145       | 0.187 | 4.40E-01 | -0.511 | 0.222  |
|                | <i>ldlrb</i>                     | -73.671                  | 160.868 | 6.47E-01 | -388.966 | 241.625 | -43.732      | 141.267 | 7.57E-01 | -320.610 | 233.145 | -271.674       | 188.202 | 1.49E-01 | -640.542 | 97.195  | -0.969       | 1.965 | 6.22E-01 | -4.821 | 2.882  |
| random factors | variance by batch                | 0.761                    | 0.209   | -        | 0.444    | 1.304   | 0.721        | 0.196   | -        | 0.424    | 1.228   | 0.695          | 0.206   | -        | 0.388    | 1.243   | 0.780        | 0.206 | -        | 0.464  | 1.310  |
|                | residual                         | 0.789                    | 0.045   | -        | 0.704    | 0.883   | 0.837        | 0.036   | -        | 0.770    | 0.910   | 0.800          | 0.043   | -        | 0.719    | 0.890   | 0.762        | 0.032 | -        | 0.703  | 0.826  |

  

|                |                                  | Glucose levels |         |          |          |         |              |         |          |          |         |                |         |          |          |         |              |       |          |        |       |
|----------------|----------------------------------|----------------|---------|----------|----------|---------|--------------|---------|----------|----------|---------|----------------|---------|----------|----------|---------|--------------|-------|----------|--------|-------|
|                |                                  | <i>apoae</i>   |         |          |          |         | <i>apoeb</i> |         |          |          |         | <i>apobb.1</i> |         |          |          |         | <i>ldlra</i> |       |          |        |       |
|                |                                  | Effect         | SE      | P        | lci      | uci     | Effect       | SE      | P        | lci      | uci     | Effect         | SE      | P        | lci      | uci     | Effect       | SE    | P        | lci    | uci   |
| fixed factors  | 2 vs. 0 mutated alleles          | -0.270         | 0.199   | 1.74E-01 | -0.659   | 0.120   | 0.202        | 0.205   | 3.24E-01 | -0.199   | 0.603   | -0.485         | 0.210   | 2.10E-02 | -0.897   | -0.073  | -0.153       | 0.140 | 2.73E-01 | -0.427 | 0.121 |
|                | <i>apoae</i>                     | -              | -       | -        | -        | -       | -0.045       | 0.096   | 6.42E-01 | -0.234   | 0.144   | -0.009         | 0.120   | 9.37E-01 | -0.245   | 0.226   | -0.055       | 0.089 | 5.41E-01 | -0.230 | 0.121 |
|                | <i>apoeb</i>                     | 0.065          | 0.140   | 6.42E-01 | -0.210   | 0.340   | -            | -       | -        | -        | -       | -0.001         | 0.114   | 9.90E-01 | -0.224   | 0.221   | 0.112        | 0.094 | 2.33E-01 | -0.072 | 0.295 |
|                | <i>apobb.1</i>                   | -0.226         | 0.132   | 8.73E-02 | -0.486   | 0.033   | -0.137       | 0.107   | 2.00E-01 | -0.347   | 0.073   | -              | -       | -        | -        | -       | -0.138       | 0.096 | 1.50E-01 | -0.326 | 0.050 |
|                | <i>ldlra</i>                     | -0.130         | 0.108   | 2.26E-01 | -0.341   | 0.081   | -0.007       | 0.083   | 9.35E-01 | -0.170   | 0.156   | -0.091         | 0.108   | 4.00E-01 | -0.304   | 0.121   | -            | -     | -        | -      | -     |
|                | time of day (in hours since 9AM) | -0.018         | 0.068   | 7.89E-01 | -0.151   | 0.115   | 0.046        | 0.052   | 3.72E-01 | -0.055   | 0.147   | 0.046          | 0.060   | 4.41E-01 | -0.071   | 0.163   | 0.028        | 0.047 | 5.51E-01 | -0.065 | 0.121 |
|                | intercept                        | -13.418        | 78.005  | 8.63E-01 | -166.306 | 139.469 | 35.006       | 64.294  | 5.86E-01 | -91.008  | 161.019 | 7.275          | 86.223  | 9.33E-01 | -161.719 | 176.269 | 1.685        | 1.197 | 1.59E-01 | -0.661 | 4.031 |
|                | <i>apoba</i>                     | 0.100          | 0.520   | 8.47E-01 | -0.920   | 1.120   | -0.202       | 0.376   | 5.92E-01 | -0.939   | 0.536   | 0.130          | 0.446   | 7.70E-01 | -0.743   | 1.004   | -0.207       | 0.350 | 5.54E-01 | -0.892 | 0.478 |
|                | <i>apobb.2</i>                   | -0.790         | 0.345   | 2.19E-02 | -1.466   | -0.114  | -0.376       | 0.242   | 1.20E-01 | -0.850   | 0.098   | -0.523         | 0.271   | 5.36E-02 | -1.053   | 0.008   | -0.357       | 0.226 | 1.15E-01 | -0.800 | 0.087 |
|                | <i>ldlrb</i>                     | 36.552         | 195.054 | 8.51E-01 | -345.747 | 418.850 | -85.721      | 160.882 | 5.94E-01 | -401.044 | 229.602 | -16.791        | 215.844 | 9.38E-01 | -439.838 | 406.255 | -2.133       | 2.369 | 3.68E-01 | -6.776 | 2.510 |
| random factors | variance by batch                | 0.414          | 0.152   | -        | 0.201    | 0.851   | 0.379        | 0.129   | -        | 0.194    | 0.740   | 0.302          | 0.159   | -        | 0.107    | 0.849   | 0.360        | 0.120 | -        | 0.187  | 0.693 |
|                | residual                         | 0.960          | 0.056   | -        | 0.857    | 1.076   | 0.961        | 0.041   | -        | 0.884    | 1.046   | 0.920          | 0.051   | -        | 0.826    | 1.025   | 0.924        | 0.038 | -        | 0.852  | 1.002 |

Dorsal and lateral body surface area and body volume were normalized for body length using residuals. All outcomes were inverse-normally transformed before the analysis and examined using hierarchical linear models. Effects shown are for larvae with two mutated alleles that are highly likely to affect protein function as predicted by Ensembl's Variant Effect Predictor (VEP) compared with larvae with zero CRISPR-mutated alleles. Associations were adjusted for the number of mutated alleles in the other six orthologues, weighted by their predicted effect on protein function, as well as for time of day and batch. Lci and uci are lower and upper boundaries of the 95% confidence interval.



Supplementary Table 21 - The effect of two vs. zero mutated alleles in *apoea*, *apoeb*, *apobb.1* or *ldlra* on vascular atherogenic traits

|                         |                                  | <i>apoea</i>                                           |          |          |          |         |                                                       |          |          |          |         |                                                       |          |           |          |         |
|-------------------------|----------------------------------|--------------------------------------------------------|----------|----------|----------|---------|-------------------------------------------------------|----------|----------|----------|---------|-------------------------------------------------------|----------|-----------|----------|---------|
|                         |                                  | Model 1                                                |          |          |          |         | Model 2                                               |          |          |          |         | Model 3                                               |          |           |          |         |
|                         |                                  | 31 vs. 83 larvae with 2 vs. 0 mutated alleles (n=114)  |          |          |          |         | 30 vs. 67 larvae with 2 vs. 0 mutated alleles (n=97)  |          |          |          |         | 30 vs. 67 larvae with 2 vs. 0 mutated alleles (n=97)  |          |           |          |         |
|                         |                                  | Effect                                                 | SE       | P        | lci      | uci     | Effect                                                | SE       | P        | lci      | uci     | Effect                                                | SE       | P         | lci      | uci     |
| negative binomial terms | 2 vs. 0 mutated alleles          | -0.773                                                 | 0.419    | 6.55E-02 | -1.595   | 0.050   | -0.802                                                | 0.471    | 8.88E-02 | -1.725   | 0.122   | -0.491                                                | 0.655    | 4.54E-01  | -1.776   | 0.793   |
|                         | <i>apoeb</i>                     | 0.365                                                  | 0.195    | 6.08E-02 | -0.017   | 0.747   | 0.500                                                 | 0.269    | 6.28E-02 | -0.027   | 1.027   | 0.466                                                 | 0.282    | 9.80E-02  | -0.086   | 1.018   |
|                         | <i>apobb.1</i>                   | 1.007                                                  | 0.233    | 1.59E-05 | 0.550    | 1.464   | 0.930                                                 | 0.340    | 6.26E-03 | 0.263    | 1.597   | 0.875                                                 | 0.349    | 1.22E-02  | 0.191    | 1.560   |
|                         | <i>ldlra</i>                     | 0.244                                                  | 0.174    | 1.61E-01 | -0.098   | 0.586   | 0.229                                                 | 0.201    | 2.54E-01 | -0.165   | 0.622   | 0.187                                                 | 0.227    | 4.10E-01  | -0.258   | 0.632   |
|                         | body length (in SD)              | -                                                      | -        | -        | -        | -       | 0.101                                                 | 0.275    | 7.12E-01 | -0.437   | 0.640   | 0.205                                                 | 0.280    | 4.64E-01  | -0.343   | 0.753   |
|                         | dorsal body surface area (in SD) | -                                                      | -        | -        | -        | -       | 0.470                                                 | 0.274    | 8.59E-02 | -0.066   | 1.007   | 0.529                                                 | 0.322    | 9.99E-02  | -0.101   | 1.160   |
|                         | LDL cholesterol levels (in SD)   | -                                                      | -        | -        | -        | -       | -                                                     | -        | -        | -        | -       | -0.156                                                | 0.176    | 3.76E-01  | -0.501   | 0.189   |
|                         | HDL cholesterol levels (in SD)   | -                                                      | -        | -        | -        | -       | -                                                     | -        | -        | -        | -       | 0.051                                                 | 0.251    | 8.39E-01  | -0.442   | 0.544   |
|                         | triglyceride levels (in SD)      | -                                                      | -        | -        | -        | -       | -                                                     | -        | -        | -        | -       | 0.423                                                 | 0.172    | 1.39E-02  | 0.086    | 0.761   |
|                         | glucose levels (in SD)           | -                                                      | -        | -        | -        | -       | -                                                     | -        | -        | -        | -       | 0.133                                                 | 0.224    | 5.52E-01  | -0.306   | 0.573   |
|                         | time of day (in hours since 9AM) | 0.148                                                  | 0.116    | 1.99E-01 | -0.078   | 0.375   | 0.029                                                 | 0.179    | 8.72E-01 | -0.323   | 0.381   | 0.046                                                 | 0.193    | 8.11E-01  | -0.331   | 0.424   |
|                         | batch 2                          | 0.070                                                  | 0.527    | 8.94E-01 | -0.963   | 1.104   | 0.485                                                 | 0.670    | 4.69E-01 | -0.829   | 1.799   | 0.913                                                 | 0.828    | 2.70E-01  | -0.709   | 2.535   |
|                         | batch 3                          | -0.101                                                 | 0.715    | 8.88E-01 | -1.502   | 1.301   | 0.264                                                 | 0.737    | 7.20E-01 | -1.182   | 1.709   | 0.069                                                 | 1.177    | 9.54E-01  | -2.239   | 2.376   |
|                         | batch 4                          | -0.760                                                 | 0.525    | 1.48E-01 | -1.789   | 0.270   | -0.268                                                | 0.679    | 6.93E-01 | -1.599   | 1.063   | -0.372                                                | 0.785    | 6.35E-01  | -1.910   | 1.166   |
|                         | batch 5                          | 0.164                                                  | 0.449    | 7.15E-01 | -0.716   | 1.045   | 0.462                                                 | 0.602    | 4.42E-01 | -0.717   | 1.642   | -0.118                                                | 0.910    | 8.97E-01  | -1.903   | 1.666   |
|                         | batch 6                          | 0.086                                                  | 0.415    | 8.36E-01 | -0.727   | 0.899   | -0.073                                                | 0.568    | 8.97E-01 | -1.187   | 1.040   | -0.803                                                | 0.874    | 3.59E-01  | -2.516   | 0.911   |
|                         | batch 7                          | -0.961                                                 | 0.462    | 3.74E-02 | -1.866   | -0.056  | -1.047                                                | 0.624    | 9.33E-02 | -2.270   | 0.176   | -1.468                                                | 1.048    | 1.61E-01  | -3.522   | 0.586   |
|                         | intercept                        | -91.057                                                | 172.280  | 5.97E-01 | -428.720 | 246.607 | -109.553                                              | 223.730  | 6.24E-01 | -548.056 | 328.950 | -88.167                                               | 263.319  | 7.38E-01  | -604.262 | 427.928 |
|                         | <i>apoba</i>                     | -1.053                                                 | 1.031    | 3.07E-01 | -3.074   | 0.968   | -1.141                                                | 1.295    | 3.78E-01 | -3.680   | 1.397   | -1.129                                                | 1.312    | 3.89E-01  | -3.699   | 1.442   |
|                         | <i>apobb.2</i>                   | -0.319                                                 | 0.517    | 5.37E-01 | -1.333   | 0.694   | -0.360                                                | 0.594    | 5.44E-01 | -1.525   | 0.804   | 0.074                                                 | 0.699    | 9.16E-01  | -1.296   | 1.443   |
| <i>ldlrB</i>            | 241.106                          | 431.619                                                | 5.76E-01 | -604.850 | 1087.063 | 287.842 | 559.627                                               | 6.07E-01 | -809.006 | 1384.690 | 233.629 | 658.235                                               | 7.23E-01 | -1100.000 | 1523.746 |         |
|                         |                                  | Vascular infiltration by macrophages                   |          |          |          |         |                                                       |          |          |          |         |                                                       |          |           |          |         |
|                         |                                  | 47 vs. 104 larvae with 2 vs. 0 mutated alleles (n=151) |          |          |          |         | 44 vs. 89 larvae with 2 vs. 0 mutated alleles (n=133) |          |          |          |         | 44 vs. 89 larvae with 2 vs. 0 mutated alleles (n=133) |          |           |          |         |
|                         |                                  | Effect                                                 | SE       | P        | lci      | uci     | Effect                                                | SE       | P        | lci      | uci     | Effect                                                | SE       | P         | lci      | uci     |
| fixed factors           | 2 vs. 0 mutated alleles          | -0.063                                                 | 0.177    | 7.23E-01 | -0.410   | 0.284   | -0.162                                                | 0.184    | 3.80E-01 | -0.524   | 0.200   | -0.187                                                | 0.187    | 3.18E-01  | -0.552   | 0.179   |
|                         | <i>apoeb</i>                     | -0.013                                                 | 0.126    | 9.18E-01 | -0.260   | 0.234   | -0.006                                                | 0.139    | 9.67E-01 | -0.277   | 0.266   | 0.027                                                 | 0.138    | 8.47E-01  | -0.244   | 0.297   |
|                         | <i>apobb.1</i>                   | -0.240                                                 | 0.123    | 5.12E-02 | -0.481   | 0.001   | -0.294                                                | 0.137    | 3.17E-02 | -0.563   | -0.026  | -0.315                                                | 0.137    | 2.13E-02  | -0.583   | -0.047  |
|                         | <i>ldlra</i>                     | 0.088                                                  | 0.097    | 3.64E-01 | -0.102   | 0.278   | 0.073                                                 | 0.103    | 4.76E-01 | -0.128   | 0.274   | 0.048                                                 | 0.102    | 6.39E-01  | -0.152   | 0.249   |
|                         | body length (in SD)              | -                                                      | -        | -        | -        | -       | -0.193                                                | 0.110    | 7.85E-02 | -0.409   | 0.022   | -0.187                                                | 0.111    | 9.15E-02  | -0.403   | 0.030   |
|                         | dorsal body surface area (in SD) | -                                                      | -        | -        | -        | -       | -0.118                                                | 0.100    | 2.39E-01 | -0.313   | 0.078   | -0.109                                                | 0.101    | 2.83E-01  | -0.307   | 0.090   |
|                         | LDL cholesterol levels (in SD)   | -                                                      | -        | -        | -        | -       | -                                                     | -        | -        | -        | -       | 0.057                                                 | 0.083    | 4.92E-01  | -0.105   | 0.219   |
|                         | HDL cholesterol levels (in SD)   | -                                                      | -        | -        | -        | -       | -                                                     | -        | -        | -        | -       | 0.108                                                 | 0.089    | 2.27E-01  | -0.067   | 0.282   |
|                         | triglyceride levels (in SD)      | -                                                      | -        | -        | -        | -       | -                                                     | -        | -        | -        | -       | 0.105                                                 | 0.112    | 3.47E-01  | -0.114   | 0.324   |
|                         | glucose levels (in SD)           | -                                                      | -        | -        | -        | -       | -                                                     | -        | -        | -        | -       | -0.123                                                | 0.084    | 1.44E-01  | -0.289   | 0.042   |
|                         | time of day (in hours since 9AM) | 0.049                                                  | 0.062    | 4.29E-01 | -0.073   | 0.171   | 0.064                                                 | 0.069    | 3.53E-01 | -0.071   | 0.200   | 0.075                                                 | 0.068    | 2.71E-01  | -0.059   | 0.209   |
|                         | intercept_random                 | -9.339                                                 | 69.740   | 8.93E-01 | -146.027 | 127.350 | 14.432                                                | 77.040   | 8.51E-01 | -136.563 | 165.427 | 8.768                                                 | 76.105   | 9.08E-01  | -140.396 | 157.931 |
|                         | <i>apoba</i>                     | 0.070                                                  | 0.463    | 8.80E-01 | -0.837   | 0.977   | 0.225                                                 | 0.478    | 6.39E-01 | -0.713   | 1.162   | 0.150                                                 | 0.473    | 7.51E-01  | -0.778   | 1.078   |
|                         | <i>apobb.2</i>                   | -0.383                                                 | 0.303    | 2.06E-01 | -0.977   | 0.211   | -0.392                                                | 0.319    | 2.19E-01 | -1.017   | 0.233   | -0.547                                                | 0.327    | 9.47E-02  | -1.189   | 0.095   |
|                         | <i>ldlrB</i>                     | 24.231                                                 | 174.423  | 8.90E-01 | -317.631 | 366.094 | -35.876                                               | 192.602  | 8.52E-01 | -413.370 | 341.618 | -20.891                                               | 190.282  | 9.13E-01  | -393.836 | 352.054 |
|                         | random factors                   | <i>variance by batch</i>                               | 0.463    | 0.149    | -        | 0.247   | 0.869                                                 | 0.407    | 0.141    | -        | 0.206   | 0.803                                                 | 0.373    | 0.140     | -        | 0.178   |
| <i>residual</i>         |                                  | 0.840                                                  | 0.050    | -        | 0.747    | 0.944   | 0.844                                                 | 0.054    | -        | 0.745    | 0.957   | 0.833                                                 | 0.053    | -         | 0.735    | 0.944   |

continued Supplementary Table 21

|                         |                                  | Vascular co-localization of lipids with macrophages    |          |          |          |         |                                                       |          |           |          |         |                                                       |          |           |          |         |
|-------------------------|----------------------------------|--------------------------------------------------------|----------|----------|----------|---------|-------------------------------------------------------|----------|-----------|----------|---------|-------------------------------------------------------|----------|-----------|----------|---------|
|                         |                                  | 31 vs. 80 larvae with 2 vs. 0 mutated alleles (n=111)  |          |          |          |         | 30 vs. 65 larvae with 2 vs. 0 mutated alleles (n=95)  |          |           |          |         | 30 vs. 65 larvae with 2 vs. 0 mutated alleles (n=95)  |          |           |          |         |
|                         |                                  | Effect                                                 | SE       | P        | lci      | uci     | Effect                                                | SE       | P         | lci      | uci     | Effect                                                | SE       | P         | lci      | uci     |
| negative binomial terms | 2 vs. 0 mutated alleles          | -0.387                                                 | 0.699    | 5.80E-01 | -1.758   | 0.984   | -0.748                                                | 0.875    | 3.93E-01  | -2.463   | 0.967   | -0.531                                                | 0.976    | 5.86E-01  | -2.444   | 1.381   |
|                         | <i>apoeb</i>                     | 0.021                                                  | 0.295    | 9.43E-01 | -0.558   | 0.600   | 0.251                                                 | 0.314    | 4.24E-01  | -0.365   | 0.868   | 0.337                                                 | 0.345    | 3.29E-01  | -0.339   | 1.014   |
|                         | <i>apobb.1</i>                   | 1.362                                                  | 0.326    | 2.93E-05 | 0.723    | 2.001   | 1.142                                                 | 0.513    | 2.61E-02  | 0.136    | 2.148   | 0.694                                                 | 0.859    | 4.19E-01  | -0.990   | 2.378   |
|                         | <i>ldlra</i>                     | 0.166                                                  | 0.351    | 6.35E-01 | -0.521   | 0.854   | 0.195                                                 | 0.454    | 6.68E-01  | -0.696   | 1.086   | -0.096                                                | 0.468    | 8.37E-01  | -1.014   | 0.821   |
|                         | body length (in SD)              | -                                                      | -        | -        | -        | -       | 0.078                                                 | 0.479    | 8.70E-01  | -0.860   | 1.016   | 0.023                                                 | 0.611    | 9.71E-01  | -1.174   | 1.219   |
|                         | dorsal body surface area (in SD) | -                                                      | -        | -        | -        | -       | 0.481                                                 | 0.297    | 1.05E-01  | -0.101   | 1.062   | 0.426                                                 | 0.645    | 5.09E-01  | -0.838   | 1.689   |
|                         | LDL cholesterol levels (in SD)   | -                                                      | -        | -        | -        | -       | -                                                     | -        | -         | -        | -       | -0.081                                                | 0.327    | 8.03E-01  | -0.722   | 0.559   |
|                         | HDL cholesterol levels (in SD)   | -                                                      | -        | -        | -        | -       | -                                                     | -        | -         | -        | -       | -0.016                                                | 0.498    | 9.74E-01  | -0.993   | 0.960   |
|                         | triglyceride levels (in SD)      | -                                                      | -        | -        | -        | -       | -                                                     | -        | -         | -        | -       | 1.035                                                 | 0.501    | 3.89E-02  | 0.053    | 2.018   |
|                         | glucose levels (in SD)           | -                                                      | -        | -        | -        | -       | -                                                     | -        | -         | -        | -       | -0.228                                                | 0.522    | 6.62E-01  | -1.250   | 0.794   |
|                         | time of day (in hours since 9AM) | 0.215                                                  | 0.140    | 1.25E-01 | -0.060   | 0.489   | 0.183                                                 | 0.237    | 4.39E-01  | -0.281   | 0.648   | 0.327                                                 | 0.361    | 3.65E-01  | -0.380   | 1.034   |
|                         | batch 2                          | 1.037                                                  | 1.056    | 3.26E-01 | -1.033   | 3.107   | 0.982                                                 | 1.145    | 3.91E-01  | -1.263   | 3.227   | 0.438                                                 | 1.648    | 7.90E-01  | -2.792   | 3.668   |
|                         | batch 3                          | -1.382                                                 | 0.712    | 5.22E-02 | -2.777   | 0.013   | -1.267                                                | 0.862    | 1.42E-01  | -2.956   | 0.423   | -1.449                                                | 1.537    | 3.46E-01  | -4.460   | 1.563   |
|                         | batch 4                          | -0.418                                                 | 0.699    | 5.50E-01 | -1.789   | 0.952   | -0.393                                                | 0.911    | 6.66E-01  | -2.179   | 1.393   | -0.693                                                | 1.405    | 6.22E-01  | -3.447   | 2.061   |
|                         | batch 5                          | 0.438                                                  | 0.619    | 4.80E-01 | -0.776   | 1.651   | 0.017                                                 | 0.789    | 9.83E-01  | -1.529   | 1.563   | -1.515                                                | 1.427    | 2.89E-01  | -4.312   | 1.283   |
|                         | batch 6                          | -0.877                                                 | 0.644    | 1.73E-01 | -2.139   | 0.386   | -1.652                                                | 0.760    | 2.98E-02  | -3.142   | -0.162  | -3.576                                                | 1.802    | 4.72E-02  | -7.107   | -0.044  |
|                         | batch 7                          | -2.995                                                 | 0.769    | 9.76E-05 | -4.501   | -1.488  | -3.887                                                | 0.920    | 2.40E-05  | -5.691   | -2.084  | -4.793                                                | 2.075    | 2.09E-02  | -8.859   | -0.726  |
|                         | intercept                        | -233.734                                               | 227.970  | 3.05E-01 | -680.548 | 213.080 | -196.479                                              | 316.933  | 5.35E-01  | -817.657 | 424.699 | -194.514                                              | 380.442  | 6.09E-01  | -940.167 | 551.139 |
|                         | <i>apoba</i>                     | -1.350                                                 | 1.667    | 4.18E-01 | -4.617   | 1.916   | -1.213                                                | 1.698    | 4.75E-01  | -4.540   | 2.115   | -0.244                                                | 2.329    | 9.16E-01  | -4.809   | 4.320   |
|                         | <i>apobb.2</i>                   | -0.885                                                 | 0.700    | 2.06E-01 | -2.256   | 0.486   | -0.837                                                | 0.713    | 2.41E-01  | -2.235   | 0.561   | -0.087                                                | 1.485    | 9.53E-01  | -2.997   | 2.824   |
| <i>ldlr</i>             | 596.038                          | 572.764                                                | 2.98E-01 | -526.558 | 1718.634 | 502.398 | 792.141                                               | 5.26E-01 | -1100.000 | 2054.967 | 492.382 | 952.213                                               | 6.05E-01 | -1400.000 | 2358.685 |         |
|                         |                                  | Vascular infiltration by neutrophils                   |          |          |          |         |                                                       |          |           |          |         |                                                       |          |           |          |         |
|                         |                                  | 47 vs. 106 larvae with 2 vs. 0 mutated alleles (n=153) |          |          |          |         | 44 vs. 91 larvae with 2 vs. 0 mutated alleles (n=135) |          |           |          |         | 44 vs. 91 larvae with 2 vs. 0 mutated alleles (n=135) |          |           |          |         |
|                         |                                  | Effect                                                 | SE       | P        | lci      | uci     | Effect                                                | SE       | P         | lci      | uci     | Effect                                                | SE       | P         | lci      | uci     |
| fixed factors           | 2 vs. 0 mutated alleles          | -0.064                                                 | 0.179    | 7.20E-01 | -0.416   | 0.287   | -0.080                                                | 0.176    | 6.48E-01  | -0.426   | 0.265   | -0.138                                                | 0.179    | 4.40E-01  | -0.489   | 0.213   |
|                         | <i>apoeb</i>                     | -0.108                                                 | 0.128    | 3.98E-01 | -0.359   | 0.142   | -0.086                                                | 0.131    | 5.12E-01  | -0.344   | 0.171   | -0.083                                                | 0.131    | 5.30E-01  | -0.340   | 0.175   |
|                         | <i>apobb.1</i>                   | 0.140                                                  | 0.125    | 2.65E-01 | -0.106   | 0.386   | -0.113                                                | 0.131    | 3.89E-01  | -0.369   | 0.144   | -0.112                                                | 0.132    | 3.95E-01  | -0.370   | 0.146   |
|                         | <i>ldlra</i>                     | -0.008                                                 | 0.099    | 9.33E-01 | -0.202   | 0.185   | 0.069                                                 | 0.098    | 4.84E-01  | -0.124   | 0.261   | 0.063                                                 | 0.098    | 5.19E-01  | -0.129   | 0.256   |
|                         | body length (in SD)              | -                                                      | -        | -        | -        | -       | -0.315                                                | 0.103    | 2.28E-03  | -0.517   | -0.113  | -0.325                                                | 0.103    | 1.59E-03  | -0.527   | -0.123  |
|                         | dorsal body surface area (in SD) | -                                                      | -        | -        | -        | -       | 0.191                                                 | 0.094    | 4.25E-02  | 0.006    | 0.376   | 0.216                                                 | 0.096    | 2.41E-02  | 0.028    | 0.404   |
|                         | LDL cholesterol levels (in SD)   | -                                                      | -        | -        | -        | -       | -                                                     | -        | -         | -        | -       | 0.130                                                 | 0.077    | 9.08E-02  | -0.021   | 0.282   |
|                         | HDL cholesterol levels (in SD)   | -                                                      | -        | -        | -        | -       | -                                                     | -        | -         | -        | -       | 0.091                                                 | 0.085    | 2.85E-01  | -0.076   | 0.257   |
|                         | triglyceride levels (in SD)      | -                                                      | -        | -        | -        | -       | -                                                     | -        | -         | -        | -       | 0.047                                                 | 0.103    | 6.48E-01  | -0.155   | 0.249   |
|                         | glucose levels (in SD)           | -                                                      | -        | -        | -        | -       | -                                                     | -        | -         | -        | -       | 0.008                                                 | 0.080    | 9.18E-01  | -0.149   | 0.165   |
|                         | time of day (in hours since 9AM) | 0.006                                                  | 0.062    | 9.22E-01 | -0.115   | 0.128   | -0.030                                                | 0.065    | 6.45E-01  | -0.158   | 0.098   | -0.017                                                | 0.064    | 7.90E-01  | -0.142   | 0.108   |
|                         | intercept_random                 | -120.289                                               | 71.401   | 9.20E-02 | -260.231 | 19.654  | -125.307                                              | 73.902   | 9.00E-02  | -270.152 | 19.539  | -134.596                                              | 73.421   | 6.68E-02  | -278.498 | 9.306   |
|                         | <i>apoba</i>                     | 0.345                                                  | 0.471    | 4.63E-01 | -0.577   | 1.268   | 0.182                                                 | 0.456    | 6.89E-01  | -0.711   | 1.076   | 0.087                                                 | 0.455    | 8.49E-01  | -0.805   | 0.978   |
|                         | <i>apobb.2</i>                   | -0.028                                                 | 0.310    | 9.29E-01 | -0.636   | 0.580   | 0.174                                                 | 0.306    | 5.71E-01  | -0.426   | 0.773   | 0.103                                                 | 0.315    | 7.45E-01  | -0.515   | 0.721   |
|                         | <i>ldlr</i>                      | 299.596                                                | 178.573  | 9.34E-02 | -50.401  | 649.593 | 312.556                                               | 184.759  | 9.07E-02  | -49.565  | 674.677 | 336.427                                               | 183.574  | 6.69E-02  | -23.371  | 696.226 |
| random factors          | <i>variance by batch</i>         | 0.375                                                  | 0.121    | -        | 0.199    | 0.706   | 0.334                                                 | 0.121    | -         | 0.164    | 0.681   | 0.271                                                 | 0.117    | -         | 0.116    | 0.632   |
|                         | <i>residual</i>                  | 0.861                                                  | 0.051    | -        | 0.768    | 0.967   | 0.812                                                 | 0.051    | -         | 0.717    | 0.919   | 0.807                                                 | 0.051    | -         | 0.713    | 0.913   |

continued Supplementary Table 21

|                         |                                  | Vascular co-localization of lipids with neutrophils   |          |          |           |          |                                                      |          |          |           |          |                                                      |          |          |           |          |
|-------------------------|----------------------------------|-------------------------------------------------------|----------|----------|-----------|----------|------------------------------------------------------|----------|----------|-----------|----------|------------------------------------------------------|----------|----------|-----------|----------|
|                         |                                  | 31 vs. 75 larvae with 2 vs. 0 mutated alleles (n=106) |          |          |           |          | 30 vs. 60 larvae with 2 vs. 0 mutated alleles (n=90) |          |          |           |          | 30 vs. 60 larvae with 2 vs. 0 mutated alleles (n=90) |          |          |           |          |
|                         |                                  | Effect                                                | SE       | P        | lci       | uci      | Effect                                               | SE       | P        | lci       | uci      | Effect                                               | SE       | P        | lci       | uci      |
| negative binomial terms | 2 vs. 0 mutated alleles          | -0.823                                                | 0.679    | 2.25E-01 | -2.154    | 0.507    | -0.243                                               | 0.568    | 6.69E-01 | -1.355    | 0.870    | -0.523                                               | 0.644    | 4.17E-01 | -1.786    | 0.740    |
|                         | <i>apoeb</i>                     | 0.219                                                 | 0.437    | 6.17E-01 | -0.638    | 1.075    | 0.780                                                | 0.294    | 7.90E-03 | 0.204     | 1.355    | 0.770                                                | 0.322    | 1.67E-02 | 0.140     | 1.401    |
|                         | <i>apobb.1</i>                   | 1.968                                                 | 0.327    | 1.80E-09 | 1.327     | 2.610    | 2.615                                                | 0.502    | 1.90E-07 | 1.631     | 3.599    | 2.243                                                | 0.549    | 4.37E-05 | 1.167     | 3.319    |
|                         | <i>ldlra</i>                     | 0.702                                                 | 0.327    | 3.20E-02 | 0.061     | 1.343    | 0.724                                                | 0.372    | 5.17E-02 | -0.005    | 1.452    | 0.562                                                | 0.354    | 1.13E-01 | -0.132    | 1.256    |
|                         | body length (in SD)              | -                                                     | -        | -        | -         | -        | 0.073                                                | 0.477    | 8.79E-01 | -0.862    | 1.008    | 0.181                                                | 0.533    | 7.34E-01 | -0.863    | 1.225    |
|                         | dorsal body surface area (in SD) | -                                                     | -        | -        | -         | -        | -0.512                                               | 0.503    | 3.08E-01 | -1.497    | 0.473    | -0.284                                               | 0.538    | 5.98E-01 | -1.338    | 0.770    |
|                         | LDL cholesterol levels (in SD)   | -                                                     | -        | -        | -         | -        | -                                                    | -        | -        | -         | -        | 0.033                                                | 0.332    | 9.22E-01 | -0.617    | 0.683    |
|                         | HDL cholesterol levels (in SD)   | -                                                     | -        | -        | -         | -        | -                                                    | -        | -        | -         | -        | 0.646                                                | 0.379    | 8.87E-02 | -0.098    | 1.389    |
|                         | triglyceride levels (in SD)      | -                                                     | -        | -        | -         | -        | -                                                    | -        | -        | -         | -        | 0.655                                                | 0.340    | 5.43E-02 | -0.012    | 1.322    |
|                         | glucose levels (in SD)           | -                                                     | -        | -        | -         | -        | -                                                    | -        | -        | -         | -        | 0.106                                                | 0.262    | 6.85E-01 | -0.407    | 0.620    |
|                         | time of day (in hours since 9AM) | 0.469                                                 | 0.179    | 9.00E-03 | 0.117     | 0.821    | 0.784                                                | 0.279    | 4.96E-03 | 0.237     | 1.331    | 0.642                                                | 0.305    | 3.50E-02 | 0.045     | 1.239    |
|                         | batch 2                          | 0.551                                                 | 1.161    | 6.35E-01 | -1.725    | 2.827    | 1.792                                                | 1.096    | 1.02E-01 | -0.356    | 3.940    | 2.003                                                | 1.165    | 8.55E-02 | -0.280    | 4.286    |
|                         | batch 3                          | -1.322                                                | 1.155    | 2.52E-01 | -3.586    | 0.941    | -0.854                                               | 1.017    | 4.01E-01 | -2.847    | 1.139    | -0.100                                               | 1.270    | 9.38E-01 | -2.589    | 2.390    |
|                         | batch 4                          | -0.266                                                | 0.953    | 7.80E-01 | -2.134    | 1.603    | 0.286                                                | 0.971    | 7.68E-01 | -1.616    | 2.189    | 0.975                                                | 1.147    | 3.95E-01 | -1.273    | 3.223    |
|                         | batch 5                          | -0.247                                                | 0.830    | 7.66E-01 | -1.874    | 1.380    | 0.722                                                | 0.745    | 3.32E-01 | -0.738    | 2.182    | 0.661                                                | 1.019    | 5.16E-01 | -1.336    | 2.659    |
|                         | batch 6                          | -2.620                                                | 0.959    | 6.28E-03 | -4.499    | -0.741   | -1.984                                               | 0.865    | 2.19E-02 | -3.680    | -0.288   | -2.230                                               | 1.129    | 4.83E-02 | -4.443    | -0.017   |
|                         | intercept                        | -791.606                                              | 250.244  | 1.56E-03 | -1300.000 | -301.137 | -918.003                                             | 298.459  | 2.10E-03 | -1500.000 | -333.034 | -853.180                                             | 303.486  | 4.93E-03 | -1400.000 | -258.358 |
|                         | <i>apoba</i>                     | -3.117                                                | 1.464    | 3.32E-02 | -5.987    | -0.248   | -2.355                                               | 1.211    | 5.17E-02 | -4.728    | 0.017    | -2.021                                               | 1.458    | 1.66E-01 | -4.879    | 0.837    |
| <i>apobb.2</i>          | 1.520                            | 0.907                                                 | 9.38E-02 | -0.258   | 3.298     | -0.202   | 0.809                                                | 8.02E-01 | -1.787   | 1.383     | 0.105    | 0.976                                                | 9.14E-01 | -1.808   | 2.018     |          |
| <i>ldlr</i>             | 1982.551                         | 626.570                                               | 1.56E-03 | 754.497  | 3210.604  | 2291.772 | 746.022                                              | 2.13E-03 | 829.596  | 3753.949  | 2128.907 | 756.916                                              | 4.91E-03 | 645.379  | 3612.435  |          |

  

|                         |                                  | Vascular co-localization of macrophages with neutrophils |          |          |         |          |                                                       |          |          |          |          |                                                       |          |          |          |        |
|-------------------------|----------------------------------|----------------------------------------------------------|----------|----------|---------|----------|-------------------------------------------------------|----------|----------|----------|----------|-------------------------------------------------------|----------|----------|----------|--------|
|                         |                                  | 47 vs. 104 larvae with 2 vs. 0 mutated alleles (n=151)   |          |          |         |          | 44 vs. 89 larvae with 2 vs. 0 mutated alleles (n=133) |          |          |          |          | 44 vs. 89 larvae with 2 vs. 0 mutated alleles (n=133) |          |          |          |        |
|                         |                                  | Effect                                                   | SE       | P        | lci     | uci      | Effect                                                | SE       | P        | lci      | uci      | Effect                                                | SE       | P        | lci      | uci    |
| negative binomial terms | 2 vs. 0 mutated alleles          | -0.335                                                   | 0.255    | 1.88E-01 | -0.834  | 0.164    | -0.252                                                | 0.247    | 3.07E-01 | -0.735   | 0.231    | -0.218                                                | 0.245    | 3.75E-01 | -0.699   | 0.263  |
|                         | <i>apoeb</i>                     | -0.434                                                   | 0.195    | 2.61E-02 | -0.816  | -0.052   | -0.336                                                | 0.200    | 9.26E-02 | -0.728   | 0.056    | -0.367                                                | 0.197    | 6.30E-02 | -0.754   | 0.020  |
|                         | <i>apobb.1</i>                   | -0.105                                                   | 0.162    | 5.18E-01 | -0.422  | 0.213    | -0.416                                                | 0.205    | 4.26E-02 | -0.818   | -0.014   | -0.427                                                | 0.201    | 3.36E-02 | -0.821   | -0.033 |
|                         | <i>ldlra</i>                     | 0.198                                                    | 0.138    | 1.50E-01 | -0.071  | 0.468    | 0.203                                                 | 0.143    | 1.57E-01 | -0.078   | 0.483    | 0.177                                                 | 0.145    | 2.22E-01 | -0.107   | 0.462  |
|                         | body length (in SD)              | -                                                        | -        | -        | -       | -        | 0.009                                                 | 0.192    | 9.61E-01 | -0.366   | 0.385    | -0.019                                                | 0.190    | 9.18E-01 | -0.391   | 0.352  |
|                         | dorsal body surface area (in SD) | -                                                        | -        | -        | -       | -        | 0.741                                                 | 0.289    | 1.04E-02 | 0.174    | 1.308    | 0.701                                                 | 0.287    | 1.47E-02 | 0.138    | 1.264  |
|                         | LDL cholesterol levels (in SD)   | -                                                        | -        | -        | -       | -        | -                                                     | -        | -        | -        | -        | 0.229                                                 | 0.114    | 4.45E-02 | 0.006    | 0.451  |
|                         | HDL cholesterol levels (in SD)   | -                                                        | -        | -        | -       | -        | -                                                     | -        | -        | -        | -        | 0.176                                                 | 0.146    | 2.29E-01 | -0.110   | 0.461  |
|                         | triglyceride levels (in SD)      | -                                                        | -        | -        | -       | -        | -                                                     | -        | -        | -        | -        | 0.293                                                 | 0.146    | 4.49E-02 | 0.007    | 0.580  |
|                         | glucose levels (in SD)           | -                                                        | -        | -        | -       | -        | -                                                     | -        | -        | -        | -        | 0.173                                                 | 0.141    | 2.20E-01 | -0.104   | 0.449  |
|                         | time of day (in hours since 9AM) | 0.062                                                    | 0.109    | 5.65E-01 | -0.150  | 0.275    | -0.112                                                | 0.142    | 4.27E-01 | -0.390   | 0.165    | -0.104                                                | 0.135    | 4.43E-01 | -0.368   | 0.161  |
|                         | batch 1                          | -0.433                                                   | 0.383    | 2.58E-01 | -1.183  | 0.317    | -0.120                                                | 0.550    | 8.28E-01 | -1.199   | 0.959    | 0.085                                                 | 0.667    | 8.99E-01 | -1.223   | 1.393  |
|                         | batch 2                          | -0.964                                                   | 0.392    | 1.38E-02 | -1.732  | -0.197   | -0.997                                                | 0.445    | 2.52E-02 | -1.870   | -0.124   | -0.329                                                | 0.542    | 5.43E-01 | -1.391   | 0.732  |
|                         | batch 3                          | -1.324                                                   | 0.485    | 6.36E-03 | -2.276  | -0.373   | -1.012                                                | 0.547    | 6.45E-02 | -2.085   | 0.061    | -0.777                                                | 0.552    | 1.59E-01 | -1.858   | 0.304  |
|                         | batch 4                          | -0.112                                                   | 0.466    | 8.09E-01 | -1.025  | 0.800    | 0.237                                                 | 0.546    | 6.63E-01 | -0.832   | 1.307    | 0.430                                                 | 0.558    | 4.40E-01 | -0.663   | 1.524  |
|                         | batch 5                          | 0.030                                                    | 0.469    | 9.48E-01 | -0.890  | 0.951    | 0.003                                                 | 0.489    | 9.95E-01 | -0.956   | 0.962    | 0.060                                                 | 0.535    | 9.10E-01 | -0.989   | 1.109  |
|                         | batch 6                          | -2.377                                                   | 0.454    | 1.66E-07 | -3.267  | -1.487   | -3.075                                                | 0.624    | 8.32E-07 | -4.298   | -1.852   | -3.125                                                | 0.630    | 7.01E-07 | -4.359   | -1.890 |
|                         | batch 7                          | -1.110                                                   | 0.731    | 1.29E-01 | -2.542  | 0.323    | -1.873                                                | 0.731    | 1.04E-02 | -3.306   | -0.440   | -1.714                                                | 0.733    | 1.93E-02 | -3.151   | -0.278 |
| intercept               | -55.609                          | 120.106                                                  | 6.43E-01 | -291.013 | 179.796 | -196.032 | 143.724                                               | 1.73E-01 | -477.726 | 85.662   | -287.996 | 137.895                                               | 3.68E-02 | -558.265 | -17.727  |        |
| <i>apoba</i>            | 1.159                            | 0.625                                                    | 6.37E-02 | -0.066   | 2.384   | 1.815    | 0.750                                                 | 1.56E-02 | 0.344    | 3.286    | 1.848    | 0.744                                                 | 1.30E-02 | 0.389    | 3.307    |        |
| <i>apobb.2</i>          | -0.200                           | 0.324                                                    | 5.38E-01 | -0.835   | 0.436   | -0.270   | 0.373                                                 | 4.69E-01 | -1.002   | 0.461    | -0.283   | 0.404                                                 | 4.84E-01 | -1.075   | 0.510    |        |
| <i>ldlr</i>             | 146.298                          | 300.491                                                  | 6.26E-01 | -442.654 | 735.250 | 495.866  | 359.236                                               | 1.67E-01 | -208.223 | 1199.955 | 725.424  | 344.591                                               | 3.53E-02 | 50.039   | 1400.809 |        |

continued Supplementary Table 21

|                         |                                  | <i>apoeb</i>                                           |          |          |          |         |                                                        |          |          |          |         |                                                        |          |          |          |         |
|-------------------------|----------------------------------|--------------------------------------------------------|----------|----------|----------|---------|--------------------------------------------------------|----------|----------|----------|---------|--------------------------------------------------------|----------|----------|----------|---------|
|                         |                                  | Vascular lipid deposition                              |          |          |          |         |                                                        |          |          |          |         |                                                        |          |          |          |         |
|                         |                                  | Model 1                                                |          |          |          |         | Model 2                                                |          |          |          |         | Model 3                                                |          |          |          |         |
|                         |                                  | 179 vs. 29 larvae with 2 vs. 0 mutated alleles (n=208) |          |          |          |         | 153 vs. 26 larvae with 2 vs. 0 mutated alleles (n=179) |          |          |          |         | 153 vs. 26 larvae with 2 vs. 0 mutated alleles (n=179) |          |          |          |         |
|                         |                                  | Effect                                                 | SE       | P        | lci      | uci     | Effect                                                 | SE       | P        | lci      | uci     | Effect                                                 | SE       | P        | lci      | uci     |
| negative binomial terms | 2 vs. 0 mutated alleles          | 0.479                                                  | 0.305    | 1.16E-01 | -0.118   | 1.076   | 0.592                                                  | 0.347    | 8.76E-02 | -0.087   | 1.272   | 0.564                                                  | 0.370    | 1.28E-01 | -0.162   | 1.290   |
|                         | <i>apoae</i>                     | -0.238                                                 | 0.188    | 2.06E-01 | -0.606   | 0.131   | -0.331                                                 | 0.210    | 1.15E-01 | -0.742   | 0.081   | -0.263                                                 | 0.207    | 2.04E-01 | -0.667   | 0.142   |
|                         | <i>apobb.1</i>                   | 0.730                                                  | 0.174    | 2.64E-05 | 0.390    | 1.071   | 0.843                                                  | 0.199    | 2.33E-05 | 0.452    | 1.234   | 0.671                                                  | 0.201    | 8.13E-04 | 0.278    | 1.064   |
|                         | <i>ldlra</i>                     | 0.250                                                  | 0.130    | 5.34E-02 | -0.004   | 0.504   | 0.267                                                  | 0.149    | 7.25E-02 | -0.024   | 0.558   | 0.276                                                  | 0.143    | 5.38E-02 | -0.004   | 0.556   |
|                         | body length (in SD)              | -                                                      | -        | -        | -        | -       | 0.238                                                  | 0.159    | 1.34E-01 | -0.074   | 0.550   | 0.336                                                  | 0.158    | 3.36E-02 | 0.026    | 0.646   |
|                         | dorsal body surface area (in SD) | -                                                      | -        | -        | -        | -       | 0.217                                                  | 0.148    | 1.43E-01 | -0.073   | 0.507   | 0.282                                                  | 0.145    | 5.25E-02 | -0.003   | 0.567   |
|                         | LDL cholesterol levels (in SD)   | -                                                      | -        | -        | -        | -       | -                                                      | -        | -        | -        | -       | -0.136                                                 | 0.104    | 1.94E-01 | -0.340   | 0.069   |
|                         | HDL cholesterol levels (in SD)   | -                                                      | -        | -        | -        | -       | -                                                      | -        | -        | -        | -       | -0.055                                                 | 0.168    | 7.43E-01 | -0.384   | 0.274   |
|                         | triglyceride levels (in SD)      | -                                                      | -        | -        | -        | -       | -                                                      | -        | -        | -        | -       | 0.435                                                  | 0.167    | 9.32E-03 | 0.107    | 0.764   |
|                         | glucose levels (in SD)           | -                                                      | -        | -        | -        | -       | -                                                      | -        | -        | -        | -       | -0.202                                                 | 0.102    | 4.80E-02 | -0.403   | -0.002  |
|                         | time of day (in hours since 9AM) | -0.044                                                 | 0.086    | 6.12E-01 | -0.213   | 0.125   | -0.103                                                 | 0.105    | 3.28E-01 | -0.310   | 0.104   | -0.018                                                 | 0.110    | 8.68E-01 | -0.233   | 0.197   |
|                         | batch 2                          | -1.404                                                 | 0.457    | 2.14E-03 | -2.300   | -0.508  | -1.319                                                 | 0.527    | 1.24E-02 | -2.352   | -0.285  | -0.923                                                 | 0.528    | 8.03E-02 | -1.957   | 0.111   |
|                         | batch 3                          | -1.085                                                 | 0.389    | 5.31E-03 | -1.847   | -0.322  | -1.113                                                 | 0.409    | 6.48E-03 | -1.914   | -0.312  | -1.198                                                 | 0.414    | 3.85E-03 | -2.010   | -0.386  |
|                         | batch 4                          | -1.068                                                 | 0.442    | 1.56E-02 | -1.934   | -0.203  | -0.943                                                 | 0.476    | 4.73E-02 | -1.876   | -0.011  | -0.826                                                 | 0.435    | 5.74E-02 | -1.677   | 0.026   |
|                         | batch 5                          | -0.155                                                 | 0.283    | 5.84E-01 | -0.709   | 0.399   | -0.238                                                 | 0.325    | 4.64E-01 | -0.875   | 0.399   | -0.903                                                 | 0.466    | 5.29E-02 | -1.817   | 0.011   |
|                         | batch 6                          | -0.217                                                 | 0.295    | 4.63E-01 | -0.796   | 0.362   | -0.543                                                 | 0.372    | 1.44E-01 | -1.273   | 0.186   | -1.323                                                 | 0.550    | 1.62E-02 | -2.402   | -0.245  |
|                         | batch 7                          | -0.867                                                 | 0.388    | 2.55E-02 | -1.628   | -0.106  | -1.179                                                 | 0.401    | 3.24E-03 | -1.965   | -0.394  | -1.622                                                 | 0.595    | 6.37E-03 | -2.787   | -0.457  |
|                         | intercept                        | 58.235                                                 | 136.197  | 6.69E-01 | -208.706 | 325.175 | 41.113                                                 | 152.198  | 7.87E-01 | -257.191 | 339.416 | 31.011                                                 | 152.088  | 8.38E-01 | -267.075 | 329.097 |
|                         | <i>apoba</i>                     | -0.199                                                 | 0.608    | 7.43E-01 | -1.391   | 0.992   | -0.357                                                 | 0.650    | 5.83E-01 | -1.632   | 0.918   | -0.180                                                 | 0.646    | 7.81E-01 | -1.447   | 1.087   |
|                         | <i>apobb.2</i>                   | 0.001                                                  | 0.463    | 9.98E-01 | -0.907   | 0.909   | -0.029                                                 | 0.491    | 9.52E-01 | -0.992   | 0.933   | 0.336                                                  | 0.478    | 4.82E-01 | -0.601   | 1.274   |
| <i>ldlrb</i>            | -133.537                         | 341.561                                                | 6.96E-01 | -802.985 | 535.911  | -89.418 | 381.314                                                | 8.15E-01 | -836.779 | 657.943  | -66.125 | 381.349                                                | 8.62E-01 | -813.556 | 681.305  |         |
|                         |                                  | Vascular infiltration by macrophages                   |          |          |          |         |                                                        |          |          |          |         |                                                        |          |          |          |         |
|                         |                                  | 237 vs. 37 larvae with 2 vs. 0 mutated alleles (n=274) |          |          |          |         | 206 vs. 34 larvae with 2 vs. 0 mutated alleles (n=240) |          |          |          |         | 206 vs. 34 larvae with 2 vs. 0 mutated alleles (n=240) |          |          |          |         |
|                         |                                  | Effect                                                 | SE       | P        | lci      | uci     | Effect                                                 | SE       | P        | lci      | uci     | Effect                                                 | SE       | P        | lci      | uci     |
| fixed factors           | 2 vs. 0 mutated alleles          | -0.257                                                 | 0.184    | 1.62E-01 | -0.617   | 0.103   | -0.218                                                 | 0.203    | 2.83E-01 | -0.616   | 0.180   | -0.245                                                 | 0.204    | 2.30E-01 | -0.646   | 0.155   |
|                         | <i>apoae</i>                     | -0.117                                                 | 0.088    | 1.82E-01 | -0.289   | 0.055   | -0.148                                                 | 0.096    | 1.24E-01 | -0.336   | 0.041   | -0.160                                                 | 0.097    | 9.97E-02 | -0.350   | 0.030   |
|                         | <i>apobb.1</i>                   | -0.168                                                 | 0.098    | 8.57E-02 | -0.361   | 0.024   | -0.173                                                 | 0.107    | 1.05E-01 | -0.383   | 0.036   | -0.172                                                 | 0.108    | 1.13E-01 | -0.385   | 0.040   |
|                         | <i>ldlra</i>                     | 0.013                                                  | 0.075    | 8.67E-01 | -0.135   | 0.160   | 0.018                                                  | 0.085    | 8.35E-01 | -0.149   | 0.184   | 0.002                                                  | 0.085    | 9.81E-01 | -0.165   | 0.169   |
|                         | body length (in SD)              | -                                                      | -        | -        | -        | -       | 0.023                                                  | 0.086    | 7.91E-01 | -0.146   | 0.192   | 0.024                                                  | 0.088    | 7.85E-01 | -0.148   | 0.195   |
|                         | dorsal body surface area (in SD) | -                                                      | -        | -        | -        | -       | -0.037                                                 | 0.075    | 6.27E-01 | -0.184   | 0.111   | -0.039                                                 | 0.076    | 6.07E-01 | -0.187   | 0.109   |
|                         | LDL cholesterol levels (in SD)   | -                                                      | -        | -        | -        | -       | -                                                      | -        | -        | -        | -       | 0.029                                                  | 0.063    | 6.45E-01 | -0.095   | 0.153   |
|                         | HDL cholesterol levels (in SD)   | -                                                      | -        | -        | -        | -       | -                                                      | -        | -        | -        | -       | 0.112                                                  | 0.074    | 1.30E-01 | -0.033   | 0.256   |
|                         | triglyceride levels (in SD)      | -                                                      | -        | -        | -        | -       | -                                                      | -        | -        | -        | -       | 0.000                                                  | 0.086    | 1.00E+00 | -0.169   | 0.169   |
|                         | glucose levels (in SD)           | -                                                      | -        | -        | -        | -       | -                                                      | -        | -        | -        | -       | 0.031                                                  | 0.064    | 6.34E-01 | -0.095   | 0.156   |
|                         | time of day (in hours since 9AM) | 0.020                                                  | 0.048    | 6.72E-01 | -0.074   | 0.114   | 0.018                                                  | 0.056    | 7.43E-01 | -0.091   | 0.128   | 0.023                                                  | 0.056    | 6.79E-01 | -0.086   | 0.133   |
|                         | intercept_random                 | -49.906                                                | 57.788   | 3.88E-01 | -163.168 | 63.355  | -42.117                                                | 65.580   | 5.21E-01 | -170.650 | 86.417  | -34.466                                                | 65.536   | 5.99E-01 | -162.914 | 93.982  |
|                         | <i>apoba</i>                     | -0.187                                                 | 0.340    | 5.82E-01 | -0.853   | 0.479   | -0.318                                                 | 0.374    | 3.96E-01 | -1.051   | 0.416   | -0.283                                                 | 0.374    | 4.49E-01 | -1.017   | 0.450   |
|                         | <i>apobb.2</i>                   | -0.359                                                 | 0.217    | 9.75E-02 | -0.783   | 0.066   | -0.391                                                 | 0.238    | 9.97E-02 | -0.857   | 0.075   | -0.416                                                 | 0.242    | 8.58E-02 | -0.891   | 0.059   |
|                         | <i>ldlrb</i>                     | 127.830                                                | 144.603  | 3.77E-01 | -155.586 | 411.246 | 109.097                                                | 164.010  | 5.06E-01 | -212.356 | 430.551 | 89.972                                                 | 163.907  | 5.83E-01 | -231.281 | 411.224 |
| random factors          | <i>variance by batch</i>         | 0.510                                                  | 0.143    | -        | 0.295    | 0.883   | 0.492                                                  | 0.143    | -        | 0.278    | 0.870   | 0.452                                                  | 0.136    | -        | 0.250    | 0.816   |
|                         | <i>residual</i>                  | 0.857                                                  | 0.037    | -        | 0.787    | 0.933   | 0.886                                                  | 0.041    | -        | 0.809    | 0.971   | 0.884                                                  | 0.041    | -        | 0.806    | 0.968   |

continued Supplementary Table 21

|                         |                                  | Vascular co-localization of lipids with macrophages    |          |          |          |          |                                                        |          |           |          |          |                                                        |          |           |          |         |
|-------------------------|----------------------------------|--------------------------------------------------------|----------|----------|----------|----------|--------------------------------------------------------|----------|-----------|----------|----------|--------------------------------------------------------|----------|-----------|----------|---------|
|                         |                                  | 174 vs. 29 larvae with 2 vs. 0 mutated alleles (n=203) |          |          |          |          | 150 vs. 26 larvae with 2 vs. 0 mutated alleles (n=176) |          |           |          |          | 150 vs. 26 larvae with 2 vs. 0 mutated alleles (n=176) |          |           |          |         |
|                         |                                  | Effect                                                 | SE       | P        | lci      | uci      | Effect                                                 | SE       | P         | lci      | uci      | Effect                                                 | SE       | P         | lci      | uci     |
| negative binomial terms | 2 vs. 0 mutated alleles          | -0.468                                                 | 0.389    | 2.29E-01 | -1.231   | 0.295    | -0.477                                                 | 0.443    | 2.81E-01  | -1.345   | 0.391    | -0.283                                                 | 0.464    | 5.41E-01  | -1.192   | 0.625   |
|                         | <i>apoEa</i>                     | -0.247                                                 | 0.253    | 3.28E-01 | -0.742   | 0.248    | -0.429                                                 | 0.292    | 1.42E-01  | -1.000   | 0.143    | -0.402                                                 | 0.343    | 2.41E-01  | -1.074   | 0.271   |
|                         | <i>apobb.1</i>                   | 0.934                                                  | 0.220    | 2.27E-05 | 0.502    | 1.366    | 1.015                                                  | 0.287    | 3.99E-04  | 0.453    | 1.576    | 0.692                                                  | 0.352    | 4.91E-02  | 0.003    | 1.382   |
|                         | <i>ldlra</i>                     | 0.242                                                  | 0.185    | 1.91E-01 | -0.121   | 0.606    | 0.306                                                  | 0.221    | 1.65E-01  | -0.126   | 0.739    | 0.368                                                  | 0.220    | 9.40E-02  | -0.063   | 0.799   |
|                         | body length (in SD)              | -                                                      | -        | -        | -        | -        | 0.242                                                  | 0.260    | 3.53E-01  | -0.268   | 0.751    | 0.234                                                  | 0.279    | 4.02E-01  | -0.313   | 0.780   |
|                         | dorsal body surface area (in SD) | -                                                      | -        | -        | -        | -        | 0.471                                                  | 0.184    | 1.07E-02  | 0.109    | 0.832    | 0.446                                                  | 0.182    | 1.46E-02  | 0.088    | 0.804   |
|                         | LDL cholesterol levels (in SD)   | -                                                      | -        | -        | -        | -        | -                                                      | -        | -         | -        | -        | -0.307                                                 | 0.232    | 1.87E-01  | -0.762   | 0.149   |
|                         | HDL cholesterol levels (in SD)   | -                                                      | -        | -        | -        | -        | -                                                      | -        | -         | -        | -        | 0.051                                                  | 0.279    | 8.56E-01  | -0.496   | 0.597   |
|                         | triglyceride levels (in SD)      | -                                                      | -        | -        | -        | -        | -                                                      | -        | -         | -        | -        | 0.467                                                  | 0.265    | 7.77E-02  | -0.052   | 0.986   |
|                         | glucose levels (in SD)           | -                                                      | -        | -        | -        | -        | -                                                      | -        | -         | -        | -        | -0.139                                                 | 0.163    | 3.92E-01  | -0.459   | 0.180   |
|                         | time of day (in hours since 9AM) | 0.097                                                  | 0.098    | 3.24E-01 | -0.095   | 0.289    | 0.200                                                  | 0.124    | 1.05E-01  | -0.042   | 0.443    | 0.338                                                  | 0.138    | 1.47E-02  | 0.067    | 0.609   |
|                         | batch 2                          | -0.438                                                 | 0.824    | 5.95E-01 | -2.053   | 1.177    | -0.016                                                 | 0.967    | 9.87E-01  | -1.911   | 1.880    | -0.594                                                 | 0.914    | 5.16E-01  | -2.384   | 1.197   |
|                         | batch 3                          | -1.015                                                 | 0.444    | 2.21E-02 | -1.885   | -0.146   | -0.976                                                 | 0.490    | 4.65E-02  | -1.936   | -0.015   | -1.036                                                 | 0.648    | 1.10E-01  | -2.305   | 0.234   |
|                         | batch 4                          | -0.450                                                 | 0.471    | 3.40E-01 | -1.373   | 0.474    | -0.505                                                 | 0.568    | 3.74E-01  | -1.619   | 0.608    | -0.674                                                 | 0.600    | 2.62E-01  | -1.851   | 0.503   |
|                         | batch 5                          | 0.033                                                  | 0.377    | 9.30E-01 | -0.706   | 0.772    | -0.486                                                 | 0.464    | 2.95E-01  | -1.396   | 0.424    | -1.300                                                 | 0.662    | 4.97E-02  | -2.597   | -0.002  |
|                         | batch 6                          | -0.548                                                 | 0.370    | 1.38E-01 | -1.273   | 0.176    | -0.968                                                 | 0.532    | 6.91E-02  | -2.011   | 0.076    | -1.528                                                 | 0.962    | 1.12E-01  | -3.413   | 0.357   |
|                         | batch 7                          | -1.275                                                 | 0.742    | 8.58E-02 | -2.729   | 0.180    | -2.061                                                 | 0.725    | 4.46E-03  | -3.482   | -0.640   | -2.677                                                 | 1.017    | 8.47E-03  | -4.671   | -0.684  |
|                         | intercept                        | 20.330                                                 | 157.888  | 8.98E-01 | -289.125 | 329.784  | 52.867                                                 | 187.217  | 7.78E-01  | -314.072 | 419.806  | 162.185                                                | 229.589  | 4.80E-01  | -287.800 | 612.170 |
|                         | <i>apoba</i>                     | -0.470                                                 | 0.923    | 6.11E-01 | -2.278   | 1.339    | -0.523                                                 | 1.012    | 6.06E-01  | -2.507   | 1.461    | -0.572                                                 | 1.353    | 6.73E-01  | -3.223   | 2.080   |
|                         | <i>apobb.2</i>                   | -0.205                                                 | 0.494    | 6.78E-01 | -1.173   | 0.762    | -0.180                                                 | 0.536    | 7.38E-01  | -1.229   | 0.870    | 0.175                                                  | 0.536    | 7.45E-01  | -0.876   | 1.225   |
| <i>ldlrB</i>            | -42.152                          | 396.237                                                | 9.15E-01 | -818.763 | 734.458  | -123.631 | 468.918                                                | 7.92E-01 | -1000.000 | 795.432  | -398.212 | 576.562                                                | 4.90E-01 | -1500.000 | 731.829  |         |
|                         |                                  | Vascular infiltration by neutrophils                   |          |          |          |          |                                                        |          |           |          |          |                                                        |          |           |          |         |
|                         |                                  | 240 vs. 37 larvae with 2 vs. 0 mutated alleles (n=277) |          |          |          |          | 208 vs. 34 larvae with 2 vs. 0 mutated alleles (n=242) |          |           |          |          | 208 vs. 34 larvae with 2 vs. 0 mutated alleles (n=242) |          |           |          |         |
|                         |                                  | Effect                                                 | SE       | P        | lci      | uci      | Effect                                                 | SE       | P         | lci      | uci      | Effect                                                 | SE       | P         | lci      | uci     |
| fixed factors           | 2 vs. 0 mutated alleles          | 0.100                                                  | 0.179    | 5.77E-01 | -0.251   | 0.451    | 0.163                                                  | 0.192    | 3.96E-01  | -0.214   | 0.540    | 0.128                                                  | 0.192    | 5.06E-01  | -0.249   | 0.505   |
|                         | <i>apoEa</i>                     | -0.032                                                 | 0.085    | 7.08E-01 | -0.199   | 0.135    | -0.049                                                 | 0.091    | 5.90E-01  | -0.227   | 0.129    | -0.073                                                 | 0.091    | 4.22E-01  | -0.253   | 0.106   |
|                         | <i>apobb.1</i>                   | 0.125                                                  | 0.095    | 1.89E-01 | -0.061   | 0.311    | 0.104                                                  | 0.101    | 3.02E-01  | -0.093   | 0.301    | 0.106                                                  | 0.102    | 2.96E-01  | -0.093   | 0.305   |
|                         | <i>ldlra</i>                     | -0.083                                                 | 0.073    | 2.58E-01 | -0.227   | 0.061    | -0.078                                                 | 0.080    | 3.32E-01  | -0.236   | 0.079    | -0.099                                                 | 0.080    | 2.18E-01  | -0.256   | 0.058   |
|                         | body length (in SD)              | -                                                      | -        | -        | -        | -        | -0.027                                                 | 0.081    | 7.42E-01  | -0.186   | 0.132    | -0.018                                                 | 0.081    | 8.26E-01  | -0.177   | 0.141   |
|                         | dorsal body surface area (in SD) | -                                                      | -        | -        | -        | -        | 0.070                                                  | 0.070    | 3.17E-01  | -0.068   | 0.209    | 0.076                                                  | 0.070    | 2.80E-01  | -0.062   | 0.213   |
|                         | LDL cholesterol levels (in SD)   | -                                                      | -        | -        | -        | -        | -                                                      | -        | -         | -        | -        | 0.071                                                  | 0.058    | 2.22E-01  | -0.043   | 0.185   |
|                         | HDL cholesterol levels (in SD)   | -                                                      | -        | -        | -        | -        | -                                                      | -        | -         | -        | -        | 0.138                                                  | 0.069    | 4.47E-02  | 0.003    | 0.272   |
|                         | triglyceride levels (in SD)      | -                                                      | -        | -        | -        | -        | -                                                      | -        | -         | -        | -        | -0.012                                                 | 0.079    | 8.77E-01  | -0.167   | 0.143   |
|                         | glucose levels (in SD)           | -                                                      | -        | -        | -        | -        | -                                                      | -        | -         | -        | -        | 0.019                                                  | 0.060    | 7.48E-01  | -0.098   | 0.137   |
|                         | time of day (in hours since 9AM) | 0.041                                                  | 0.046    | 3.69E-01 | -0.049   | 0.132    | 0.002                                                  | 0.052    | 9.72E-01  | -0.100   | 0.104    | 0.006                                                  | 0.052    | 9.02E-01  | -0.095   | 0.108   |
|                         | intercept_random                 | 53.743                                                 | 56.805   | 3.44E-01 | -57.594  | 165.079  | 26.564                                                 | 62.657   | 6.72E-01  | -96.241  | 149.369  | 35.841                                                 | 62.150   | 5.64E-01  | -85.971  | 157.654 |
|                         | <i>apoba</i>                     | 0.077                                                  | 0.330    | 8.15E-01 | -0.570   | 0.725    | 0.102                                                  | 0.353    | 7.73E-01  | -0.590   | 0.794    | 0.131                                                  | 0.351    | 7.09E-01  | -0.557   | 0.820   |
|                         | <i>apobb.2</i>                   | 0.042                                                  | 0.211    | 8.44E-01 | -0.373   | 0.456    | 0.070                                                  | 0.225    | 7.55E-01  | -0.371   | 0.512    | 0.012                                                  | 0.228    | 9.59E-01  | -0.435   | 0.459   |
|                         | <i>ldlrB</i>                     | -135.183                                               | 142.138  | 3.42E-01 | -413.770 | 143.403  | -67.148                                                | 156.701  | 6.68E-01  | -374.276 | 239.980  | -90.157                                                | 155.444  | 5.62E-01  | -394.822 | 214.507 |
| random factors          | <i>variance by batch</i>         | 0.407                                                  | 0.115    | -        | 0.234    | 0.708    | 0.395                                                  | 0.118    | -         | 0.220    | 0.709    | 0.343                                                  | 0.108    | -         | 0.186    | 0.634   |
|                         | <i>residual</i>                  | 0.838                                                  | 0.036    | -        | 0.770    | 0.912    | 0.842                                                  | 0.039    | -         | 0.768    | 0.922    | 0.834                                                  | 0.039    | -         | 0.762    | 0.914   |

continued Supplementary Table 21

|                         |                                  | Vascular co-localization of lipids with neutrophils    |         |          |          |          |                                                        |         |          |           |          |                                                        |         |          |           |          |
|-------------------------|----------------------------------|--------------------------------------------------------|---------|----------|----------|----------|--------------------------------------------------------|---------|----------|-----------|----------|--------------------------------------------------------|---------|----------|-----------|----------|
|                         |                                  | 168 vs. 27 larvae with 2 vs. 0 mutated alleles (n=195) |         |          |          |          | 143 vs. 24 larvae with 2 vs. 0 mutated alleles (n=167) |         |          |           |          | 143 vs. 24 larvae with 2 vs. 0 mutated alleles (n=167) |         |          |           |          |
|                         |                                  | Effect                                                 | SE      | P        | lci      | uci      | Effect                                                 | SE      | P        | lci       | uci      | Effect                                                 | SE      | P        | lci       | uci      |
| negative binomial terms | 2 vs. 0 mutated alleles          | -0.389                                                 | 0.565   | 4.91E-01 | -1.495   | 0.717    | 0.227                                                  | 0.643   | 7.24E-01 | -1.033    | 1.488    | -0.109                                                 | 0.648   | 8.67E-01 | -1.379    | 1.162    |
|                         | <i>apoea</i>                     | -0.241                                                 | 0.339   | 4.77E-01 | -0.906   | 0.423    | 0.048                                                  | 0.373   | 8.99E-01 | -0.684    | 0.779    | -0.974                                                 | 0.391   | 1.27E-02 | -1.740    | -0.208   |
|                         | <i>apobb.1</i>                   | 1.748                                                  | 0.280   | 4.46E-10 | 1.198    | 2.297    | 1.812                                                  | 0.380   | 1.90E-06 | 1.066     | 2.557    | 1.613                                                  | 0.377   | 1.88E-05 | 0.874     | 2.351    |
|                         | <i>ldlra</i>                     | 0.240                                                  | 0.315   | 4.46E-01 | -0.377   | 0.858    | 0.092                                                  | 0.322   | 7.76E-01 | -0.540    | 0.723    | 0.074                                                  | 0.272   | 7.85E-01 | -0.459    | 0.607    |
|                         | body length (in SD)              | -                                                      | -       | -        | -        | -        | 0.071                                                  | 0.504   | 8.88E-01 | -0.917    | 1.060    | -0.058                                                 | 0.414   | 8.88E-01 | -0.870    | 0.754    |
|                         | dorsal body surface area (in SD) | -                                                      | -       | -        | -        | -        | -0.177                                                 | 0.246   | 4.71E-01 | -0.659    | 0.305    | -0.160                                                 | 0.245   | 5.14E-01 | -0.640    | 0.320    |
|                         | LDL cholesterol levels (in SD)   | -                                                      | -       | -        | -        | -        | -                                                      | -       | -        | -         | -        | 0.261                                                  | 0.286   | 3.61E-01 | -0.299    | 0.821    |
|                         | HDL cholesterol levels (in SD)   | -                                                      | -       | -        | -        | -        | -                                                      | -       | -        | -         | -        | 0.751                                                  | 0.406   | 6.40E-02 | -0.044    | 1.546    |
|                         | triglyceride levels (in SD)      | -                                                      | -       | -        | -        | -        | -                                                      | -       | -        | -         | -        | 1.409                                                  | 0.367   | 1.24E-04 | 0.689     | 2.129    |
|                         | glucose levels (in SD)           | -                                                      | -       | -        | -        | -        | -                                                      | -       | -        | -         | -        | -0.008                                                 | 0.215   | 9.71E-01 | -0.428    | 0.413    |
|                         | time of day (in hours since 9AM) | 0.062                                                  | 0.169   | 7.16E-01 | -0.270   | 0.393    | 0.188                                                  | 0.195   | 3.36E-01 | -0.195    | 0.570    | 0.500                                                  | 0.228   | 2.84E-02 | 0.053     | 0.947    |
|                         | batch 2                          | -1.617                                                 | 0.813   | 4.68E-02 | -3.211   | -0.023   | -1.605                                                 | 1.080   | 1.37E-01 | -3.722    | 0.511    | -1.421                                                 | 0.967   | 1.42E-01 | -3.316    | 0.474    |
|                         | batch 3                          | -0.752                                                 | 0.834   | 3.67E-01 | -2.387   | 0.882    | -0.720                                                 | 0.791   | 3.63E-01 | -2.269    | 0.830    | -1.398                                                 | 0.714   | 5.01E-02 | -2.797    | 0.000    |
|                         | batch 4                          | -0.887                                                 | 0.621   | 1.53E-01 | -2.104   | 0.330    | -0.638                                                 | 0.817   | 4.35E-01 | -2.240    | 0.964    | -1.172                                                 | 0.794   | 1.40E-01 | -2.728    | 0.384    |
|                         | batch 5                          | -0.277                                                 | 0.510   | 5.87E-01 | -1.277   | 0.722    | -0.327                                                 | 0.550   | 5.52E-01 | -1.405    | 0.751    | -2.983                                                 | 0.935   | 1.42E-03 | -4.816    | -1.150   |
|                         | batch 6                          | -2.640                                                 | 0.635   | 3.23E-05 | -3.885   | -1.395   | -2.827                                                 | 0.837   | 7.28E-04 | -4.467    | -1.187   | -4.597                                                 | 1.110   | 3.43E-05 | -6.771    | -2.422   |
|                         | intercept                        | -101.955                                               | 224.820 | 6.50E-01 | -542.594 | 338.684  | 7.020                                                  | 339.258 | 9.83E-01 | -657.913  | 671.953  | 444.862                                                | 301.233 | 1.40E-01 | -145.544  | 1035.268 |
|                         | <i>apoba</i>                     | 0.531                                                  | 1.282   | 6.79E-01 | -1.982   | 3.045    | 1.061                                                  | 1.155   | 3.58E-01 | -1.203    | 3.324    | 2.821                                                  | 1.272   | 2.66E-02 | 0.327     | 5.315    |
|                         | <i>apobb.2</i>                   | 0.600                                                  | 0.670   | 3.71E-01 | -0.714   | 1.913    | -0.122                                                 | 0.678   | 8.57E-01 | -1.451    | 1.206    | 1.634                                                  | 0.789   | 3.84E-02 | 0.087     | 3.180    |
|                         | <i>ldlrB</i>                     | 251.587                                                | 564.907 | 6.56E-01 | -855.610 | 1358.785 | -23.731                                                | 850.679 | 9.78E-01 | -1700.000 | 1643.569 | -1100.000                                              | 755.388 | 1.35E-01 | -2600.000 | 350.537  |

  

|                         |                                  | Vascular co-localization of macrophages with neutrophils |          |          |          |         |                                                        |          |          |          |         |                                                        |          |          |          |         |
|-------------------------|----------------------------------|----------------------------------------------------------|----------|----------|----------|---------|--------------------------------------------------------|----------|----------|----------|---------|--------------------------------------------------------|----------|----------|----------|---------|
|                         |                                  | 236 vs. 37 larvae with 2 vs. 0 mutated alleles (n=273)   |          |          |          |         | 205 vs. 34 larvae with 2 vs. 0 mutated alleles (n=239) |          |          |          |         | 205 vs. 34 larvae with 2 vs. 0 mutated alleles (n=239) |          |          |          |         |
|                         |                                  | Effect                                                   | SE       | P        | lci      | uci     | Effect                                                 | SE       | P        | lci      | uci     | Effect                                                 | SE       | P        | lci      | uci     |
| negative binomial terms | 2 vs. 0 mutated alleles          | 0.504                                                    | 0.278    | 7.02E-02 | -0.042   | 1.050   | 0.498                                                  | 0.280    | 7.53E-02 | -0.051   | 1.047   | 0.444                                                  | 0.280    | 1.13E-01 | -0.105   | 0.993   |
|                         | <i>apoea</i>                     | -0.111                                                   | 0.148    | 4.54E-01 | -0.400   | 0.179   | -0.100                                                 | 0.157    | 5.26E-01 | -0.407   | 0.208   | -0.073                                                 | 0.160    | 6.50E-01 | -0.386   | 0.241   |
|                         | <i>apobb.1</i>                   | 0.111                                                    | 0.164    | 5.00E-01 | -0.211   | 0.432   | 0.142                                                  | 0.163    | 3.84E-01 | -0.178   | 0.462   | 0.223                                                  | 0.162    | 1.69E-01 | -0.095   | 0.542   |
|                         | <i>ldlra</i>                     | -0.181                                                   | 0.126    | 1.50E-01 | -0.428   | 0.066   | -0.178                                                 | 0.121    | 1.41E-01 | -0.415   | 0.059   | -0.201                                                 | 0.119    | 9.11E-02 | -0.434   | 0.032   |
|                         | body length (in SD)              | -                                                        | -        | -        | -        | -       | 0.471                                                  | 0.145    | 1.16E-03 | 0.187    | 0.755   | 0.445                                                  | 0.145    | 2.21E-03 | 0.160    | 0.729   |
|                         | dorsal body surface area (in SD) | -                                                        | -        | -        | -        | -       | 0.289                                                  | 0.133    | 3.01E-02 | 0.028    | 0.550   | 0.250                                                  | 0.130    | 5.49E-02 | -0.005   | 0.506   |
|                         | LDL cholesterol levels (in SD)   | -                                                        | -        | -        | -        | -       | -                                                      | -        | -        | -        | -       | 0.073                                                  | 0.102    | 4.76E-01 | -0.127   | 0.273   |
|                         | HDL cholesterol levels (in SD)   | -                                                        | -        | -        | -        | -       | -                                                      | -        | -        | -        | -       | 0.082                                                  | 0.119    | 4.89E-01 | -0.151   | 0.315   |
|                         | triglyceride levels (in SD)      | -                                                        | -        | -        | -        | -       | -                                                      | -        | -        | -        | -       | -0.078                                                 | 0.149    | 6.01E-01 | -0.370   | 0.215   |
|                         | glucose levels (in SD)           | -                                                        | -        | -        | -        | -       | -                                                      | -        | -        | -        | -       | 0.256                                                  | 0.089    | 3.79E-03 | 0.083    | 0.430   |
|                         | time of day (in hours since 9AM) | 0.112                                                    | 0.077    | 1.43E-01 | -0.038   | 0.263   | 0.117                                                  | 0.090    | 1.93E-01 | -0.059   | 0.293   | 0.120                                                  | 0.092    | 1.94E-01 | -0.061   | 0.301   |
|                         | batch 1                          | 0.658                                                    | 0.409    | 1.07E-01 | -0.143   | 1.459   | 0.246                                                  | 0.463    | 5.95E-01 | -0.661   | 1.154   | 0.254                                                  | 0.535    | 6.35E-01 | -0.794   | 1.302   |
|                         | batch 2                          | 0.750                                                    | 0.544    | 1.68E-01 | -0.316   | 1.817   | 0.756                                                  | 0.498    | 1.29E-01 | -0.221   | 1.732   | 0.924                                                  | 0.538    | 8.61E-02 | -0.131   | 1.979   |
|                         | batch 3                          | -0.204                                                   | 0.517    | 6.93E-01 | -1.216   | 0.809   | -0.543                                                 | 0.525    | 3.01E-01 | -1.573   | 0.486   | -0.473                                                 | 0.551    | 3.91E-01 | -1.552   | 0.606   |
|                         | batch 4                          | 1.501                                                    | 0.490    | 2.20E-03 | 0.540    | 2.462   | 1.571                                                  | 0.519    | 2.46E-03 | 0.554    | 2.587   | 1.458                                                  | 0.561    | 9.42E-03 | 0.357    | 2.558   |
|                         | batch 5                          | 0.456                                                    | 0.449    | 3.10E-01 | -0.424   | 1.335   | -0.114                                                 | 0.493    | 8.17E-01 | -1.080   | 0.852   | 0.084                                                  | 0.546    | 8.77E-01 | -0.985   | 1.154   |
|                         | batch 6                          | -1.210                                                   | 0.466    | 9.40E-03 | -2.123   | -0.297  | -2.083                                                 | 0.588    | 3.99E-04 | -3.236   | -0.930  | -1.925                                                 | 0.620    | 1.90E-03 | -3.139   | -0.710  |
|                         | batch 7                          | -0.190                                                   | 0.604    | 7.53E-01 | -1.374   | 0.994   | -1.063                                                 | 0.767    | 1.66E-01 | -2.567   | 0.441   | -1.109                                                 | 0.819    | 1.75E-01 | -2.714   | 0.495   |
|                         | intercept                        | 69.161                                                   | 106.517  | 5.16E-01 | -139.609 | 277.931 | -25.456                                                | 109.673  | 8.16E-01 | -240.411 | 189.499 | -63.428                                                | 102.485  | 5.36E-01 | -264.296 | 137.440 |
|                         | <i>apoba</i>                     | -0.102                                                   | 0.538    | 8.50E-01 | -1.157   | 0.953   | -0.007                                                 | 0.546    | 9.90E-01 | -1.076   | 1.063   | 0.098                                                  | 0.569    | 8.63E-01 | -1.017   | 1.214   |
| <i>apobb.2</i>          | 0.017                            | 0.337                                                    | 9.61E-01 | -0.644   | 0.678    | -0.223  | 0.379                                                  | 5.57E-01 | -0.965   | 0.520    | -0.055  | 0.374                                                  | 8.83E-01 | -0.788   | 0.677    |         |
| <i>ldlrB</i>            | -164.973                         | 266.850                                                  | 5.36E-01 | -687.989 | 358.042  | 73.008  | 274.916                                                | 7.91E-01 | -465.817 | 611.833  | 166.585 | 256.848                                                | 5.17E-01 | -336.827 | 669.997  |         |

continued Supplementary Table 21

|                         |                                  | apobb.1                                                |          |           |          |          |                                                        |          |           |          |          |                                                        |          |           |          |         |
|-------------------------|----------------------------------|--------------------------------------------------------|----------|-----------|----------|----------|--------------------------------------------------------|----------|-----------|----------|----------|--------------------------------------------------------|----------|-----------|----------|---------|
|                         |                                  | Vascular lipid deposition                              |          |           |          |          |                                                        |          |           |          |          |                                                        |          |           |          |         |
|                         |                                  | Model 1                                                |          |           |          |          | Model 2                                                |          |           |          |          | Model 3                                                |          |           |          |         |
|                         |                                  | 20 vs. 113 larvae with 2 vs. 0 mutated alleles (n=133) |          |           |          |          | 20 vs. 95 larvae with 2 vs. 0 mutated alleles (n=115)  |          |           |          |          | 20 vs. 95 larvae with 2 vs. 0 mutated alleles (n=115)  |          |           |          |         |
|                         |                                  | Effect                                                 | SE       | P         | lci      | uci      | Effect                                                 | SE       | P         | lci      | uci      | Effect                                                 | SE       | P         | lci      | uci     |
| negative binomial terms | 2 vs. 0 mutated alleles          | 1.765                                                  | 0.360    | 9.32E-07  | 1.060    | 2.470    | 2.914                                                  | 0.809    | 3.17E-04  | 1.328    | 4.499    | 2.482                                                  | 0.850    | 3.50E-03  | 0.816    | 4.147   |
|                         | <i>apoae</i>                     | -0.406                                                 | 0.264    | 1.24E-01  | -0.923   | 0.111    | -0.282                                                 | 0.331    | 3.95E-01  | -0.930   | 0.367    | -0.299                                                 | 0.339    | 3.78E-01  | -0.964   | 0.366   |
|                         | <i>apoeb</i>                     | 0.191                                                  | 0.190    | 3.14E-01  | -0.181   | 0.563    | 0.271                                                  | 0.230    | 2.40E-01  | -0.181   | 0.722    | 0.311                                                  | 0.247    | 2.07E-01  | -0.173   | 0.795   |
|                         | <i>ldlra</i>                     | 0.200                                                  | 0.174    | 2.51E-01  | -0.142   | 0.542    | 0.105                                                  | 0.193    | 5.88E-01  | -0.274   | 0.483    | 0.088                                                  | 0.199    | 6.59E-01  | -0.303   | 0.479   |
|                         | body length (in SD)              | -                                                      | -        | -         | -        | -        | 0.704                                                  | 0.296    | 1.74E-02  | 0.124    | 1.284    | 0.549                                                  | 0.337    | 1.03E-01  | -0.111   | 1.210   |
|                         | dorsal body surface area (in SD) | -                                                      | -        | -         | -        | -        | 0.510                                                  | 0.185    | 5.93E-03  | 0.147    | 0.874    | 0.425                                                  | 0.201    | 3.44E-02  | 0.031    | 0.819   |
|                         | LDL cholesterol levels (in SD)   | -                                                      | -        | -         | -        | -        | -                                                      | -        | -         | -        | -        | -0.051                                                 | 0.135    | 7.09E-01  | -0.316   | 0.215   |
|                         | HDL cholesterol levels (in SD)   | -                                                      | -        | -         | -        | -        | -                                                      | -        | -         | -        | -        | -0.147                                                 | 0.227    | 5.16E-01  | -0.593   | 0.298   |
|                         | triglyceride levels (in SD)      | -                                                      | -        | -         | -        | -        | -                                                      | -        | -         | -        | -        | 0.317                                                  | 0.203    | 1.19E-01  | -0.081   | 0.715   |
|                         | glucose levels (in SD)           | -                                                      | -        | -         | -        | -        | -                                                      | -        | -         | -        | -        | -0.060                                                 | 0.140    | 6.69E-01  | -0.333   | 0.214   |
|                         | time of day (in hours since 9AM) | -0.075                                                 | 0.114    | 5.09E-01  | -0.299   | 0.148    | -0.155                                                 | 0.148    | 2.96E-01  | -0.445   | 0.136    | -0.066                                                 | 0.171    | 6.98E-01  | -0.402   | 0.270   |
|                         | batch 2                          | -1.216                                                 | 0.674    | 7.13E-02  | -2.538   | 0.106    | -0.149                                                 | 0.900    | 8.68E-01  | -1.913   | 1.615    | -0.215                                                 | 0.960    | 8.23E-01  | -2.096   | 1.666   |
|                         | batch 3                          | -1.276                                                 | 0.499    | 1.06E-02  | -2.255   | -0.297   | -0.998                                                 | 0.595    | 9.38E-02  | -2.164   | 0.169    | -1.209                                                 | 0.651    | 6.32E-02  | -2.484   | 0.066   |
|                         | batch 4                          | -0.845                                                 | 0.467    | 7.07E-02  | -1.761   | 0.071    | -0.047                                                 | 0.624    | 9.40E-01  | -1.269   | 1.175    | -0.399                                                 | 0.722    | 5.80E-01  | -1.815   | 1.016   |
|                         | batch 5                          | -0.211                                                 | 0.387    | 5.85E-01  | -0.970   | 0.547    | -0.011                                                 | 0.561    | 9.85E-01  | -1.111   | 1.090    | -0.654                                                 | 0.712    | 3.59E-01  | -2.050   | 0.743   |
|                         | batch 6                          | -0.162                                                 | 0.381    | 6.70E-01  | -0.910   | 0.585    | -0.524                                                 | 0.419    | 2.11E-01  | -1.345   | 0.297    | -1.131                                                 | 0.595    | 5.72E-02  | -2.297   | 0.034   |
|                         | batch 7                          | -1.058                                                 | 0.462    | 2.19E-02  | -1.963   | -0.153   | -1.057                                                 | 0.544    | 5.19E-02  | -2.122   | 0.009    | -1.729                                                 | 0.830    | 3.72E-02  | -3.355   | -0.103  |
|                         | intercept                        | 183.351                                                | 148.640  | 2.17E-01  | -107.977 | 474.679  | 174.210                                                | 171.135  | 3.09E-01  | -161.209 | 509.629  | 131.729                                                | 171.727  | 4.43E-01  | -204.849 | 468.307 |
|                         | <i>apoba</i>                     | 0.954                                                  | 0.808    | 2.37E-01  | -0.629   | 2.537    | 0.769                                                  | 0.923    | 4.05E-01  | -1.040   | 2.577    | 0.695                                                  | 0.964    | 4.71E-01  | -1.195   | 2.584   |
|                         | <i>apobb.2</i>                   | -0.031                                                 | 0.473    | 9.48E-01  | -0.958   | 0.895    | -0.008                                                 | 0.509    | 9.88E-01  | -1.006   | 0.990    | 0.307                                                  | 0.554    | 5.80E-01  | -0.779   | 1.394   |
| <i>ldlrB</i>            | -450.568                         | 372.285                                                | 2.26E-01 | -1200.000 | 279.096  | -427.256 | 428.905                                                | 3.19E-01 | -1300.000 | 413.383  | -321.569 | 430.563                                                | 4.55E-01 | -1200.000 | 522.320  |         |
|                         |                                  | Vascular infiltration by macrophages                   |          |           |          |          |                                                        |          |           |          |          |                                                        |          |           |          |         |
|                         |                                  | 26 vs. 143 larvae with 2 vs. 0 mutated alleles (n=169) |          |           |          |          | 26 vs. 126 larvae with 2 vs. 0 mutated alleles (n=152) |          |           |          |          | 26 vs. 126 larvae with 2 vs. 0 mutated alleles (n=152) |          |           |          |         |
|                         |                                  | Effect                                                 | SE       | P         | lci      | uci      | Effect                                                 | SE       | P         | lci      | uci      | Effect                                                 | SE       | P         | lci      | uci     |
|                         |                                  |                                                        |          |           |          |          |                                                        |          |           |          |          |                                                        |          |           |          |         |
| fixed factors           | 2 vs. 0 mutated alleles          | -0.270                                                 | 0.214    | 2.08E-01  | -0.690   | 0.150    | -0.300                                                 | 0.255    | 2.39E-01  | -0.799   | 0.199    | -0.092                                                 | 0.264    | 7.28E-01  | -0.609   | 0.426   |
|                         | <i>apoae</i>                     | -0.110                                                 | 0.122    | 3.66E-01  | -0.350   | 0.129    | -0.178                                                 | 0.135    | 1.89E-01  | -0.443   | 0.087    | -0.229                                                 | 0.134    | 8.83E-02  | -0.492   | 0.034   |
|                         | <i>apoeb</i>                     | -0.089                                                 | 0.113    | 4.30E-01  | -0.311   | 0.132    | -0.098                                                 | 0.125    | 4.35E-01  | -0.343   | 0.148    | -0.143                                                 | 0.125    | 2.54E-01  | -0.387   | 0.102   |
|                         | <i>ldlra</i>                     | 0.067                                                  | 0.112    | 5.47E-01  | -0.152   | 0.286    | 0.086                                                  | 0.122    | 4.79E-01  | -0.153   | 0.326    | 0.104                                                  | 0.120    | 3.87E-01  | -0.132   | 0.340   |
|                         | body length (in SD)              | -                                                      | -        | -         | -        | -        | -0.046                                                 | 0.121    | 7.06E-01  | -0.284   | 0.192    | 0.010                                                  | 0.123    | 9.36E-01  | -0.231   | 0.251   |
|                         | dorsal body surface area (in SD) | -                                                      | -        | -         | -        | -        | -0.194                                                 | 0.098    | 4.73E-02  | -0.386   | -0.002   | -0.157                                                 | 0.100    | 1.16E-01  | -0.352   | 0.039   |
|                         | LDL cholesterol levels (in SD)   | -                                                      | -        | -         | -        | -        | -                                                      | -        | -         | -        | -        | 0.120                                                  | 0.085    | 1.57E-01  | -0.046   | 0.286   |
|                         | HDL cholesterol levels (in SD)   | -                                                      | -        | -         | -        | -        | -                                                      | -        | -         | -        | -        | 0.055                                                  | 0.101    | 5.87E-01  | -0.144   | 0.254   |
|                         | triglyceride levels (in SD)      | -                                                      | -        | -         | -        | -        | -                                                      | -        | -         | -        | -        | -0.258                                                 | 0.117    | 2.79E-02  | -0.488   | -0.028  |
|                         | glucose levels (in SD)           | -                                                      | -        | -         | -        | -        | -                                                      | -        | -         | -        | -        | 0.063                                                  | 0.088    | 4.76E-01  | -0.110   | 0.236   |
|                         | time of day (in hours since 9AM) | 0.103                                                  | 0.063    | 1.01E-01  | -0.020   | 0.225    | 0.117                                                  | 0.069    | 9.19E-02  | -0.019   | 0.253    | 0.068                                                  | 0.069    | 3.23E-01  | -0.067   | 0.203   |
|                         | intercept_random                 | 11.258                                                 | 88.626   | 8.99E-01  | -162.446 | 184.962  | -2.079                                                 | 99.580   | 9.83E-01  | -197.253 | 193.094  | 1.267                                                  | 98.915   | 9.90E-01  | -192.603 | 195.136 |
|                         | <i>apoba</i>                     | -0.485                                                 | 0.450    | 2.81E-01  | -1.367   | 0.397    | -0.542                                                 | 0.478    | 2.58E-01  | -1.479   | 0.396    | -0.539                                                 | 0.470    | 2.51E-01  | -1.460   | 0.382   |
|                         | <i>apobb.2</i>                   | -0.189                                                 | 0.269    | 4.82E-01  | -0.715   | 0.337    | -0.389                                                 | 0.303    | 1.99E-01  | -0.983   | 0.204    | -0.606                                                 | 0.314    | 5.36E-02  | -1.221   | 0.010   |
| <i>ldlrB</i>            | -24.951                          | 221.876                                                | 9.10E-01 | -459.821  | 409.919  | 9.325    | 249.131                                                | 9.70E-01 | -478.963  | 497.613  | 2.196    | 247.481                                                | 9.93E-01 | -482.857  | 487.250  |         |
| random factors          | <i>variance by batch</i>         | 0.574                                                  | 0.172    | -         | 0.319    | 1.031    | 0.490                                                  | 0.173    | -         | 0.245    | 0.980    | 0.366                                                  | 0.143    | -         | 0.170    | 0.787   |
|                         | <i>residual</i>                  | 0.899                                                  | 0.050    | -         | 0.805    | 1.003    | 0.931                                                  | 0.055    | -         | 0.828    | 1.046    | 0.918                                                  | 0.055    | -         | 0.817    | 1.031   |

continued Supplementary Table 21

|                         |                                  | Vascular co-localization of lipids with macrophages    |          |          |          |          |                                                        |          |           |          |          |                                                        |          |           |          |         |
|-------------------------|----------------------------------|--------------------------------------------------------|----------|----------|----------|----------|--------------------------------------------------------|----------|-----------|----------|----------|--------------------------------------------------------|----------|-----------|----------|---------|
|                         |                                  | 20 vs. 108 larvae with 2 vs. 0 mutated alleles (n=128) |          |          |          |          | 20 vs. 92 larvae with 2 vs. 0 mutated alleles (n=112)  |          |           |          |          | 20 vs. 92 larvae with 2 vs. 0 mutated alleles (n=112)  |          |           |          |         |
|                         |                                  | Effect                                                 | SE       | P        | lci      | uci      | Effect                                                 | SE       | P         | lci      | uci      | Effect                                                 | SE       | P         | lci      | uci     |
| negative binomial terms | 2 vs. 0 mutated alleles          | 2.295                                                  | 0.547    | 2.72E-05 | 1.223    | 3.367    | 4.048                                                  | 1.068    | 1.50E-04  | 1.956    | 6.141    | 3.351                                                  | 1.013    | 9.44E-04  | 1.365    | 5.337   |
|                         | <i>apoea</i>                     | -0.269                                                 | 0.419    | 5.21E-01 | -1.089   | 0.552    | -0.374                                                 | 0.514    | 4.66E-01  | -1.381   | 0.632    | -0.199                                                 | 0.538    | 7.12E-01  | -1.253   | 0.856   |
|                         | <i>apoeb</i>                     | -0.236                                                 | 0.256    | 3.57E-01 | -0.738   | 0.266    | -0.311                                                 | 0.283    | 2.72E-01  | -0.867   | 0.244    | -0.408                                                 | 0.276    | 1.40E-01  | -0.950   | 0.133   |
|                         | <i>ldlra</i>                     | 0.360                                                  | 0.208    | 8.28E-02 | -0.047   | 0.767    | 0.256                                                  | 0.220    | 2.45E-01  | -0.175   | 0.686    | 0.408                                                  | 0.233    | 7.91E-02  | -0.047   | 0.864   |
|                         | body length (in SD)              | -                                                      | -        | -        | -        | -        | 1.231                                                  | 0.470    | 8.75E-03  | 0.311    | 2.151    | 1.121                                                  | 0.485    | 2.08E-02  | 0.170    | 2.071   |
|                         | dorsal body surface area (in SD) | -                                                      | -        | -        | -        | -        | 0.847                                                  | 0.259    | 1.07E-03  | 0.339    | 1.354    | 0.792                                                  | 0.300    | 8.21E-03  | 0.205    | 1.380   |
|                         | LDL cholesterol levels (in SD)   | -                                                      | -        | -        | -        | -        | -                                                      | -        | -         | -        | -        | -0.363                                                 | 0.280    | 1.95E-01  | -0.911   | 0.186   |
|                         | HDL cholesterol levels (in SD)   | -                                                      | -        | -        | -        | -        | -                                                      | -        | -         | -        | -        | -0.033                                                 | 0.288    | 9.10E-01  | -0.597   | 0.532   |
|                         | triglyceride levels (in SD)      | -                                                      | -        | -        | -        | -        | -                                                      | -        | -         | -        | -        | 0.096                                                  | 0.427    | 8.22E-01  | -0.741   | 0.932   |
|                         | glucose levels (in SD)           | -                                                      | -        | -        | -        | -        | -                                                      | -        | -         | -        | -        | -0.232                                                 | 0.248    | 3.50E-01  | -0.718   | 0.254   |
|                         | time of day (in hours since 9AM) | 0.215                                                  | 0.148    | 1.48E-01 | -0.076   | 0.505    | 0.313                                                  | 0.164    | 5.67E-02  | -0.009   | 0.634    | 0.437                                                  | 0.176    | 1.29E-02  | 0.092    | 0.782   |
|                         | batch 2                          | 0.570                                                  | 1.135    | 6.16E-01 | -1.655   | 2.795    | 1.855                                                  | 1.345    | 1.68E-01  | -0.782   | 4.491    | 1.208                                                  | 1.298    | 3.52E-01  | -1.337   | 3.753   |
|                         | batch 3                          | -1.739                                                 | 0.589    | 3.14E-03 | -2.893   | -0.585   | -1.631                                                 | 0.721    | 2.37E-02  | -3.045   | -0.218   | -1.931                                                 | 0.799    | 1.57E-02  | -3.498   | -0.364  |
|                         | batch 4                          | -0.373                                                 | 0.601    | 5.35E-01 | -1.550   | 0.805    | 0.295                                                  | 0.854    | 7.30E-01  | -1.379   | 1.968    | 0.269                                                  | 0.934    | 7.73E-01  | -1.561   | 2.099   |
|                         | batch 5                          | -0.139                                                 | 0.595    | 8.16E-01 | -1.306   | 1.028    | -0.859                                                 | 0.762    | 2.60E-01  | -2.353   | 0.635    | -0.795                                                 | 0.879    | 3.66E-01  | -2.518   | 0.928   |
|                         | batch 6                          | -0.716                                                 | 0.577    | 2.14E-01 | -1.846   | 0.414    | -2.288                                                 | 0.702    | 1.12E-03  | -3.664   | -0.912   | -2.405                                                 | 1.136    | 3.43E-02  | -4.631   | -0.178  |
|                         | batch 7                          | -0.845                                                 | 0.788    | 2.84E-01 | -2.390   | 0.701    | -2.164                                                 | 0.826    | 8.77E-03  | -3.782   | -0.546   | -2.372                                                 | 1.171    | 4.27E-02  | -4.667   | -0.078  |
|                         | intercept                        | 108.949                                                | 133.134  | 4.13E-01 | -151.988 | 369.886  | 105.728                                                | 213.116  | 6.20E-01  | -311.971 | 523.427  | 251.845                                                | 259.958  | 3.33E-01  | -257.664 | 761.353 |
|                         | <i>apoba</i>                     | -0.919                                                 | 1.185    | 4.38E-01 | -3.242   | 1.405    | -0.768                                                 | 1.116    | 4.92E-01  | -2.956   | 1.420    | -0.610                                                 | 1.095    | 5.77E-01  | -2.757   | 1.536   |
|                         | <i>apobb.2</i>                   | 0.031                                                  | 0.591    | 9.59E-01 | -1.127   | 1.188    | 0.132                                                  | 0.639    | 8.36E-01  | -1.121   | 1.385    | 0.210                                                  | 0.725    | 7.73E-01  | -1.212   | 1.631   |
| <i>ldlrB</i>            | -263.818                         | 334.248                                                | 4.30E-01 | -918.933 | 391.296  | -256.522 | 532.363                                                | 6.30E-01 | -1300.000 | 786.891  | -623.857 | 649.781                                                | 3.37E-01 | -1900.000 | 649.691  |         |
|                         |                                  | Vascular infiltration by neutrophils                   |          |          |          |          |                                                        |          |           |          |          |                                                        |          |           |          |         |
|                         |                                  | 26 vs. 147 larvae with 2 vs. 0 mutated alleles (n=173) |          |          |          |          | 26 vs. 129 larvae with 2 vs. 0 mutated alleles (n=155) |          |           |          |          | 26 vs. 129 larvae with 2 vs. 0 mutated alleles (n=155) |          |           |          |         |
|                         |                                  | Effect                                                 | SE       | P        | lci      | uci      | Effect                                                 | SE       | P         | lci      | uci      | Effect                                                 | SE       | P         | lci      | uci     |
| fixed factors           | 2 vs. 0 mutated alleles          | 0.428                                                  | 0.206    | 3.77E-02 | 0.024    | 0.832    | 0.281                                                  | 0.235    | 2.31E-01  | -0.179   | 0.742    | 0.466                                                  | 0.245    | 5.72E-02  | -0.014   | 0.947   |
|                         | <i>apoea</i>                     | -0.152                                                 | 0.116    | 1.92E-01 | -0.380   | 0.076    | -0.217                                                 | 0.124    | 8.05E-02  | -0.460   | 0.026    | -0.236                                                 | 0.124    | 5.78E-02  | -0.479   | 0.008   |
|                         | <i>apoeb</i>                     | 0.008                                                  | 0.108    | 9.40E-01 | -0.204   | 0.220    | 0.021                                                  | 0.115    | 8.58E-01  | -0.205   | 0.247    | -0.014                                                 | 0.116    | 9.05E-01  | -0.241   | 0.213   |
|                         | <i>ldlra</i>                     | -0.088                                                 | 0.107    | 4.10E-01 | -0.297   | 0.121    | -0.042                                                 | 0.112    | 7.08E-01  | -0.261   | 0.177    | -0.019                                                 | 0.111    | 8.62E-01  | -0.237   | 0.198   |
|                         | body length (in SD)              | -                                                      | -        | -        | -        | -        | -0.112                                                 | 0.110    | 3.08E-01  | -0.328   | 0.103    | -0.061                                                 | 0.112    | 5.89E-01  | -0.280   | 0.159   |
|                         | dorsal body surface area (in SD) | -                                                      | -        | -        | -        | -        | 0.040                                                  | 0.089    | 6.53E-01  | -0.135   | 0.215    | 0.074                                                  | 0.092    | 4.19E-01  | -0.105   | 0.253   |
|                         | LDL cholesterol levels (in SD)   | -                                                      | -        | -        | -        | -        | -                                                      | -        | -         | -        | -        | 0.054                                                  | 0.076    | 4.76E-01  | -0.095   | 0.204   |
|                         | HDL cholesterol levels (in SD)   | -                                                      | -        | -        | -        | -        | -                                                      | -        | -         | -        | -        | 0.049                                                  | 0.094    | 6.02E-01  | -0.135   | 0.232   |
|                         | triglyceride levels (in SD)      | -                                                      | -        | -        | -        | -        | -                                                      | -        | -         | -        | -        | -0.186                                                 | 0.107    | 8.18E-02  | -0.395   | 0.023   |
|                         | glucose levels (in SD)           | -                                                      | -        | -        | -        | -        | -                                                      | -        | -         | -        | -        | 0.122                                                  | 0.082    | 1.34E-01  | -0.038   | 0.282   |
|                         | time of day (in hours since 9AM) | 0.029                                                  | 0.059    | 6.29E-01 | -0.088   | 0.145    | 0.017                                                  | 0.064    | 7.95E-01  | -0.108   | 0.141    | -0.015                                                 | 0.064    | 8.14E-01  | -0.140   | 0.110   |
|                         | intercept_random                 | -182.126                                               | 85.408   | 3.30E-02 | -349.522 | -14.729  | -203.375                                               | 92.181   | 2.74E-02  | -384.047 | -22.702  | -198.131                                               | 92.230   | 3.17E-02  | -378.899 | -17.363 |
|                         | <i>apoba</i>                     | 0.233                                                  | 0.431    | 5.89E-01 | -0.612   | 1.078    | 0.169                                                  | 0.441    | 7.02E-01  | -0.695   | 1.033    | 0.163                                                  | 0.436    | 7.09E-01  | -0.693   | 1.018   |
|                         | <i>apobb.2</i>                   | 0.004                                                  | 0.259    | 9.87E-01 | -0.503   | 0.511    | 0.142                                                  | 0.280    | 6.12E-01  | -0.407   | 0.692    | 0.045                                                  | 0.292    | 8.77E-01  | -0.527   | 0.617   |
|                         | <i>ldlrB</i>                     | 454.749                                                | 213.818  | 3.34E-02 | 35.674   | 873.823  | 507.788                                                | 230.619  | 2.77E-02  | 55.782   | 959.793  | 495.311                                                | 230.758  | 3.18E-02  | 43.035   | 947.588 |
| random factors          | <i>variance by batch</i>         | 0.468                                                  | 0.142    | -        | 0.258    | 0.850    | 0.407                                                  | 0.140    | -         | 0.207    | 0.798    | 0.308                                                  | 0.126    | -         | 0.138    | 0.686   |
|                         | <i>residual</i>                  | 0.867                                                  | 0.048    | -        | 0.778    | 0.966    | 0.862                                                  | 0.051    | -         | 0.769    | 0.967    | 0.856                                                  | 0.050    | -         | 0.763    | 0.961   |



continued Supplementary Table 21

|                                         | Vascular co-localization of lipids with neutrophils    |          |          |           |          |                                                       |          |          |           |          |                                                       |          |          |           |          |
|-----------------------------------------|--------------------------------------------------------|----------|----------|-----------|----------|-------------------------------------------------------|----------|----------|-----------|----------|-------------------------------------------------------|----------|----------|-----------|----------|
|                                         | 19 vs. 106 larvae with 2 vs. 0 mutated alleles (n=125) |          |          |           |          | 19 vs. 89 larvae with 2 vs. 0 mutated alleles (n=108) |          |          |           |          | 19 vs. 89 larvae with 2 vs. 0 mutated alleles (n=108) |          |          |           |          |
|                                         | Effect                                                 | SE       | P        | lci       | uci      | Effect                                                | SE       | P        | lci       | uci      | Effect                                                | SE       | P        | lci       | uci      |
| <b>2 vs. 0 mutated alleles</b>          | 4.082                                                  | 0.541    | 4.44E-14 | 3.022     | 5.142    | 6.315                                                 | 1.281    | 8.31E-07 | 3.803     | 8.826    | 7.962                                                 | 1.975    | 5.54E-05 | 4.091     | 11.833   |
| <i>apoea</i>                            | -1.717                                                 | 0.466    | 2.28E-04 | -2.630    | -0.804   | -1.992                                                | 0.694    | 4.13E-03 | -3.353    | -0.631   | -1.881                                                | 0.797    | 1.82E-02 | -3.443    | -0.320   |
| <i>apoeb</i>                            | -0.611                                                 | 0.382    | 1.09E-01 | -1.359    | 0.137    | -0.545                                                | 0.503    | 2.79E-01 | -1.531    | 0.441    | 0.150                                                 | 0.569    | 7.92E-01 | -0.964    | 1.264    |
| <i>ldlra</i>                            | 0.031                                                  | 0.290    | 9.15E-01 | -0.538    | 0.599    | 0.112                                                 | 0.288    | 6.98E-01 | -0.453    | 0.677    | -0.199                                                | 0.375    | 5.96E-01 | -0.933    | 0.536    |
| <b>body length (in SD)</b>              | -                                                      | -        | -        | -         | -        | 1.422                                                 | 0.684    | 3.75E-02 | 0.082     | 2.763    | 1.521                                                 | 0.820    | 6.37E-02 | -0.087    | 3.128    |
| <b>dorsal body surface area (in SD)</b> | -                                                      | -        | -        | -         | -        | -0.259                                                | 0.340    | 4.46E-01 | -0.925    | 0.407    | -0.435                                                | 0.374    | 2.45E-01 | -1.169    | 0.298    |
| <b>LDL cholesterol levels (in SD)</b>   | -                                                      | -        | -        | -         | -        | -                                                     | -        | -        | -         | -        | 0.411                                                 | 0.337    | 2.22E-01 | -0.249    | 1.071    |
| <b>HDL cholesterol levels (in SD)</b>   | -                                                      | -        | -        | -         | -        | -                                                     | -        | -        | -         | -        | -0.177                                                | 0.558    | 7.51E-01 | -1.272    | 0.917    |
| <b>triglyceride levels (in SD)</b>      | -                                                      | -        | -        | -         | -        | -                                                     | -        | -        | -         | -        | -0.144                                                | 0.616    | 8.15E-01 | -1.352    | 1.063    |
| <b>glucose levels (in SD)</b>           | -                                                      | -        | -        | -         | -        | -                                                     | -        | -        | -         | -        | 1.340                                                 | 0.467    | 4.13E-03 | 0.424     | 2.256    |
| <b>time of day (in hours since 9AM)</b> | -0.506                                                 | 0.180    | 5.00E-03 | -0.860    | -0.153   | -0.598                                                | 0.315    | 5.76E-02 | -1.215    | 0.019    | -0.547                                                | 0.350    | 1.19E-01 | -1.233    | 0.140    |
| <b>batch 2</b>                          | -3.868                                                 | 1.152    | 7.90E-04 | -6.126    | -1.609   | -3.200                                                | 1.213    | 8.33E-03 | -5.577    | -0.823   | -0.841                                                | 1.754    | 6.32E-01 | -4.278    | 2.596    |
| <b>batch 3</b>                          | -1.358                                                 | 0.854    | 1.12E-01 | -3.033    | 0.316    | -1.330                                                | 0.923    | 1.49E-01 | -3.138    | 0.478    | -1.396                                                | 1.122    | 2.14E-01 | -3.596    | 0.804    |
| <b>batch 4</b>                          | -1.785                                                 | 0.808    | 2.72E-02 | -3.369    | -0.201   | -1.256                                                | 0.998    | 2.08E-01 | -3.212    | 0.700    | -1.802                                                | 1.075    | 9.37E-02 | -3.909    | 0.305    |
| <b>batch 5</b>                          | -1.321                                                 | 0.655    | 4.36E-02 | -2.604    | -0.038   | -1.559                                                | 0.883    | 7.76E-02 | -3.290    | 0.173    | -1.916                                                | 1.500    | 2.02E-01 | -4.855    | 1.024    |
| <b>batch 6</b>                          | -3.031                                                 | 0.662    | 4.74E-06 | -4.329    | -1.733   | -2.775                                                | 0.935    | 2.99E-03 | -4.607    | -0.943   | -2.871                                                | 1.403    | 4.08E-02 | -5.621    | -0.121   |
| <b>intercept</b>                        | -214.663                                               | 420.786  | 6.10E-01 | -1000.000 | 610.062  | -472.077                                              | 522.037  | 3.66E-01 | -1500.000 | 551.098  | -942.198                                              | 584.076  | 1.07E-01 | -2100.000 | 202.571  |
| <i>apoba</i>                            | 3.615                                                  | 1.392    | 9.41E-03 | 0.886     | 6.343    | 3.721                                                 | 1.556    | 1.68E-02 | 0.671     | 6.771    | 4.649                                                 | 2.299    | 4.31E-02 | 0.144     | 9.154    |
| <i>apobb.2</i>                          | 0.569                                                  | 0.805    | 4.79E-01 | -1.008    | 2.146    | 0.248                                                 | 0.958    | 7.96E-01 | -1.629    | 2.125    | 1.111                                                 | 1.180    | 3.46E-01 | -1.202    | 3.425    |
| <i>ldlrB</i>                            | 530.344                                                | 1051.605 | 6.14E-01 | -1500.000 | 2591.452 | 1174.217                                              | 1307.275 | 3.69E-01 | -1400.000 | 3736.429 | 2338.624                                              | 1464.591 | 1.10E-01 | -531.921  | 5209.169 |

|                                         | Vascular co-localization of macrophages with neutrophils |         |          |          |         |                                                        |         |          |          |         |                                                        |         |          |          |          |
|-----------------------------------------|----------------------------------------------------------|---------|----------|----------|---------|--------------------------------------------------------|---------|----------|----------|---------|--------------------------------------------------------|---------|----------|----------|----------|
|                                         | 26 vs. 143 larvae with 2 vs. 0 mutated alleles (n=169)   |         |          |          |         | 26 vs. 126 larvae with 2 vs. 0 mutated alleles (n=152) |         |          |          |         | 26 vs. 126 larvae with 2 vs. 0 mutated alleles (n=152) |         |          |          |          |
|                                         | Effect                                                   | SE      | P        | lci      | uci     | Effect                                                 | SE      | P        | lci      | uci     | Effect                                                 | SE      | P        | lci      | uci      |
| <b>2 vs. 0 mutated alleles</b>          | 0.080                                                    | 0.279   | 7.73E-01 | -0.467   | 0.628   | 0.002                                                  | 0.312   | 9.96E-01 | -0.609   | 0.613   | 0.101                                                  | 0.328   | 7.58E-01 | -0.542   | 0.743    |
| <i>apoea</i>                            | -0.230                                                   | 0.158   | 1.45E-01 | -0.540   | 0.080   | -0.287                                                 | 0.172   | 9.53E-02 | -0.624   | 0.050   | -0.435                                                 | 0.181   | 1.63E-02 | -0.790   | -0.080   |
| <i>apoeb</i>                            | -0.011                                                   | 0.149   | 9.41E-01 | -0.302   | 0.280   | -0.040                                                 | 0.162   | 8.03E-01 | -0.359   | 0.278   | -0.066                                                 | 0.156   | 6.72E-01 | -0.371   | 0.239    |
| <i>ldlra</i>                            | -0.041                                                   | 0.137   | 7.66E-01 | -0.310   | 0.228   | -0.042                                                 | 0.132   | 7.52E-01 | -0.301   | 0.218   | 0.047                                                  | 0.132   | 7.21E-01 | -0.212   | 0.307    |
| <b>body length (in SD)</b>              | -                                                        | -       | -        | -        | -       | -0.026                                                 | 0.165   | 8.73E-01 | -0.350   | 0.297   | -0.019                                                 | 0.201   | 9.23E-01 | -0.414   | 0.375    |
| <b>dorsal body surface area (in SD)</b> | -                                                        | -       | -        | -        | -       | 0.123                                                  | 0.142   | 3.86E-01 | -0.155   | 0.401   | 0.103                                                  | 0.150   | 4.92E-01 | -0.191   | 0.397    |
| <b>LDL cholesterol levels (in SD)</b>   | -                                                        | -       | -        | -        | -       | -                                                      | -       | -        | -        | -       | 0.012                                                  | 0.143   | 9.35E-01 | -0.268   | 0.292    |
| <b>HDL cholesterol levels (in SD)</b>   | -                                                        | -       | -        | -        | -       | -                                                      | -       | -        | -        | -       | -0.166                                                 | 0.147   | 2.60E-01 | -0.454   | 0.122    |
| <b>triglyceride levels (in SD)</b>      | -                                                        | -       | -        | -        | -       | -                                                      | -       | -        | -        | -       | -0.284                                                 | 0.219   | 1.95E-01 | -0.714   | 0.145    |
| <b>glucose levels (in SD)</b>           | -                                                        | -       | -        | -        | -       | -                                                      | -       | -        | -        | -       | 0.304                                                  | 0.112   | 6.68E-03 | 0.084    | 0.524    |
| <b>time of day (in hours since 9AM)</b> | 0.253                                                    | 0.079   | 1.25E-03 | 0.099    | 0.407   | 0.235                                                  | 0.086   | 6.31E-03 | 0.066    | 0.404   | 0.185                                                  | 0.093   | 4.62E-02 | 0.003    | 0.367    |
| <b>batch 1</b>                          | -0.542                                                   | 0.505   | 2.83E-01 | -1.533   | 0.448   | -0.413                                                 | 0.576   | 4.74E-01 | -1.542   | 0.717   | -0.276                                                 | 0.782   | 7.24E-01 | -1.809   | 1.257    |
| <b>batch 2</b>                          | -0.959                                                   | 0.494   | 5.22E-02 | -1.927   | 0.009   | -1.027                                                 | 0.525   | 5.05E-02 | -2.057   | 0.002   | -0.697                                                 | 0.619   | 2.60E-01 | -1.910   | 0.515    |
| <b>batch 3</b>                          | -1.403                                                   | 0.500   | 4.99E-03 | -2.383   | -0.424  | -1.360                                                 | 0.508   | 7.39E-03 | -2.354   | -0.365  | -1.238                                                 | 0.639   | 5.27E-02 | -2.489   | 0.014    |
| <b>batch 4</b>                          | 0.258                                                    | 0.523   | 6.23E-01 | -0.768   | 1.284   | 0.275                                                  | 0.520   | 5.96E-01 | -0.743   | 1.294   | 0.232                                                  | 0.632   | 7.13E-01 | -1.007   | 1.471    |
| <b>batch 5</b>                          | -0.934                                                   | 0.444   | 3.53E-02 | -1.804   | -0.064  | -1.058                                                 | 0.501   | 3.46E-02 | -2.040   | -0.076  | -0.619                                                 | 0.603   | 3.04E-01 | -1.800   | 0.562    |
| <b>batch 6</b>                          | -2.488                                                   | 0.504   | 7.97E-07 | -3.476   | -1.500  | -2.571                                                 | 0.611   | 2.54E-05 | -3.767   | -1.374  | -2.227                                                 | 0.664   | 8.01E-04 | -3.529   | -0.925   |
| <b>batch 7</b>                          | -2.134                                                   | 0.793   | 7.15E-03 | -3.689   | -0.579  | -2.135                                                 | 0.849   | 1.19E-02 | -3.799   | -0.471  | -2.588                                                 | 1.027   | 1.17E-02 | -4.600   | -0.575   |
| <b>intercept</b>                        | -185.934                                                 | 104.046 | 7.39E-02 | -389.861 | 17.993  | -142.067                                               | 123.760 | 2.51E-01 | -384.633 | 100.498 | -147.810                                               | 126.894 | 2.44E-01 | -396.517 | 100.898  |
| <i>apoba</i>                            | -0.090                                                   | 0.607   | 8.82E-01 | -1.281   | 1.100   | 0.110                                                  | 0.598   | 8.54E-01 | -1.063   | 1.282   | 0.303                                                  | 0.577   | 5.99E-01 | -0.827   | 1.434    |
| <i>apobb.2</i>                          | -0.339                                                   | 0.366   | 3.55E-01 | -1.056   | 0.379   | -0.520                                                 | 0.407   | 2.02E-01 | -1.318   | 0.279   | -0.419                                                 | 0.388   | 2.79E-01 | -1.179   | 0.340    |
| <i>ldlrB</i>                            | 477.129                                                  | 261.076 | 6.76E-02 | -34.570  | 988.829 | 367.600                                                | 310.089 | 2.36E-01 | -240.163 | 975.364 | 380.686                                                | 317.971 | 2.31E-01 | -242.525 | 1003.897 |

continued Supplementary Table 21

|                         |                                  | <i>ldlra</i>                                            |          |           |        |          |                                                         |          |           |         |          |                                                         |          |           |         |         |
|-------------------------|----------------------------------|---------------------------------------------------------|----------|-----------|--------|----------|---------------------------------------------------------|----------|-----------|---------|----------|---------------------------------------------------------|----------|-----------|---------|---------|
|                         |                                  | Vascular lipid deposition                               |          |           |        |          |                                                         |          |           |         |          |                                                         |          |           |         |         |
|                         |                                  | Model 1                                                 |          |           |        |          | Model 2                                                 |          |           |         |          | Model 3                                                 |          |           |         |         |
|                         |                                  | 130 vs. 90 larvae with 2 vs. 0 mutated alleles (n=220)  |          |           |        |          | 117 vs. 80 larvae with 2 vs. 0 mutated alleles (n=197)  |          |           |         |          | 117 vs. 80 larvae with 2 vs. 0 mutated alleles (n=197)  |          |           |         |         |
|                         |                                  | Effect                                                  | SE       | P         | lci    | uci      | Effect                                                  | SE       | P         | lci     | uci      | Effect                                                  | SE       | P         | lci     | uci     |
| negative binomial terms | 2 vs. 0 mutated alleles          | 0.111                                                   | 0.251    | 6.58E-01  | -0.381 | 0.603    | 0.104                                                   | 0.266    | 6.97E-01  | -0.418  | 0.626    | 0.073                                                   | 0.275    | 7.91E-01  | -0.466  | 0.612   |
|                         | <i>apoea</i>                     | -0.189                                                  | 0.195    | 3.32E-01  | -0.571 | 0.193    | -0.183                                                  | 0.212    | 3.89E-01  | -0.598  | 0.233    | -0.172                                                  | 0.209    | 4.10E-01  | -0.582  | 0.238   |
|                         | <i>apoeb</i>                     | 0.308                                                   | 0.164    | 6.09E-02  | -0.014 | 0.629    | 0.394                                                   | 0.186    | 3.46E-02  | 0.029   | 0.759    | 0.392                                                   | 0.191    | 4.03E-02  | 0.017   | 0.768   |
|                         | <i>apobb.1</i>                   | 0.996                                                   | 0.161    | 5.70E-10  | 0.681  | 1.310    | 0.937                                                   | 0.198    | 2.13E-06  | 0.549   | 1.324    | 0.898                                                   | 0.210    | 1.91E-05  | 0.486   | 1.310   |
|                         | body length (in SD)              | -                                                       | -        | -         | -      | -        | -0.071                                                  | 0.167    | 6.70E-01  | -0.398  | 0.256    | -0.041                                                  | 0.175    | 8.16E-01  | -0.384  | 0.302   |
|                         | dorsal body surface area (in SD) | -                                                       | -        | -         | -      | -        | 0.197                                                   | 0.141    | 1.63E-01  | -0.080  | 0.474    | 0.213                                                   | 0.145    | 1.43E-01  | -0.072  | 0.498   |
|                         | LDL cholesterol levels (in SD)   | -                                                       | -        | -         | -      | -        | -                                                       | -        | -         | -       | -        | -0.015                                                  | 0.107    | 8.85E-01  | -0.225  | 0.194   |
|                         | HDL cholesterol levels (in SD)   | -                                                       | -        | -         | -      | -        | -                                                       | -        | -         | -       | -        | -0.045                                                  | 0.144    | 7.53E-01  | -0.327  | 0.237   |
|                         | triglyceride levels (in SD)      | -                                                       | -        | -         | -      | -        | -                                                       | -        | -         | -       | -        | 0.140                                                   | 0.178    | 4.33E-01  | -0.209  | 0.489   |
|                         | glucose levels (in SD)           | -                                                       | -        | -         | -      | -        | -                                                       | -        | -         | -       | -        | -0.042                                                  | 0.121    | 7.30E-01  | -0.279  | 0.195   |
|                         | time of day (in hours since 9AM) | -0.062                                                  | 0.094    | 5.07E-01  | -0.246 | 0.122    | -0.107                                                  | 0.117    | 3.60E-01  | -0.335  | 0.122    | -0.086                                                  | 0.118    | 4.66E-01  | -0.318  | 0.146   |
|                         | batch 2                          | -1.659                                                  | 0.483    | 5.94E-04  | -2.606 | -0.712   | -1.871                                                  | 0.575    | 1.13E-03  | -2.998  | -0.745   | -1.705                                                  | 0.605    | 4.79E-03  | -2.890  | -0.520  |
|                         | batch 3                          | -0.467                                                  | 0.382    | 2.21E-01  | -1.216 | 0.282    | -0.569                                                  | 0.399    | 1.54E-01  | -1.351  | 0.213    | -0.644                                                  | 0.442    | 1.45E-01  | -1.509  | 0.222   |
|                         | batch 4                          | -0.714                                                  | 0.416    | 8.63E-02  | -1.529 | 0.102    | -0.820                                                  | 0.449    | 6.77E-02  | -1.699  | 0.060    | -0.818                                                  | 0.467    | 8.02E-02  | -1.734  | 0.098   |
|                         | batch 5                          | 0.372                                                   | 0.321    | 2.46E-01  | -0.257 | 1.001    | 0.208                                                   | 0.367    | 5.72E-01  | -0.512  | 0.928    | -0.019                                                  | 0.503    | 9.70E-01  | -1.005  | 0.967   |
|                         | batch 6                          | 0.156                                                   | 0.281    | 5.80E-01  | -0.395 | 0.707    | 0.092                                                   | 0.318    | 7.72E-01  | -0.531  | 0.716    | -0.232                                                  | 0.535    | 6.64E-01  | -1.281  | 0.816   |
|                         | batch 7                          | -0.554                                                  | 0.363    | 1.27E-01  | -1.266 | 0.157    | -0.730                                                  | 0.377    | 5.27E-02  | -1.468  | 0.008    | -0.959                                                  | 0.554    | 8.37E-02  | -2.046  | 0.128   |
|                         | intercept                        | 280.829                                                 | 147.422  | 5.68E-02  | -8.113 | 569.772  | 320.998                                                 | 153.007  | 3.59E-02  | 21.110  | 620.886  | 319.158                                                 | 154.393  | 3.87E-02  | 16.554  | 621.762 |
|                         | <i>apoba</i>                     | -0.166                                                  | 0.630    | 7.92E-01  | -1.401 | 1.069    | -0.357                                                  | 0.644    | 5.79E-01  | -1.619  | 0.905    | -0.211                                                  | 0.668    | 7.52E-01  | -1.520  | 1.098   |
|                         | <i>apobb.2</i>                   | -0.046                                                  | 0.404    | 9.10E-01  | -0.837 | 0.746    | -0.138                                                  | 0.409    | 7.36E-01  | -0.940  | 0.665    | -0.060                                                  | 0.419    | 8.86E-01  | -0.881  | 0.761   |
| <i>ldlr</i>             | -690.958                         | 368.791                                                 | 6.10E-02 | -1400.000 | 31.859 | -789.795 | 382.814                                                 | 3.91E-02 | -1500.000 | -39.493 | -785.887 | 386.208                                                 | 4.19E-02 | -1500.000 | -28.933 |         |
|                         |                                  | Vascular infiltration by macrophages                    |          |           |        |          |                                                         |          |           |         |          |                                                         |          |           |         |         |
|                         |                                  | 174 vs. 117 larvae with 2 vs. 0 mutated alleles (n=291) |          |           |        |          | 158 vs. 102 larvae with 2 vs. 0 mutated alleles (n=260) |          |           |         |          | 158 vs. 102 larvae with 2 vs. 0 mutated alleles (n=260) |          |           |         |         |
|                         |                                  | Effect                                                  | SE       | P         | lci    | uci      | Effect                                                  | SE       | P         | lci     | uci      | Effect                                                  | SE       | P         | lci     | uci     |
| fixed factors           | 2 vs. 0 mutated alleles          | 0.077                                                   | 0.136    | 5.70E-01  | -0.189 | 0.343    | 0.029                                                   | 0.152    | 8.50E-01  | -0.269  | 0.327    | 0.000                                                   | 0.152    | 1.00E+00  | -0.297  | 0.297   |
|                         | <i>apoea</i>                     | -0.126                                                  | 0.087    | 1.48E-01  | -0.297 | 0.045    | -0.184                                                  | 0.094    | 5.13E-02  | -0.369  | 0.001    | -0.197                                                  | 0.094    | 3.66E-02  | -0.382  | -0.012  |
|                         | <i>apoeb</i>                     | -0.181                                                  | 0.090    | 4.53E-02  | -0.357 | -0.004   | -0.170                                                  | 0.099    | 8.64E-02  | -0.365  | 0.024    | -0.167                                                  | 0.099    | 9.21E-02  | -0.362  | 0.027   |
|                         | <i>apobb.1</i>                   | -0.190                                                  | 0.096    | 4.64E-02  | -0.378 | -0.003   | -0.186                                                  | 0.106    | 7.95E-02  | -0.393  | 0.022    | -0.207                                                  | 0.107    | 5.29E-02  | -0.417  | 0.003   |
|                         | body length (in SD)              | -                                                       | -        | -         | -      | -        | -0.004                                                  | 0.083    | 9.63E-01  | -0.167  | 0.159    | -0.009                                                  | 0.084    | 9.12E-01  | -0.175  | 0.156   |
|                         | dorsal body surface area (in SD) | -                                                       | -        | -         | -      | -        | -0.069                                                  | 0.068    | 3.11E-01  | -0.202  | 0.064    | -0.071                                                  | 0.069    | 3.00E-01  | -0.206  | 0.063   |
|                         | LDL cholesterol levels (in SD)   | -                                                       | -        | -         | -      | -        | -                                                       | -        | -         | -       | -        | 0.086                                                   | 0.061    | 1.57E-01  | -0.033  | 0.204   |
|                         | HDL cholesterol levels (in SD)   | -                                                       | -        | -         | -      | -        | -                                                       | -        | -         | -       | -        | 0.073                                                   | 0.068    | 2.86E-01  | -0.061  | 0.207   |
|                         | triglyceride levels (in SD)      | -                                                       | -        | -         | -      | -        | -                                                       | -        | -         | -       | -        | 0.060                                                   | 0.085    | 4.82E-01  | -0.106  | 0.226   |
|                         | glucose levels (in SD)           | -                                                       | -        | -         | -      | -        | -                                                       | -        | -         | -       | -        | -0.074                                                  | 0.064    | 2.47E-01  | -0.199  | 0.051   |
|                         | time of day (in hours since 9AM) | 0.008                                                   | 0.047    | 8.71E-01  | -0.084 | 0.099    | 0.012                                                   | 0.052    | 8.18E-01  | -0.091  | 0.115    | 0.017                                                   | 0.053    | 7.53E-01  | -0.087  | 0.120   |
|                         | intercept_random                 | 0.946                                                   | 1.148    | 4.10E-01  | -1.304 | 3.196    | 1.163                                                   | 1.212    | 3.37E-01  | -1.212  | 3.538    | 1.342                                                   | 1.209    | 2.67E-01  | -1.027  | 3.711   |
|                         | <i>apoba</i>                     | -0.123                                                  | 0.336    | 7.14E-01  | -0.782 | 0.535    | -0.127                                                  | 0.365    | 7.28E-01  | -0.841  | 0.588    | -0.186                                                  | 0.363    | 6.08E-01  | -0.897  | 0.525   |
|                         | <i>apobb.2</i>                   | -0.173                                                  | 0.218    | 4.27E-01  | -0.601 | 0.254    | -0.228                                                  | 0.238    | 3.38E-01  | -0.695  | 0.239    | -0.278                                                  | 0.239    | 2.45E-01  | -0.747  | 0.191   |
|                         | <i>ldlr</i>                      | -0.088                                                  | 2.256    | 9.69E-01  | -4.511 | 4.334    | -0.312                                                  | 2.335    | 8.94E-01  | -4.889  | 4.266    | -0.245                                                  | 2.333    | 9.16E-01  | -4.817  | 4.327   |
| random factors          | <i>variance by batch</i>         | 0.442                                                   | 0.129    | -         | 0.249  | 0.784    | 0.421                                                   | 0.130    | -         | 0.230   | 0.773    | 0.396                                                   | 0.128    | -         | 0.211   | 0.744   |
|                         | <i>residual</i>                  | 0.878                                                   | 0.037    | -         | 0.808  | 0.954    | 0.903                                                   | 0.040    | -         | 0.828   | 0.986    | 0.896                                                   | 0.040    | -         | 0.821   | 0.979   |

continued Supplementary Table 21

|                         |                                  | Vascular co-localization of lipids with macrophages     |          |           |          |           |                                                         |          |           |          |           |                                                         |          |           |          |          |
|-------------------------|----------------------------------|---------------------------------------------------------|----------|-----------|----------|-----------|---------------------------------------------------------|----------|-----------|----------|-----------|---------------------------------------------------------|----------|-----------|----------|----------|
|                         |                                  | 128 vs. 89 larvae with 2 vs. 0 mutated alleles (n=217)  |          |           |          |           | 115 vs. 79 larvae with 2 vs. 0 mutated alleles (n=194)  |          |           |          |           | 115 vs. 79 larvae with 2 vs. 0 mutated alleles (n=194)  |          |           |          |          |
|                         |                                  | Effect                                                  | SE       | P         | lci      | uci       | Effect                                                  | SE       | P         | lci      | uci       | Effect                                                  | SE       | P         | lci      | uci      |
| negative binomial terms | 2 vs. 0 mutated alleles          | 0.184                                                   | 0.338    | 5.87E-01  | -0.479   | 0.846     | 0.244                                                   | 0.377    | 5.19E-01  | -0.496   | 0.983     | 0.208                                                   | 0.380    | 5.84E-01  | -0.536   | 0.952    |
|                         | <i>apoea</i>                     | -0.008                                                  | 0.252    | 9.76E-01  | -0.502   | 0.487     | -0.147                                                  | 0.270    | 5.87E-01  | -0.676   | 0.382     | -0.168                                                  | 0.269    | 5.31E-01  | -0.696   | 0.359    |
|                         | <i>apoeb</i>                     | 0.023                                                   | 0.231    | 9.22E-01  | -0.431   | 0.476     | 0.141                                                   | 0.254    | 5.80E-01  | -0.358   | 0.639     | 0.136                                                   | 0.260    | 6.01E-01  | -0.373   | 0.645    |
|                         | <i>apobb.1</i>                   | 1.145                                                   | 0.230    | 6.01E-07  | 0.696    | 1.595     | 0.895                                                   | 0.296    | 2.49E-03  | 0.315    | 1.474     | 0.799                                                   | 0.363    | 2.75E-02  | 0.088    | 1.510    |
|                         | body length (in SD)              | -                                                       | -        | -         | -        | -         | -0.164                                                  | 0.238    | 4.90E-01  | -0.631   | 0.302     | -0.215                                                  | 0.281    | 4.45E-01  | -0.766   | 0.336    |
|                         | dorsal body surface area (in SD) | -                                                       | -        | -         | -        | -         | 0.319                                                   | 0.150    | 3.34E-02  | 0.025    | 0.613     | 0.308                                                   | 0.149    | 3.88E-02  | 0.016    | 0.601    |
|                         | LDL cholesterol levels (in SD)   | -                                                       | -        | -         | -        | -         | -                                                       | -        | -         | -        | -         | 0.094                                                   | 0.171    | 5.83E-01  | -0.241   | 0.429    |
|                         | HDL cholesterol levels (in SD)   | -                                                       | -        | -         | -        | -         | -                                                       | -        | -         | -        | -         | 0.118                                                   | 0.224    | 5.98E-01  | -0.321   | 0.558    |
|                         | triglyceride levels (in SD)      | -                                                       | -        | -         | -        | -         | -                                                       | -        | -         | -        | -         | 0.178                                                   | 0.275    | 5.18E-01  | -0.362   | 0.717    |
|                         | glucose levels (in SD)           | -                                                       | -        | -         | -        | -         | -                                                       | -        | -         | -        | -         | -0.088                                                  | 0.162    | 5.86E-01  | -0.406   | 0.229    |
|                         | time of day (in hours since 9AM) | 0.091                                                   | 0.112    | 4.16E-01  | -0.128   | 0.310     | 0.088                                                   | 0.132    | 5.04E-01  | -0.170   | 0.347     | 0.117                                                   | 0.141    | 4.07E-01  | -0.160   | 0.394    |
|                         | batch 2                          | -2.643                                                  | 0.693    | 1.38E-04  | -4.002   | -1.284    | -3.005                                                  | 0.793    | 1.50E-04  | -4.559   | -1.452    | -3.007                                                  | 0.802    | 1.77E-04  | -4.579   | -1.435   |
|                         | batch 3                          | -1.141                                                  | 0.418    | 6.35E-03  | -1.961   | -0.322    | -1.133                                                  | 0.497    | 2.27E-02  | -2.107   | -0.158    | -1.092                                                  | 0.549    | 4.67E-02  | -2.169   | -0.016   |
|                         | batch 4                          | -0.119                                                  | 0.500    | 8.12E-01  | -1.099   | 0.861     | -0.367                                                  | 0.567    | 5.18E-01  | -1.477   | 0.744     | -0.283                                                  | 0.635    | 6.56E-01  | -1.528   | 0.961    |
|                         | batch 5                          | 0.440                                                   | 0.405    | 2.76E-01  | -0.353   | 1.233     | 0.151                                                   | 0.506    | 7.65E-01  | -0.840   | 1.143     | 0.003                                                   | 0.757    | 9.97E-01  | -1.482   | 1.487    |
|                         | batch 6                          | -0.124                                                  | 0.392    | 7.52E-01  | -0.891   | 0.644     | -0.142                                                  | 0.452    | 7.53E-01  | -1.028   | 0.744     | -0.318                                                  | 0.969    | 7.42E-01  | -2.217   | 1.580    |
|                         | batch 7                          | -0.761                                                  | 0.790    | 3.35E-01  | -2.309   | 0.787     | -1.260                                                  | 0.764    | 9.92E-02  | -2.758   | 0.238     | -1.208                                                  | 0.973    | 2.14E-01  | -3.115   | 0.699    |
|                         | intercept                        | 563.870                                                 | 199.665  | 4.74E-03  | 172.534  | 955.207   | 660.449                                                 | 204.076  | 1.21E-03  | 260.468  | 1060.430  | 696.194                                                 | 205.187  | 6.91E-04  | 294.035  | 1098.352 |
| <i>apoba</i>            | -0.860                           | 1.155                                                   | 4.57E-01 | -3.122    | 1.403    | -1.185    | 1.185                                                   | 3.18E-01 | -3.508    | 1.138    | -0.979    | 1.236                                                   | 4.28E-01 | -3.401    | 1.443    |          |
| <i>apobb.2</i>          | -0.139                           | 0.519                                                   | 7.89E-01 | -1.156    | 0.878    | -0.355    | 0.519                                                   | 4.94E-01 | -1.372    | 0.663    | -0.287    | 0.561                                                   | 6.09E-01 | -1.386    | 0.813    |          |
| <i>ldlr</i>             | -1400.000                        | 498.871                                                 | 4.96E-03 | -2400.000 | -423.915 | -1600.000 | 509.990                                                 | 1.30E-03 | -2600.000 | -640.783 | -1700.000 | 512.929                                                 | 7.40E-04 | -2700.000 | -725.512 |          |
|                         |                                  | Vascular infiltration by neutrophils                    |          |           |          |           |                                                         |          |           |          |           |                                                         |          |           |          |          |
|                         |                                  | 175 vs. 118 larvae with 2 vs. 0 mutated alleles (n=293) |          |           |          |           | 159 vs. 103 larvae with 2 vs. 0 mutated alleles (n=262) |          |           |          |           | 159 vs. 103 larvae with 2 vs. 0 mutated alleles (n=262) |          |           |          |          |
|                         |                                  | Effect                                                  | SE       | P         | lci      | uci       | Effect                                                  | SE       | P         | lci      | uci       | Effect                                                  | SE       | P         | lci      | uci      |
| fixed factors           | 2 vs. 0 mutated alleles          | -0.224                                                  | 0.131    | 8.60E-02  | -0.480   | 0.032     | -0.222                                                  | 0.141    | 1.14E-01  | -0.498   | 0.053     | -0.218                                                  | 0.140    | 1.21E-01  | -0.493   | 0.057    |
|                         | <i>apoea</i>                     | -0.033                                                  | 0.083    | 6.88E-01  | -0.197   | 0.130     | -0.071                                                  | 0.087    | 4.18E-01  | -0.242   | 0.100     | -0.067                                                  | 0.087    | 4.42E-01  | -0.238   | 0.104    |
|                         | <i>apoeb</i>                     | -0.053                                                  | 0.087    | 5.38E-01  | -0.223   | 0.116     | -0.014                                                  | 0.092    | 8.81E-01  | -0.194   | 0.166     | -0.030                                                  | 0.092    | 7.45E-01  | -0.210   | 0.150    |
|                         | <i>apobb.1</i>                   | 0.126                                                   | 0.092    | 1.71E-01  | -0.054   | 0.306     | 0.034                                                   | 0.098    | 7.28E-01  | -0.158   | 0.225     | 0.057                                                   | 0.099    | 5.62E-01  | -0.137   | 0.251    |
|                         | body length (in SD)              | -                                                       | -        | -         | -        | -         | -0.161                                                  | 0.076    | 3.44E-02  | -0.310   | -0.012    | -0.138                                                  | 0.078    | 7.50E-02  | -0.290   | 0.014    |
|                         | dorsal body surface area (in SD) | -                                                       | -        | -         | -        | -         | 0.007                                                   | 0.062    | 9.06E-01  | -0.114   | 0.129     | 0.030                                                   | 0.063    | 6.39E-01  | -0.094   | 0.153    |
|                         | LDL cholesterol levels (in SD)   | -                                                       | -        | -         | -        | -         | -                                                       | -        | -         | -        | -         | -0.033                                                  | 0.055    | 5.50E-01  | -0.141   | 0.075    |
|                         | HDL cholesterol levels (in SD)   | -                                                       | -        | -         | -        | -         | -                                                       | -        | -         | -        | -         | 0.053                                                   | 0.063    | 4.00E-01  | -0.070   | 0.177    |
|                         | triglyceride levels (in SD)      | -                                                       | -        | -         | -        | -         | -                                                       | -        | -         | -        | -         | -0.096                                                  | 0.077    | 2.10E-01  | -0.247   | 0.054    |
|                         | glucose levels (in SD)           | -                                                       | -        | -         | -        | -         | -                                                       | -        | -         | -        | -         | 0.065                                                   | 0.059    | 2.67E-01  | -0.050   | 0.181    |
|                         | time of day (in hours since 9AM) | -0.014                                                  | 0.044    | 7.59E-01  | -0.100   | 0.073     | -0.036                                                  | 0.048    | 4.48E-01  | -0.129   | 0.057     | -0.043                                                  | 0.048    | 3.69E-01  | -0.137   | 0.051    |
|                         | intercept_random                 | 0.244                                                   | 1.101    | 8.25E-01  | -1.914   | 2.402     | -0.103                                                  | 1.119    | 9.27E-01  | -2.297   | 2.091     | -0.103                                                  | 1.119    | 9.26E-01  | -2.296   | 2.089    |
|                         | <i>apoba</i>                     | 0.488                                                   | 0.323    | 1.30E-01  | -0.144   | 1.120     | 0.557                                                   | 0.337    | 9.81E-02  | -0.103   | 1.218     | 0.584                                                   | 0.336    | 8.20E-02  | -0.074   | 1.243    |
|                         | <i>apobb.2</i>                   | -0.169                                                  | 0.210    | 4.21E-01  | -0.581   | 0.243     | -0.093                                                  | 0.221    | 6.73E-01  | -0.526   | 0.340     | -0.094                                                  | 0.222    | 6.72E-01  | -0.529   | 0.341    |
|                         | <i>ldlr</i>                      | -1.665                                                  | 2.175    | 4.44E-01  | -5.927   | 2.598     | -1.151                                                  | 2.169    | 5.96E-01  | -5.403   | 3.100     | -1.232                                                  | 2.173    | 5.71E-01  | -5.492   | 3.027    |
| random factors          | <i>variance by batch</i>         | 0.343                                                   | 0.102    | -         | 0.192    | 0.615     | 0.314                                                   | 0.098    | -         | 0.171    | 0.578     | 0.303                                                   | 0.096    | -         | 0.163    | 0.563    |
|                         | <i>residual</i>                  | 0.847                                                   | 0.036    | -         | 0.780    | 0.919     | 0.839                                                   | 0.037    | -         | 0.769    | 0.915     | 0.834                                                   | 0.037    | -         | 0.765    | 0.910    |

continued Supplementary Table 21

|                         | Vascular co-localization of lipids with neutrophils    |         |          |           |          |                                                        |         |          |           |          |                                                        |         |          |           |          |          |
|-------------------------|--------------------------------------------------------|---------|----------|-----------|----------|--------------------------------------------------------|---------|----------|-----------|----------|--------------------------------------------------------|---------|----------|-----------|----------|----------|
|                         | 123 vs. 85 larvae with 2 vs. 0 mutated alleles (n=208) |         |          |           |          | 110 vs. 75 larvae with 2 vs. 0 mutated alleles (n=185) |         |          |           |          | 110 vs. 75 larvae with 2 vs. 0 mutated alleles (n=185) |         |          |           |          |          |
|                         | Effect                                                 | SE      | P        | lci       | uci      | Effect                                                 | SE      | P        | lci       | uci      | Effect                                                 | SE      | P        | lci       | uci      |          |
| negative binomial terms | 2 vs. 0 mutated alleles                                | 0.043   | 0.496    | 9.31E-01  | -0.929   | 1.015                                                  | 0.299   | 0.483    | 5.36E-01  | -0.647   | 1.245                                                  | -0.089  | 0.481    | 8.53E-01  | -1.031   | 0.853    |
|                         | <i>apoea</i>                                           | -0.944  | 0.371    | 1.09E-02  | -1.672   | -0.217                                                 | -1.037  | 0.412    | 1.18E-02  | -1.844   | -0.229                                                 | -1.329  | 0.471    | 4.77E-03  | -2.252   | -0.406   |
|                         | <i>apoeb</i>                                           | -0.379  | 0.342    | 2.69E-01  | -1.050   | 0.292                                                  | -0.270  | 0.324    | 4.05E-01  | -0.905   | 0.365                                                  | -0.234  | 0.315    | 4.58E-01  | -0.851   | 0.384    |
|                         | <i>apobb.1</i>                                         | 2.008   | 0.316    | 2.06E-10  | 1.389    | 2.626                                                  | 1.756   | 0.391    | 6.97E-06  | 0.990    | 2.521                                                  | 2.266   | 0.444    | 3.34E-07  | 1.396    | 3.136    |
|                         | body length (in SD)                                    | -       | -        | -         | -        | -                                                      | -0.593  | 0.294    | 4.38E-02  | -1.169   | -0.016                                                 | -0.817  | 0.276    | 3.06E-03  | -1.358   | -0.276   |
|                         | dorsal body surface area (in SD)                       | -       | -        | -         | -        | -                                                      | -0.419  | 0.210    | 4.56E-02  | -0.830   | -0.008                                                 | -0.645  | 0.235    | 5.97E-03  | -1.105   | -0.185   |
|                         | LDL cholesterol levels (in SD)                         | -       | -        | -         | -        | -                                                      | -       | -        | -         | -        | -                                                      | 0.859   | 0.339    | 1.14E-02  | 0.194    | 1.524    |
|                         | HDL cholesterol levels (in SD)                         | -       | -        | -         | -        | -                                                      | -       | -        | -         | -        | -                                                      | 0.974   | 0.369    | 8.26E-03  | 0.251    | 1.696    |
|                         | triglyceride levels (in SD)                            | -       | -        | -         | -        | -                                                      | -       | -        | -         | -        | -                                                      | 0.482   | 0.387    | 2.12E-01  | -0.276   | 1.240    |
|                         | glucose levels (in SD)                                 | -       | -        | -         | -        | -                                                      | -       | -        | -         | -        | -                                                      | 0.588   | 0.284    | 3.80E-02  | 0.032    | 1.144    |
|                         | time of day (in hours since 9AM)                       | -0.130  | 0.173    | 4.50E-01  | -0.469   | 0.208                                                  | 0.204   | 0.227    | 3.68E-01  | -0.240   | 0.648                                                  | 0.345   | 0.236    | 1.45E-01  | -0.119   | 0.808    |
|                         | batch 2                                                | -3.290  | 0.866    | 1.44E-04  | -4.987   | -1.594                                                 | -3.777  | 0.835    | 6.12E-06  | -5.414   | -2.140                                                 | -3.831  | 0.924    | 3.38E-05  | -5.642   | -2.020   |
|                         | batch 3                                                | 0.046   | 0.833    | 9.56E-01  | -1.587   | 1.680                                                  | -0.065  | 0.817    | 9.36E-01  | -1.667   | 1.536                                                  | -0.456  | 0.766    | 5.51E-01  | -1.958   | 1.045    |
|                         | batch 4                                                | -0.858  | 0.698    | 2.19E-01  | -2.225   | 0.509                                                  | -1.467  | 0.741    | 4.77E-02  | -2.919   | -0.015                                                 | -2.263  | 0.873    | 5.97E-03  | -3.974   | -0.552   |
|                         | batch 5                                                | 0.197   | 0.640    | 7.59E-01  | -1.058   | 1.451                                                  | -0.536  | 0.667    | 4.22E-01  | -1.842   | 0.771                                                  | -1.466  | 0.902    | 1.04E-01  | -3.235   | 0.302    |
|                         | batch 6                                                | -1.714  | 0.692    | 1.32E-02  | -3.070   | -0.358                                                 | -1.552  | 0.687    | 2.39E-02  | -2.899   | -0.205                                                 | -1.854  | 1.026    | 7.07E-02  | -3.865   | 0.156    |
|                         | intercept                                              | 469.980 | 217.000  | 3.03E-02  | 44.667   | 895.292                                                | 696.320 | 210.590  | 9.45E-04  | 283.570  | 1109.069                                               | 820.268 | 241.156  | 6.70E-04  | 347.611  | 1292.926 |
|                         | <i>apoba</i>                                           | 2.535   | 1.153    | 2.79E-02  | 0.275    | 4.795                                                  | 2.308   | 1.180    | 5.05E-02  | -0.005   | 4.620                                                  | 4.189   | 1.468    | 4.33E-03  | 1.311    | 7.067    |
| <i>apobb.2</i>          | 1.439                                                  | 0.734   | 5.01E-02 | 0.000     | 2.878    | 1.334                                                  | 0.721   | 6.42E-02 | -0.078    | 2.747    | 2.106                                                  | 0.792   | 7.84E-03 | 0.554     | 3.658    |          |
| <i>ldlr</i>             | -1200.000                                              | 543.813 | 2.89E-02 | -2300.000 | -122.607 | -1800.000                                              | 528.345 | 8.90E-04 | -2800.000 | -720.288 | -2100.000                                              | 605.508 | 5.99E-04 | -3300.000 | -891.491 |          |

  

|                         | Vascular co-localization of macrophages with neutrophils |        |          |          |        |                                                         |        |          |          |        |                                                         |        |          |          |        |        |
|-------------------------|----------------------------------------------------------|--------|----------|----------|--------|---------------------------------------------------------|--------|----------|----------|--------|---------------------------------------------------------|--------|----------|----------|--------|--------|
|                         | 173 vs. 117 larvae with 2 vs. 0 mutated alleles (n=290)  |        |          |          |        | 157 vs. 102 larvae with 2 vs. 0 mutated alleles (n=259) |        |          |          |        | 157 vs. 102 larvae with 2 vs. 0 mutated alleles (n=259) |        |          |          |        |        |
|                         | Effect                                                   | SE     | P        | lci      | uci    | Effect                                                  | SE     | P        | lci      | uci    | Effect                                                  | SE     | P        | lci      | uci    |        |
| negative binomial terms | 2 vs. 0 mutated alleles                                  | -0.299 | 0.223    | 1.80E-01 | -0.736 | 0.138                                                   | -0.455 | 0.232    | 4.99E-02 | -0.910 | 0.000                                                   | -0.465 | 0.233    | 4.57E-02 | -0.922 | -0.009 |
|                         | <i>apoea</i>                                             | -0.150 | 0.128    | 2.39E-01 | -0.401 | 0.100                                                   | -0.158 | 0.134    | 2.38E-01 | -0.420 | 0.104                                                   | -0.156 | 0.136    | 2.50E-01 | -0.422 | 0.110  |
|                         | <i>apoeb</i>                                             | 0.072  | 0.131    | 5.83E-01 | -0.185 | 0.329                                                   | 0.118  | 0.140    | 4.01E-01 | -0.157 | 0.393                                                   | 0.095  | 0.138    | 4.92E-01 | -0.176 | 0.365  |
|                         | <i>apobb.1</i>                                           | -0.072 | 0.153    | 6.36E-01 | -0.372 | 0.227                                                   | -0.085 | 0.147    | 5.64E-01 | -0.373 | 0.203                                                   | -0.039 | 0.147    | 7.91E-01 | -0.328 | 0.250  |
|                         | body length (in SD)                                      | -      | -        | -        | -      | -                                                       | 0.236  | 0.122    | 5.37E-02 | -0.004 | 0.475                                                   | 0.228  | 0.131    | 8.27E-02 | -0.030 | 0.486  |
|                         | dorsal body surface area (in SD)                         | -      | -        | -        | -      | -                                                       | 0.350  | 0.116    | 2.46E-03 | 0.123  | 0.576                                                   | 0.357  | 0.121    | 3.14E-03 | 0.120  | 0.595  |
|                         | LDL cholesterol levels (in SD)                           | -      | -        | -        | -      | -                                                       | -      | -        | -        | -      | -                                                       | 0.031  | 0.106    | 7.70E-01 | -0.177 | 0.238  |
|                         | HDL cholesterol levels (in SD)                           | -      | -        | -        | -      | -                                                       | -      | -        | -        | -      | -                                                       | 0.024  | 0.112    | 8.31E-01 | -0.196 | 0.244  |
|                         | triglyceride levels (in SD)                              | -      | -        | -        | -      | -                                                       | -      | -        | -        | -      | -                                                       | -0.104 | 0.150    | 4.86E-01 | -0.398 | 0.189  |
|                         | glucose levels (in SD)                                   | -      | -        | -        | -      | -                                                       | -      | -        | -        | -      | -                                                       | 0.125  | 0.095    | 1.88E-01 | -0.061 | 0.310  |
|                         | time of day (in hours since 9AM)                         | 0.025  | 0.080    | 7.50E-01 | -0.131 | 0.181                                                   | 0.011  | 0.083    | 8.94E-01 | -0.151 | 0.173                                                   | -0.006 | 0.086    | 9.45E-01 | -0.174 | 0.162  |
|                         | batch 1                                                  | 0.300  | 0.321    | 3.51E-01 | -0.330 | 0.930                                                   | 0.107  | 0.354    | 7.63E-01 | -0.588 | 0.802                                                   | 0.093  | 0.430    | 8.29E-01 | -0.750 | 0.935  |
|                         | batch 2                                                  | 0.189  | 0.490    | 7.00E-01 | -0.771 | 1.149                                                   | 0.246  | 0.462    | 5.94E-01 | -0.659 | 1.152                                                   | 0.208  | 0.501    | 6.78E-01 | -0.773 | 1.189  |
|                         | batch 3                                                  | -0.660 | 0.441    | 1.34E-01 | -1.525 | 0.204                                                   | -0.643 | 0.433    | 1.38E-01 | -1.492 | 0.206                                                   | -0.589 | 0.479    | 2.19E-01 | -1.528 | 0.349  |
|                         | batch 4                                                  | 0.442  | 0.381    | 2.46E-01 | -0.304 | 1.187                                                   | 0.573  | 0.399    | 1.51E-01 | -0.209 | 1.355                                                   | 0.502  | 0.447    | 2.61E-01 | -0.374 | 1.378  |
|                         | batch 5                                                  | 0.067  | 0.387    | 8.63E-01 | -0.692 | 0.826                                                   | -0.183 | 0.405    | 6.51E-01 | -0.976 | 0.610                                                   | -0.028 | 0.457    | 9.52E-01 | -0.923 | 0.868  |
|                         | batch 6                                                  | -1.557 | 0.403    | 1.11E-04 | -2.346 | -0.768                                                  | -2.058 | 0.465    | 9.81E-06 | -2.970 | -1.145                                                  | -1.927 | 0.489    | 8.25E-05 | -2.886 | -0.968 |
|                         | batch 7                                                  | -0.537 | 0.550    | 3.28E-01 | -1.614 | 0.540                                                   | -1.034 | 0.592    | 8.08E-02 | -2.195 | 0.127                                                   | -1.022 | 0.734    | 1.64E-01 | -2.461 | 0.416  |
| intercept               | 3.443                                                    | 0.942  | 2.58E-04 | 1.596    | 5.291  | 3.341                                                   | 0.936  | 3.57E-04 | 1.507    | 5.176  | 2.978                                                   | 0.976  | 2.29E-03 | 1.064    | 4.892  |        |
| <i>apoba</i>            | 0.309                                                    | 0.508  | 5.43E-01 | -0.686   | 1.304  | 0.480                                                   | 0.492  | 3.30E-01 | -0.485   | 1.444  | 0.565                                                   | 0.483  | 2.42E-01 | -0.382   | 1.513  |        |
| <i>apobb.2</i>          | -0.009                                                   | 0.273  | 9.73E-01 | -0.544   | 0.526  | -0.039                                                  | 0.276  | 8.89E-01 | -0.579   | 0.502  | 0.004                                                   | 0.276  | 9.88E-01 | -0.538   | 0.546  |        |
| <i>ldlr</i>             | 0.307                                                    | 0.742  | 6.79E-01 | -1.146   | 1.760  | 0.522                                                   | 0.879  | 5.52E-01 | -1.200   | 2.244  | 0.893                                                   | 0.997  | 3.71E-01 | -1.062   | 2.848  |        |

Dorsal and lateral body surface area and body volume were normalized for body length using residuals. All outcomes were inverse-normally transformed before the analysis and examined using hierarchical linear models. Effects shown are for larvae with two mutated alleles that are highly likely to affect protein function as predicted by Ensembl's Variant Effect Predictor (VEP) compared with larvae with zero CRISPR-mutated alleles. Associations were adjusted for the number of mutated alleles in the other six orthologues, weighted by their predicted effect on protein function, as well as for time of day and batch. Lci and uci are lower and upper boundaries of the 95% confidence interval.

|                |                                  | Body length (n=339) |       |          |        |        |
|----------------|----------------------------------|---------------------|-------|----------|--------|--------|
|                |                                  | Effect              | SE    | P        | lci    | uci    |
| fixed factors  | <i>apoea</i>                     | 0.008               | 0.063 | 8.96E-01 | -0.115 | 0.131  |
|                | <i>apoeb</i>                     | -0.010              | 0.070 | 8.89E-01 | -0.146 | 0.127  |
|                | <i>apoba</i>                     | -0.039              | 0.233 | 8.67E-01 | -0.495 | 0.417  |
|                | <i>apobb.1</i>                   | -0.336              | 0.065 | 2.57E-07 | -0.464 | -0.208 |
|                | <i>apobb.2</i>                   | 0.393               | 0.162 | 1.52E-02 | 0.076  | 0.711  |
|                | <i>ldlra</i>                     | 0.058               | 0.054 | 2.85E-01 | -0.048 | 0.164  |
|                | time of day (in hours since 9AM) | -0.039              | 0.036 | 2.76E-01 | -0.110 | 0.032  |
|                | intercept                        | -1.203              | 0.891 | 1.77E-01 | -2.950 | 0.544  |
|                | <i>ldlrb</i>                     | 2.088               | 1.789 | 2.43E-01 | -1.418 | 5.595  |
| random factors | <i>variance by batch</i>         | 0.497               | 0.135 | -        | 0.292  | 0.846  |
|                | <i>residual</i>                  | 0.698               | 0.027 | -        | 0.647  | 0.753  |

|                |                                  | Dorsal body surface area (n=339) |       |          |        |        |
|----------------|----------------------------------|----------------------------------|-------|----------|--------|--------|
|                |                                  | Effect                           | SE    | P        | lci    | uci    |
| fixed factors  | <i>apoea</i>                     | -0.120                           | 0.074 | 1.08E-01 | -0.266 | 0.026  |
|                | <i>apoeb</i>                     | 0.122                            | 0.083 | 1.39E-01 | -0.040 | 0.284  |
|                | <i>apoba</i>                     | 0.072                            | 0.276 | 7.94E-01 | -0.469 | 0.613  |
|                | <i>apobb.1</i>                   | 0.114                            | 0.077 | 1.39E-01 | -0.037 | 0.266  |
|                | <i>apobb.2</i>                   | -0.426                           | 0.192 | 2.67E-02 | -0.802 | -0.049 |
|                | <i>ldlra</i>                     | -0.069                           | 0.064 | 2.80E-01 | -0.195 | 0.056  |
|                | time of day (in hours since 9AM) | 0.029                            | 0.043 | 4.99E-01 | -0.055 | 0.112  |
|                | intercept                        | 1.396                            | 1.050 | 1.83E-01 | -0.661 | 3.454  |
|                | <i>ldlrb</i>                     | -2.842                           | 2.122 | 1.80E-01 | -7.001 | 1.316  |
| random factors | <i>variance by batch</i>         | 0.475                            | 0.134 | -        | 0.273  | 0.827  |
|                | <i>residual</i>                  | 0.828                            | 0.032 | -        | 0.768  | 0.894  |

|                |                                  | Lateral body surface area (n=335) |       |          |        |       |
|----------------|----------------------------------|-----------------------------------|-------|----------|--------|-------|
|                |                                  | Effect                            | SE    | P        | lci    | uci   |
| fixed factors  | <i>apoea</i>                     | -0.131                            | 0.076 | 8.49E-02 | -0.281 | 0.018 |
|                | <i>apoeb</i>                     | 0.169                             | 0.086 | 4.83E-02 | 0.001  | 0.337 |
|                | <i>apoba</i>                     | -0.013                            | 0.286 | 9.63E-01 | -0.573 | 0.547 |
|                | <i>apobb.1</i>                   | 0.020                             | 0.079 | 8.04E-01 | -0.136 | 0.175 |
|                | <i>apobb.2</i>                   | -0.207                            | 0.196 | 2.92E-01 | -0.592 | 0.178 |
|                | <i>ldlra</i>                     | -0.026                            | 0.066 | 6.99E-01 | -0.155 | 0.104 |
|                | time of day (in hours since 9AM) | 0.014                             | 0.044 | 7.51E-01 | -0.072 | 0.099 |
|                | intercept                        | 1.049                             | 1.076 | 3.30E-01 | -1.061 | 3.158 |
|                | <i>ldlrb</i>                     | -2.429                            | 2.170 | 2.63E-01 | -6.682 | 1.823 |
| random factors | <i>variance by batch</i>         | 0.469                             | 0.132 | -        | 0.270  | 0.814 |
|                | <i>residual</i>                  | 0.845                             | 0.033 | -        | 0.783  | 0.913 |

|                |                                  | Body volume (n=328) |       |          |        |       |
|----------------|----------------------------------|---------------------|-------|----------|--------|-------|
|                |                                  | Effect              | SE    | P        | lci    | uci   |
| fixed factors  | <i>apoea</i>                     | -0.111              | 0.076 | 1.43E-01 | -0.259 | 0.037 |
|                | <i>apoeb</i>                     | 0.170               | 0.085 | 4.48E-02 | 0.004  | 0.336 |
|                | <i>apoba</i>                     | 0.015               | 0.281 | 9.57E-01 | -0.535 | 0.566 |
|                | <i>apobb.1</i>                   | 0.047               | 0.079 | 5.52E-01 | -0.107 | 0.201 |
|                | <i>apobb.2</i>                   | -0.294              | 0.195 | 1.32E-01 | -0.676 | 0.089 |
|                | <i>ldlra</i>                     | -0.043              | 0.065 | 5.11E-01 | -0.171 | 0.085 |
|                | time of day (in hours since 9AM) | 0.036               | 0.044 | 4.09E-01 | -0.050 | 0.122 |
|                | intercept                        | 1.177               | 1.058 | 2.66E-01 | -0.897 | 3.250 |
|                | <i>ldlrb</i>                     | -2.747              | 2.123 | 1.96E-01 | -6.909 | 1.415 |
| random factors | <i>variance by batch</i>         | 0.478               | 0.134 | -        | 0.276  | 0.827 |
|                | <i>residual</i>                  | 0.826               | 0.033 | -        | 0.765  | 0.893 |

All outcomes were normalized for length using residuals, and inverse-normally transformed before the analysis. Associations were examined using hierarchical linear models. Effects shown are for each additional mutated allele in *apoea*, *apoeb*, *apoba*, *apobb.1*, *apobb.2*, *ldlra* and *ldlrb*, weighted by the allele's predicted effect on protein function (i.e. additive model, mutually adjusted). Associations were adjusted for time of day and batch. Lci and uci are lower and upper boundaries of the 95% confidence interval.

|                |                                  | LDL cholesterol levels (n=381) |       |          |        |       |
|----------------|----------------------------------|--------------------------------|-------|----------|--------|-------|
|                |                                  | Effect                         | SE    | P        | lci    | uci   |
| fixed factors  | <i>apoea</i>                     | 0.183                          | 0.080 | 2.31E-02 | 0.025  | 0.341 |
|                | <i>apoeb</i>                     | 0.068                          | 0.089 | 4.43E-01 | -0.106 | 0.243 |
|                | <i>apoba</i>                     | 0.164                          | 0.300 | 5.86E-01 | -0.425 | 0.753 |
|                | <i>apobb.1</i>                   | 0.043                          | 0.085 | 6.17E-01 | -0.124 | 0.209 |
|                | <i>apobb.2</i>                   | 0.293                          | 0.211 | 1.65E-01 | -0.120 | 0.706 |
|                | <i>ldlra</i>                     | -0.027                         | 0.068 | 6.94E-01 | -0.160 | 0.107 |
|                | body length (in SD)              | -                              | -     | -        | -      | -     |
|                | dorsal body surface area (in SD) | -                              | -     | -        | -      | -     |
|                | time of day (in hours since 9AM) | 0.055                          | 0.043 | 2.00E-01 | -0.029 | 0.138 |
|                | intercept                        | 0.392                          | 1.169 | 7.38E-01 | -1.900 | 2.684 |
|                | <i>ldlrb</i>                     | -3.665                         | 2.418 | 1.30E-01 | -8.405 | 1.074 |
| random factors | <i>variance by batch</i>         | 0.331                          | 0.119 | -        | 0.164  | 0.668 |
|                | <i>residual</i>                  | 0.948                          | 0.035 | -        | 0.882  | 1.018 |

|                |                                  | HDL cholesterol levels (n=381) |       |          |        |       |
|----------------|----------------------------------|--------------------------------|-------|----------|--------|-------|
|                |                                  | Effect                         | SE    | P        | lci    | uci   |
| fixed factors  | <i>apoea</i>                     | 0.031                          | 0.073 | 6.76E-01 | -0.113 | 0.174 |
|                | <i>apoeb</i>                     | 0.092                          | 0.081 | 2.54E-01 | -0.066 | 0.250 |
|                | <i>apoba</i>                     | 0.013                          | 0.273 | 9.63E-01 | -0.522 | 0.547 |
|                | <i>apobb.1</i>                   | 0.079                          | 0.077 | 3.06E-01 | -0.072 | 0.230 |
|                | <i>apobb.2</i>                   | 0.318                          | 0.191 | 9.60E-02 | -0.056 | 0.693 |
|                | <i>ldlra</i>                     | 0.066                          | 0.062 | 2.83E-01 | -0.055 | 0.187 |
|                | body length (in SD)              | -                              | -     | -        | -      | -     |
|                | dorsal body surface area (in SD) | -                              | -     | -        | -      | -     |
|                | time of day (in hours since 9AM) | -0.028                         | 0.040 | 4.83E-01 | -0.107 | 0.050 |
|                | intercept                        | -1.030                         | 1.076 | 3.39E-01 | -3.138 | 1.079 |
|                | <i>ldlrb</i>                     | 0.847                          | 2.194 | 6.99E-01 | -3.453 | 5.147 |
| random factors | <i>variance by batch</i>         | 0.592                          | 0.160 | -        | 0.348  | 1.006 |
|                | <i>residual</i>                  | 0.857                          | 0.031 | -        | 0.797  | 0.921 |

|                |                                  | Triglyceride levels (n=381) |       |          |        |        |
|----------------|----------------------------------|-----------------------------|-------|----------|--------|--------|
|                |                                  | Effect                      | SE    | P        | lci    | uci    |
| fixed factors  | <i>apoea</i>                     | -0.083                      | 0.058 | 1.53E-01 | -0.198 | 0.031  |
|                | <i>apoeb</i>                     | 0.008                       | 0.064 | 9.06E-01 | -0.118 | 0.133  |
|                | <i>apoba</i>                     | -0.178                      | 0.217 | 4.11E-01 | -0.604 | 0.247  |
|                | <i>apobb.1</i>                   | 0.108                       | 0.061 | 7.86E-02 | -0.012 | 0.228  |
|                | <i>apobb.2</i>                   | -0.298                      | 0.152 | 4.99E-02 | -0.596 | 0.000  |
|                | <i>ldlra</i>                     | 0.025                       | 0.049 | 6.05E-01 | -0.071 | 0.122  |
|                | body length (in SD)              | -                           | -     | -        | -      | -      |
|                | dorsal body surface area (in SD) | -                           | -     | -        | -      | -      |
|                | time of day (in hours since 9AM) | -0.143                      | 0.032 | 9.33E-06 | -0.206 | -0.080 |
|                | intercept                        | 1.064                       | 0.883 | 2.28E-01 | -0.667 | 2.795  |
|                | <i>ldlrb</i>                     | -0.236                      | 1.746 | 8.93E-01 | -3.658 | 3.187  |
| random factors | <i>variance by batch</i>         | 0.771                       | 0.198 | -        | 0.467  | 1.275  |
|                | <i>residual</i>                  | 0.681                       | 0.025 | -        | 0.634  | 0.732  |

**continued Supplementary Table 23**

|                       |                                         | <b>Total cholesterol levels (n=381)</b> |           |          |            |            |
|-----------------------|-----------------------------------------|-----------------------------------------|-----------|----------|------------|------------|
|                       |                                         | <b>Effect</b>                           | <b>SE</b> | <b>P</b> | <b>lci</b> | <b>uci</b> |
| <b>fixed factors</b>  | <i>apoea</i>                            | 0.046                                   | 0.070     | 5.08E-01 | -0.090     | 0.182      |
|                       | <i>apoeb</i>                            | 0.049                                   | 0.076     | 5.20E-01 | -0.101     | 0.199      |
|                       | <i>apoba</i>                            | 0.192                                   | 0.259     | 4.57E-01 | -0.315     | 0.700      |
|                       | <i>apobb.1</i>                          | -0.219                                  | 0.073     | 2.69E-03 | -0.363     | -0.076     |
|                       | <i>apobb.2</i>                          | -0.109                                  | 0.181     | 5.47E-01 | -0.465     | 0.246      |
|                       | <i>ldlra</i>                            | -0.027                                  | 0.059     | 6.46E-01 | -0.142     | 0.088      |
|                       | <b>body length (in SD)</b>              | -                                       | -         | -        | -          | -          |
|                       | <b>dorsal body surface area (in SD)</b> | -                                       | -         | -        | -          | -          |
|                       | <b>time of day (in hours since 9AM)</b> | 0.075                                   | 0.038     | 5.04E-02 | 0.000      | 0.150      |
|                       | <b>intercept</b>                        | 0.130                                   | 1.036     | 9.00E-01 | -1.899     | 2.160      |
|                       | <i>ldlrb</i>                            | -1.012                                  | 2.082     | 6.27E-01 | -5.092     | 3.068      |
| <b>random factors</b> | <i>variance by batch</i>                | 0.748                                   | 0.198     | -        | 0.445      | 1.255      |
|                       | <i>residual</i>                         | 0.812                                   | 0.030     | -        | 0.756      | 0.873      |

|                       |                                         | <b>Glucose levels (n=381)</b> |           |          |            |            |
|-----------------------|-----------------------------------------|-------------------------------|-----------|----------|------------|------------|
|                       |                                         | <b>Effect</b>                 | <b>SE</b> | <b>P</b> | <b>lci</b> | <b>uci</b> |
| <b>fixed factors</b>  | <i>apoea</i>                            | -0.062                        | 0.080     | 4.36E-01 | -0.220     | 0.095      |
|                       | <i>apoeb</i>                            | 0.121                         | 0.089     | 1.71E-01 | -0.053     | 0.295      |
|                       | <i>apoba</i>                            | -0.141                        | 0.300     | 6.38E-01 | -0.728     | 0.446      |
|                       | <i>apobb.1</i>                          | -0.172                        | 0.085     | 4.27E-02 | -0.338     | -0.006     |
|                       | <i>apobb.2</i>                          | -0.385                        | 0.210     | 6.69E-02 | -0.797     | 0.027      |
|                       | <i>ldlra</i>                            | -0.076                        | 0.068     | 2.63E-01 | -0.209     | 0.057      |
|                       | <b>body length (in SD)</b>              | -                             | -         | -        | -          | -          |
|                       | <b>dorsal body surface area (in SD)</b> | -                             | -         | -        | -          | -          |
|                       | <b>time of day (in hours since 9AM)</b> | 0.038                         | 0.043     | 3.72E-01 | -0.046     | 0.122      |
|                       | <b>intercept</b>                        | 1.544                         | 1.167     | 1.86E-01 | -0.744     | 3.832      |
|                       | <i>ldlrb</i>                            | -1.971                        | 2.410     | 4.13E-01 | -6.694     | 2.752      |
| <b>random factors</b> | <i>variance by batch</i>                | 0.384                         | 0.121     | -        | 0.207      | 0.710      |
|                       | <i>residual</i>                         | 0.943                         | 0.035     | -        | 0.878      | 1.014      |

All outcomes were normalized for length using residuals, and inverse-normally transformed before the analysis. Associations were examined using hierarchical linear models. Effects shown are for each additional mutated allele in *apoea*, *apoeb*, *apoba*, *apobb.1*, *apobb.2*, *ldlra* and *ldlrb*, weighted by the allele's predicted effect on protein function (i.e. additive model, mutually adjusted). Associations were adjusted for time of day and batch. Lci and uci are lower and upper boundaries of the 95% confidence interval.

Supplementary Table 24 - The additive effect of mutated alleles in *apoea*, *apoeb*, *apobb.1* and *ldlra* on image-based vascular atherogenic traits

|                         |                                  | Vascular lipid deposition            |          |          |        |        |                 |          |          |        |        |                 |          |          |        |        |       |
|-------------------------|----------------------------------|--------------------------------------|----------|----------|--------|--------|-----------------|----------|----------|--------|--------|-----------------|----------|----------|--------|--------|-------|
|                         |                                  | Model 1 (n=306)                      |          |          |        |        | Model 2 (n=272) |          |          |        |        | Model 3 (n=272) |          |          |        |        |       |
|                         |                                  | Effect                               | SE       | P        | lci    | uci    | Effect          | SE       | P        | lci    | uci    | Effect          | SE       | P        | lci    | uci    |       |
| negative binomial terms | <i>apoea</i>                     | -0.120                               | 0.158    | 4.47E-01 | -0.431 | 0.190  | -0.169          | 0.173    | 3.28E-01 | -0.509 | 0.170  | -0.124          | 0.172    | 4.71E-01 | -0.462 | 0.214  |       |
|                         | <i>apoeb</i>                     | 0.189                                | 0.146    | 1.96E-01 | -0.098 | 0.476  | 0.231           | 0.160    | 1.49E-01 | -0.083 | 0.546  | 0.227           | 0.162    | 1.61E-01 | -0.090 | 0.545  |       |
|                         | <i>apoba</i>                     | 0.003                                | 0.508    | 9.95E-01 | -0.993 | 0.999  | -0.093          | 0.521    | 8.58E-01 | -1.114 | 0.928  | 0.113           | 0.515    | 8.26E-01 | -0.896 | 1.122  |       |
|                         | <i>apobb.1</i>                   | 0.972                                | 0.144    | 1.52E-11 | 0.690  | 1.255  | 0.972           | 0.183    | 1.02E-07 | 0.614  | 1.329  | 0.947           | 0.196    | 1.30E-06 | 0.564  | 1.331  |       |
|                         | <i>apobb.2</i>                   | -0.330                               | 0.410    | 4.20E-01 | -1.133 | 0.473  | -0.341          | 0.412    | 4.09E-01 | -1.148 | 0.467  | -0.152          | 0.405    | 7.07E-01 | -0.946 | 0.641  |       |
|                         | <i>ldlra</i>                     | 0.007                                | 0.137    | 9.62E-01 | -0.261 | 0.274  | 0.018           | 0.142    | 8.98E-01 | -0.260 | 0.296  | 0.001           | 0.144    | 9.95E-01 | -0.280 | 0.282  |       |
|                         | body length (in SD)              | -                                    | -        | -        | -      | -      | -0.030          | 0.158    | 8.47E-01 | -0.340 | 0.279  | 0.017           | 0.161    | 9.16E-01 | -0.299 | 0.333  |       |
|                         | dorsal body surface area (in SD) | -                                    | -        | -        | -      | -      | 0.176           | 0.126    | 1.61E-01 | -0.070 | 0.423  | 0.196           | 0.128    | 1.25E-01 | -0.055 | 0.447  |       |
|                         | LDL cholesterol levels (in SD)   | -                                    | -        | -        | -      | -      | -               | -        | -        | -      | -      | -0.060          | 0.092    | 5.18E-01 | -0.241 | 0.121  |       |
|                         | HDL cholesterol levels (in SD)   | -                                    | -        | -        | -      | -      | -               | -        | -        | -      | -      | -0.118          | 0.126    | 3.49E-01 | -0.364 | 0.128  |       |
|                         | triglyceride levels (in SD)      | -                                    | -        | -        | -      | -      | -               | -        | -        | -      | -      | 0.193           | 0.170    | 2.56E-01 | -0.140 | 0.527  |       |
|                         | glucose levels (in SD)           | -                                    | -        | -        | -      | -      | -               | -        | -        | -      | -      | -0.049          | 0.104    | 6.40E-01 | -0.254 | 0.156  |       |
|                         | time of day (in hours since 9AM) | -0.107                               | 0.080    | 1.81E-01 | -0.263 | 0.050  | -0.177          | 0.099    | 7.39E-02 | -0.372 | 0.017  | -0.148          | 0.104    | 1.56E-01 | -0.352 | 0.056  |       |
|                         | batch 1                          | 2.477                                | 0.423    | 4.67E-09 | 1.648  | 3.305  | 2.692           | 0.492    | 4.40E-08 | 1.728  | 3.656  | 2.861           | 0.549    | 1.90E-07 | 1.784  | 3.937  |       |
|                         | batch 2                          | 1.303                                | 0.517    | 1.17E-02 | 0.290  | 2.315  | 1.415           | 0.531    | 7.69E-03 | 0.374  | 2.455  | 1.764           | 0.613    | 3.99E-03 | 0.563  | 2.965  |       |
|                         | batch 3                          | 1.771                                | 0.500    | 3.96E-04 | 0.791  | 2.752  | 1.970           | 0.524    | 1.69E-04 | 0.943  | 2.996  | 1.986           | 0.545    | 2.69E-04 | 0.918  | 3.055  |       |
|                         | batch 4                          | 1.559                                | 0.513    | 2.38E-03 | 0.553  | 2.565  | 1.753           | 0.528    | 8.92E-04 | 0.719  | 2.788  | 1.914           | 0.541    | 4.06E-04 | 0.853  | 2.975  |       |
|                         | batch 5                          | 2.972                                | 0.518    | 9.40E-09 | 1.957  | 3.986  | 3.193           | 0.592    | 6.96E-08 | 2.032  | 4.353  | 2.949           | 0.656    | 6.99E-06 | 1.663  | 4.235  |       |
|                         | batch 6                          | 2.623                                | 0.443    | 3.33E-09 | 1.754  | 3.492  | 2.794           | 0.553    | 4.44E-07 | 1.709  | 3.878  | 2.462           | 0.596    | 3.55E-05 | 1.295  | 3.629  |       |
|                         | batch 7                          | 1.974                                | 0.515    | 1.25E-04 | 0.965  | 2.982  | 2.088           | 0.611    | 6.26E-04 | 0.892  | 3.285  | 1.827           | 0.631    | 3.76E-03 | 0.591  | 3.063  |       |
| intercept               | -4.563                           | 1.643                                | 5.47E-03 | -7.783   | -1.344 | -4.567 | 1.623           | 4.90E-03 | -7.748   | -1.385 | -5.112 | 1.615           | 1.55E-03 | -8.276   | -1.947 |        |       |
| <i>ldlr</i>             | 17.601                           | 3.301                                | 9.70E-08 | 11.131   | 24.070 | 18.155 | 3.236           | 2.01E-08 | 11.813   | 24.496 | 17.829 | 3.207           | 2.72E-08 | 11.543   | 24.115 |        |       |
|                         |                                  | Vascular infiltration by macrophages |          |          |        |        |                 |          |          |        |        |                 |          |          |        |        |       |
|                         |                                  | Model 1 (n=368)                      |          |          |        |        | Model 2 (n=328) |          |          |        |        | Model 3 (n=328) |          |          |        |        |       |
|                         |                                  | Effect                               | SE       | P        | lci    | uci    | Effect          | SE       | P        | lci    | uci    | Effect          | SE       | P        | lci    | uci    |       |
| fixed factors           | <i>apoea</i>                     | -0.067                               | 0.075    | 3.70E-01 | -0.213 | 0.079  | -0.111          | 0.081    | 1.67E-01 | -0.269 | 0.047  | -0.126          | 0.081    | 1.20E-01 | -0.285 | 0.033  |       |
|                         | <i>apoeb</i>                     | -0.145                               | 0.082    | 7.49E-02 | -0.305 | 0.015  | -0.125          | 0.089    | 1.59E-01 | -0.299 | 0.049  | -0.129          | 0.089    | 1.49E-01 | -0.303 | 0.046  |       |
|                         | <i>apoba</i>                     | -0.144                               | 0.275    | 6.02E-01 | -0.683 | 0.396  | -0.165          | 0.295    | 5.76E-01 | -0.743 | 0.413  | -0.178          | 0.294    | 5.44E-01 | -0.754 | 0.398  |       |
|                         | <i>apobb.1</i>                   | -0.222                               | 0.080    | 5.54E-03 | -0.379 | -0.065 | -0.208          | 0.087    | 1.72E-02 | -0.379 | -0.037 | -0.222          | 0.089    | 1.23E-02 | -0.396 | -0.048 |       |
|                         | <i>apobb.2</i>                   | -0.300                               | 0.193    | 1.21E-01 | -0.678 | 0.079  | -0.373          | 0.209    | 7.41E-02 | -0.782 | 0.036  | -0.425          | 0.211    | 4.37E-02 | -0.838 | -0.012 |       |
|                         | <i>ldlra</i>                     | 0.034                                | 0.063    | 5.91E-01 | -0.090 | 0.158  | 0.013           | 0.070    | 8.50E-01 | -0.124 | 0.150  | -0.002          | 0.070    | 9.74E-01 | -0.139 | 0.135  |       |
|                         | body length (in SD)              | -                                    | -        | -        | -      | -      | 0.045           | 0.072    | 5.36E-01 | -0.097 | 0.186  | 0.046           | 0.073    | 5.25E-01 | -0.097 | 0.190  |       |
|                         | dorsal body surface area (in SD) | -                                    | -        | -        | -      | -      | -0.044          | 0.061    | 4.67E-01 | -0.163 | 0.075  | -0.045          | 0.061    | 4.67E-01 | -0.165 | 0.076  |       |
|                         | LDL cholesterol levels (in SD)   | -                                    | -        | -        | -      | -      | -               | -        | -        | -      | -      | 0.058           | 0.055    | 2.87E-01 | -0.049 | 0.165  |       |
|                         | HDL cholesterol levels (in SD)   | -                                    | -        | -        | -      | -      | -               | -        | -        | -      | -      | 0.079           | 0.061    | 1.91E-01 | -0.040 | 0.199  |       |
|                         | triglyceride levels (in SD)      | -                                    | -        | -        | -      | -      | -               | -        | -        | -      | -      | 0.034           | 0.074    | 6.50E-01 | -0.112 | 0.179  |       |
|                         | glucose levels (in SD)           | -                                    | -        | -        | -      | -      | -               | -        | -        | -      | -      | -0.043          | 0.054    | 4.32E-01 | -0.149 | 0.064  |       |
|                         | time of day (in hours since 9AM) | 0.031                                | 0.041    | 4.41E-01 | -0.048 | 0.111  | 0.030           | 0.046    | 5.16E-01 | -0.060 | 0.120  | 0.032           | 0.046    | 4.87E-01 | -0.058 | 0.122  |       |
|                         | intercept                        | 1.063                                | 1.075    | 3.23E-01 | -1.044 | 3.170  | 1.346           | 1.122    | 2.30E-01 | -0.853 | 3.544  | 1.478           | 1.121    | 1.87E-01 | -0.719 | 3.675  |       |
|                         | <i>ldlr</i>                      | -0.104                               | 2.197    | 9.62E-01 | -4.411 | 4.202  | -0.347          | 2.258    | 8.78E-01 | -4.773 | 4.079  | -0.329          | 2.258    | 8.84E-01 | -4.755 | 4.097  |       |
|                         | random factors                   | variation by batch                   | 0.514    | 0.140    | -      | 0.301  | 0.877           | 0.509    | 0.143    | -      | 0.293  | 0.884           | 0.479    | 0.138    | -      | 0.272  | 0.844 |
|                         |                                  | residual                             | 0.858    | 0.032    | -      | 0.798  | 0.923           | 0.878    | 0.035    | -      | 0.812  | 0.949           | 0.874    | 0.035    | -      | 0.809  | 0.944 |



continued Supplementary Table 24

|                         |                                  | Vascular co-localization of lipids with macrophages |          |          |        |        |                 |          |          |        |        |                 |          |          |        |       |
|-------------------------|----------------------------------|-----------------------------------------------------|----------|----------|--------|--------|-----------------|----------|----------|--------|--------|-----------------|----------|----------|--------|-------|
|                         |                                  | Model 1 (n=301)                                     |          |          |        |        | Model 2 (n=269) |          |          |        |        | Model 3 (n=269) |          |          |        |       |
|                         |                                  | Effect                                              | SE       | P        | lci    | uci    | Effect          | SE       | P        | lci    | uci    | Effect          | SE       | P        | lci    | uci   |
| negative binomial terms | <i>apoae</i>                     | -0.299                                              | 0.234    | 2.02E-01 | -0.758 | 0.160  | -0.410          | 0.246    | 9.58E-02 | -0.893 | 0.073  | -0.351          | 0.244    | 1.51E-01 | -0.830 | 0.128 |
|                         | <i>apoeb</i>                     | -0.142                                              | 0.180    | 4.31E-01 | -0.496 | 0.212  | -0.123          | 0.198    | 5.34E-01 | -0.512 | 0.265  | -0.113          | 0.198    | 5.67E-01 | -0.501 | 0.275 |
|                         | <i>apoba</i>                     | 0.123                                               | 0.760    | 8.71E-01 | -1.367 | 1.613  | 0.108           | 0.745    | 8.85E-01 | -1.353 | 1.569  | 0.456           | 0.805    | 5.71E-01 | -1.122 | 2.035 |
|                         | <i>apobb.1</i>                   | 1.049                                               | 0.204    | 2.71E-07 | 0.649  | 1.449  | 0.963           | 0.248    | 1.05E-04 | 0.476  | 1.449  | 0.881           | 0.273    | 1.27E-03 | 0.345  | 1.416 |
|                         | <i>apobb.2</i>                   | -0.154                                              | 0.475    | 7.46E-01 | -1.086 | 0.778  | -0.233          | 0.499    | 6.41E-01 | -1.211 | 0.746  | 0.002           | 0.496    | 9.96E-01 | -0.970 | 0.975 |
|                         | <i>ldlra</i>                     | -0.096                                              | 0.193    | 6.22E-01 | -0.475 | 0.284  | -0.079          | 0.191    | 6.79E-01 | -0.454 | 0.296  | -0.102          | 0.191    | 5.95E-01 | -0.476 | 0.273 |
|                         | body length (in SD)              | -                                                   | -        | -        | -      | -      | -0.093          | 0.245    | 7.05E-01 | -0.574 | 0.388  | -0.060          | 0.256    | 8.14E-01 | -0.563 | 0.442 |
|                         | dorsal body surface area (in SD) | -                                                   | -        | -        | -      | -      | 0.096           | 0.152    | 5.30E-01 | -0.203 | 0.394  | 0.068           | 0.154    | 6.58E-01 | -0.233 | 0.369 |
|                         | LDL cholesterol levels (in SD)   | -                                                   | -        | -        | -      | -      | -               | -        | -        | -      | -      | -0.086          | 0.151    | 5.69E-01 | -0.382 | 0.210 |
|                         | HDL cholesterol levels (in SD)   | -                                                   | -        | -        | -      | -      | -               | -        | -        | -      | -      | 0.009           | 0.170    | 9.58E-01 | -0.325 | 0.343 |
|                         | triglyceride levels (in SD)      | -                                                   | -        | -        | -      | -      | -               | -        | -        | -      | -      | 0.316           | 0.235    | 1.78E-01 | -0.144 | 0.776 |
|                         | glucose levels (in SD)           | -                                                   | -        | -        | -      | -      | -               | -        | -        | -      | -      | -0.116          | 0.137    | 3.95E-01 | -0.384 | 0.151 |
|                         | time of day (in hours since 9AM) | 0.031                                               | 0.090    | 7.32E-01 | -0.146 | 0.208  | 0.026           | 0.115    | 8.23E-01 | -0.199 | 0.250  | 0.092           | 0.122    | 4.48E-01 | -0.146 | 0.331 |
|                         | batch 1                          | 1.673                                               | 0.598    | 5.14E-03 | 0.501  | 2.845  | 1.703           | 0.705    | 1.57E-02 | 0.321  | 3.086  | 1.674           | 0.786    | 3.32E-02 | 0.134  | 3.214 |
|                         | batch 2                          | 1.054                                               | 0.863    | 2.22E-01 | -0.637 | 2.745  | 0.884           | 0.862    | 3.05E-01 | -0.805 | 2.574  | 0.758           | 0.928    | 4.14E-01 | -1.060 | 2.577 |
|                         | batch 3                          | 0.934                                               | 0.618    | 1.30E-01 | -0.277 | 2.145  | 0.910           | 0.646    | 1.59E-01 | -0.356 | 2.176  | 0.785           | 0.664    | 2.37E-01 | -0.517 | 2.086 |
|                         | batch 4                          | 1.449                                               | 0.652    | 2.62E-02 | 0.171  | 2.727  | 1.271           | 0.677    | 6.02E-02 | -0.055 | 2.598  | 1.260           | 0.720    | 7.98E-02 | -0.150 | 2.671 |
|                         | batch 5                          | 2.334                                               | 0.705    | 9.37E-04 | 0.951  | 3.717  | 2.246           | 0.827    | 6.64E-03 | 0.624  | 3.867  | 1.773           | 0.883    | 4.46E-02 | 0.043  | 3.504 |
|                         | batch 6                          | 1.190                                               | 0.648    | 6.62E-02 | -0.080 | 2.460  | 1.252           | 0.865    | 1.48E-01 | -0.443 | 2.947  | 0.663           | 0.932    | 4.77E-01 | -1.164 | 2.489 |
|                         | batch 7                          | 0.737                                               | 0.971    | 4.48E-01 | -1.166 | 2.640  | 0.545           | 1.090    | 6.17E-01 | -1.592 | 2.682  | 0.141           | 1.122    | 9.00E-01 | -2.057 | 2.340 |
| intercept               | -5.120                           | 1.899                                               | 7.02E-03 | -8.842   | -1.398 | -4.899 | 1.863           | 8.54E-03 | -8.550   | -1.248 | -5.421 | 1.971           | 5.95E-03 | -9.284   | -1.558 |       |
| <i>ldlr</i>             | 14.867                           | 3.709                                               | 6.11E-05 | 7.598    | 22.136 | 15.184 | 3.380           | 7.03E-06 | 8.560    | 21.808 | 14.218 | 3.406           | 2.98E-05 | 7.543    | 20.893 |       |

  

|               |                                  | Vascular infiltration by neutrophils |       |          |        |       |                 |       |          |        |       |                 |       |          |        |       |       |
|---------------|----------------------------------|--------------------------------------|-------|----------|--------|-------|-----------------|-------|----------|--------|-------|-----------------|-------|----------|--------|-------|-------|
|               |                                  | Model 1 (n=371)                      |       |          |        |       | Model 2 (n=330) |       |          |        |       | Model 3 (n=330) |       |          |        |       |       |
|               |                                  | Effect                               | SE    | P        | lci    | uci   | Effect          | SE    | P        | lci    | uci   | Effect          | SE    | P        | lci    | uci   |       |
| fixed factors | <i>apoae</i>                     | -0.047                               | 0.076 | 5.36E-01 | -0.196 | 0.102 | -0.076          | 0.081 | 3.52E-01 | -0.234 | 0.083 | -0.083          | 0.082 | 3.11E-01 | -0.244 | 0.078 |       |
|               | <i>apoeb</i>                     | 0.001                                | 0.084 | 9.87E-01 | -0.162 | 0.165 | 0.028           | 0.090 | 7.54E-01 | -0.147 | 0.204 | 0.010           | 0.090 | 9.09E-01 | -0.166 | 0.186 |       |
|               | <i>apoba</i>                     | 0.099                                | 0.281 | 7.25E-01 | -0.452 | 0.650 | 0.111           | 0.296 | 7.07E-01 | -0.469 | 0.692 | 0.110           | 0.295 | 7.10E-01 | -0.469 | 0.689 |       |
|               | <i>apobb.1</i>                   | 0.103                                | 0.082 | 2.07E-01 | -0.057 | 0.264 | 0.042           | 0.088 | 6.32E-01 | -0.130 | 0.214 | 0.061           | 0.089 | 4.96E-01 | -0.114 | 0.235 |       |
|               | <i>apobb.2</i>                   | -0.056                               | 0.198 | 7.79E-01 | -0.443 | 0.332 | 0.021           | 0.210 | 9.19E-01 | -0.391 | 0.434 | 0.006           | 0.212 | 9.76E-01 | -0.410 | 0.423 |       |
|               | <i>ldlra</i>                     | -0.074                               | 0.064 | 2.51E-01 | -0.200 | 0.052 | -0.066          | 0.070 | 3.47E-01 | -0.204 | 0.072 | -0.069          | 0.070 | 3.29E-01 | -0.207 | 0.069 |       |
|               | body length (in SD)              | -                                    | -     | -        | -      | -     | -0.111          | 0.071 | 1.19E-01 | -0.250 | 0.028 | -0.098          | 0.072 | 1.71E-01 | -0.239 | 0.043 |       |
|               | dorsal body surface area (in SD) | -                                    | -     | -        | -      | -     | 0.050           | 0.060 | 4.00E-01 | -0.067 | 0.168 | 0.067           | 0.060 | 2.67E-01 | -0.051 | 0.186 |       |
|               | LDL cholesterol levels (in SD)   | -                                    | -     | -        | -      | -     | -               | -     | -        | -      | -     | 0.006           | 0.054 | 9.15E-01 | -0.099 | 0.111 |       |
|               | HDL cholesterol levels (in SD)   | -                                    | -     | -        | -      | -     | -               | -     | -        | -      | -     | 0.083           | 0.060 | 1.72E-01 | -0.036 | 0.201 |       |
|               | triglyceride levels (in SD)      | -                                    | -     | -        | -      | -     | -               | -     | -        | -      | -     | -0.054          | 0.072 | 4.50E-01 | -0.195 | 0.086 |       |
|               | glucose levels (in SD)           | -                                    | -     | -        | -      | -     | -               | -     | -        | -      | -     | 0.062           | 0.054 | 2.55E-01 | -0.045 | 0.169 |       |
|               | time of day (in hours since 9AM) | 0.016                                | 0.041 | 6.95E-01 | -0.064 | 0.095 | -0.020          | 0.045 | 6.63E-01 | -0.107 | 0.068 | -0.022          | 0.045 | 6.28E-01 | -0.109 | 0.066 |       |
|               | intercept                        | 0.777                                | 1.093 | 4.77E-01 | -1.364 | 2.919 | 0.584           | 1.122 | 6.03E-01 | -1.615 | 2.782 | 0.617           | 1.122 | 5.82E-01 | -1.582 | 2.815 |       |
|               | <i>ldlr</i>                      | -2.049                               | 2.254 | 3.63E-01 | -6.467 | 2.369 | -1.571          | 2.281 | 4.91E-01 | -6.041 | 2.900 | -1.525          | 2.285 | 5.05E-01 | -6.005 | 2.954 |       |
|               | random factors                   | variation by batch                   | 0.352 | 0.100    | -      | 0.201 | 0.615           | 0.323 | 0.097    | -      | 0.179 | 0.583           | 0.296 | 0.092    | -      | 0.161 | 0.543 |
|               |                                  | residual                             | 0.882 | 0.033    | -      | 0.820 | 0.948           | 0.888 | 0.035    | -      | 0.822 | 0.959           | 0.885 | 0.035    | -      | 0.819 | 0.956 |

continued Supplementary Table 24

|                         |                                  | Vascular co-localization of lipids with neutrophils |          |          |          |          |                 |          |           |          |          |                 |          |           |          |         |
|-------------------------|----------------------------------|-----------------------------------------------------|----------|----------|----------|----------|-----------------|----------|-----------|----------|----------|-----------------|----------|-----------|----------|---------|
|                         |                                  | Model 1 (n=282)                                     |          |          |          |          | Model 2 (n=250) |          |           |          |          | Model 3 (n=250) |          |           |          |         |
|                         |                                  | Effect                                              | SE       | P        | lci      | uci      | Effect          | SE       | P         | lci      | uci      | Effect          | SE       | P         | lci      | uci     |
| negative binomial terms | <i>apoae</i>                     | -0.154                                              | 0.268    | 5.65E-01 | -0.679   | 0.371    | -0.015          | 0.284    | 9.58E-01  | -0.572   | 0.542    | -0.361          | 0.318    | 2.57E-01  | -0.985   | 0.263   |
|                         | <i>apoeb</i>                     | 0.079                                               | 0.270    | 7.71E-01 | -0.451   | 0.608    | 0.177           | 0.278    | 5.24E-01  | -0.369   | 0.723    | 0.181           | 0.277    | 5.14E-01  | -0.361   | 0.723   |
|                         | <i>apoba</i>                     | 0.520                                               | 0.995    | 6.01E-01 | -1.431   | 2.471    | 0.985           | 0.931    | 2.90E-01  | -0.840   | 2.811    | 1.882           | 1.019    | 6.48E-02  | -0.116   | 3.880   |
|                         | <i>apobb.1</i>                   | 1.722                                               | 0.263    | 5.80E-11 | 1.206    | 2.237    | 1.619           | 0.309    | 1.54E-07  | 1.015    | 2.224    | 1.547           | 0.357    | 1.43E-05  | 0.848    | 2.246   |
|                         | <i>apobb.2</i>                   | 0.441                                               | 0.640    | 4.91E-01 | -0.814   | 1.696    | 0.187           | 0.654    | 7.75E-01  | -1.095   | 1.468    | 1.103           | 0.719    | 1.25E-01  | -0.308   | 2.513   |
|                         | <i>ldlra</i>                     | 0.033                                               | 0.247    | 8.93E-01 | -0.451   | 0.517    | 0.040           | 0.254    | 8.76E-01  | -0.458   | 0.537    | -0.071          | 0.245    | 7.71E-01  | -0.551   | 0.408   |
|                         | body length (in SD)              | -                                                   | -        | -        | -        | -        | -0.035          | 0.259    | 8.94E-01  | -0.542   | 0.473    | -0.272          | 0.275    | 3.22E-01  | -0.811   | 0.267   |
|                         | dorsal body surface area (in SD) | -                                                   | -        | -        | -        | -        | 0.122           | 0.231    | 5.96E-01  | -0.330   | 0.575    | -0.014          | 0.233    | 9.52E-01  | -0.471   | 0.443   |
|                         | LDL cholesterol levels (in SD)   | -                                                   | -        | -        | -        | -        | -               | -        | -         | -        | -        | 0.620           | 0.267    | 2.04E-02  | 0.096    | 1.143   |
|                         | HDL cholesterol levels (in SD)   | -                                                   | -        | -        | -        | -        | -               | -        | -         | -        | -        | 0.513           | 0.331    | 1.22E-01  | -0.137   | 1.162   |
|                         | triglyceride levels (in SD)      | -                                                   | -        | -        | -        | -        | -               | -        | -         | -        | -        | 1.085           | 0.342    | 1.49E-03  | 0.415    | 1.754   |
|                         | glucose levels (in SD)           | -                                                   | -        | -        | -        | -        | -               | -        | -         | -        | -        | 0.339           | 0.202    | 9.27E-02  | -0.056   | 0.735   |
|                         | time of day (in hours since 9AM) | -0.184                                              | 0.167    | 2.69E-01 | -0.511   | 0.142    | -0.151          | 0.207    | 4.66E-01  | -0.557   | 0.255    | -0.085          | 0.207    | 6.82E-01  | -0.491   | 0.321   |
|                         | batch 2                          | -1.524                                              | 0.842    | 7.03E-02 | -3.174   | 0.126    | -1.617          | 0.913    | 7.67E-02  | -3.407   | 0.173    | -0.683          | 1.032    | 5.08E-01  | -2.706   | 1.340   |
|                         | batch 3                          | -0.627                                              | 0.721    | 3.84E-01 | -2.039   | 0.785    | -0.692          | 0.679    | 3.08E-01  | -2.023   | 0.638    | -1.417          | 0.659    | 3.15E-02  | -2.709   | -0.125  |
|                         | batch 4                          | -0.239                                              | 0.580    | 6.80E-01 | -1.376   | 0.897    | -0.154          | 0.654    | 8.14E-01  | -1.437   | 1.128    | -0.859          | 0.667    | 1.98E-01  | -2.167   | 0.449   |
|                         | batch 5                          | 0.980                                               | 0.549    | 7.45E-02 | -0.097   | 2.056    | 0.862           | 0.629    | 1.71E-01  | -0.371   | 2.094    | -1.191          | 0.923    | 1.97E-01  | -3.001   | 0.619   |
|                         | batch 6                          | -1.064                                              | 0.550    | 5.31E-02 | -2.143   | 0.014    | -0.926          | 0.600    | 1.23E-01  | -2.102   | 0.250    | -2.069          | 0.970    | 3.30E-02  | -3.971   | -0.168  |
|                         | batch 7                          | -1.512                                              | 0.951    | 1.12E-01 | -3.377   | 0.353    | -1.677          | 1.009    | 9.65E-02  | -3.654   | 0.300    | -3.366          | 1.259    | 7.52E-03  | -5.834   | -0.898  |
|                         | intercept                        | -28.073                                             | 216.656  | 8.97E-01 | -452.711 | 396.565  | 61.871          | 235.125  | 7.92E-01  | -398.965 | 522.707  | 201.886         | 254.650  | 4.28E-01  | -297.219 | 700.991 |
| <i>ldlr</i>             | 66.921                           | 543.258                                             | 9.02E-01 | -997.846 | 1131.688 | -160.054 | 589.423         | 7.86E-01 | -1300.000 | 995.195  | -515.165 | 638.098         | 4.19E-01 | -1800.000 | 735.485  |         |

|                         |                                  | Vascular co-localization of macrophages with neutrophils |          |          |        |        |                 |          |          |        |        |                 |          |          |        |        |
|-------------------------|----------------------------------|----------------------------------------------------------|----------|----------|--------|--------|-----------------|----------|----------|--------|--------|-----------------|----------|----------|--------|--------|
|                         |                                  | Model 1 (n=367)                                          |          |          |        |        | Model 2 (n=327) |          |          |        |        | Model 3 (n=327) |          |          |        |        |
|                         |                                  | Effect                                                   | SE       | P        | lci    | uci    | Effect          | SE       | P        | lci    | uci    | Effect          | SE       | P        | lci    | uci    |
| negative binomial terms | <i>apoae</i>                     | -0.102                                                   | 0.116    | 3.77E-01 | -0.329 | 0.125  | -0.094          | 0.123    | 4.45E-01 | -0.334 | 0.147  | -0.092          | 0.124    | 4.58E-01 | -0.335 | 0.151  |
|                         | <i>apoeb</i>                     | 0.133                                                    | 0.118    | 2.60E-01 | -0.099 | 0.366  | 0.136           | 0.126    | 2.81E-01 | -0.111 | 0.383  | 0.121           | 0.124    | 3.30E-01 | -0.122 | 0.363  |
|                         | <i>apoba</i>                     | 0.055                                                    | 0.417    | 8.96E-01 | -0.762 | 0.871  | 0.302           | 0.411    | 4.63E-01 | -0.504 | 1.108  | 0.350           | 0.410    | 3.93E-01 | -0.453 | 1.153  |
|                         | <i>apobb.1</i>                   | 0.036                                                    | 0.140    | 7.96E-01 | -0.237 | 0.310  | 0.079           | 0.141    | 5.77E-01 | -0.198 | 0.356  | 0.109           | 0.143    | 4.45E-01 | -0.172 | 0.391  |
|                         | <i>apobb.2</i>                   | -0.252                                                   | 0.300    | 4.01E-01 | -0.840 | 0.336  | -0.387          | 0.335    | 2.48E-01 | -1.044 | 0.269  | -0.297          | 0.320    | 3.53E-01 | -0.924 | 0.330  |
|                         | <i>ldlra</i>                     | -0.141                                                   | 0.108    | 1.90E-01 | -0.352 | 0.070  | -0.189          | 0.108    | 7.87E-02 | -0.401 | 0.022  | -0.178          | 0.109    | 1.02E-01 | -0.392 | 0.035  |
|                         | body length (in SD)              | -                                                        | -        | -        | -      | -      | 0.308           | 0.112    | 5.73E-03 | 0.090  | 0.527  | 0.269           | 0.120    | 2.51E-02 | 0.034  | 0.505  |
|                         | dorsal body surface area (in SD) | -                                                        | -        | -        | -      | -      | 0.271           | 0.110    | 1.35E-02 | 0.056  | 0.487  | 0.267           | 0.116    | 2.16E-02 | 0.039  | 0.495  |
|                         | LDL cholesterol levels (in SD)   | -                                                        | -        | -        | -      | -      | -               | -        | -        | -      | -      | 0.066           | 0.092    | 4.72E-01 | -0.114 | 0.247  |
|                         | HDL cholesterol levels (in SD)   | -                                                        | -        | -        | -      | -      | -               | -        | -        | -      | -      | -0.016          | 0.100    | 8.73E-01 | -0.213 | 0.181  |
|                         | triglyceride levels (in SD)      | -                                                        | -        | -        | -      | -      | -               | -        | -        | -      | -      | -0.049          | 0.123    | 6.93E-01 | -0.290 | 0.193  |
|                         | glucose levels (in SD)           | -                                                        | -        | -        | -      | -      | -               | -        | -        | -      | -      | 0.119           | 0.081    | 1.44E-01 | -0.041 | 0.278  |
|                         | time of day (in hours since 9AM) | 0.074                                                    | 0.068    | 2.75E-01 | -0.059 | 0.206  | 0.086           | 0.073    | 2.38E-01 | -0.057 | 0.228  | 0.073           | 0.075    | 3.33E-01 | -0.075 | 0.220  |
|                         | batch 1                          | 0.378                                                    | 0.325    | 2.45E-01 | -0.259 | 1.014  | 0.123           | 0.361    | 7.34E-01 | -0.585 | 0.831  | 0.236           | 0.418    | 5.72E-01 | -0.583 | 1.056  |
|                         | batch 2                          | 0.213                                                    | 0.485    | 6.61E-01 | -0.738 | 1.165  | 0.222           | 0.454    | 6.26E-01 | -0.669 | 1.112  | 0.353           | 0.477    | 4.60E-01 | -0.583 | 1.289  |
|                         | batch 3                          | -0.552                                                   | 0.397    | 1.64E-01 | -1.331 | 0.226  | -0.656          | 0.403    | 1.04E-01 | -1.445 | 0.134  | -0.534          | 0.429    | 2.13E-01 | -1.376 | 0.307  |
|                         | batch 4                          | 0.911                                                    | 0.392    | 2.01E-02 | 0.143  | 1.679  | 0.999           | 0.417    | 1.65E-02 | 0.182  | 1.816  | 0.992           | 0.445    | 2.57E-02 | 0.120  | 1.863  |
|                         | batch 5                          | 0.171                                                    | 0.373    | 6.46E-01 | -0.560 | 0.903  | -0.182          | 0.394    | 6.44E-01 | -0.955 | 0.590  | -0.012          | 0.441    | 9.78E-01 | -0.877 | 0.852  |
|                         | batch 6                          | -1.591                                                   | 0.383    | 3.32E-05 | -2.342 | -0.840 | -2.219          | 0.456    | 1.13E-06 | -3.113 | -1.326 | -2.105          | 0.475    | 9.32E-06 | -3.036 | -1.174 |
|                         | batch 7                          | -0.432                                                   | 0.491    | 3.79E-01 | -1.395 | 0.531  | -1.048          | 0.569    | 6.57E-02 | -2.163 | 0.068  | -1.007          | 0.646    | 1.19E-01 | -2.273 | 0.258  |
| intercept               | 3.948                            | 0.846                                                    | 3.06E-06 | 2.290    | 5.605  | 3.908  | 0.912           | 1.82E-05 | 2.121    | 5.695  | 3.376  | 0.937           | 3.16E-04 | 1.539    | 5.213  |        |
| <i>ldlr</i>             | 0.044                            | 0.776                                                    | 9.54E-01 | -1.477   | 1.566  | 0.090  | 0.894           | 9.20E-01 | -1.662   | 1.843  | 0.663  | 1.014           | 5.14E-01 | -1.326   | 2.651  |        |

All outcomes were normalized for length using residuals, and inverse-normally transformed before the analysis. Associations were examined using hierarchical linear models. Effects shown are for each additional mutated allele in *apoae*, *apoeb*, *apoba*, *apobb.1*, *apobb.2*, *ldlra* and *ldlr*, weighted by the allele's predicted effect on protein function (i.e. additive model, mutually adjusted). Associations were adjusted for time of day and batch. Lci and uci are lower and upper boundaries of the 95% confidence interval.

Supplementary Table 25 - The additive effect of mutated alleles in *apoae*, *apoeb*, *apoba*, *apobb.1*, *apobb.2*, *ldlra* and *ldlr*b on image and image quantification quality

|                                  | Debris included in the segmentation for body size (n=374) |       |          |       |        |
|----------------------------------|-----------------------------------------------------------|-------|----------|-------|--------|
|                                  | OR                                                        | SE    | P        | lci   | uci    |
| <i>apoae</i>                     | 0.580                                                     | 0.179 | 7.70E-02 | 0.317 | 1.061  |
| <i>apoeb</i>                     | 1.511                                                     | 0.525 | 2.34E-01 | 0.765 | 2.986  |
| <i>apoba</i>                     | 2.543                                                     | 3.029 | 4.33E-01 | 0.246 | 26.260 |
| <i>apobb.1</i>                   | 0.569                                                     | 0.189 | 8.91E-02 | 0.297 | 1.090  |
| <i>apobb.2</i>                   | 2.123                                                     | 1.781 | 3.69E-01 | 0.410 | 10.993 |
| <i>ldlra</i>                     | 0.791                                                     | 0.187 | 3.22E-01 | 0.497 | 1.258  |
| <i>ldlr</i> b                    | 355                                                       | 13000 | 8.74E-01 | 0.000 | -      |
| time of day (in hours since 9AM) | 1.088                                                     | 0.148 | 5.33E-01 | 0.834 | 1.420  |
| intercept                        | 0.001                                                     | 0.009 | 6.20E-01 | 0.000 | -      |

|                                  | Many false positive lipid deposits |       |          |       |       |                 |         |          |       |       |                 |        |          |       |       |                 |        |          |       |       |
|----------------------------------|------------------------------------|-------|----------|-------|-------|-----------------|---------|----------|-------|-------|-----------------|--------|----------|-------|-------|-----------------|--------|----------|-------|-------|
|                                  | Model 1 (n=373)                    |       |          |       |       | Model 2 (n=245) |         |          |       |       | Model 3 (n=245) |        |          |       |       | Model 4 (n=245) |        |          |       |       |
|                                  | OR                                 | SE    | P        | lci   | uci   | OR              | SE      | P        | lci   | uci   | OR              | SE     | P        | lci   | uci   | OR              | SE     | P        | lci   | uci   |
| <i>apoae</i>                     | 0.837                              | 0.187 | 4.26E-01 | 0.539 | 1.298 | 0.979           | 0.295   | 9.44E-01 | 0.542 | 1.767 | 1.081           | 0.343  | 8.07E-01 | 0.580 | 2.014 | 1.284           | 0.429  | 4.54E-01 | 0.667 | 2.472 |
| <i>apoeb</i>                     | 0.918                              | 0.234 | 7.38E-01 | 0.557 | 1.514 | 0.899           | 0.311   | 7.57E-01 | 0.456 | 1.771 | 0.919           | 0.322  | 8.09E-01 | 0.462 | 1.827 | 0.907           | 0.324  | 7.85E-01 | 0.450 | 1.828 |
| <i>apoba</i>                     | 0.845                              | 0.698 | 8.38E-01 | 0.167 | 4.264 | 0.189           | 0.230   | 1.72E-01 | 0.017 | 2.065 | 0.189           | 0.240  | 1.89E-01 | 0.016 | 2.265 | 0.213           | 0.279  | 2.37E-01 | 0.017 | 2.755 |
| <i>apobb.1</i>                   | 0.842                              | 0.201 | 4.70E-01 | 0.527 | 1.344 | 0.658           | 0.212   | 1.94E-01 | 0.349 | 1.238 | 0.640           | 0.206  | 1.66E-01 | 0.340 | 1.203 | 0.660           | 0.217  | 2.06E-01 | 0.347 | 1.256 |
| <i>apobb.2</i>                   | 0.514                              | 0.300 | 2.54E-01 | 0.164 | 1.611 | 0.202           | 0.244   | 1.85E-01 | 0.019 | 2.145 | 0.296           | 0.371  | 3.31E-01 | 0.025 | 3.455 | 0.343           | 0.453  | 4.18E-01 | 0.026 | 4.571 |
| <i>ldlra</i>                     | 1.175                              | 0.222 | 3.93E-01 | 0.812 | 1.701 | 1.507           | 0.385   | 1.09E-01 | 0.913 | 2.487 | 1.544           | 0.402  | 9.54E-02 | 0.927 | 2.573 | 1.623           | 0.442  | 7.50E-02 | 0.952 | 2.766 |
| <i>ldlr</i> b                    | 1927                               | 58000 | 8.03E-01 | 0.000 | -     | -               | -       | -        | -     | -     | -               | -      | -        | -     | -     | -               | -      | -        | -     | -     |
| time of day (in hours since 9AM) | 1.243                              | 0.129 | 3.62E-02 | 1.014 | 1.524 | 0.998           | 0.143   | 9.90E-01 | 0.754 | 1.321 | 0.989           | 0.142  | 9.37E-01 | 0.747 | 1.309 | 0.977           | 0.143  | 8.77E-01 | 0.733 | 1.303 |
| body length (in SD)              | -                                  | -     | -        | -     | -     | 1.838           | 0.423   | 8.20E-03 | 1.170 | 2.885 | 1.613           | 0.385  | 4.52E-02 | 1.010 | 2.576 | 1.667           | 0.427  | 4.58E-02 | 1.010 | 2.754 |
| dorsal body surface area (in SD) | -                                  | -     | -        | -     | -     | 2.156           | 0.448   | 2.17E-04 | 1.435 | 3.240 | 1.959           | 0.427  | 2.02E-03 | 1.278 | 3.002 | 1.901           | 0.418  | 3.44E-03 | 1.236 | 2.924 |
| LDL cholesterol levels (in SD)   | -                                  | -     | -        | -     | -     | -               | -       | -        | -     | -     | -               | -      | -        | -     | -     | 0.580           | 0.113  | 5.30E-03 | 0.395 | 0.851 |
| HDL cholesterol levels (in SD)   | -                                  | -     | -        | -     | -     | -               | -       | -        | -     | -     | -               | -      | -        | -     | -     | 0.915           | 0.194  | 6.75E-01 | 0.605 | 1.385 |
| triglyceride levels (in SD)      | -                                  | -     | -        | -     | -     | -               | -       | -        | -     | -     | 1.678           | 0.345  | 1.18E-02 | 1.122 | 2.509 | 1.718           | 0.364  | 1.06E-02 | 1.134 | 2.602 |
| glucose levels (in SD)           | -                                  | -     | -        | -     | -     | -               | -       | -        | -     | -     | 1.035           | 0.176  | 8.40E-01 | 0.742 | 1.444 | 1.077           | 0.189  | 6.74E-01 | 0.763 | 1.519 |
| intercept                        | 0.022                              | 0.270 | 7.56E-01 | 0.000 | -     | 38.951          | 132.322 | 2.81E-01 | 0.050 | 30000 | 19.083          | 67.600 | 4.05E-01 | 0.018 | 20000 | 9.277           | 34.040 | 5.44E-01 | 0.007 | 12000 |

Associations are shown for criteria that resulted in the exclusion of at least 10 larvae. Many false positives: >20% of true negative objects were falsely detected by the quantification pipeline. Associations were examined using logistic regression models. Model 1: adjusted for time of day; Model 2: additionally adjusted for body length and dorsal surface area; Model 3: additionally adjusted for whole-body triglyceride and glucose levels; Model 4: additionally adjusted for whole-body LDL and HDL cholesterol levels. Dorsal body surface area was normalized for body length using residuals; whole-body LDL cholesterol, HDL cholesterol, triglyceride and glucose levels were normalized for protein level using residuals. Effects shown for *apoae*, *apoeb*, *apoba*, *apobb.1*, *apobb.2* and *ldlra* are for each additional mutated allele. Adjusting for batch would have resulted in the exclusion of larvae. Lci and uci are lower and upper boundaries of the 95% confidence

Supplementary Table 26 - The effect of gene x gene interactions on body size

|                       |                                         | Body length (n=339) |       |          |        |       | Dorsal body surface area (n=339) |       |          |        |       | Lateral body surface area (n=335) |       |          |        |       | Body volume (n=328) |       |          |        |       |
|-----------------------|-----------------------------------------|---------------------|-------|----------|--------|-------|----------------------------------|-------|----------|--------|-------|-----------------------------------|-------|----------|--------|-------|---------------------|-------|----------|--------|-------|
|                       |                                         | Effect              | SE    | P        | lci    | uci   | Effect                           | SE    | P        | lci    | uci   | Effect                            | SE    | P        | lci    | uci   | Effect              | SE    | P        | lci    | uci   |
| <b>fixed factors</b>  | <i>apoea</i>                            | -0.223              | 0.170 | 1.90E-01 | -0.557 | 0.110 | -0.155                           | 0.204 | 4.49E-01 | -0.555 | 0.246 | -0.078                            | 0.207 | 7.08E-01 | -0.484 | 0.328 | -0.055              | 0.206 | 7.88E-01 | -0.460 | 0.349 |
|                       | <i>apoeb</i>                            | -0.090              | 0.121 | 4.56E-01 | -0.327 | 0.147 | 0.069                            | 0.145 | 6.36E-01 | -0.216 | 0.353 | 0.205                             | 0.148 | 1.66E-01 | -0.085 | 0.495 | 0.167               | 0.149 | 2.61E-01 | -0.124 | 0.458 |
|                       | <i>apobb.1</i>                          | -0.119              | 0.215 | 5.78E-01 | -0.540 | 0.301 | -0.018                           | 0.257 | 9.43E-01 | -0.523 | 0.486 | -0.180                            | 0.266 | 4.99E-01 | -0.702 | 0.342 | -0.118              | 0.262 | 6.52E-01 | -0.633 | 0.396 |
|                       | <i>ldlra</i>                            | 0.179               | 0.208 | 3.89E-01 | -0.228 | 0.586 | -0.165                           | 0.249 | 5.08E-01 | -0.653 | 0.324 | -0.223                            | 0.254 | 3.80E-01 | -0.721 | 0.275 | -0.217              | 0.250 | 3.87E-01 | -0.707 | 0.274 |
|                       | <i>apoea x apoeb</i>                    | 0.087               | 0.107 | 4.19E-01 | -0.124 | 0.297 | 0.040                            | 0.129 | 7.56E-01 | -0.212 | 0.293 | -0.071                            | 0.131 | 5.88E-01 | -0.328 | 0.186 | -0.025              | 0.131 | 8.46E-01 | -0.281 | 0.231 |
|                       | <i>apoea x apobb.1</i>                  | 0.081               | 0.101 | 4.22E-01 | -0.117 | 0.278 | -0.059                           | 0.121 | 6.26E-01 | -0.296 | 0.178 | 0.010                             | 0.124 | 9.33E-01 | -0.232 | 0.253 | -0.024              | 0.124 | 8.46E-01 | -0.267 | 0.219 |
|                       | <i>apoea x ldlra</i>                    | 0.034               | 0.077 | 6.60E-01 | -0.116 | 0.184 | 0.002                            | 0.092 | 9.85E-01 | -0.178 | 0.182 | 0.040                             | 0.094 | 6.73E-01 | -0.144 | 0.223 | -0.007              | 0.093 | 9.36E-01 | -0.190 | 0.175 |
|                       | <i>apoeb x apobb.1</i>                  | -0.075              | 0.122 | 5.39E-01 | -0.315 | 0.165 | 0.083                            | 0.147 | 5.71E-01 | -0.204 | 0.371 | 0.052                             | 0.151 | 7.33E-01 | -0.245 | 0.348 | 0.057               | 0.149 | 7.02E-01 | -0.235 | 0.349 |
|                       | <i>apoeb x ldlra</i>                    | -0.036              | 0.103 | 7.30E-01 | -0.237 | 0.166 | 0.046                            | 0.123 | 7.11E-01 | -0.196 | 0.288 | 0.060                             | 0.126 | 6.34E-01 | -0.187 | 0.308 | 0.074               | 0.124 | 5.50E-01 | -0.170 | 0.318 |
|                       | <i>apobb.1 x ldlra</i>                  | -0.156              | 0.081 | 5.56E-02 | -0.316 | 0.004 | 0.058                            | 0.098 | 5.53E-01 | -0.133 | 0.250 | 0.106                             | 0.099 | 2.88E-01 | -0.089 | 0.301 | 0.098               | 0.099 | 3.23E-01 | -0.096 | 0.291 |
|                       | <b>time of day (in hours since 9AM)</b> | -0.054              | 0.036 | 1.36E-01 | -0.125 | 0.017 | 0.039                            | 0.043 | 3.60E-01 | -0.045 | 0.124 | 0.023                             | 0.044 | 5.99E-01 | -0.063 | 0.109 | 0.047               | 0.044 | 2.82E-01 | -0.039 | 0.133 |
|                       | <b>intercept</b>                        | 0.284               | 0.288 | 3.25E-01 | -0.281 | 0.849 | -0.173                           | 0.316 | 5.84E-01 | -0.793 | 0.447 | -0.231                            | 0.319 | 4.68E-01 | -0.856 | 0.394 | -0.311              | 0.319 | 3.29E-01 | -0.936 | 0.314 |
| <b>random factors</b> | <i>variance by batch</i>                | 0.510               | 0.138 | -        | 0.300  | 0.866 | 0.469                            | 0.133 | -        | 0.269  | 0.818 | 0.467                             | 0.131 | -        | 0.269  | 0.809 | 0.469               | 0.131 | -        | 0.271  | 0.813 |
|                       | <i>residual</i>                         | 0.696               | 0.027 | -        | 0.645  | 0.751 | 0.835                            | 0.033 | -        | 0.774  | 0.902 | 0.845                             | 0.033 | -        | 0.783  | 0.912 | 0.829               | 0.033 | -        | 0.767  | 0.895 |

Dorsal and lateral body surface area and body volume were normalized for body length using residuals. All outcomes were inverse-normally transformed before the analysis. Associations and interactions were examined using hierarchical linear models in larvae carrying two mutated alleles in *apoba*, *apobb.2* and *ldlrb*. Associations and interactions were examined for each additional mutated allele, weighted by its predicted effect on protein function, i.e. using an additive model. Associations were adjusted for time of day and batch. Lci and uci are lower and upper boundaries of the 95% confidence interval.

Supplementary Table 27 - The effect of gene x gene interactions on whole-body lipid and glucose levels

|                 |                                  | LDL cholesterol levels (n=381) |       |          |        |       | HDL cholesterol levels (n=381) |       |          |        |       | Triglyceride levels (n=381) |       |          |        |        | Total cholesterol levels (n=381) |       |          |        |       |
|-----------------|----------------------------------|--------------------------------|-------|----------|--------|-------|--------------------------------|-------|----------|--------|-------|-----------------------------|-------|----------|--------|--------|----------------------------------|-------|----------|--------|-------|
|                 |                                  | Effect                         | SE    | P        | lci    | uci   | Effect                         | SE    | P        | lci    | uci   | Effect                      | SE    | P        | lci    | uci    | Effect                           | SE    | P        | lci    | uci   |
| fixed factors   | <i>apoae</i>                     | -0.183                         | 0.216 | 3.97E-01 | -0.606 | 0.240 | 0.001                          | 0.196 | 9.94E-01 | -0.383 | 0.386 | -0.164                      | 0.156 | 2.93E-01 | -0.469 | 0.141  | -0.041                           | 0.185 | 8.26E-01 | -0.404 | 0.322 |
|                 | <i>apoeb</i>                     | -0.014                         | 0.147 | 9.22E-01 | -0.303 | 0.274 | 0.036                          | 0.134 | 7.89E-01 | -0.226 | 0.298 | -0.123                      | 0.106 | 2.47E-01 | -0.331 | 0.085  | 0.001                            | 0.126 | 9.94E-01 | -0.246 | 0.248 |
|                 | <i>apobb.1</i>                   | 0.103                          | 0.284 | 7.16E-01 | -0.453 | 0.660 | 0.188                          | 0.258 | 4.66E-01 | -0.317 | 0.693 | -0.163                      | 0.205 | 4.26E-01 | -0.563 | 0.238  | -0.127                           | 0.243 | 6.02E-01 | -0.604 | 0.350 |
|                 | <i>ldlra</i>                     | 0.026                          | 0.273 | 9.25E-01 | -0.510 | 0.561 | 0.102                          | 0.249 | 6.83E-01 | -0.386 | 0.589 | -0.102                      | 0.197 | 6.05E-01 | -0.489 | 0.285  | -0.088                           | 0.235 | 7.07E-01 | -0.548 | 0.372 |
|                 | <i>apoae x apoeb</i>             | 0.103                          | 0.136 | 4.48E-01 | -0.163 | 0.369 | 0.113                          | 0.123 | 3.62E-01 | -0.129 | 0.355 | 0.054                       | 0.098 | 5.84E-01 | -0.138 | 0.246  | 0.013                            | 0.116 | 9.08E-01 | -0.215 | 0.242 |
|                 | <i>apoae x apobb.1</i>           | 0.070                          | 0.132 | 5.97E-01 | -0.188 | 0.328 | -0.077                         | 0.120 | 5.21E-01 | -0.312 | 0.158 | 0.063                       | 0.095 | 5.09E-01 | -0.123 | 0.249  | 0.140                            | 0.113 | 2.16E-01 | -0.082 | 0.361 |
|                 | <i>apoae x ldlra</i>             | 0.122                          | 0.098 | 2.12E-01 | -0.070 | 0.314 | -0.082                         | 0.089 | 3.54E-01 | -0.257 | 0.092 | -0.047                      | 0.071 | 5.06E-01 | -0.185 | 0.091  | -0.030                           | 0.084 | 7.16E-01 | -0.195 | 0.134 |
|                 | <i>apoeb x apobb.1</i>           | -0.023                         | 0.161 | 8.86E-01 | -0.339 | 0.293 | -0.074                         | 0.147 | 6.14E-01 | -0.361 | 0.213 | 0.138                       | 0.116 | 2.34E-01 | -0.089 | 0.366  | -0.026                           | 0.138 | 8.49E-01 | -0.297 | 0.245 |
|                 | <i>apoeb x ldlra</i>             | -0.049                         | 0.135 | 7.17E-01 | -0.313 | 0.215 | -0.004                         | 0.123 | 9.72E-01 | -0.244 | 0.236 | 0.088                       | 0.097 | 3.68E-01 | -0.103 | 0.278  | 0.100                            | 0.116 | 3.85E-01 | -0.126 | 0.327 |
|                 | <i>apobb.1 x ldlra</i>           | -0.078                         | 0.105 | 4.57E-01 | -0.285 | 0.128 | 0.033                          | 0.096 | 7.31E-01 | -0.155 | 0.220 | 0.009                       | 0.076 | 9.03E-01 | -0.139 | 0.158  | -0.104                           | 0.090 | 2.50E-01 | -0.281 | 0.073 |
|                 | time of day (in hours since 9AM) | 0.044                          | 0.043 | 3.01E-01 | -0.039 | 0.128 | -0.035                         | 0.040 | 3.82E-01 | -0.114 | 0.044 | -0.131                      | 0.032 | 4.36E-05 | -0.194 | -0.068 | 0.079                            | 0.038 | 3.92E-02 | 0.004  | 0.153 |
|                 | intercept                        | -0.091                         | 0.299 | 7.60E-01 | -0.678 | 0.495 | -0.158                         | 0.325 | 6.28E-01 | -0.795 | 0.480 | 0.379                       | 0.335 | 2.58E-01 | -0.277 | 1.035  | -0.074                           | 0.353 | 8.35E-01 | -0.766 | 0.619 |
|                 | random factors                   | <i>variance by batch</i>       | 0.350 | 0.120    | -      | 0.179 | 0.685                          | 0.592 | 0.160    | -      | 0.348 | 1.006                       | 0.763 | 0.196    | -      | 0.462  | 1.261                            | 0.746 | 0.197    | -      | 0.445 |
| <i>residual</i> |                                  | 0.945                          | 0.035 | -        | 0.880  | 1.016 | 0.858                          | 0.031 | -        | 0.799  | 0.922 | 0.680                       | 0.025 | -        | 0.633  | 0.731  | 0.810                            | 0.030 | -        | 0.753  | 0.870 |

|                |                                  | Glucose levels (n=381) |          |          |        |       |
|----------------|----------------------------------|------------------------|----------|----------|--------|-------|
|                |                                  | Effect                 | SE       | P        | lci    | uci   |
| fixed factors  | <i>apoae</i>                     | -0.068                 | 0.216    | 7.51E-01 | -0.491 | 0.354 |
|                | <i>apoeb</i>                     | -0.004                 | 0.147    | 9.77E-01 | -0.292 | 0.284 |
|                | <i>apobb.1</i>                   | -0.477                 | 0.283    | 9.22E-02 | -1.032 | 0.078 |
|                | <i>ldlra</i>                     | -0.101                 | 0.273    | 7.12E-01 | -0.635 | 0.434 |
|                | <i>apoae x apoeb</i>             | 0.101                  | 0.136    | 4.55E-01 | -0.165 | 0.367 |
|                | <i>apoae x apobb.1</i>           | -0.090                 | 0.131    | 4.95E-01 | -0.347 | 0.168 |
|                | <i>apoae x ldlra</i>             | -0.087                 | 0.098    | 3.75E-01 | -0.278 | 0.105 |
|                | <i>apoeb x apobb.1</i>           | 0.171                  | 0.161    | 2.89E-01 | -0.145 | 0.486 |
|                | <i>apoeb x ldlra</i>             | 0.021                  | 0.134    | 8.74E-01 | -0.242 | 0.285 |
|                | <i>apobb.1 x ldlra</i>           | 0.087                  | 0.105    | 4.08E-01 | -0.119 | 0.293 |
|                | time of day (in hours since 9AM) | 0.052                  | 0.043    | 2.20E-01 | -0.031 | 0.136 |
| intercept      | 0.046                            | 0.303                  | 8.78E-01 | -0.547   | 0.640  |       |
| random factors | <i>variance by batch</i>         | 0.375                  | 0.119    | -        | 0.201  | 0.699 |
|                | <i>residual</i>                  | 0.943                  | 0.035    | -        | 0.878  | 1.013 |

Dorsal and lateral body surface area and body volume were normalized for body length using residuals. All outcomes were inverse-normally transformed before the analysis. Associations and interactions were examined using hierarchical linear models in larvae carrying two mutated alleles in *apoba*, *apobb.2* and *ldlrb*. Associations and interactions were examined for each additional mutated allele, weighted by its predicted effect on protein function, i.e. using an additive model. Associations were adjusted for time of day and batch. Lci and uci are lower and upper boundaries of the 95% confidence interval.

|                         |                                  | 2 vs. 0 mutated alleles (n=62) |          |          |        |        | Additive model (n=272) |          |          |        |       |
|-------------------------|----------------------------------|--------------------------------|----------|----------|--------|--------|------------------------|----------|----------|--------|-------|
|                         |                                  | Effect                         | SE       | P        | lci    | uci    | Effect                 | SE       | P        | lci    | uci   |
| negative binomial terms | <i>apoae</i>                     | -3.380                         | 0.895    | 1.59E-04 | -5.134 | -1.626 | -1.173                 | 0.618    | 5.77E-02 | -2.385 | 0.038 |
|                         | <i>apoeb</i>                     | 0.078                          | 0.312    | 8.01E-01 | -0.533 | 0.690  | 0.148                  | 0.374    | 6.92E-01 | -0.586 | 0.882 |
|                         | <i>apobb.1</i>                   | 1.104                          | 0.294    | 1.75E-04 | 0.527  | 1.680  | 0.675                  | 0.563    | 2.30E-01 | -0.428 | 1.778 |
|                         | <i>ldlra</i>                     | -0.726                         | 0.367    | 4.75E-02 | -1.445 | -0.008 | -0.481                 | 0.520    | 3.55E-01 | -1.500 | 0.538 |
|                         | <i>apoae x apoeb</i>             | -                              | -        | -        | -      | -      | 0.129                  | 0.354    | 7.16E-01 | -0.564 | 0.821 |
|                         | <i>apoae x apobb.1</i>           | -                              | -        | -        | -      | -      | 0.134                  | 0.278    | 6.30E-01 | -0.411 | 0.678 |
|                         | <i>apoae x ldlra</i>             | 4.368                          | 1.256    | 5.07E-04 | 1.906  | 6.830  | 0.518                  | 0.200    | 9.51E-03 | 0.127  | 0.910 |
|                         | <i>apoeb x apobb.1</i>           | -                              | -        | -        | -      | -      | 0.008                  | 0.328    | 9.80E-01 | -0.634 | 0.650 |
|                         | <i>apoeb x ldlra</i>             | -                              | -        | -        | -      | -      | -0.024                 | 0.260    | 9.28E-01 | -0.533 | 0.486 |
|                         | <i>apobb.1 x ldlra</i>           | -                              | -        | -        | -      | -      | 0.188                  | 0.192    | 3.28E-01 | -0.189 | 0.565 |
|                         | time of day (in hours since 9AM) | 0.144                          | 0.177    | 4.16E-01 | -0.204 | 0.492  | -0.168                 | 0.108    | 1.19E-01 | -0.379 | 0.043 |
|                         | body length (in SD)              | -0.129                         | 0.270    | 6.32E-01 | -0.659 | 0.401  | -0.044                 | 0.170    | 7.97E-01 | -0.377 | 0.289 |
|                         | dorsal body surface area (in SD) | -0.190                         | 0.319    | 5.50E-01 | -0.815 | 0.434  | 0.156                  | 0.125    | 2.13E-01 | -0.090 | 0.401 |
|                         | batch 1                          | -                              | -        | -        | -      | -      | 3.176                  | 0.477    | 2.89E-11 | 2.241  | 4.112 |
|                         | batch 2                          | -0.500                         | 1.066    | 6.39E-01 | -2.589 | 1.589  | 1.667                  | 0.523    | 1.42E-03 | 0.643  | 2.691 |
|                         | batch 3                          | -0.479                         | 0.871    | 5.82E-01 | -2.186 | 1.228  | 2.417                  | 0.505    | 1.73E-06 | 1.426  | 3.407 |
|                         | batch 4                          | -1.364                         | 0.832    | 1.01E-01 | -2.996 | 0.267  | 2.344                  | 0.516    | 5.59E-06 | 1.333  | 3.356 |
|                         | batch 5                          | -0.177                         | 0.716    | 8.05E-01 | -1.580 | 1.226  | 3.737                  | 0.618    | 1.49E-09 | 2.526  | 4.949 |
| batch 6                 | 1.265                            | 0.763                          | 9.76E-02 | -0.231   | 2.761  | 3.373  | 0.582                  | 6.84E-09 | 2.232    | 4.514  |       |
| batch 7                 | 0.398                            | 0.843                          | 6.37E-01 | -1.255   | 2.051  | 2.776  | 0.669                  | 3.32E-05 | 1.465    | 4.088  |       |
| intercept               | 3.518                            | 0.862                          | 4.53E-05 | 1.827    | 5.208  | 2.330  | 0.646                  | 3.09E-04 | 1.064    | 3.596  |       |

|                         |                                  | Vascular co-localization of lipids with macrophages |          |          |         |         |                        |          |          |        |       |
|-------------------------|----------------------------------|-----------------------------------------------------|----------|----------|---------|---------|------------------------|----------|----------|--------|-------|
|                         |                                  | 2 vs. 0 mutated alleles (n=63)                      |          |          |         |         | Additive model (n=269) |          |          |        |       |
|                         |                                  | Effect                                              | SE       | P        | lci     | uci     | Effect                 | SE       | P        | lci    | uci   |
| negative binomial terms | <i>apoae</i>                     | -17.245                                             | 1.068    | 1.15E-58 | -19.338 | -15.152 | -0.324                 | 0.757    | 6.68E-01 | -1.808 | 1.159 |
|                         | <i>apoeb</i>                     | -0.189                                              | 0.297    | 5.25E-01 | -0.771  | 0.393   | 0.264                  | 0.477    | 5.80E-01 | -0.670 | 1.199 |
|                         | <i>apobb.1</i>                   | 1.360                                               | 0.463    | 3.32E-03 | 0.452   | 2.268   | 1.309                  | 0.889    | 1.41E-01 | -0.433 | 3.050 |
|                         | <i>ldlra</i>                     | -1.833                                              | 0.671    | 6.34E-03 | -3.149  | -0.517  | -0.974                 | 0.628    | 1.21E-01 | -2.205 | 0.257 |
|                         | <i>apoae x apoeb</i>             | -                                                   | -        | -        | -       | -       | -0.419                 | 0.419    | 3.18E-01 | -1.241 | 0.404 |
|                         | <i>apoae x apobb.1</i>           | -                                                   | -        | -        | -       | -       | -0.491                 | 0.463    | 2.89E-01 | -1.398 | 0.417 |
|                         | <i>apoae x ldlra</i>             | 19.351                                              | 1.238    | 4.67E-55 | 16.924  | 21.778  | 0.843                  | 0.327    | 1.00E-02 | 0.202  | 1.485 |
|                         | <i>apoeb x apobb.1</i>           | -                                                   | -        | -        | -       | -       | 0.067                  | 0.437    | 8.78E-01 | -0.789 | 0.923 |
|                         | <i>apoeb x ldlra</i>             | -                                                   | -        | -        | -       | -       | 0.040                  | 0.272    | 8.84E-01 | -0.493 | 0.572 |
|                         | <i>apobb.1 x ldlra</i>           | -                                                   | -        | -        | -       | -       | 0.066                  | 0.283    | 8.16E-01 | -0.490 | 0.621 |
|                         | time of day (in hours since 9AM) | 0.429                                               | 0.204    | 3.55E-02 | 0.029   | 0.829   | -0.022                 | 0.128    | 8.62E-01 | -0.272 | 0.228 |
|                         | body length (in SD)              | -1.065                                              | 0.446    | 1.71E-02 | -1.940  | -0.190  | -0.123                 | 0.255    | 6.29E-01 | -0.622 | 0.376 |
|                         | dorsal body surface area (in SD) | -0.253                                              | 0.382    | 5.08E-01 | -1.003  | 0.496   | 0.077                  | 0.159    | 6.28E-01 | -0.234 | 0.388 |
|                         | batch 1                          | 3.022                                               | 1.075    | 4.93E-03 | 0.915   | 5.129   | 2.389                  | 0.665    | 3.24E-04 | 1.087  | 3.692 |
|                         | batch 2                          | 0.013                                               | 1.734    | 9.94E-01 | -3.385  | 3.411   | 1.704                  | 0.900    | 5.84E-02 | -0.061 | 3.468 |
|                         | batch 3                          | 0.181                                               | 1.070    | 8.66E-01 | -1.916  | 2.278   | 1.347                  | 0.621    | 3.02E-02 | 0.129  | 2.564 |
|                         | batch 4                          | 0.071                                               | 1.197    | 9.53E-01 | -2.276  | 2.417   | 2.070                  | 0.688    | 2.61E-03 | 0.723  | 3.418 |
|                         | batch 5                          | 1.672                                               | 1.212    | 1.68E-01 | -0.704  | 4.047   | 3.066                  | 0.810    | 1.54E-04 | 1.478  | 4.654 |
| batch 6                 | 2.193                            | 1.367                                               | 1.09E-01 | -0.486   | 4.872   | 2.085   | 0.839                  | 1.30E-02 | 0.440    | 3.729  |       |
| batch 7                 | 0.385                            | 1.696                                               | 8.20E-01 | -2.939   | 3.709   | 1.495   | 1.121                  | 1.82E-01 | -0.702   | 3.692  |       |
| intercept               | -1.275                           | 1.320                                               | 3.34E-01 | -3.862   | 1.312   | 0.298   | 0.848                  | 7.25E-01 | -1.364   | 1.960  |       |

Dorsal and lateral body surface area and body volume were normalized for body length using residuals. All outcomes were inverse-normally transformed before the analysis. Associations and interactions were examined using hierarchical linear models in larvae carrying two mutated alleles in *apoae*, *apobb.2* and *ldlra*. Associations and interactions were examined for each additional mutated allele, weighted by its predicted effect on protein function, i.e. using an additive model. Associations were adjusted for time of day and batch. Lci and uci are lower and upper boundaries of the 95% confidence interval.

Supplementary Table 29 - The association of image-based vascular atherogenic traits with whole-body lipid and glucose levels

|                         |                                                                                           | Vascular lipid deposition (n=1,118) |          |           |         |         |
|-------------------------|-------------------------------------------------------------------------------------------|-------------------------------------|----------|-----------|---------|---------|
|                         |                                                                                           | Effect                              | SE       | P         | lci     | uci     |
| negative binomial terms | LDL cholesterol levels (in SD)                                                            | -0.010                              | 0.080    | 8.92E-01  | -0.160  | 0.140   |
|                         | HDL cholesterol levels (in SD)                                                            | -0.060                              | 0.080    | 4.65E-01  | -0.220  | 0.100   |
|                         | triglyceride levels (in SD)                                                               | 0.600                               | 0.110    | 2.00E-07  | 0.370   | 0.820   |
|                         | glucose levels (in SD)                                                                    | -0.370                              | 0.100    | 3.57E-04  | -0.570  | -0.170  |
|                         | body length (in SD)                                                                       | 0.110                               | 0.110    | 3.07E-01  | -0.100  | 0.310   |
|                         | dorsal body surface area (in SD)                                                          | 0.070                               | 0.100    | 4.95E-01  | -0.130  | 0.260   |
|                         | Tg(hsp70:IK17:EGFP; mpeg1:mCherry) carriers vs. Tg(mpo:EGFP) & Tg(mpeg1:mCherry) carriers | -3.040                              | 0.640    | 2.18E-06  | -4.290  | -1.780  |
|                         | Tg(flk:EGFP) carriers vs. Tg(mpo:EGFP; mpeg1:mCherry) carriers                            | -1.710                              | 0.410    | 3.72E-05  | -2.520  | -0.900  |
|                         | batch 15                                                                                  | 0.790                               | 0.580    | 1.71E-01  | -0.340  | 1.920   |
|                         | batch 16                                                                                  | 0.360                               | 0.590    | 5.42E-01  | -0.790  | 1.510   |
|                         | batch 17                                                                                  | 0.980                               | 0.600    | 1.03E-01  | -0.200  | 2.160   |
|                         | batch 18                                                                                  | 0.290                               | 0.590    | 6.26E-01  | -0.870  | 1.450   |
|                         | batch 19                                                                                  | 0.000                               | 0.650    | 1.00E+00  | -1.270  | 1.270   |
|                         | batch 33                                                                                  | -0.620                              | 0.410    | 1.31E-01  | -1.430  | 0.190   |
|                         | batch 34                                                                                  | -0.280                              | 0.460    | 5.42E-01  | -1.190  | 0.630   |
|                         | batch 36                                                                                  | 0.380                               | 0.660    | 5.61E-01  | -0.910  | 1.680   |
|                         | batch 37                                                                                  | -19.770                             | 0.560    | 1.35E-269 | -20.870 | -18.660 |
|                         | batch 38                                                                                  | 1.660                               | 0.550    | 2.63E-03  | 0.580   | 2.740   |
|                         | batch 39                                                                                  | -1.180                              | 0.570    | 3.73E-02  | -2.300  | -0.070  |
|                         | batch 40                                                                                  | 1.320                               | 0.420    | 1.61E-03  | 0.500   | 2.140   |
|                         | batch 41                                                                                  | 0.260                               | 0.620    | 6.77E-01  | -0.960  | 1.470   |
|                         | batch 42                                                                                  | 0.060                               | 0.410    | 8.82E-01  | -0.750  | 0.870   |
|                         | batch 43                                                                                  | 0.620                               | 0.500    | 2.19E-01  | -0.370  | 1.600   |
|                         | batch 44                                                                                  | 0.840                               | 0.500    | 8.90E-02  | -0.130  | 1.820   |
|                         | batch 45                                                                                  | 0.510                               | 0.340    | 1.35E-01  | -0.160  | 1.180   |
| intercept               | 4.450                                                                                     | 0.300                               | 5.28E-51 | 3.870     | 5.030   |         |

  

|                         |                                  | Vascular infiltration by oxidized LDL (n=677) |       |          |        |       |
|-------------------------|----------------------------------|-----------------------------------------------|-------|----------|--------|-------|
|                         |                                  | Effect                                        | SE    | P        | lci    | uci   |
| negative binomial terms | LDL cholesterol levels (in SD)   | -0.040                                        | 0.040 | 2.26E-01 | -0.110 | 0.030 |
|                         | HDL cholesterol levels (in SD)   | 0.080                                         | 0.040 | 1.85E-02 | 0.010  | 0.160 |
|                         | triglyceride levels (in SD)      | 0.090                                         | 0.060 | 1.31E-01 | -0.030 | 0.210 |
|                         | glucose levels (in SD)           | 0.080                                         | 0.060 | 2.43E-01 | -0.050 | 0.200 |
|                         | body length (in SD)              | 0.130                                         | 0.050 | 1.08E-02 | 0.030  | 0.240 |
|                         | dorsal body surface area (in SD) | 0.100                                         | 0.050 | 4.49E-02 | 0.000  | 0.190 |
|                         | batch 15                         | 1.280                                         | 0.170 | 1.21E-14 | 0.960  | 1.610 |
|                         | batch 16                         | 0.530                                         | 0.180 | 2.62E-03 | 0.190  | 0.880 |
|                         | batch 17                         | 0.520                                         | 0.160 | 9.04E-04 | 0.210  | 0.830 |
|                         | batch 18                         | 1.190                                         | 0.170 | 1.86E-12 | 0.860  | 1.520 |
|                         | batch 19                         | 1.240                                         | 0.170 | 1.80E-13 | 0.910  | 1.570 |
|                         | batch 36                         | 1.590                                         | 0.160 | 1.73E-22 | 1.270  | 1.910 |
|                         | batch 37                         | 0.870                                         | 0.170 | 3.02E-07 | 0.540  | 1.210 |
|                         | batch 38                         | 1.420                                         | 0.150 | 4.02E-21 | 1.130  | 1.720 |
|                         | intercept                        | 5.410                                         | 0.140 | 0.00E+00 | 5.140  | 5.680 |

  

|                         |                                  | Vascular co-localization of lipids and macrophages (n=908) |       |          |        |        |
|-------------------------|----------------------------------|------------------------------------------------------------|-------|----------|--------|--------|
|                         |                                  | Effect                                                     | SE    | P        | lci    | uci    |
| negative binomial terms | LDL cholesterol levels (in SD)   | 0.140                                                      | 0.130 | 2.89E-01 | -0.120 | 0.400  |
|                         | HDL cholesterol levels (in SD)   | 0.030                                                      | 0.130 | 8.38E-01 | -0.240 | 0.290  |
|                         | triglyceride levels (in SD)      | 0.820                                                      | 0.180 | 7.91E-06 | 0.460  | 1.190  |
|                         | glucose levels (in SD)           | -0.340                                                     | 0.160 | 3.14E-02 | -0.650 | -0.030 |
|                         | body length (in SD)              | -0.280                                                     | 0.190 | 1.33E-01 | -0.650 | 0.090  |
|                         | dorsal body surface area (in SD) | 0.200                                                      | 0.170 | 2.32E-01 | -0.130 | 0.520  |
|                         | batch 39                         | 0.380                                                      | 0.920 | 6.82E-01 | -1.430 | 2.180  |
|                         | batch 40                         | 2.480                                                      | 0.680 | 2.75E-04 | 1.150  | 3.820  |
|                         | batch 41                         | 1.380                                                      | 0.900 | 1.23E-01 | -0.370 | 3.140  |
|                         | batch 42                         | 0.910                                                      | 0.620 | 1.44E-01 | -0.310 | 2.130  |
|                         | batch 43                         | 2.030                                                      | 0.710 | 4.22E-03 | 0.640  | 3.420  |
|                         | batch 44                         | 1.970                                                      | 0.700 | 5.04E-03 | 0.590  | 3.350  |
|                         | batch 45                         | 0.780                                                      | 0.590 | 1.83E-01 | -0.370 | 1.930  |
|                         | intercept                        | 1.180                                                      | 0.530 | 2.46E-02 | 0.150  | 2.220  |

continued Supplementary Table 29

|                         |                                  | Vascular co-localization of macrophages and oxidized LDL (n=619) |       |          |        |        |
|-------------------------|----------------------------------|------------------------------------------------------------------|-------|----------|--------|--------|
|                         |                                  | Effect                                                           | SE    | P        | lci    | uci    |
| negative binomial terms | LDL cholesterol levels (in SD)   | -0.080                                                           | 0.050 | 1.43E-01 | -0.190 | 0.030  |
|                         | HDL cholesterol levels (in SD)   | 0.020                                                            | 0.050 | 7.23E-01 | -0.070 | 0.100  |
|                         | triglyceride levels (in SD)      | 0.320                                                            | 0.100 | 1.67E-03 | 0.120  | 0.530  |
|                         | glucose levels (in SD)           | -0.190                                                           | 0.090 | 2.77E-02 | -0.360 | -0.020 |
|                         | body length (in SD)              | -0.050                                                           | 0.080 | 5.52E-01 | -0.200 | 0.110  |
|                         | dorsal body surface area (in SD) | 0.010                                                            | 0.070 | 9.07E-01 | -0.130 | 0.150  |
|                         | batch 15                         | 0.560                                                            | 0.270 | 3.84E-02 | 0.030  | 1.080  |
|                         | batch 16                         | 0.230                                                            | 0.290 | 4.35E-01 | -0.340 | 0.800  |
|                         | batch 17                         | -0.650                                                           | 0.300 | 2.77E-02 | -1.240 | -0.070 |
|                         | batch 18                         | 0.430                                                            | 0.270 | 1.18E-01 | -0.110 | 0.960  |
|                         | batch 19                         | 0.730                                                            | 0.250 | 3.48E-03 | 0.240  | 1.210  |
|                         | batch 36                         | 0.320                                                            | 0.250 | 2.11E-01 | -0.180 | 0.810  |
|                         | batch 37                         | 0.320                                                            | 0.290 | 2.58E-01 | -0.240 | 0.880  |
|                         | batch 38                         | 1.250                                                            | 0.240 | 1.80E-07 | 0.780  | 1.710  |
|                         | intercept                        | 2.540                                                            | 0.230 | 3.49E-29 | 2.090  | 2.980  |

|                         |                                  | Vascular co-localization of lipids and neutrophils (n=271) |       |          |        |        |
|-------------------------|----------------------------------|------------------------------------------------------------|-------|----------|--------|--------|
|                         |                                  | Effect                                                     | SE    | P        | lci    | uci    |
| negative binomial terms | LDL cholesterol levels (in SD)   | 0.540                                                      | 0.230 | 1.83E-02 | 0.090  | 1.000  |
|                         | HDL cholesterol levels (in SD)   | 0.730                                                      | 0.310 | 1.81E-02 | 0.120  | 1.330  |
|                         | triglyceride levels (in SD)      | 1.100                                                      | 0.260 | 3.53E-05 | 0.580  | 1.610  |
|                         | glucose levels (in SD)           | 0.060                                                      | 0.190 | 7.65E-01 | -0.320 | 0.440  |
|                         | body length (in SD)              | -0.830                                                     | 0.220 | 2.05E-04 | -1.270 | -0.390 |
|                         | dorsal body surface area (in SD) | -0.200                                                     | 0.200 | 3.13E-01 | -0.600 | 0.190  |
|                         | batch 40                         | 4.600                                                      | 1.190 | 1.03E-04 | 2.280  | 6.930  |
|                         | batch 41                         | 3.710                                                      | 1.520 | 1.44E-02 | 0.740  | 6.680  |
|                         | batch 42                         | 2.740                                                      | 1.130 | 1.50E-02 | 0.530  | 4.950  |
|                         | batch 43                         | 3.020                                                      | 1.030 | 3.24E-03 | 1.010  | 5.030  |
|                         | batch 44                         | 3.770                                                      | 1.010 | 1.97E-04 | 1.790  | 5.760  |
|                         | batch 45                         | 3.770                                                      | 1.110 | 6.87E-04 | 1.590  | 5.940  |
|                         | batch 46                         | 3.040                                                      | 1.410 | 3.14E-02 | 0.270  | 5.800  |
|                         | intercept                        | -2.790                                                     | 0.980 | 4.32E-03 | -4.710 | -0.870 |

|                         |                                  | Vascular co-localization of macrophages and neutrophils (n=327) |       |          |        |        |
|-------------------------|----------------------------------|-----------------------------------------------------------------|-------|----------|--------|--------|
|                         |                                  | Effect                                                          | SE    | P        | lci    | uci    |
| negative binomial terms | LDL cholesterol levels (in SD)   | 0.110                                                           | 0.090 | 2.36E-01 | -0.070 | 0.280  |
|                         | HDL cholesterol levels (in SD)   | -0.060                                                          | 0.100 | 5.65E-01 | -0.260 | 0.140  |
|                         | triglyceride levels (in SD)      | -0.040                                                          | 0.130 | 7.29E-01 | -0.290 | 0.210  |
|                         | glucose levels (in SD)           | 0.110                                                           | 0.080 | 1.69E-01 | -0.050 | 0.270  |
|                         | body length (in SD)              | 0.200                                                           | 0.130 | 1.21E-01 | -0.050 | 0.450  |
|                         | dorsal body surface area (in SD) | 0.230                                                           | 0.120 | 4.87E-02 | 0.000  | 0.450  |
|                         | batch 40                         | 0.550                                                           | 0.380 | 1.51E-01 | -0.200 | 1.300  |
|                         | batch 41                         | 0.660                                                           | 0.500 | 1.89E-01 | -0.330 | 1.650  |
|                         | batch 42                         | -0.330                                                          | 0.360 | 3.48E-01 | -1.030 | 0.360  |
|                         | batch 43                         | 1.400                                                           | 0.500 | 4.56E-03 | 0.430  | 2.370  |
|                         | batch 44                         | 0.480                                                           | 0.350 | 1.63E-01 | -0.200 | 1.160  |
|                         | batch 45                         | -1.630                                                          | 0.390 | 2.39E-05 | -2.390 | -0.870 |
|                         | batch 46                         | -0.620                                                          | 0.510 | 2.23E-01 | -1.620 | 0.380  |
|                         | intercept                        | 3.740                                                           | 0.290 | 6.31E-38 | 3.170  | 4.310  |

Associations were examined using negative binomial regression using data from the dietary, drug treatment and genetic proof-of-concept interventions combined. Dorsal body surface area was normalized for body length using residuals; whole-body LDL cholesterol, HDL cholesterol, triglyceride and glucose levels were normalized for protein level using residuals. Lci and uci are lower and upper boundaries of the 95% confidence interval and have been calculated using robust standard errors.



**Supplementary Table 30 - Orthologues of candidate genes in the triglyceride, LDLc and total cholesterol-associated locus on chr 19p13.11**

| Human gene | ENSG            | Zebrafish orthologue | ENSDARG            | Chr | Target %identity | Query %identity | Main human protein | Top hit BLAST      | %identity (protein) | Conserved genes in locus                                                                                                   |
|------------|-----------------|----------------------|--------------------|-----|------------------|-----------------|--------------------|--------------------|---------------------|----------------------------------------------------------------------------------------------------------------------------|
| LPAR2      | ENSG00000064547 | <i>lpar2a</i>        | ENSDARG00000042338 | 3   | 49.16            | 49.86           | ENSP0000384665     | ENSDARP00000154087 | 54.95               | <i>PBX4, ATP13A1, GMIP</i>                                                                                                 |
|            |                 | <i>lpar2b</i>        | ENSDARG00000042561 | 1   | 51.76            | 54.42           |                    | ENSDARP00000062425 | 60.00               | none                                                                                                                       |
| GMIP       | ENSG00000089639 | <i>gmip</i>          | ENSDARG00000077249 | 3   | 36.91            | 34.02           | ENSP00000203556    | ENSDARP00000131373 | 43.92               | <i>ATP13A1, PBX4, LPAR2</i>                                                                                                |
| GATAD2A    | ENSG00000167491 | <i>gata2ab</i>       | ENSDARG00000006192 | 22  | 53.16            | 53.00           | ENSP00000351552    | ENSDARP00000115930 | 53.8                | <i>GMIP, CILP2, YJEFN3, TSSK6, TM6SF2, HAPLN4, NCAN, NR2C2AP, RFXANK, BORCS8, MEF2B, TMEM161A, SLC25A42, ARMC6, HOMER3</i> |
| TM6SF2     | ENSG00000213996 | <i>tm6sf2</i>        | ENSDARG00000029057 | 22  | 43.32            | 42.97           | ENSP00000374014    | ENSDARP00000118571 | 45.86               | <i>GMIP, HAPLN4, NCAN, NR2C2AP, RFXANK, BORCS8, MEF2B, TMEM161A, GATAD2A, TSSK6, YJEFN3,</i>                               |
|            |                 | <i>zgc:85843</i>     | ENSDARG00000105208 | 2   | 43.86            | 39.79           |                    | ENSDARP00000130339 | 45.67               | <i>HOMER3, GMIP, SCL25A42, ARMC6</i>                                                                                       |

Target %identity: percentage of the orthologous sequence matching the human sequence; Query %identity: percentage of the human sequence matching the sequence of the orthologue; Main human protein: Ensembl protein ID for the main transcript; %identity protein: percentage of the aligned query (input sequence, i.e. main human protein) which is identical to the subject (hit) sequence; conserved genes in locus: neighbouring genes conserved across danio rerio and homo sapiens locus according to Genomicus.

Supplementary Table 31 - Identification of moderate-to-highly active CRISPR-Cas9 guide RNAs for 19p13.11 candidate genes

| Human gene       | Zebrafish orthologue      | CRISPR gRNA target sequenc | Genomic location (dabRer11/GRCz11) |                   | Exon           | Strand    | GC (%)    | Self-complementarity | Off-targets |          |          | Predicted efficiency | CRISPRscan score | Target activity (NA <sup>a</sup> , no <sup>b</sup> , low, moderate, high or very high <sup>c</sup> ) | Forward primer                  | Reverse primer                 | product size                   |            |
|------------------|---------------------------|----------------------------|------------------------------------|-------------------|----------------|-----------|-----------|----------------------|-------------|----------|----------|----------------------|------------------|------------------------------------------------------------------------------------------------------|---------------------------------|--------------------------------|--------------------------------|------------|
|                  |                           |                            | Chr                                | Pos               |                |           |           |                      | 0           | 1        | 2        |                      |                  |                                                                                                      |                                 |                                |                                | 3          |
|                  |                           |                            |                                    |                   |                |           |           |                      |             |          |          |                      |                  |                                                                                                      |                                 |                                |                                |            |
| LPAR2            | <i>lpar2a</i>             | GATGCCAGCGAAGAGGTC         | 3                                  | 53,091,511        | 2 of 3         | +         | 60        | 0                    | 0           | 0        | 6        | 0.65                 | -                | NA                                                                                                   | ATTGTCAACCGAAAGTTCCACT          | TGAGGCTCATGTTAATCAATGC         | 175                            |            |
|                  |                           | <b>GGCACTCATGACTTTGT</b>   | <b>3</b>                           | <b>53,091,654</b> | <b>2 of 3</b>  | <b>-</b>  | <b>55</b> | <b>1</b>             | <b>0</b>    | <b>0</b> | <b>0</b> | <b>1</b>             | <b>0.63</b>      | <b>53</b>                                                                                            | <b>high</b>                     | <b>TTAACAGCTGTGAGGCTTTTGA</b>  | <b>AGTGGAACTTTCGGTTGACAAAT</b> | <b>186</b> |
|                  | <i>lpar2b</i>             | <b>GGGACTAAAGCGAAGG</b>    | <b>1</b>                           | <b>59,206,929</b> | <b>2 of 7</b>  | <b>-</b>  | <b>65</b> | <b>1</b>             | <b>0</b>    | <b>0</b> | <b>0</b> | <b>0</b>             | <b>0.76</b>      | <b>76</b>                                                                                            | <b>very high</b>                | <b>TTTTCTTCTACAGCATCAGCCA</b>  | <b>CCAGCAGGTAATAAATGGGGTA</b>  | <b>174</b> |
|                  |                           | GGTCAAACACAAGGAGACC        | 1                                  | 59,204,504        | 3 of 7         | -         | 55        | 0                    | 0           | 0        | 1        | 1                    | 0.70             | 49                                                                                                   | high, but only inframe variants | CTACACGGCATCTTCATTTC           | CGCTAAATGGAAGCTGAATCT          | 187        |
| GMIP             | <i>gmip</i>               | <b>GgPCCACGCCATCCTCGC</b>  | <b>3</b>                           | <b>52,763,869</b> | <b>5 of 20</b> | <b>-</b>  | <b>70</b> | <b>1</b>             | <b>0</b>    | <b>0</b> | <b>0</b> | <b>0.68</b>          | <b>-</b>         | <b>moderate</b>                                                                                      | <b>GTTGATGTGATGTGTTGTTTT</b>    | <b>TCCAGCCTAATACAATGTGTCG</b>  | <b>243</b>                     |            |
|                  |                           | gGTGAAGATCTGCCGTGAA        | 3                                  | 52,753,647        | 4 of 20        | +         | 50        | 0                    | 0           | 0        | 1        | 0.62                 | -                | moderate                                                                                             | TGCCACTGGAAATATTAAGC            | ACGAGTTCTCATCCAAATCTC          | 205                            |            |
| GATAD2A          | <i>gatad2ab</i>           | GAGAAGATGTCAGAAGACC        | 22                                 | 18,353,216        | 2 of 11        | +         | 50        | 0                    | 0           | 0        | 3        | 0.70                 | 51               | NA                                                                                                   | GGTCAGACCCTTGTATGTCCA           | TCTACAGTCCAGTTCTCCTC           | 207                            |            |
|                  |                           | <b>GGTGAAGGCCACCATCAA</b>  | <b>22</b>                          | <b>18,353,404</b> | <b>2 of 11</b> | <b>+</b>  | <b>60</b> | <b>1</b>             | <b>0</b>    | <b>0</b> | <b>1</b> | <b>0.63</b>          | <b>51</b>        | <b>moderate/high</b>                                                                                 | <b>GAGGAGAACCCTGGAGCTGTAGA</b>  | <b>ATGATCGACCCCTAGTTAGCAGC</b> | <b>194</b>                     |            |
| TM6SF2           | <i>tm6sf2</i>             | GGTTATTCTGAAATTGGC         | 22                                 | 17,790,559        | 3 of 11        | +         | 40        | 0                    | 0           | 0        | 7        | 0.60                 | 10               | no                                                                                                   | ACAACCTCAGCATCCTATTTCC          | GGATCCTTAGGAGGATTGAAGC         | 239                            |            |
|                  |                           | GAGGTCAATGACACACGTG        | 22                                 | 17,792,919        | 4 of 11        | -         | 50        | 1                    | 0           | 0        | 0        | 0                    | 0.63             | 62                                                                                                   | NA                              | ACACCACAACACTGAAAGCAAT         | ACGCTAACCGTTTTCTGGTAGA         | 186        |
|                  | <b>GgGTAGCGAGGTAGACCA</b> | <b>22</b>                  | <b>17,790,601</b>                  | <b>3 of 11</b>    | <b>-</b>       | <b>65</b> | <b>1</b>  | <b>0</b>             | <b>0</b>    | <b>0</b> | <b>0</b> | <b>0.67</b>          | <b>69</b>        | <b>very high</b>                                                                                     | <b>ttctatccccacagcaagctaaa</b>  | <b>aggatgaaatgcagaatgtgg</b>   | <b>229</b>                     |            |
|                  | GAGGATTGAAGCGCGTAGC       | 22                         | 17,790,613                         | 3 of 11           | -              | 60        | 1         | 0                    | 0           | 0        | 0        | 0.63                 | 58               | very high                                                                                            | ttctatccccacagcaagctaaa         | aggatgaaatgcagaatgtgg          | 229                            |            |
| <i>zgc:85843</i> |                           | GATGCTGACAAACAGACGTG       | 2                                  | 56,897,287        | 3 of 10        | -         | 50        | 0                    | 0           | 4        | 2        | 0.63                 | 54               | moderate                                                                                             | GATGGGAGGAGAGGGGAG*             | AAATCCATGAAGCCTTTGATG*         | 231                            |            |
|                  |                           | gGTCTTACCGTAGAACAG         | 2                                  | 56,896,546        | 2 of 10        | -         | 45        | 1                    | 0           | 0        | 0        | 1                    | 0.57             | 46                                                                                                   | NA                              | TGGATGTGTTGTGAAATGAT           | GCCTAATATCCTAACCTGCCCA         | 241        |
|                  |                           | gGATGATGAGCTACTGGG         | 2                                  | 56,904,057        | 4 of 10        | +         | 50        | 0                    | 0           | 0        | 6        | 0.68                 | 70               | very high                                                                                            | CTTGTGCTGTTGTTGTAGCAG           | cacaggagggcgaatagtttag         | 244                            |            |
|                  |                           | <b>gGACTGAGGTTTGCCA</b>    | <b>2</b>                           | <b>56,896,504</b> | <b>2 of 10</b> | <b>-</b>  | <b>55</b> | <b>0</b>             | <b>0</b>    | <b>0</b> | <b>4</b> | <b>0.66</b>          | <b>40</b>        | <b>very high</b>                                                                                     | <b>TGAATGGATGTGTTGTGAAA</b>     | <b>ttgtctccagaacaaacacctg</b>  | <b>280</b>                     |            |

CRISPR gRNA target sequences were preferably selected based on location (i.e. in an early exon that affects all transcripts), complementarity (i.e. no complementarity), and free from predicted off targets. Target activity was examined by micro-injections in eight fertilized eggs in multiplex, followed by fragment length PCR analysis at 3 days post-fertilization. Results from target efficiency testing are shown, where NA: Not available due to failed capillary electrophoresis while estimating the length of the targeted region of an exon; No: 8 of 8 larvae test-injected with the gRNA only showed wildtype sequences; Low: 8 of 8 larvae showed wildtype sequence and fewer than 4 of 8 also contained indel sequence; Moderate: 8 of 8 larvae showed wildtype sequence and >4 of 8 also contained indel sequence; High: 8 of 8 larvae showed wildtype as well as indel sequence; Very high: Fewer than 4 of 8 larvae showed wildtype sequence and all larvae showed indel sequence. Target sequences highlighted in bold were selected and used to generate multiplexed mutant zebrafish.

Supplementary Table 32 - Unique CRISPR-Cas9-induced mutations for 19p13.11 candidate genes

| Zebrafish orthologue                                                                                                                    | Sequence                                                                                                                                             | Annotation                | Number of alleles | mean ± SD number of reads |
|-----------------------------------------------------------------------------------------------------------------------------------------|------------------------------------------------------------------------------------------------------------------------------------------------------|---------------------------|-------------------|---------------------------|
| <i>lpar2a</i>                                                                                                                           | <b>TATAGCCGCTATGACCAACATATTGGCCAGGATGATGAAAACACAAATGGGGAGCCCCAGACCAGCCACCACAAAGTCATGAGTGCGCCAGTTTGGACTAATAGGCTTGCCAGTCTGTGTAGAAAGTAAGACACTGGATTG</b> | 142M (wildtype reference) | 1083              | 742 ± 537                 |
|                                                                                                                                         | TATAGCCGCTATGACCAACATATTGGCCAGGATGATGAAAACACAAATGGGGAGCCCCAGACCAGCCACCACAAAGTCATGAGTGCGCCAGTTTGGACTAATAGGCTTGCCAGTCTGTGTAGAAAGTAAGACACTGGATTG        | 69M2D71M                  | 8                 | 512 ± 569                 |
|                                                                                                                                         | TATAGCCGCTATGACCAACATATTGGCCAGGATGATGAAAACACAAATGGGGAGCCCCAGACCAGCCACCACAAAGTCATGAGTGCGCCAGTTTGGACTAATAGGCTTGCCAGTCTGTGTAGAAAGTAAGACACTGGATTG        | 69M8D65M                  | 2                 | 327 ± 65                  |
| <i>lpar2b</i>                                                                                                                           | <b>GTGAAAGCGGGTTCATGAAGATGGCCGCATCACCAGGATGTTGGTGAAGATGACAAAAACACTGACCAGCAGCCCATACCCACCACCGCCTTCGGCTTTAGTCCCCACGATCGCTGATGTTCTTA</b>                 | 130M (wildtype reference) | 1086              | 310 ± 174                 |
|                                                                                                                                         | GTGAAAGCGGGTTCATGAAGATGGCCGCATCACCAGGATGTTGGTGAAGATGACAAAAACACTGACCAGCAGCCCATACCCACCACCGCCTTCGGCTTTAGTCCCCACGATCGCTGATGTTCTTA                        | 89M3D38M                  | 6                 | 278 ± 91                  |
|                                                                                                                                         | <b>TGGACTCAAGACAAAAGCGAACAGGCCAACAGGTGGCGAACATCCTGCGGGCCGGAGAGGTGAAGGTGGAGGTGCAGACCAGCAGCAGCCCGTGGACATGAGCACATCCAAGAGGTTGGTCATGAAATAAGTCCA</b>       | 150M (wildtype reference) | 1062              | 1091 ± 567                |
| <i>gatad2ab</i>                                                                                                                         | TGGACTCAAGACAAAAGCGAACAGGCCAACAGGTGGCGAACATCCTGCGGGCCGGAGAGGTGAAGGTGGAGGTGCAGACCAGCAGCAGCCCGTGGACATGAGCACATCCAAGAGGTTGGTCATGAAATAAGTCCA              | 64M12D74M                 | 27                | 584 ± 349                 |
|                                                                                                                                         | TGGACTCAAGACAAAAGCGAACAGGCCAACAGGTGGCGAACATCCTGCGGGCCGGAGAGGTGAAGGTGGAGGTGCAGACCAGCAGCAGCCCGTGGACATGAGCACATCCAAGAGGTTGGTCATGAAATAAGTCCA              | 77M1S1M12I1M1S2M1S6M      | 2                 | 424 ± 98                  |
|                                                                                                                                         | TGAACTCAAGACAAAAGCGAACAGGCCAACAGGTGGCGAACATCCTGCGGGCCGGAGAGGTGAAGGTGGAGGTGCAGACCAGCAGCAGCCCGTGGACATGAGCACATCCAAGAGGTTGGTCATGAAATAAGTCCA              | 2M1S66M6D75M              | 2                 | 323 ± 48                  |
| TGGACTCAAGACAAAAGCGAACAGGCCAACAGGTGGCGAACATCCTGCGGGCCGGAGAGGTGAAGGTGGAGGTGCAGACCAGCAGCAGCCCGTGGACATGAGCACATCCAAGAGGTTGGTCATGAAATAAGTCCA | 70M8D72M                                                                                                                                             | 1                         | 436               |                           |

Annotation shows the sequential number of base pairs that - when compared with the reference genome from Ensembl - represent a match (M), deletion (D), insertion (I), or substitution (S). For each unique sequence, the number of alleles in which it was observed is shown, as well as the mean and standard deviation for the number of reads that were observed for the sequence.

**Supplementary Table 33 - Unique CRISPR-Cas9-induced mutations in 19p13.11 candidate genes and their predicted functional consequences**

| Zebrafish orthologue | Chr | Start      | End        | Mutation       | Nett base pair change | Annotation VEP     | VEP impact | n <sub>affected alleles</sub> |
|----------------------|-----|------------|------------|----------------|-----------------------|--------------------|------------|-------------------------------|
| <i>lpar2a</i>        | 3   | 53,091,655 | 53,091,659 | CACCA/-        | -5                    | frameshift variant | high       | 1                             |
|                      |     | 53,091,658 | 53,091,659 | CA/-           | -2                    | frameshift variant | high       | 8                             |
|                      |     | 53,091,658 | 53,091,665 | CACAAAGT/-     | -8                    | frameshift variant | high       | 2                             |
| <i>lpar2b</i>        | 1   | 59,206,932 | 59,206,934 | CCG/-          | -3                    | inframe deletion   | moderate   | 6                             |
| <i>gatad2ab</i>      | 22  | 18,353,408 | 18,353,419 | AAGGCCACCATC/- | -12                   | inframe deletion   | moderate   | 27                            |
|                      |     | 18,353,413 | 18,353,418 | CACCAT/-       | -6                    | inframe deletion   | moderate   | 2                             |
|                      |     | 18,353,414 | 18,353,421 | ACCATCAA/-     | -8                    | frameshift variant | high       | 1                             |
|                      |     | 18,353,421 | 18,353,421 | A/G            | 0                     | missense variant   | moderate   | 2                             |
|                      |     | 18,353,423 | 18,353,422 | -/TGGTGCAGACCA | 12                    | inframe insertion  | moderate   | 2                             |
|                      |     | 18,353,424 | 18,353,424 | T/C            | 0                     | missense variant   | moderate   | 2                             |
|                      |     | 18,353,427 | 18,353,427 | A/T            | 0                     | missense variant   | moderate   | 2                             |

VEP: Ensembl's variant effect predictor; n<sub>affected alleles</sub>: the number of alleles across the sequenced larvae in which the variant was observed.

| Zebrafish orthologue | Number of mutated alleles |    |   | Missing genotypes | Total | Non-missing | Mutant allele freq | $P_{HWE\_LR}$ |
|----------------------|---------------------------|----|---|-------------------|-------|-------------|--------------------|---------------|
|                      | 0                         | 1  | 2 |                   |       |             |                    |               |
| <i>lpar2a</i>        | 536                       | 11 | 0 | 5                 | 552   | 547         | 0.010              | 0.99          |
| <i>lpar2b</i>        | 540                       | 6  | 0 | 6                 | 552   | 546         | 0.005              | 0.02          |
| <i>gataad2ab</i>     | 515                       | 32 | 0 | 5                 | 552   | 547         | 0.029              | 0.47          |

The number of mutated alleles does not take into account the mutation's probability of affecting protein function. Dosage scores summed across both alleles were used in the association analyses. Four larvae were wildtype controls used to exclude variants that are inherently present from influencing the results, and five more larvae were excluded for having more than two missing calls across the seven successfully sequenced orthologues. Only genes for which some larvae were successfully mutated are shown.  $P_{HWE\_LR}$ :  $P$ -value for a Hardy-Weinberg equilibrium likelihood-ratio chi-squared statistic, considering a  $\pm 30$  base pair window around the CRISPR cut site as one locus.

**Supplementary Table 35 - The effect of a mutated allele in *lpar2a*, *lpar2b* and *gatad2ab* on body size**

|                       |                                  | Body length (n=505) |       |          |        |       |
|-----------------------|----------------------------------|---------------------|-------|----------|--------|-------|
|                       |                                  | Effect              | SE    | P        | lci    | uci   |
| <b>fixed factors</b>  | <i>lpar2a</i>                    | -0.016              | 0.243 | 9.47E-01 | -0.493 | 0.460 |
|                       | <i>lpar2b</i>                    | 1.075               | 0.490 | 2.80E-02 | 0.116  | 2.035 |
|                       | <i>gatad2ab</i>                  | -0.161              | 0.224 | 4.71E-01 | -0.600 | 0.277 |
|                       | age (11dpf vs. 10dpf)            | 0.301               | 0.101 | 2.94E-03 | 0.103  | 0.500 |
|                       | time of day (in hours since 9AM) | 0.000               | 0.019 | 9.79E-01 | -0.036 | 0.037 |
|                       | intercept                        | 0.114               | 0.290 | 6.95E-01 | -0.454 | 0.682 |
| <b>random factors</b> | <i>variance by batch</i>         | 0.779               | 0.025 | -        | 0.732  | 0.829 |
|                       | <i>residual</i>                  | 0.673               | 0.200 | -        | 0.376  | 1.204 |

  

|                       |                                  | Dorsal body surface area (n=505) |       |          |        |       |
|-----------------------|----------------------------------|----------------------------------|-------|----------|--------|-------|
|                       |                                  | Effect                           | SE    | P        | lci    | uci   |
| <b>fixed factors</b>  | <i>lpar2a</i>                    | 0.016                            | 0.263 | 9.53E-01 | -0.500 | 0.531 |
|                       | <i>lpar2b</i>                    | -0.831                           | 0.530 | 1.17E-01 | -1.869 | 0.207 |
|                       | <i>gatad2ab</i>                  | 0.825                            | 0.242 | 6.52E-04 | 0.351  | 1.299 |
|                       | age (11dpf vs. 10dpf)            | 0.214                            | 0.109 | 4.99E-02 | 0.000  | 0.429 |
|                       | time of day (in hours since 9AM) | 0.007                            | 0.020 | 7.45E-01 | -0.033 | 0.046 |
|                       | intercept                        | 0.012                            | 0.237 | 9.58E-01 | -0.452 | 0.477 |
| <b>random factors</b> | <i>variance by batch</i>         | 0.843                            | 0.027 | -        | 0.792  | 0.897 |
|                       | <i>residual</i>                  | 0.527                            | 0.158 | -        | 0.292  | 0.949 |

  

|                       |                                  | Lateral body surface area (n=502) |       |          |        |       |
|-----------------------|----------------------------------|-----------------------------------|-------|----------|--------|-------|
|                       |                                  | Effect                            | SE    | P        | lci    | uci   |
| <b>fixed factors</b>  | <i>lpar2a</i>                    | 0.281                             | 0.279 | 3.14E-01 | -0.265 | 0.827 |
|                       | <i>lpar2b</i>                    | 0.070                             | 0.561 | 9.01E-01 | -1.030 | 1.169 |
|                       | <i>gatad2ab</i>                  | 0.710                             | 0.256 | 5.59E-03 | 0.208  | 1.212 |
|                       | age (11dpf vs. 10dpf)            | 0.263                             | 0.115 | 2.27E-02 | 0.037  | 0.489 |
|                       | time of day (in hours since 9AM) | -0.040                            | 0.021 | 6.13E-02 | -0.082 | 0.002 |
|                       | intercept                        | 0.170                             | 0.213 | 4.26E-01 | -0.248 | 0.588 |
| <b>random factors</b> | <i>variance by batch</i>         | 0.892                             | 0.028 | -        | 0.839  | 0.950 |
|                       | <i>residual</i>                  | 0.454                             | 0.140 | -        | 0.248  | 0.831 |

  

|                       |                                  | Body volume (n=495) |       |          |        |       |
|-----------------------|----------------------------------|---------------------|-------|----------|--------|-------|
|                       |                                  | Effect              | SE    | P        | lci    | uci   |
| <b>fixed factors</b>  | <i>lpar2a</i>                    | 0.200               | 0.276 | 4.69E-01 | -0.341 | 0.740 |
|                       | <i>lpar2b</i>                    | 0.152               | 0.606 | 8.03E-01 | -1.037 | 1.340 |
|                       | <i>gatad2ab</i>                  | 0.924               | 0.254 | 2.72E-04 | 0.426  | 1.421 |
|                       | age (11dpf vs. 10dpf)            | 0.286               | 0.115 | 1.31E-02 | 0.060  | 0.512 |
|                       | time of day (in hours since 9AM) | -0.005              | 0.021 | 8.04E-01 | -0.047 | 0.037 |
|                       | intercept                        | 0.023               | 0.220 | 9.16E-01 | -0.408 | 0.454 |
| <b>random factors</b> | <i>variance by batch</i>         | 0.883               | 0.028 | -        | 0.830  | 0.940 |
|                       | <i>residual</i>                  | 0.474               | 0.146 | -        | 0.259  | 0.866 |

All outcomes were normalized for length using residuals, and inverse-normally transformed before the analysis. Associations were examined using hierarchical linear models. Effects shown are for the effect of carrying a mutated allele in *lpar2a*, *lpar2b* and *gatad2ab*, weighted by the allele's predicted effect on protein function (i.e. additive model, mutually adjusted). All associations were adjusted for age (i.e. 11 vs. 10 days post fertilization (dpf), time of day and batch. Lci and uci are lower and upper boundaries of the 95% confidence interval.

**Supplementary Table 36 - The effect of a mutated allele in *lpar2a*, *lpar2b* and *gatad2ab* on whole-body lipid**

|                |                                  | LDL cholesterol levels (n=513) |       |          |        |        |
|----------------|----------------------------------|--------------------------------|-------|----------|--------|--------|
|                |                                  | Effect                         | SE    | P        | lci    | uci    |
| fixed factors  | <i>lpar2a</i>                    | -0.607                         | 0.310 | 5.00E-02 | -1.215 | 0.000  |
|                | <i>lpar2b</i>                    | -0.539                         | 0.724 | 4.57E-01 | -1.959 | 0.881  |
|                | <i>gatad2ab</i>                  | -0.159                         | 0.262 | 5.45E-01 | -0.673 | 0.356  |
|                | age (11dpf vs. 10dpf)            | -0.263                         | 0.121 | 2.98E-02 | -0.500 | -0.026 |
|                | time of day (in hours since 9AM) | 0.010                          | 0.024 | 6.86E-01 | -0.037 | 0.056  |
|                | intercept                        | 0.108                          | 0.160 | 5.01E-01 | -0.206 | 0.422  |
| random factors | <i>variance by batch</i>         | 0.946                          | 0.030 | -        | 0.889  | 1.006  |
|                | <i>residual</i>                  | 0.284                          | 0.101 | -        | 0.141  | 0.572  |

|                |                                  | HDL cholesterol levels (n=513) |       |          |        |       |
|----------------|----------------------------------|--------------------------------|-------|----------|--------|-------|
|                |                                  | Effect                         | SE    | P        | lci    | uci   |
| fixed factors  | <i>lpar2a</i>                    | -0.346                         | 0.318 | 2.77E-01 | -0.970 | 0.278 |
|                | <i>lpar2b</i>                    | -1.264                         | 0.744 | 8.96E-02 | -2.723 | 0.195 |
|                | <i>gatad2ab</i>                  | -0.486                         | 0.269 | 7.11E-02 | -1.014 | 0.042 |
|                | age (11dpf vs. 10dpf)            | -0.122                         | 0.122 | 3.17E-01 | -0.362 | 0.117 |
|                | time of day (in hours since 9AM) | 0.020                          | 0.024 | 4.03E-01 | -0.027 | 0.067 |
|                | intercept                        | -0.059                         | 0.144 | 6.81E-01 | -0.341 | 0.223 |
| random factors | <i>variance by batch</i>         | 0.972                          | 0.031 | -        | 0.914  | 1.034 |
|                | <i>residual</i>                  | 0.218                          | 0.084 | -        | 0.103  | 0.462 |

|                |                                  | Triglyceride levels (n=513) |       |          |        |        |
|----------------|----------------------------------|-----------------------------|-------|----------|--------|--------|
|                |                                  | Effect                      | SE    | P        | lci    | uci    |
| fixed factors  | <i>lpar2a</i>                    | -0.652                      | 0.278 | 1.92E-02 | -1.197 | -0.106 |
|                | <i>lpar2b</i>                    | -0.001                      | 0.650 | 9.99E-01 | -1.276 | 1.274  |
|                | <i>gatad2ab</i>                  | 0.394                       | 0.236 | 9.45E-02 | -0.068 | 0.857  |
|                | age (11dpf vs. 10dpf)            | 0.007                       | 0.111 | 9.52E-01 | -0.210 | 0.224  |
|                | time of day (in hours since 9AM) | 0.085                       | 0.022 | 7.12E-05 | 0.043  | 0.128  |
|                | intercept                        | -0.328                      | 0.232 | 1.57E-01 | -0.783 | 0.126  |
| random factors | <i>variance by batch</i>         | 0.849                       | 0.027 | -        | 0.798  | 0.903  |
|                | <i>residual</i>                  | 0.512                       | 0.156 | -        | 0.282  | 0.929  |

|                |                                  | Total cholesterol levels (n=513) |       |          |        |        |
|----------------|----------------------------------|----------------------------------|-------|----------|--------|--------|
|                |                                  | Effect                           | SE    | P        | lci    | uci    |
| fixed factors  | <i>lpar2a</i>                    | -0.739                           | 0.306 | 1.58E-02 | -1.340 | -0.139 |
|                | <i>lpar2b</i>                    | 0.369                            | 0.716 | 6.07E-01 | -1.035 | 1.773  |
|                | <i>gatad2ab</i>                  | 0.118                            | 0.260 | 6.48E-01 | -0.390 | 0.627  |
|                | age (11dpf vs. 10dpf)            | -0.487                           | 0.120 | 4.89E-05 | -0.722 | -0.252 |
|                | time of day (in hours since 9AM) | 0.018                            | 0.023 | 4.39E-01 | -0.028 | 0.064  |
|                | intercept                        | 0.034                            | 0.166 | 8.37E-01 | -0.291 | 0.360  |
| random factors | <i>variance by batch</i>         | 0.935                            | 0.029 | -        | 0.879  | 0.994  |
|                | <i>residual</i>                  | 0.306                            | 0.105 | -        | 0.156  | 0.598  |

|                       |                                  | Glucose levels (n=513) |       |          |        |        |
|-----------------------|----------------------------------|------------------------|-------|----------|--------|--------|
|                       |                                  | Effect                 | SE    | P        | lci    | uci    |
| <b>fixed factors</b>  | <i>lpar2a</i>                    | -0.146                 | 0.308 | 6.36E-01 | -0.748 | 0.457  |
|                       | <i>lpar2b</i>                    | -0.001                 | 0.719 | 9.99E-01 | -1.410 | 1.408  |
|                       | <i>gatad2ab</i>                  | -0.371                 | 0.260 | 1.55E-01 | -0.881 | 0.140  |
|                       | age (11dpf vs. 10dpf)            | 0.147                  | 0.120 | 2.23E-01 | -0.089 | 0.383  |
|                       | time of day (in hours since 9AM) | -0.080                 | 0.024 | 6.71E-04 | -0.126 | -0.034 |
|                       | intercept                        | 0.240                  | 0.168 | 1.53E-01 | -0.089 | 0.569  |
| <b>random factors</b> | <i>variance by batch</i>         | 0.938                  | 0.029 | -        | 0.882  | 0.998  |
|                       | <i>residual</i>                  | 0.311                  | 0.103 | -        | 0.162  | 0.594  |

All outcomes were normalized for protein level using residuals, and inverse-normally transformed before the analysis. Associations were examined using hierarchical linear models. Effects shown are for the effect of carrying a mutated allele in *lpar2a*, *lpar2b* and *gatad2ab*, weighted by the allele's predicted effect on protein function (i.e. additive model, mutually adjusted). Associations were adjusted for age (i.e. 11 vs. 10 days post fertilization (dpf), time of day and batch. Lci and uci are lower and upper boundaries of the 95% confidence interval.



Supplementary Table 37 - The effect of a mutated allele in *lpar2a*, *lpar2b* and *gatad2ab* on vascular atherogenic traits

|                             |                                  | Vascular lipid deposition |       |          |        |        |                 |       |          |        |        |                 |          |          |        |       |
|-----------------------------|----------------------------------|---------------------------|-------|----------|--------|--------|-----------------|-------|----------|--------|--------|-----------------|----------|----------|--------|-------|
|                             |                                  | Model 1 (n=280)           |       |          |        |        | Model 2 (n=258) |       |          |        |        | Model 3 (n=233) |          |          |        |       |
|                             |                                  | Effect                    | SE    | P        | lci    | uci    | Effect          | SE    | P        | lci    | uci    | Effect          | SE       | P        | lci    | uci   |
| negative binomial terms     | <i>lpar2a</i>                    | 1.870                     | 1.003 | 6.23E-02 | -0.096 | 3.836  | 1.622           | 1.001 | 1.05E-01 | -0.340 | 3.584  | 1.795           | 0.995    | 7.13E-02 | -0.156 | 3.746 |
|                             | <i>lpar2b</i>                    | 0.994                     | 1.191 | 4.04E-01 | -1.340 | 3.328  | 0.861           | 1.139 | 4.50E-01 | -1.371 | 3.093  | 0.912           | 1.351    | 5.00E-01 | -1.736 | 3.560 |
|                             | <i>gatad2ab</i>                  | -0.006                    | 0.334 | 9.87E-01 | -0.659 | 0.648  | -0.058          | 0.316 | 8.55E-01 | -0.676 | 0.561  | -0.277          | 0.313    | 3.75E-01 | -0.890 | 0.336 |
|                             | body length (in SD)              | -                         | -     | -        | -      | -      | 0.152           | 0.116 | 1.92E-01 | -0.076 | 0.379  | 0.194           | 0.126    | 1.24E-01 | -0.054 | 0.442 |
|                             | dorsal body surface area (in SD) | -                         | -     | -        | -      | -      | 0.153           | 0.131 | 2.44E-01 | -0.104 | 0.410  | 0.202           | 0.139    | 1.46E-01 | -0.070 | 0.474 |
|                             | age (11dpf vs. 10dpf)            | 0.263                     | 0.503 | 6.01E-01 | -0.722 | 1.249  | 0.328           | 0.497 | 5.09E-01 | -0.646 | 1.302  | 0.229           | 0.462    | 6.20E-01 | -0.677 | 1.136 |
|                             | time of day (in hours since 9AM) | -0.079                    | 0.038 | 4.00E-02 | -0.154 | -0.004 | -0.075          | 0.041 | 7.06E-02 | -0.156 | 0.006  | -0.045          | 0.052    | 3.93E-01 | -0.147 | 0.058 |
|                             | batch 1                          | 3.239                     | 0.635 | 3.42E-07 | 1.994  | 4.484  | 3.299           | 0.621 | 1.09E-07 | 2.082  | 4.517  | 3.364           | 0.580    | 6.46E-09 | 2.228  | 4.500 |
|                             | batch 2                          | 4.939                     | 0.746 | 3.50E-11 | 3.477  | 6.400  | 4.771           | 0.782 | 1.03E-09 | 3.239  | 6.304  | 4.686           | 0.744    | 3.00E-10 | 3.228  | 6.144 |
|                             | batch 3                          | 4.581                     | 0.725 | 2.66E-10 | 3.160  | 6.003  | 4.361           | 0.749 | 5.83E-09 | 2.893  | 5.829  | 4.486           | 0.683    | 4.99E-11 | 3.148  | 5.824 |
|                             | batch 4                          | 3.656                     | 0.738 | 7.39E-07 | 2.209  | 5.103  | 3.855           | 0.726 | 1.11E-07 | 2.431  | 5.279  | 3.953           | 0.653    | 1.46E-09 | 2.672  | 5.234 |
|                             | batch 5                          | 3.903                     | 0.732 | 9.59E-08 | 2.469  | 5.337  | 3.705           | 0.751 | 8.02E-07 | 2.233  | 5.176  | 3.635           | 0.689    | 1.31E-07 | 2.285  | 4.985 |
|                             | intercept                        | 0.802                     | 0.720 | 2.65E-01 | -0.609 | 2.212  | 0.766           | 0.702 | 2.75E-01 | -0.610 | 2.143  | 0.597           | 0.639    | 3.50E-01 | -0.656 | 1.850 |
|                             | HDL cholesterol levels (in SD)   | -                         | -     | -        | -      | -      | -               | -     | -        | -      | -      | -0.189          | 0.096    | 4.94E-02 | -0.377 | 0.000 |
|                             | LDL cholesterol levels (in SD)   | -                         | -     | -        | -      | -      | -               | -     | -        | -      | -      | 0.084           | 0.075    | 2.65E-01 | -0.063 | 0.231 |
| glucose levels (in SD)      | -                                | -                         | -     | -        | -      | -      | -               | -     | -        | -      | 0.070  | 0.105           | 5.09E-01 | -0.137   | 0.276  |       |
| triglyceride levels (in SD) | -                                | -                         | -     | -        | -      | -      | -               | -     | -        | -      | -0.016 | 0.108           | 8.82E-01 | -0.227   | 0.195  |       |

  

|               |                                  | Vascular infiltration by macrophages |       |          |        |       |                 |       |          |          |        |                 |       |          |          |        |       |
|---------------|----------------------------------|--------------------------------------|-------|----------|--------|-------|-----------------|-------|----------|----------|--------|-----------------|-------|----------|----------|--------|-------|
|               |                                  | Model 1 (n=363)                      |       |          |        |       | Model 2 (n=331) |       |          |          |        | Model 3 (n=305) |       |          |          |        |       |
|               |                                  | Effect                               | SE    | P        | lci    | uci   | Effect          | SE    | P        | lci      | uci    | Effect          | SE    | P        | lci      | uci    |       |
| fixed factors | <i>lpar2a</i>                    | 0.307                                | 0.374 | 4.12E-01 | -0.426 | 1.041 | 363             | 0.282 | 0.368    | 4.44E-01 | -0.440 | 1.003           | 0.238 | 0.420    | 5.70E-01 | -0.584 | 1.061 |
|               | <i>lpar2b</i>                    | 0.528                                | 0.520 | 3.09E-01 | -0.490 | 1.546 | 0.597           | 0.512 | 2.43E-01 | -0.406   | 1.601  | 0.649           | 0.636 | 3.08E-01 | -0.598   | 1.896  |       |
|               | <i>gatad2ab</i>                  | 0.404                                | 0.254 | 1.11E-01 | -0.093 | 0.902 | 0.472           | 0.261 | 7.08E-02 | -0.040   | 0.984  | 0.458           | 0.267 | 8.68E-02 | -0.066   | 0.982  |       |
|               | body length (in SD)              | -                                    | -     | -        | -      | -     | 0.020           | 0.059 | 7.38E-01 | -0.096   | 0.136  | 0.029           | 0.062 | 6.36E-01 | -0.092   | 0.150  |       |
|               | dorsal body surface area (in SD) | -                                    | -     | -        | -      | -     | 0.077           | 0.055 | 1.63E-01 | -0.031   | 0.186  | 0.056           | 0.057 | 3.28E-01 | -0.056   | 0.168  |       |
|               | age (11dpf vs. 10dpf)            | -0.149                               | 0.151 | 3.24E-01 | -0.445 | 0.147 | -0.146          | 0.148 | 3.25E-01 | -0.436   | 0.144  | -0.124          | 0.147 | 3.97E-01 | -0.411   | 0.163  |       |
|               | time of day (in hours since 9AM) | 0.042                                | 0.023 | 6.53E-02 | -0.003 | 0.086 | 0.043           | 0.023 | 6.58E-02 | -0.003   | 0.088  | 0.010           | 0.027 | 7.21E-01 | -0.043   | 0.063  |       |
|               | intercept                        | -0.101                               | 0.172 | 5.56E-01 | -0.438 | 0.235 | -0.139          | 0.169 | 4.12E-01 | -0.470   | 0.193  | -0.029          | 0.157 | 8.55E-01 | -0.336   | 0.278  |       |
|               | HDL cholesterol levels (in SD)   | -                                    | -     | -        | -      | -     | -               | -     | -        | -        | -      | -0.001          | 0.048 | 9.81E-01 | -0.095   | 0.092  |       |
|               | LDL cholesterol levels (in SD)   | -                                    | -     | -        | -      | -     | -               | -     | -        | -        | -      | -0.012          | 0.046 | 7.88E-01 | -0.103   | 0.078  |       |
|               | glucose levels (in SD)           | -                                    | -     | -        | -      | -     | -               | -     | -        | -        | -      | -0.021          | 0.052 | 6.84E-01 | -0.123   | 0.080  |       |
|               | triglyceride levels (in SD)      | -                                    | -     | -        | -      | -     | -               | -     | -        | -        | -      | 0.094           | 0.057 | 9.68E-02 | -0.017   | 0.205  |       |

  

| random factors | Vascular lipid deposition |       |       |     |       |        |       |       |     |       |        |       |       |     |       |       |
|----------------|---------------------------|-------|-------|-----|-------|--------|-------|-------|-----|-------|--------|-------|-------|-----|-------|-------|
|                | Effect                    | SE    | P     | lci | uci   | Effect | SE    | P     | lci | uci   | Effect | SE    | P     | lci | uci   |       |
|                | <i>intercept</i>          | 0.822 | 0.031 | -   | 0.764 | 0.885  | 0.805 | 0.032 | -   | 0.746 | 0.870  | 0.812 | 0.033 | -   | 0.749 | 0.879 |
|                | <i>variation by batch</i> | 0.311 | 0.103 | -   | 0.162 | 0.595  | 0.294 | 0.099 | -   | 0.151 | 0.569  | 0.218 | 0.086 | -   | 0.100 | 0.474 |

continued Supplementary Table 37

|                             |                                  | Vascular co-localization of lipids with macrophages |       |          |        |        |                 |       |          |        |        |                 |          |          |        |       |
|-----------------------------|----------------------------------|-----------------------------------------------------|-------|----------|--------|--------|-----------------|-------|----------|--------|--------|-----------------|----------|----------|--------|-------|
|                             |                                  | Model 1 (n=263)                                     |       |          |        |        | Model 2 (n=241) |       |          |        |        | Model 3 (n=217) |          |          |        |       |
|                             |                                  | Effect                                              | SE    | P        | lci    | uci    | Effect          | SE    | P        | lci    | uci    | Effect          | SE       | P        | lci    | uci   |
| negative binomial terms     | <i>lpar2a</i>                    | 3.463                                               | 1.204 | 4.02E-03 | 1.103  | 5.823  | 3.511           | 1.207 | 3.63E-03 | 1.145  | 5.877  | 3.408           | 1.167    | 3.50E-03 | 1.120  | 5.696 |
|                             | <i>lpar2b</i>                    | 0.851                                               | 1.083 | 4.32E-01 | -1.270 | 2.973  | 0.747           | 1.018 | 4.63E-01 | -1.248 | 2.743  | 0.284           | 1.368    | 8.35E-01 | -2.396 | 2.965 |
|                             | <i>gataad2ab</i>                 | 0.248                                               | 0.491 | 6.13E-01 | -0.714 | 1.210  | 0.495           | 0.518 | 3.39E-01 | -0.520 | 1.509  | 0.404           | 0.582    | 4.87E-01 | -0.737 | 1.545 |
|                             | body length (in SD)              | -                                                   | -     | -        | -      | -      | 0.101           | 0.190 | 5.94E-01 | -0.271 | 0.473  | 0.223           | 0.197    | 2.57E-01 | -0.162 | 0.609 |
|                             | dorsal body surface area (in SD) | -                                                   | -     | -        | -      | -      | -0.063          | 0.179 | 7.25E-01 | -0.414 | 0.288  | 0.059           | 0.200    | 7.70E-01 | -0.334 | 0.452 |
|                             | age (11dpf vs. 10dpf)            | 0.248                                               | 0.642 | 6.99E-01 | -1.010 | 1.506  | 0.261           | 0.634 | 6.81E-01 | -0.981 | 1.502  | -0.196          | 0.678    | 7.73E-01 | -1.524 | 1.133 |
|                             | time of day (in hours since 9AM) | -0.129                                              | 0.054 | 1.65E-02 | -0.235 | -0.024 | -0.150          | 0.060 | 1.17E-02 | -0.267 | -0.033 | -0.124          | 0.087    | 1.55E-01 | -0.294 | 0.047 |
|                             | batch 1                          | 4.433                                               | 0.824 | 7.38E-08 | 2.819  | 6.048  | 4.418           | 0.831 | 1.06E-07 | 2.789  | 6.048  | 4.521           | 0.825    | 4.31E-08 | 2.904  | 6.139 |
|                             | batch 2                          | 5.985                                               | 0.974 | 7.89E-10 | 4.076  | 7.893  | 5.875           | 0.994 | 3.37E-09 | 3.928  | 7.823  | 5.222           | 1.122    | 3.25E-06 | 3.023  | 7.422 |
|                             | batch 3                          | 5.635                                               | 0.928 | 1.28E-09 | 3.815  | 7.454  | 5.649           | 0.948 | 2.51E-09 | 3.792  | 7.507  | 5.258           | 1.068    | 8.46E-07 | 3.165  | 7.351 |
|                             | batch 4                          | 4.252                                               | 1.026 | 3.40E-05 | 2.241  | 6.262  | 4.352           | 1.082 | 5.73E-05 | 2.232  | 6.472  | 4.120           | 1.109    | 2.02E-04 | 1.947  | 6.293 |
|                             | batch 5                          | 4.694                                               | 0.939 | 5.84E-07 | 2.853  | 6.535  | 4.494           | 0.969 | 3.55E-06 | 2.594  | 6.394  | 4.039           | 1.033    | 9.29E-05 | 2.014  | 6.065 |
|                             | intercept                        | -1.384                                              | 0.956 | 1.48E-01 | -3.258 | 0.490  | -1.303          | 0.965 | 1.77E-01 | -3.195 | 0.589  | -1.141          | 1.126    | 3.11E-01 | -3.348 | 1.066 |
|                             | HDL cholesterol levels (in SD)   | -                                                   | -     | -        | -      | -      | -               | -     | -        | -      | -      | -0.098          | 0.139    | 4.82E-01 | -0.371 | 0.175 |
|                             | LDL cholesterol levels (in SD)   | -                                                   | -     | -        | -      | -      | -               | -     | -        | -      | -      | 0.105           | 0.107    | 3.23E-01 | -0.104 | 0.314 |
| glucose levels (in SD)      | -                                | -                                                   | -     | -        | -      | -      | -               | -     | -        | -      | -0.274 | 0.167           | 1.01E-01 | -0.601   | 0.053  |       |
| triglyceride levels (in SD) | -                                | -                                                   | -     | -        | -      | -      | -               | -     | -        | -      | -0.170 | 0.139           | 2.22E-01 | -0.442   | 0.103  |       |

  

|               |                                  | Vascular infiltration by neutrophils |       |          |        |       |                 |       |          |        |       |                 |       |          |        |        |
|---------------|----------------------------------|--------------------------------------|-------|----------|--------|-------|-----------------|-------|----------|--------|-------|-----------------|-------|----------|--------|--------|
|               |                                  | Model 1 (n=363)                      |       |          |        |       | Model 2 (n=334) |       |          |        |       | Model 3 (n=307) |       |          |        |        |
|               |                                  | Effect                               | SE    | P        | lci    | uci   | Effect          | SE    | P        | lci    | uci   | Effect          | SE    | P        | lci    | uci    |
| fixed factors | <i>lpar2a</i>                    | 0.743                                | 0.387 | 5.46E-02 | -0.015 | 1.501 | 0.678           | 0.386 | 7.89E-02 | -0.078 | 1.435 | 0.566           | 0.423 | 1.80E-01 | -0.262 | 1.395  |
|               | <i>lpar2b</i>                    | 0.130                                | 0.537 | 8.09E-01 | -0.922 | 1.182 | 0.035           | 0.538 | 9.48E-01 | -1.019 | 1.090 | 0.045           | 0.642 | 9.44E-01 | -1.213 | 1.303  |
|               | <i>gataad2ab</i>                 | -0.315                               | 0.267 | 2.38E-01 | -0.837 | 0.208 | -0.452          | 0.278 | 1.04E-01 | -0.996 | 0.093 | -0.353          | 0.274 | 1.97E-01 | -0.889 | 0.183  |
|               | body length (in SD)              | -                                    | -     | -        | -      | -     | 0.145           | 0.061 | 1.76E-02 | 0.025  | 0.264 | 0.197           | 0.063 | 1.72E-03 | 0.074  | 0.320  |
|               | dorsal body surface area (in SD) | -                                    | -     | -        | -      | -     | 0.053           | 0.059 | 3.68E-01 | -0.062 | 0.168 | 0.016           | 0.060 | 7.88E-01 | -0.101 | 0.134  |
|               | age (11dpf vs. 10dpf)            | -0.120                               | 0.152 | 4.30E-01 | -0.418 | 0.178 | -0.157          | 0.150 | 2.97E-01 | -0.451 | 0.138 | -0.159          | 0.150 | 2.89E-01 | -0.453 | 0.135  |
|               | time of day (in hours since 9AM) | 0.025                                | 0.023 | 2.83E-01 | -0.021 | 0.070 | 0.025           | 0.024 | 2.92E-01 | -0.022 | 0.072 | 0.019           | 0.027 | 4.92E-01 | -0.034 | 0.072  |
|               | intercept                        | 0.033                                | 0.195 | 8.65E-01 | -0.348 | 0.415 | 0.023           | 0.179 | 9.00E-01 | -0.329 | 0.374 | 0.038           | 0.186 | 8.36E-01 | -0.325 | 0.402  |
|               | HDL cholesterol levels (in SD)   | -                                    | -     | -        | -      | -     | -               | -     | -        | -      | -     | 0.029           | 0.048 | 5.54E-01 | -0.066 | 0.123  |
|               | LDL cholesterol levels (in SD)   | -                                    | -     | -        | -      | -     | -               | -     | -        | -      | -     | -0.135          | 0.046 | 3.67E-03 | -0.226 | -0.044 |
|               | glucose levels (in SD)           | -                                    | -     | -        | -      | -     | -               | -     | -        | -      | -     | 0.033           | 0.052 | 5.35E-01 | -0.070 | 0.135  |
|               | triglyceride levels (in SD)      | -                                    | -     | -        | -      | -     | -               | -     | -        | -      | -     | -0.049          | 0.057 | 3.88E-01 | -0.160 | 0.062  |

  

|                |                           |       |       |   |       |       |       |       |   |       |       |       |       |   |       |       |
|----------------|---------------------------|-------|-------|---|-------|-------|-------|-------|---|-------|-------|-------|-------|---|-------|-------|
| random factors | <i>intercept</i>          | 0.849 | 0.032 | - | 0.789 | 0.914 | 0.846 | 0.033 | - | 0.783 | 0.913 | 0.818 | 0.033 | - | 0.755 | 0.886 |
|                | <i>variation by batch</i> | 0.379 | 0.121 | - | 0.202 | 0.710 | 0.320 | 0.111 | - | 0.162 | 0.630 | 0.329 | 0.114 | - | 0.167 | 0.649 |

continued Supplementary Table 37

|                             |                                  | Vascular co-localization of lipids with neutrophils |       |          |        |       |                 |       |          |        |        |                 |          |          |        |        |
|-----------------------------|----------------------------------|-----------------------------------------------------|-------|----------|--------|-------|-----------------|-------|----------|--------|--------|-----------------|----------|----------|--------|--------|
|                             |                                  | Model 1 (n=260)                                     |       |          |        |       | Model 2 (n=242) |       |          |        |        | Model 3 (n=217) |          |          |        |        |
|                             |                                  | Effect                                              | SE    | P        | lci    | uci   | Effect          | SE    | P        | lci    | uci    | Effect          | SE       | P        | lci    | uci    |
| negative binomial terms     | <i>lpar2a</i>                    | 2.718                                               | 1.321 | 3.96E-02 | 0.129  | 5.307 | 2.614           | 1.314 | 4.67E-02 | 0.038  | 5.189  | 3.548           | 1.292    | 6.03E-03 | 1.016  | 6.081  |
|                             | <i>lpar2b</i>                    | -0.034                                              | 1.109 | 9.75E-01 | -2.207 | 2.139 | -0.260          | 1.167 | 8.24E-01 | -2.547 | 2.027  | -2.627          | 1.687    | 1.20E-01 | -5.934 | 0.681  |
|                             | <i>gata2ab</i>                   | -1.383                                              | 1.031 | 1.80E-01 | -3.403 | 0.638 | -1.613          | 1.014 | 1.12E-01 | -3.601 | 0.375  | -2.236          | 1.025    | 2.91E-02 | -4.245 | -0.227 |
|                             | body length (in SD)              | -                                                   | -     | -        | -      | -     | 0.260           | 0.182 | 1.53E-01 | -0.097 | 0.617  | 0.178           | 0.185    | 3.37E-01 | -0.185 | 0.542  |
|                             | dorsal body surface area (in SD) | -                                                   | -     | -        | -      | -     | 0.077           | 0.182 | 6.72E-01 | -0.280 | 0.434  | 0.000           | 0.187    | 9.98E-01 | -0.367 | 0.368  |
|                             | age (11dpf vs. 10dpf)            | 0.838                                               | 0.610 | 1.69E-01 | -0.357 | 2.033 | 0.853           | 0.608 | 1.60E-01 | -0.338 | 2.044  | 0.390           | 0.632    | 5.38E-01 | -0.849 | 1.628  |
|                             | time of day (in hours since 9AM) | -0.126                                              | 0.069 | 6.76E-02 | -0.262 | 0.009 | -0.134          | 0.068 | 4.74E-02 | -0.267 | -0.002 | -0.219          | 0.078    | 5.16E-03 | -0.372 | -0.065 |
|                             | batch 1                          | 3.057                                               | 1.022 | 2.78E-03 | 1.054  | 5.060 | 3.136           | 0.981 | 1.39E-03 | 1.213  | 5.059  | 3.287           | 0.840    | 9.06E-05 | 1.641  | 4.933  |
|                             | batch 2                          | 4.126                                               | 1.202 | 5.98E-04 | 1.770  | 6.482 | 3.865           | 1.213 | 1.44E-03 | 1.488  | 6.243  | 4.036           | 1.086    | 2.01E-04 | 1.908  | 6.164  |
|                             | batch 3                          | 3.450                                               | 1.162 | 2.99E-03 | 1.173  | 5.727 | 3.265           | 1.137 | 4.09E-03 | 1.036  | 5.494  | 3.350           | 1.010    | 9.10E-04 | 1.371  | 5.330  |
|                             | batch 4                          | 3.911                                               | 1.181 | 9.27E-04 | 1.596  | 6.225 | 4.210           | 1.145 | 2.36E-04 | 1.966  | 6.453  | 4.467           | 0.971    | 4.21E-06 | 2.564  | 6.370  |
|                             | batch 5                          | 2.912                                               | 1.171 | 1.29E-02 | 0.617  | 5.208 | 3.073           | 1.122 | 6.16E-03 | 0.874  | 5.272  | 3.193           | 0.965    | 9.33E-04 | 1.303  | 5.084  |
|                             | intercept                        | -1.356                                              | 1.157 | 2.41E-01 | -3.624 | 0.911 | -1.388          | 1.105 | 2.09E-01 | -3.554 | 0.778  | -1.071          | 0.999    | 2.83E-01 | -3.029 | 0.886  |
|                             | HDL cholesterol levels (in SD)   | -                                                   | -     | -        | -      | -     | -               | -     | -        | -      | -      | -0.312          | 0.165    | 5.79E-02 | -0.635 | 0.010  |
|                             | LDL cholesterol levels (in SD)   | -                                                   | -     | -        | -      | -     | -               | -     | -        | -      | -      | 0.088           | 0.132    | 5.05E-01 | -0.171 | 0.347  |
| glucose levels (in SD)      | -                                | -                                                   | -     | -        | -      | -     | -               | -     | -        | -      | 0.134  | 0.145           | 3.53E-01 | -0.149   | 0.417  |        |
| triglyceride levels (in SD) | -                                | -                                                   | -     | -        | -      | -     | -               | -     | -        | -      | 0.135  | 0.171           | 4.30E-01 | -0.200   | 0.471  |        |

|                             |                                  | Vascular co-localization of macrophages with neutrophils |       |          |        |       |                 |       |          |        |        |                 |          |          |        |        |
|-----------------------------|----------------------------------|----------------------------------------------------------|-------|----------|--------|-------|-----------------|-------|----------|--------|--------|-----------------|----------|----------|--------|--------|
|                             |                                  | Model 1 (n=345)                                          |       |          |        |       | Model 2 (n=317) |       |          |        |        | Model 3 (n=291) |          |          |        |        |
|                             |                                  | Effect                                                   | SE    | P        | lci    | uci   | Effect          | SE    | P        | lci    | uci    | Effect          | SE       | P        | lci    | uci    |
| negative binomial terms     | <i>lpar2a</i>                    | 0.219                                                    | 0.301 | 4.67E-01 | -0.371 | 0.808 | 0.185           | 0.304 | 5.44E-01 | -0.411 | 0.781  | 0.023           | 0.315    | 9.41E-01 | -0.594 | 0.641  |
|                             | <i>lpar2b</i>                    | -0.073                                                   | 0.473 | 8.77E-01 | -1.000 | 0.853 | 0.022           | 0.452 | 9.62E-01 | -0.864 | 0.907  | 0.225           | 0.513    | 6.61E-01 | -0.780 | 1.229  |
|                             | <i>gata2ab</i>                   | -0.409                                                   | 0.357 | 2.52E-01 | -1.108 | 0.290 | -0.514          | 0.417 | 2.18E-01 | -1.330 | 0.303  | -0.676          | 0.384    | 7.84E-02 | -1.429 | 0.077  |
|                             | body length (in SD)              | -                                                        | -     | -        | -      | -     | -0.084          | 0.073 | 2.49E-01 | -0.226 | 0.059  | -0.027          | 0.077    | 7.29E-01 | -0.177 | 0.124  |
|                             | dorsal body surface area (in SD) | -                                                        | -     | -        | -      | -     | 0.100           | 0.066 | 1.26E-01 | -0.028 | 0.229  | 0.096           | 0.068    | 1.60E-01 | -0.038 | 0.230  |
|                             | age (11dpf vs. 10dpf)            | -0.209                                                   | 0.165 | 2.05E-01 | -0.532 | 0.114 | -0.186          | 0.165 | 2.59E-01 | -0.510 | 0.137  | -0.199          | 0.174    | 2.51E-01 | -0.540 | 0.141  |
|                             | time of day (in hours since 9AM) | 0.019                                                    | 0.028 | 4.97E-01 | -0.036 | 0.075 | 0.021           | 0.029 | 4.65E-01 | -0.035 | 0.077  | 0.030           | 0.032    | 3.60E-01 | -0.034 | 0.093  |
|                             | batch 1                          | 0.026                                                    | 0.176 | 8.83E-01 | -0.318 | 0.370 | 0.084           | 0.178 | 6.39E-01 | -0.266 | 0.433  | 0.038           | 0.205    | 8.54E-01 | -0.365 | 0.440  |
|                             | batch 2                          | 0.491                                                    | 0.255 | 5.39E-02 | -0.008 | 0.991 | 0.528           | 0.311 | 8.94E-02 | -0.081 | 1.137  | 0.512           | 0.349    | 1.43E-01 | -0.173 | 1.196  |
|                             | batch 3                          | 1.144                                                    | 0.236 | 1.26E-06 | 0.681  | 1.606 | 1.137           | 0.267 | 2.00E-05 | 0.615  | 1.660  | 1.223           | 0.314    | 9.78E-05 | 0.608  | 1.838  |
|                             | batch 4                          | -0.467                                                   | 0.259 | 7.09E-02 | -0.975 | 0.040 | -0.514          | 0.258 | 4.65E-02 | -1.021 | -0.008 | -0.560          | 0.255    | 2.78E-02 | -1.059 | -0.061 |
|                             | batch 5                          | -0.311                                                   | 0.228 | 1.73E-01 | -0.758 | 0.136 | -0.313          | 0.238 | 1.88E-01 | -0.779 | 0.153  | -0.299          | 0.264    | 2.58E-01 | -0.816 | 0.219  |
|                             | intercept                        | 4.047                                                    | 0.208 | 1.95E-84 | 3.639  | 4.454 | 4.021           | 0.211 | 8.39E-81 | 3.607  | 4.435  | 3.978           | 0.253    | 7.40E-56 | 3.483  | 4.473  |
|                             | HDL cholesterol levels (in SD)   | -                                                        | -     | -        | -      | -     | -               | -     | -        | -      | -      | -0.035          | 0.054    | 5.11E-01 | -0.141 | 0.070  |
|                             | LDL cholesterol levels (in SD)   | -                                                        | -     | -        | -      | -     | -               | -     | -        | -      | -      | -0.105          | 0.060    | 7.96E-02 | -0.222 | 0.012  |
| glucose levels (in SD)      | -                                | -                                                        | -     | -        | -      | -     | -               | -     | -        | -      | -0.005 | 0.062           | 9.36E-01 | -0.126   | 0.116  |        |
| triglyceride levels (in SD) | -                                | -                                                        | -     | -        | -      | -     | -               | -     | -        | -      | -0.024 | 0.072           | 7.35E-01 | -0.166   | 0.117  |        |

Associations were examined using negative binomial regression for outcomes that showed a negative binomial distribution; and using hierarchical linear models on inverse-normally transformed outcomes for outcomes that were (borderline) normally distributed (i.e. vascular accumulation of macrophages and neutrophils). Effects shown are for the effect of carrying a mutated allele in *lpar2a*, *lpar2b* and *gata2ab*, weighted by the allele's predicted effect on protein function (i.e. additive model, mutually adjusted). Model 1: adjusted for time of day and batch; Model 2: additionally adjusted for body length and dorsal body surface area normalized for length; Model 3: additionally adjusted for whole-body LDL cholesterol, HDL cholesterol, triglyceride and glucose levels normalized for protein level. Lci and uci are lower and upper boundaries of the 95% confidence interval.

Supplementary Table 38 - The effect of a mutated allele in *lpar2a*, *lpar2b* and *gatad2ab* on image and image quantification quality

|                                  | Region of interest not detected                                                                                           |       |          |       |       |                 |       |          |       |        |                 |       |          |       |        |
|----------------------------------|---------------------------------------------------------------------------------------------------------------------------|-------|----------|-------|-------|-----------------|-------|----------|-------|--------|-----------------|-------|----------|-------|--------|
|                                  | Model 1 (n=297)                                                                                                           |       |          |       |       | Model 2 (n=276) |       |          |       |        | Model 3 (n=253) |       |          |       |        |
|                                  | Effect                                                                                                                    | SE    | P        | lci   | uci   | Effect          | SE    | P        | lci   | uci    | Effect          | SE    | P        | lci   | uci    |
| <i>lpar2a</i>                    | 1.021                                                                                                                     | 1.184 | 9.85E-01 | 0.105 | 9.899 | 3.326           | 4.200 | 3.41E-01 | 0.280 | 39.519 | 2.918           | 3.880 | 4.21E-01 | 0.215 | 39.528 |
| <i>lpar2b</i>                    | all 39 larvae with an undetected vessel are wildtype for mutations in <i>lpar2b</i> ; 0.74 mutant larvae were expected.   |       |          |       |       |                 |       |          |       |        |                 |       |          |       |        |
| <i>gatad2ab</i>                  | all 39 larvae with an undetected vessel are wildtype for mutations in <i>gatad2ab</i> ; 1.84 mutant larvae were expected. |       |          |       |       |                 |       |          |       |        |                 |       |          |       |        |
| age (11dpf vs. 10dpf)            | 3.904                                                                                                                     | 1.404 | 1.52E-04 | 1.929 | 7.898 | 2.172           | 0.848 | 4.71E-02 | 1.010 | 4.670  | 2.011           | 0.802 | 7.99E-02 | 0.920 | 4.395  |
| time of day (in hours since 9AM) | 0.923                                                                                                                     | 0.080 | 3.56E-01 | 0.780 | 1.093 | 0.999           | 0.099 | 9.92E-01 | 0.823 | 1.212  | 1.060           | 0.109 | 5.68E-01 | 0.867 | 1.297  |
| body length (in SD)              | -                                                                                                                         | -     | -        | -     | -     | 0.334           | 0.083 | 9.35E-06 | 0.206 | 0.543  | 0.344           | 0.091 | 5.17E-05 | 0.205 | 0.576  |
| dorsal body surface area (in SD) | -                                                                                                                         | -     | -        | -     | -     | 0.345           | 0.089 | 3.82E-05 | 0.208 | 0.573  | 0.356           | 0.097 | 1.59E-04 | 0.208 | 0.609  |
| LDLc levels (in SD)              | -                                                                                                                         | -     | -        | -     | -     | -               | -     | -        | -     | -      | 1.076           | 0.262 | 7.63E-01 | 0.668 | 1.734  |
| HDLc levels (in SD)              | -                                                                                                                         | -     | -        | -     | -     | -               | -     | -        | -     | -      | 1.161           | 0.247 | 4.81E-01 | 0.766 | 1.761  |
| triglyceride levels (in SD)      | -                                                                                                                         | -     | -        | -     | -     | -               | -     | -        | -     | -      | 0.634           | 0.157 | 6.58E-02 | 0.390 | 1.030  |
| glucose levels                   | -                                                                                                                         | -     | -        | -     | -     | -               | -     | -        | -     | -      | 1.054           | 0.239 | 8.16E-01 | 0.676 | 1.643  |
| intercept                        | 0.139                                                                                                                     | 0.063 | 1.19E-05 | 0.057 | 0.336 | 0.096           | 0.050 | 6.94E-06 | 0.035 | 0.267  | 0.069           | 0.038 | 1.68E-06 | 0.023 | 0.205  |

  

|                                  | Many false positive lipid deposits                                                                                                                          |       |          |       |        |                 |       |          |       |        |                 |       |          |       |        |
|----------------------------------|-------------------------------------------------------------------------------------------------------------------------------------------------------------|-------|----------|-------|--------|-----------------|-------|----------|-------|--------|-----------------|-------|----------|-------|--------|
|                                  | Model 1 (n=364)                                                                                                                                             |       |          |       |        | Model 2 (n=331) |       |          |       |        | Model 3 (n=305) |       |          |       |        |
|                                  | Effect                                                                                                                                                      | SE    | P        | lci   | uci    | Effect          | SE    | P        | lci   | uci    | Effect          | SE    | P        | lci   | uci    |
| <i>lpar2a</i>                    | all 90 larvae with many false positive lipid deposits were wildtype for mutations in <i>lpar2a</i> ; 1.22 mutant larvae were expected.                      |       |          |       |        |                 |       |          |       |        |                 |       |          |       |        |
| <i>lpar2b</i>                    | all 90 larvae with many false positive lipid deposits were wildtype or had a missed call for mutations in <i>lpar2b</i> ; 1.46 mutant larvae were expected. |       |          |       |        |                 |       |          |       |        |                 |       |          |       |        |
| <i>gatad2ab</i>                  | 3.137                                                                                                                                                       | 1.951 | 6.59E-02 | 0.927 | 10.613 | 4.301           | 2.900 | 3.05E-02 | 1.147 | 16.125 | 3.799           | 2.631 | 5.40E-02 | 0.977 | 14.766 |
| age (11dpf vs. 10dpf)            | 0.772                                                                                                                                                       | 0.265 | 4.50E-01 | 0.394 | 1.512  | 0.639           | 0.228 | 2.09E-01 | 0.317 | 1.286  | 0.642           | 0.232 | 2.20E-01 | 0.316 | 1.304  |
| time of day (in hours since 9AM) | 0.968                                                                                                                                                       | 0.059 | 5.92E-01 | 0.859 | 1.090  | 0.981           | 0.066 | 7.76E-01 | 0.859 | 1.120  | 0.985           | 0.074 | 8.41E-01 | 0.850 | 1.141  |
| body length (in SD)              | -                                                                                                                                                           | -     | -        | -     | -      | 0.753           | 0.113 | 5.92E-02 | 0.561 | 1.011  | 0.764           | 0.126 | 1.04E-01 | 0.552 | 1.057  |
| dorsal body surface area (in SD) | -                                                                                                                                                           | -     | -        | -     | -      | 0.697           | 0.099 | 1.13E-02 | 0.527 | 0.921  | 0.708           | 0.109 | 2.45E-02 | 0.523 | 0.957  |
| LDLc levels (in SD)              | -                                                                                                                                                           | -     | -        | -     | -      | -               | -     | -        | -     | -      | 0.867           | 0.116 | 2.86E-01 | 0.667 | 1.127  |
| HDLc levels (in SD)              | -                                                                                                                                                           | -     | -        | -     | -      | -               | -     | -        | -     | -      | 1.105           | 0.152 | 4.69E-01 | 0.843 | 1.448  |
| triglyceride levels (in SD)      | -                                                                                                                                                           | -     | -        | -     | -      | -               | -     | -        | -     | -      | 1.113           | 0.178 | 5.03E-01 | 0.813 | 1.524  |
| glucose levels                   | -                                                                                                                                                           | -     | -        | -     | -      | -               | -     | -        | -     | -      | 0.843           | 0.122 | 2.39E-01 | 0.635 | 1.120  |
| intercept                        | 0.382                                                                                                                                                       | 0.122 | 2.67E-03 | 0.204 | 0.716  | 0.386           | 0.134 | 5.99E-03 | 0.196 | 0.761  | 0.384           | 0.140 | 8.74E-03 | 0.188 | 0.785  |

continued Supplementary Table 38

|                                  | Many false negative lipid deposits                                                                                                     |       |          |       |        |                 |       |          |       |        |                 |       |          |       |        |
|----------------------------------|----------------------------------------------------------------------------------------------------------------------------------------|-------|----------|-------|--------|-----------------|-------|----------|-------|--------|-----------------|-------|----------|-------|--------|
|                                  | Model 1 (n=287)                                                                                                                        |       |          |       |        | Model 2 (n=265) |       |          |       |        | Model 3 (n=243) |       |          |       |        |
|                                  | Effect                                                                                                                                 | SE    | P        | lci   | uci    | Effect          | SE    | P        | lci   | uci    | Effect          | SE    | P        | lci   | uci    |
| <i>lpar2a</i>                    | all 19 larvae with many false negative lipid deposits were wildtype for mutations in <i>lpar2a</i> ; 0.32 mutant larvae were expected. |       |          |       |        |                 |       |          |       |        |                 |       |          |       |        |
| <i>lpar2b</i>                    | all 19 larvae with many false negative lipid deposits were wildtype for mutations in <i>lpar2b</i> ; 0.38 mutant larvae were expected. |       |          |       |        |                 |       |          |       |        |                 |       |          |       |        |
| <i>gatad2ab</i>                  | 0.934                                                                                                                                  | 1.481 | 9.66E-01 | 0.042 | 20.905 | 1.128           | 1.885 | 9.42E-01 | 0.043 | 29.838 | 2.649           | 4.643 | 5.78E-01 | 0.085 | 82.204 |
| age (11dpf vs. 10dpf)            | 2.011                                                                                                                                  | 1.051 | 1.81E-01 | 0.722 | 5.601  | 1.209           | 0.651 | 7.25E-01 | 0.421 | 3.476  | 1.270           | 0.702 | 6.66E-01 | 0.430 | 3.752  |
| time of day (in hours since 9AM) | 0.872                                                                                                                                  | 0.103 | 2.47E-01 | 0.691 | 1.100  | 0.917           | 0.117 | 4.97E-01 | 0.715 | 1.177  | 1.000           | 0.133 | 1.00E+00 | 0.770 | 1.299  |
| body length (in SD)              | -                                                                                                                                      | -     | -        | -     | -      | 0.542           | 0.158 | 3.51E-02 | 0.307 | 0.958  | 0.564           | 0.179 | 7.11E-02 | 0.303 | 1.050  |
| dorsal body surface area (in SD) | -                                                                                                                                      | -     | -        | -     | -      | 0.449           | 0.139 | 9.81E-03 | 0.244 | 0.824  | 0.479           | 0.157 | 2.49E-02 | 0.252 | 0.911  |
| LDLc levels (in SD)              | -                                                                                                                                      | -     | -        | -     | -      | -               | -     | -        | -     | -      | 1.064           | 0.293 | 8.22E-01 | 0.620 | 1.826  |
| HDLc levels (in SD)              | -                                                                                                                                      | -     | -        | -     | -      | -               | -     | -        | -     | -      | 1.437           | 0.375 | 1.65E-01 | 0.861 | 2.397  |
| triglyceride levels (in SD)      | -                                                                                                                                      | -     | -        | -     | -      | -               | -     | -        | -     | -      | 0.749           | 0.231 | 3.49E-01 | 0.409 | 1.371  |
| glucose levels                   | -                                                                                                                                      | -     | -        | -     | -      | -               | -     | -        | -     | -      | 1.389           | 0.367 | 2.13E-01 | 0.828 | 2.332  |
| intercept                        | 0.110                                                                                                                                  | 0.064 | 1.38E-04 | 0.035 | 0.342  | 0.106           | 0.065 | 2.63E-04 | 0.032 | 0.355  | 0.063           | 0.044 | 5.84E-05 | 0.017 | 0.243  |

  

|                                  | Transparent larvae                                                                                                                    |       |          |       |        |                 |       |          |       |        |                 |       |          |       |        |
|----------------------------------|---------------------------------------------------------------------------------------------------------------------------------------|-------|----------|-------|--------|-----------------|-------|----------|-------|--------|-----------------|-------|----------|-------|--------|
|                                  | Model 1 (n=280)                                                                                                                       |       |          |       |        | Model 2 (n=258) |       |          |       |        | Model 3 (n=236) |       |          |       |        |
|                                  | Effect                                                                                                                                | SE    | P        | lci   | uci    | Effect          | SE    | P        | lci   | uci    | Effect          | SE    | P        | lci   | uci    |
| <i>lpar2a</i>                    | all 12 larvae that appeared particularly transparent were wildtype for mutations in <i>lpar2a</i> ; 0.21 mutant larvae were expected. |       |          |       |        |                 |       |          |       |        |                 |       |          |       |        |
| <i>lpar2b</i>                    | all 12 larvae that appeared particularly transparent were wildtype for mutations in <i>lpar2b</i> ; 0.25 mutant larvae were expected. |       |          |       |        |                 |       |          |       |        |                 |       |          |       |        |
| <i>gatad2ab</i>                  | 1.849                                                                                                                                 | 2.961 | 7.01E-01 | 0.080 | 42.635 | 1.376           | 2.245 | 8.45E-01 | 0.056 | 33.657 | 0.753           | 1.386 | 8.77E-01 | 0.020 | 27.745 |
| age (11dpf vs. 10dpf)            | 2.166                                                                                                                                 | 1.382 | 2.26E-01 | 0.620 | 7.565  | 3.442           | 2.524 | 9.18E-02 | 0.818 | 14.488 | 2.309           | 1.942 | 3.20E-01 | 0.444 | 12.004 |
| time of day (in hours since 9AM) | 0.900                                                                                                                                 | 0.135 | 4.83E-01 | 0.671 | 1.207  | 0.871           | 0.131 | 3.60E-01 | 0.648 | 1.170  | 0.902           | 0.185 | 6.17E-01 | 0.603 | 1.350  |
| body length (in SD)              | -                                                                                                                                     | -     | -        | -     | -      | 1.344           | 0.452 | 3.80E-01 | 0.695 | 2.598  | 0.762           | 0.295 | 4.83E-01 | 0.357 | 1.626  |
| dorsal body surface area (in SD) | -                                                                                                                                     | -     | -        | -     | -      | 1.923           | 0.681 | 6.49E-02 | 0.960 | 3.851  | 1.344           | 0.553 | 4.73E-01 | 0.599 | 3.012  |
| LDLc levels (in SD)              | -                                                                                                                                     | -     | -        | -     | -      | -               | -     | -        | -     | -      | 1.160           | 0.335 | 6.07E-01 | 0.659 | 2.045  |
| HDLc levels (in SD)              | -                                                                                                                                     | -     | -        | -     | -      | -               | -     | -        | -     | -      | 0.915           | 0.293 | 7.81E-01 | 0.489 | 1.714  |
| triglyceride levels (in SD)      | -                                                                                                                                     | -     | -        | -     | -      | -               | -     | -        | -     | -      | 4.396           | 1.989 | 1.06E-03 | 1.811 | 10.669 |
| glucose levels                   | -                                                                                                                                     | -     | -        | -     | -      | -               | -     | -        | -     | -      | 0.756           | 0.268 | 4.30E-01 | 0.377 | 1.516  |
| intercept                        | 0.057                                                                                                                                 | 0.043 | 1.51E-04 | 0.013 | 0.251  | 0.043           | 0.035 | 1.12E-04 | 0.009 | 0.211  | 0.019           | 0.023 | 8.75E-04 | 0.002 | 0.197  |

continued Supplementary Table 38

|                                  | Bad quality images of macrophages                                                                                                            |       |          |       |       |                 |       |          |       |       |                 |       |       |          |       |       |
|----------------------------------|----------------------------------------------------------------------------------------------------------------------------------------------|-------|----------|-------|-------|-----------------|-------|----------|-------|-------|-----------------|-------|-------|----------|-------|-------|
|                                  | Model 1 (n=323)                                                                                                                              |       |          |       |       | Model 2 (n=291) |       |          |       |       | Model 3 (n=269) |       |       |          |       |       |
|                                  | Effect                                                                                                                                       | SE    | P        | lci   | uci   | Effect          | SE    | P        | lci   | uci   | Effect          | SE    | P     | lci      | uci   |       |
| <i>lpar2a</i>                    | all 12 larvae that had bad quality images for macrophages were wildtype for mutations in <i>lpar2a</i> ; 0.27 mutant larvae were expected.   |       |          |       |       |                 |       |          |       |       |                 |       |       |          |       |       |
| <i>lpar2b</i>                    | all 12 larvae that had bad quality images for macrophages were wildtype for mutations in <i>lpar2b</i> ; 0.13 mutant larvae were expected.   |       |          |       |       |                 |       |          |       |       |                 |       |       |          |       |       |
| <i>gatad2ab</i>                  | all 12 larvae that had bad quality images for macrophages were wildtype for mutations in <i>gatad2ab</i> ; 0.83 mutant larvae were expected. |       |          |       |       |                 |       |          |       |       |                 |       |       |          |       |       |
| time of day (in hours since 9AM) | 1.004                                                                                                                                        | 0.144 | 9.79E-01 | 0.758 | 1.329 | 1.097           | 0.201 | 6.12E-01 | 0.767 | 1.570 | 291             | 1.256 | 0.277 | 3.01E-01 | 0.815 | 1.935 |
| body length (in SD)              | -                                                                                                                                            | -     | -        | -     | -     | 0.301           | 0.110 | 1.00E-03 | 0.147 | 0.615 | 291             | 0.309 | 0.120 | 2.39E-03 | 0.145 | 0.660 |
| dorsal body surface area (in SD) | -                                                                                                                                            | -     | -        | -     | -     | 1.353           | 0.508 | 4.20E-01 | 0.649 | 2.825 | 291             | 1.734 | 0.737 | 1.95E-01 | 0.754 | 3.988 |
| LDLc levels (in SD)              | -                                                                                                                                            | -     | -        | -     | -     | -               | -     | -        | -     | -     | 291             | 0.942 | 0.366 | 8.77E-01 | 0.440 | 2.016 |
| HDLc levels (in SD)              | -                                                                                                                                            | -     | -        | -     | -     | -               | -     | -        | -     | -     | 291             | 1.071 | 0.358 | 8.38E-01 | 0.556 | 2.063 |
| triglyceride levels (in SD)      | -                                                                                                                                            | -     | -        | -     | -     | -               | -     | -        | -     | -     | 291             | 0.668 | 0.284 | 3.42E-01 | 0.290 | 1.536 |
| glucose levels                   | -                                                                                                                                            | -     | -        | -     | -     | -               | -     | -        | -     | -     | 291             | 0.709 | 0.250 | 3.30E-01 | 0.355 | 1.416 |
| intercept                        | 0.038                                                                                                                                        | 0.027 | 5.64E-06 | 0.009 | 0.156 | 0.015           | 0.015 | 1.26E-05 | 0.002 | 0.100 | 291             | 0.008 | 0.009 | 3.87E-05 | 0.001 | 0.078 |

  

|                                  | Many false positive macrophages                                                                                                           |       |          |       |       |                 |       |          |       |       |                 |       |          |       |       |
|----------------------------------|-------------------------------------------------------------------------------------------------------------------------------------------|-------|----------|-------|-------|-----------------|-------|----------|-------|-------|-----------------|-------|----------|-------|-------|
|                                  | Model 1 (n=401)                                                                                                                           |       |          |       |       | Model 2 (n=371) |       |          |       |       | Model 3 (n=348) |       |          |       |       |
|                                  | Effect                                                                                                                                    | SE    | P        | lci   | uci   | Effect          | SE    | P        | lci   | uci   | Effect          | SE    | P        | lci   | uci   |
| <i>lpar2a</i>                    | all 10 larvae that had many false positive macrophages were wildtype for mutations in <i>lpar2a</i> ; 0.22 mutant larvae were expected.   |       |          |       |       |                 |       |          |       |       |                 |       |          |       |       |
| <i>lpar2b</i>                    | all 10 larvae that had many false positive macrophages were wildtype for mutations in <i>lpar2b</i> ; 0.11 mutant larvae were expected.   |       |          |       |       |                 |       |          |       |       |                 |       |          |       |       |
| <i>gatad2ab</i>                  | all 10 larvae that had many false positive macrophages were wildtype for mutations in <i>gatad2ab</i> ; 0.69 mutant larvae were expected. |       |          |       |       |                 |       |          |       |       |                 |       |          |       |       |
| age (11dpf vs. 10dpf)            | 1.645                                                                                                                                     | 1.155 | 4.78E-01 | 0.416 | 6.513 | 1.454           | 1.060 | 6.07E-01 | 0.349 | 6.069 | 2.040           | 1.563 | 3.52E-01 | 0.455 | 9.154 |
| time of day (in hours since 9AM) | 0.907                                                                                                                                     | 0.143 | 5.35E-01 | 0.666 | 1.235 | 0.909           | 0.143 | 5.42E-01 | 0.668 | 1.236 | 0.733           | 0.149 | 1.27E-01 | 0.492 | 1.092 |
| body length (in SD)              | -                                                                                                                                         | -     | -        | -     | -     | 0.718           | 0.246 | 3.34E-01 | 0.367 | 1.406 | 0.646           | 0.255 | 2.68E-01 | 0.298 | 1.400 |
| dorsal body surface area (in SD) | -                                                                                                                                         | -     | -        | -     | -     | 1.489           | 0.513 | 2.48E-01 | 0.758 | 2.924 | 1.005           | 0.378 | 9.90E-01 | 0.481 | 2.101 |
| LDLc levels (in SD)              | -                                                                                                                                         | -     | -        | -     | -     | -               | -     | -        | -     | -     | 2.512           | 1.011 | 2.21E-02 | 1.141 | 5.528 |
| HDLc levels (in SD)              | -                                                                                                                                         | -     | -        | -     | -     | -               | -     | -        | -     | -     | 0.728           | 0.297 | 4.35E-01 | 0.327 | 1.618 |
| triglyceride levels (in SD)      | -                                                                                                                                         | -     | -        | -     | -     | -               | -     | -        | -     | -     | 1.196           | 0.509 | 6.73E-01 | 0.520 | 2.752 |
| glucose levels                   | -                                                                                                                                         | -     | -        | -     | -     | -               | -     | -        | -     | -     | 0.843           | 0.317 | 6.51E-01 | 0.404 | 1.762 |
| intercept                        | 0.035                                                                                                                                     | 0.026 | 9.99E-06 | 0.008 | 0.154 | 0.036           | 0.026 | 7.34E-06 | 0.008 | 0.153 | 0.050           | 0.042 | 3.21E-04 | 0.010 | 0.257 |

continued Supplementary Table 38

|                                  | Clumped macrophages                                                                                                       |        |          |       |          |                 |        |          |       |          |                 |         |          |       |          |
|----------------------------------|---------------------------------------------------------------------------------------------------------------------------|--------|----------|-------|----------|-----------------|--------|----------|-------|----------|-----------------|---------|----------|-------|----------|
|                                  | Model 1 (n=408)                                                                                                           |        |          |       |          | Model 2 (n=378) |        |          |       |          | Model 3 (n=353) |         |          |       |          |
|                                  | Effect                                                                                                                    | SE     | P        | lci   | uci      | Effect          | SE     | P        | lci   | uci      | Effect          | SE      | P        | lci   | uci      |
| <i>lpar2a</i>                    | all 11 larvae with clumped macrophages were wildtype for mutations in <i>lpar2a</i> ; 0.25 mutant larvae were expected.   |        |          |       |          |                 |        |          |       |          |                 |         |          |       |          |
| <i>lpar2b</i>                    | 28.540                                                                                                                    | 53.945 | 7.62E-02 | 0.702 | 1159.755 | 29.048          | 56.199 | 8.16E-02 | 0.655 | 1287.961 | 82.944          | 202.163 | 6.99E-02 | 0.698 | 9850.414 |
| <i>gatad2ab</i>                  | all 11 larvae with clumped macrophages were wildtype for mutations in <i>gatad2ab</i> ; 0.76 mutant larvae were expected. |        |          |       |          |                 |        |          |       |          |                 |         |          |       |          |
| age (11dpf vs. 10dpf)            | 0.380                                                                                                                     | 0.404  | 3.63E-01 | 0.047 | 3.054    | 0.368           | 0.395  | 3.51E-01 | 0.045 | 3.014    | 0.333           | 0.368   | 3.19E-01 | 0.038 | 2.904    |
| time of day (in hours since 9AM) | 0.615                                                                                                                     | 0.117  | 1.07E-02 | 0.424 | 0.893    | 0.628           | 0.120  | 1.49E-02 | 0.432 | 0.913    | 0.557           | 0.136   | 1.67E-02 | 0.345 | 0.899    |
| body length (in SD)              | -                                                                                                                         | -      | -        | -     | -        | 0.871           | 0.304  | 6.93E-01 | 0.439 | 1.727    | 0.605           | 0.251   | 2.26E-01 | 0.268 | 1.364    |
| dorsal body surface area (in SD) | -                                                                                                                         | -      | -        | -     | -        | 1.251           | 0.414  | 4.99E-01 | 0.654 | 2.394    | 1.297           | 0.480   | 4.83E-01 | 0.628 | 2.678    |
| LDLc levels (in SD)              | -                                                                                                                         | -      | -        | -     | -        | -               | -      | -        | -     | -        | 1.771           | 0.732   | 1.66E-01 | 0.788 | 3.981    |
| HDLc levels (in SD)              | -                                                                                                                         | -      | -        | -     | -        | -               | -      | -        | -     | -        | 0.618           | 0.221   | 1.79E-01 | 0.306 | 1.247    |
| triglyceride levels (in SD)      | -                                                                                                                         | -      | -        | -     | -        | -               | -      | -        | -     | -        | 0.681           | 0.281   | 3.53E-01 | 0.303 | 1.530    |
| glucose levels                   | -                                                                                                                         | -      | -        | -     | -        | -               | -      | -        | -     | -        | 1.245           | 0.449   | 5.44E-01 | 0.614 | 2.524    |
| intercept                        | 0.171                                                                                                                     | 0.111  | 6.52E-03 | 0.048 | 0.611    | 0.171           | 0.112  | 7.11E-03 | 0.047 | 0.619    | 0.170           | 0.134   | 2.40E-02 | 0.037 | 0.792    |

  

|                                  | Macrophages outside the region of interest                                                                                                            |       |          |       |       |                 |       |          |       |       |                 |       |          |       |       |
|----------------------------------|-------------------------------------------------------------------------------------------------------------------------------------------------------|-------|----------|-------|-------|-----------------|-------|----------|-------|-------|-----------------|-------|----------|-------|-------|
|                                  | Model 1 (n=406)                                                                                                                                       |       |          |       |       | Model 2 (n=376) |       |          |       |       | Model 3 (n=354) |       |          |       |       |
|                                  | Effect                                                                                                                                                | SE    | P        | lci   | uci   | Effect          | SE    | P        | lci   | uci   | Effect          | SE    | P        | lci   | uci   |
| <i>lpar2a</i>                    | all 15 larvae with many macrophages outside the region of interest were wildtype for mutations in <i>lpar2a</i> ; 0.33 mutant larvae were expected.   |       |          |       |       |                 |       |          |       |       |                 |       |          |       |       |
| <i>lpar2b</i>                    | all 15 larvae with many macrophages outside the region of interest were wildtype for mutations in <i>lpar2b</i> ; 0.17 mutant larvae were expected.   |       |          |       |       |                 |       |          |       |       |                 |       |          |       |       |
| <i>gatad2ab</i>                  | all 15 larvae with many macrophages outside the region of interest were wildtype for mutations in <i>gatad2ab</i> ; 1.02 mutant larvae were expected. |       |          |       |       |                 |       |          |       |       |                 |       |          |       |       |
| age (11dpf vs. 10dpf)            | 1.361                                                                                                                                                 | 0.819 | 6.08E-01 | 0.418 | 4.429 | 1.031           | 0.636 | 9.61E-01 | 0.308 | 3.453 | 1.141           | 0.731 | 8.37E-01 | 0.325 | 4.003 |
| time of day (in hours since 9AM) | 0.742                                                                                                                                                 | 0.107 | 3.76E-02 | 0.560 | 0.983 | 0.848           | 0.130 | 2.82E-01 | 0.628 | 1.145 | 0.818           | 0.133 | 2.18E-01 | 0.594 | 1.126 |
| body length (in SD)              | -                                                                                                                                                     | -     | -        | -     | -     | 0.310           | 0.121 | 2.80E-03 | 0.144 | 0.668 | 0.245           | 0.103 | 7.82E-04 | 0.108 | 0.557 |
| dorsal body surface area (in SD) | -                                                                                                                                                     | -     | -        | -     | -     | 0.573           | 0.208 | 1.25E-01 | 0.282 | 1.167 | 0.541           | 0.198 | 9.35E-02 | 0.264 | 1.109 |
| LDLc levels (in SD)              | -                                                                                                                                                     | -     | -        | -     | -     | -               | -     | -        | -     | -     | 2.382           | 0.801 | 9.83E-03 | 1.233 | 4.604 |
| HDLc levels (in SD)              | -                                                                                                                                                     | -     | -        | -     | -     | -               | -     | -        | -     | -     | 1.436           | 0.512 | 3.11E-01 | 0.713 | 2.890 |
| triglyceride levels (in SD)      | -                                                                                                                                                     | -     | -        | -     | -     | -               | -     | -        | -     | -     | 0.965           | 0.359 | 9.23E-01 | 0.465 | 1.999 |
| glucose levels                   | -                                                                                                                                                     | -     | -        | -     | -     | -               | -     | -        | -     | -     | 1.103           | 0.355 | 7.60E-01 | 0.587 | 2.071 |
| intercept                        | 0.116                                                                                                                                                 | 0.068 | 2.27E-04 | 0.037 | 0.364 | 0.045           | 0.034 | 3.76E-05 | 0.010 | 0.196 | 0.037           | 0.030 | 6.52E-05 | 0.007 | 0.186 |

continued Supplementary Table 38

|                                  | Clumped neutrophils                                                                                                     |       |          |       |        |                 |       |          |       |        |                 |       |          |       |        |
|----------------------------------|-------------------------------------------------------------------------------------------------------------------------|-------|----------|-------|--------|-----------------|-------|----------|-------|--------|-----------------|-------|----------|-------|--------|
|                                  | Model 1 (n=456)                                                                                                         |       |          |       |        | Model 2 (n=427) |       |          |       |        | Model 3 (n=402) |       |          |       |        |
|                                  | Effect                                                                                                                  | SE    | P        | lci   | uci    | Effect          | SE    | P        | lci   | uci    | Effect          | SE    | P        | lci   | uci    |
| <i>lpar2a</i>                    | 3.869                                                                                                                   | 3.250 | 1.07E-01 | 0.746 | 20.074 | 3.695           | 3.109 | 1.20E-01 | 0.710 | 19.221 | 3.609           | 3.246 | 1.54E-01 | 0.619 | 21.040 |
| <i>lpar2b</i>                    | all 34 larvae with clumped neutrophils were wildtype for mutations in <i>lpar2b</i> ; 0.44 mutant larvae were expected. |       |          |       |        |                 |       |          |       |        |                 |       |          |       |        |
| <i>gatad2ab</i>                  | 0.892                                                                                                                   | 1.010 | 9.20E-01 | 0.097 | 8.215  | 0.835           | 0.955 | 8.75E-01 | 0.089 | 7.863  | 1.235           | 1.439 | 8.56E-01 | 0.126 | 12.110 |
| age (11dpf vs. 10dpf)            | 0.891                                                                                                                   | 0.404 | 8.00E-01 | 0.367 | 2.166  | 0.790           | 0.367 | 6.12E-01 | 0.318 | 1.965  | 0.767           | 0.371 | 5.83E-01 | 0.298 | 1.978  |
| time of day (in hours since 9AM) | 0.980                                                                                                                   | 0.086 | 8.17E-01 | 0.825 | 1.164  | 0.997           | 0.092 | 9.75E-01 | 0.832 | 1.194  | 0.961           | 0.103 | 7.10E-01 | 0.779 | 1.185  |
| body length (in SD)              | -                                                                                                                       | -     | -        | -     | -      | 0.859           | 0.166 | 4.33E-01 | 0.588 | 1.255  | 1.023           | 0.232 | 9.20E-01 | 0.657 | 1.594  |
| dorsal body surface area (in SD) | -                                                                                                                       | -     | -        | -     | -      | 1.073           | 0.207 | 7.16E-01 | 0.735 | 1.566  | 0.916           | 0.197 | 6.85E-01 | 0.601 | 1.397  |
| LDLc levels (in SD)              | -                                                                                                                       | -     | -        | -     | -      | -               | -     | -        | -     | -      | 0.876           | 0.182 | 5.25E-01 | 0.584 | 1.316  |
| HDLc levels (in SD)              | -                                                                                                                       | -     | -        | -     | -      | -               | -     | -        | -     | -      | 0.959           | 0.184 | 8.28E-01 | 0.659 | 1.396  |
| triglyceride levels (in SD)      | -                                                                                                                       | -     | -        | -     | -      | -               | -     | -        | -     | -      | 0.838           | 0.186 | 4.28E-01 | 0.542 | 1.296  |
| glucose levels                   | -                                                                                                                       | -     | -        | -     | -      | -               | -     | -        | -     | -      | 1.151           | 0.223 | 4.69E-01 | 0.787 | 1.684  |
| intercept                        | 0.087                                                                                                                   | 0.038 | 2.33E-08 | 0.037 | 0.204  | 0.089           | 0.040 | 5.86E-08 | 0.037 | 0.213  | 0.091           | 0.044 | 6.33E-07 | 0.036 | 0.234  |

  

|                                  | Partly imaged larvae (n=386)                                                                                                |       |          |       |       |
|----------------------------------|-----------------------------------------------------------------------------------------------------------------------------|-------|----------|-------|-------|
|                                  | Effect                                                                                                                      | SE    | P        | lci   | uci   |
| <i>lpar2a</i>                    | all 29 larvae that were only partly imaged were wildtype for mutations in <i>lpar2a</i> ; 0.58 mutant larvae were expected. |       |          |       |       |
| <i>lpar2b</i>                    | all 29 larvae that were only partly imaged were wildtype for mutations in <i>lpar2b</i> ; 0.35 mutant larvae were expected. |       |          |       |       |
| <i>gatad2ab</i>                  | 0.889                                                                                                                       | 1.012 | 9.18E-01 | 0.096 | 8.270 |
| time of day (in hours since 9AM) | 1.170                                                                                                                       | 0.112 | 1.02E-01 | 0.969 | 1.411 |
| intercept                        | 0.039                                                                                                                       | 0.020 | 5.32E-10 | 0.014 | 0.108 |

Associations are shown for criteria that resulted in the exclusion of at least 10 larvae. Many false positives: >20% of true negative objects were falsely detected by the quantification pipeline. Many false negatives: >20% of true positives objects were falsely excluded by the quantification pipeline. Associations were examined using logistic regression models. Model 1: adjusted for time of day; Model 2: additionally adjusted for body length and dorsal surface area; Model 3: additionally adjusted for whole-body triglyceride and glucose levels. Dorsal body surface area was normalized for body length using residuals; whole-body LDL cholesterol, HDL cholesterol, triglyceride and glucose levels were normalized for protein level using residuals. Effects shown for *lpar2a*, *lpar2b* and *gatad2ab* are for each additional mutated allele. Adjusting for batch would have resulted in the exclusion of larvae. Lci and uci are lower and upper boundaries of the 95% confidence interval.



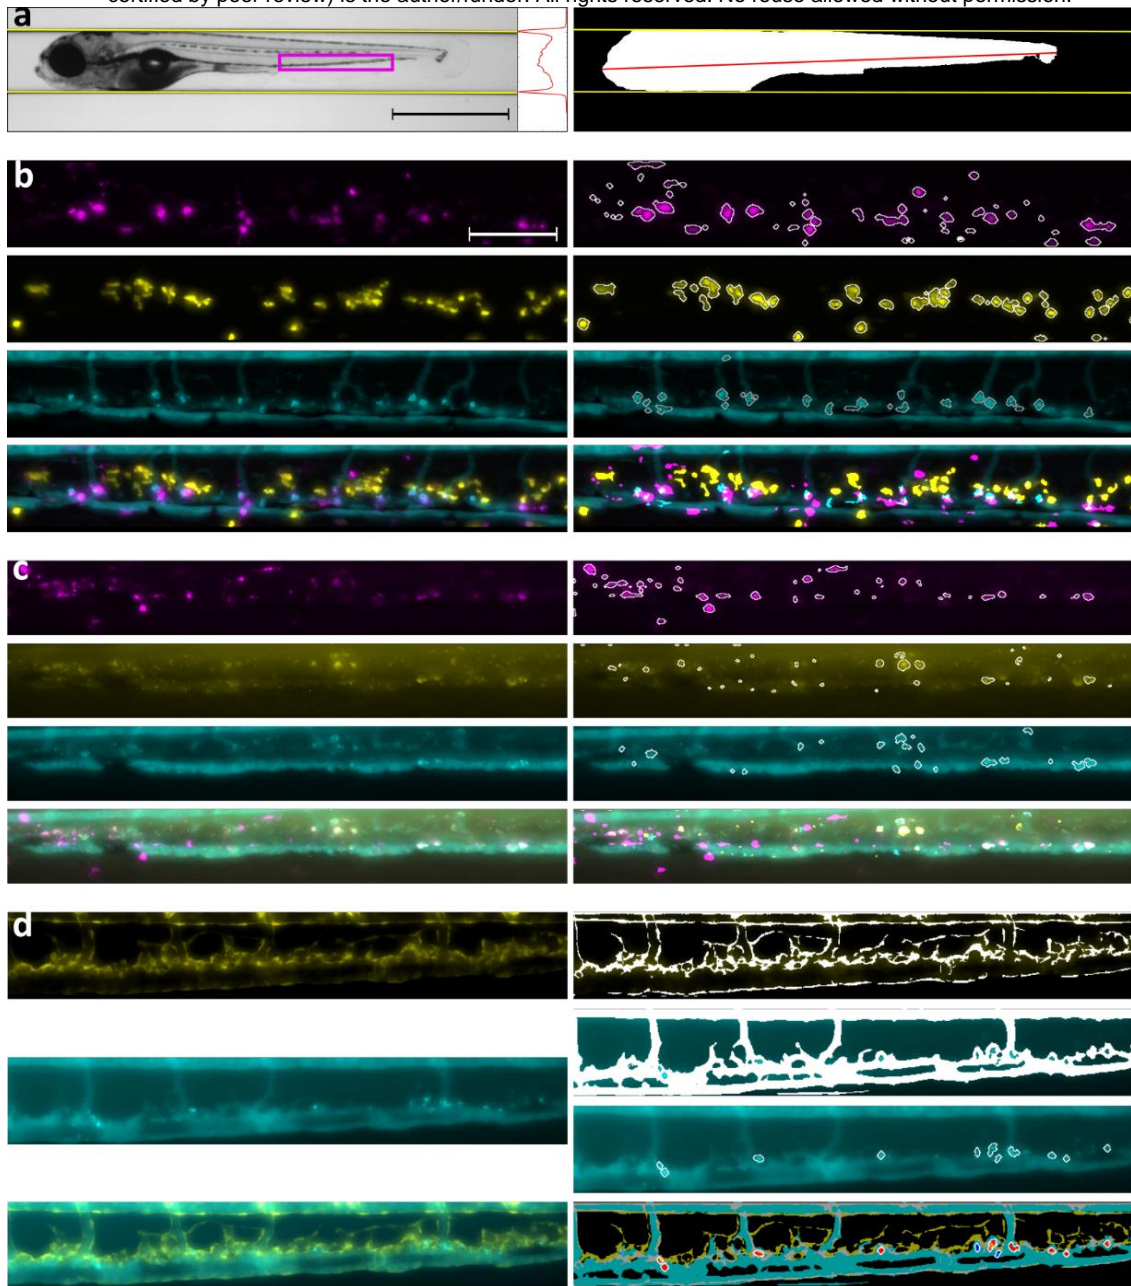

Figure 1. Raw data (left) and objective, semi-automated quantification (right) of body size and early-stage atherosclerosis in 10-day-old zebrafish larvae. a) Left: A bright field image of a zebrafish larva in lateral orientation with projection of all intensity values to the y-axis. The two distinct minima in the projection represent the walls of the capillary, outlined in yellow (scale bar = 1 mm). The region of the tail that was imaged to quantify vascular atherogenic traits is highlighted in magenta. Right: a binary mask of the same larva, with lateral surface area in white, and body length in red. b) A Tg(mpeg1-mCherry; mpo-EGFP) transgenic larva with fluorescently labelled macrophages (top, magenta) and neutrophils (2<sup>nd</sup> from top, yellow). Circulating lipids and vascular lipid deposits were stained with a dye (3<sup>rd</sup> from the top, cyan). The overlay (bottom) shows co-localization of all traits (scale bar = 100µm). c) A Tg(mpeg1-mCherry; hsp70:IK17-EGFP) transgenic larva with fluorescently labelled macrophages (top, magenta) and oxidized LDL (2<sup>nd</sup> from top, yellow) with stained lipids (3<sup>rd</sup> from top, cyan). The overlay shows co-localization of all traits (bottom). d) A Tg(flκ-EGFP) transgenic larva with fluorescently labelled endothelial cells showing endothelial surface area (top, yellow); stained lipids (2<sup>nd</sup> from top, cyan) from which both circulating lipids (right, 2<sup>nd</sup> from top) and vascular lipid deposition (right, 3<sup>rd</sup> from top) were quantified; and an overlay that enabled distinguishing between lipid deposition inside (in red) and outside the endothelium (bottom right, blue).



Figure 2. The effect of overfeeding and cholesterol supplementation ( $n > 2000$ ); treatment with atorvastatin and ezetimibe ( $n > 1000$ ); and mutations in *apoEa* and *apoBb.1* ( $n = 384$ ) on body size (i), vascular atherogenic traits (ii) and whole-body lipid and glucose levels (iii). Across a-e, dorsal and lateral body surface area and body volume were normalized for body length before the analysis; whole-body lipid and glucose levels were normalized for protein levels; and endothelial thickness was normalized for surface area of the circulation. For normally distributed traits, associations were examined using hierarchical linear models on inverse-normally transformed outcomes. For these traits effect sizes and 95% confidence intervals are expressed in standard deviation units (SD). The remaining vascular atherogenic traits (shown in italics) showed a negative binomial distribution and data were analyzed accordingly. For these traits, effect sizes and 95% confidence intervals are expressed in  $\mu\text{m}^2$ . In d and e, open circles and the dotted lines represent the effect of two functionally knocked-out alleles vs. two unmodified alleles, and full circles and filled lines represent the additive per mutated allele effect. Associations were adjusted for time of day; use of diethyl ether (for overfeeding and cholesterol supplementation); cholesterol supplementation (for overfeeding); the amount fed (for cholesterol supplementation); body length and dorsal body surface area (for vascular outcomes); batch; and transgenic background.



Figure 3. The mutually adjusted effect of mutations in zebrafish orthologues of LPAR2 and GATAD2A (n=547) on body size (i), vascular atherogenic traits (ii) and whole-body lipid and glucose levels (iii) using an additive model. Dorsal and lateral body surface area and body volume were normalized for body length; and whole-body lipid and glucose levels were normalized for protein levels before the analysis. For normally distributed traits, associations were examined using hierarchical linear models on inverse-normally transformed outcomes. For these traits, effect sizes and 95% confidence intervals are expressed in standard deviation units (SD). Some vascular atherogenic traits showed a negative binomial distribution and associations were analyzed accordingly. For these traits (shown in italics), effect sizes and 95% confidence intervals are expressed in  $\mu\text{m}^2$ . Associations were adjusted for time of day; body length and dorsal body surface area (for vascular outcomes); and batch.
